# Supplementary material for: The Exploration of Novel Regulatory Relationships Drives Haloarchaeal Operon-Like Structural Dynamics over Short Evolutionary Distances
Source: MDPI journal article supplement (doi:10.3390/microorganisms8121900), 2020-11-30

**Halalkalicoccus\_jeotagli.gff**

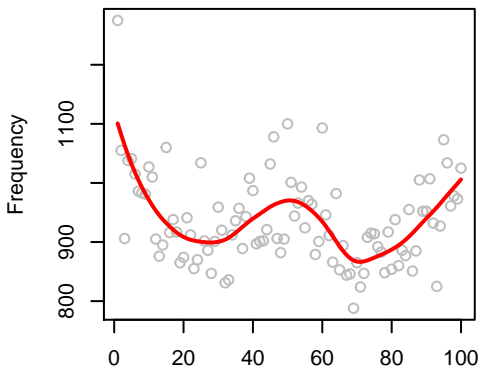

**Haloarcula\_marismortui.gff**

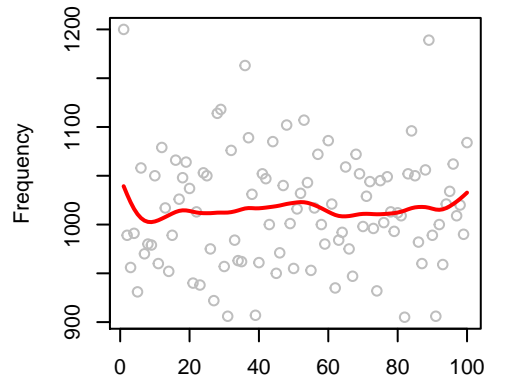

**Halobacterium\_NRC1.gff**

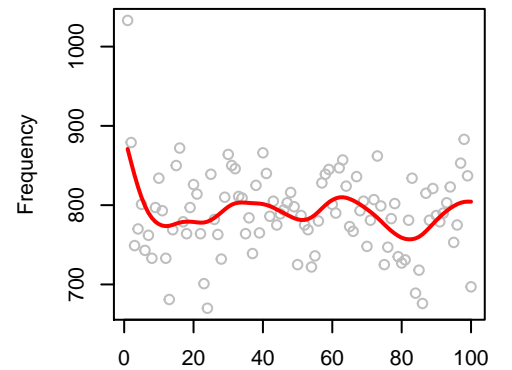

**Haloferax\_volcanii.gff**

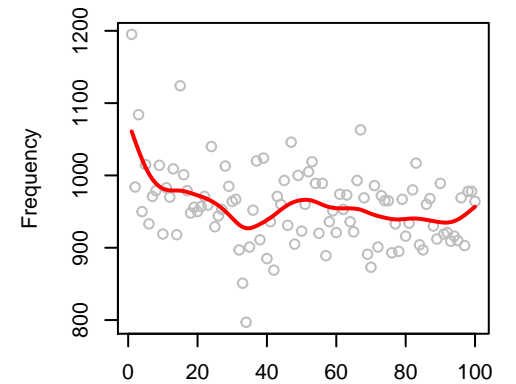

**Halogeometricum\_borinquense.gff**

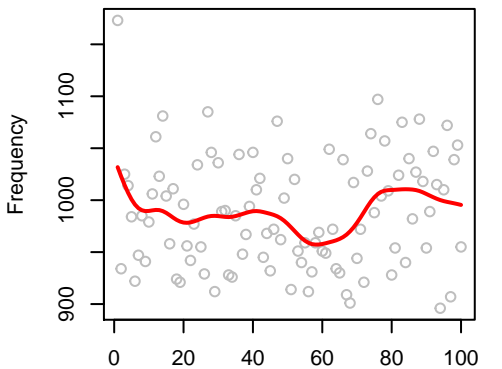

**Halomicrobium\_mukohataei.gff**

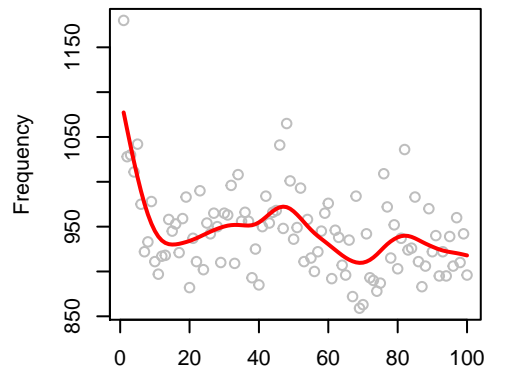

**Haloquadratum\_walsbyi.gff**

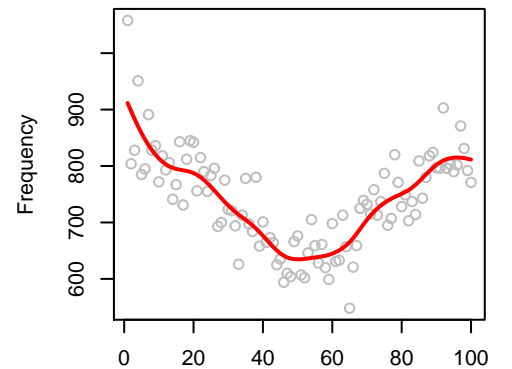

**Halorhabdus\_utahensis.gff**

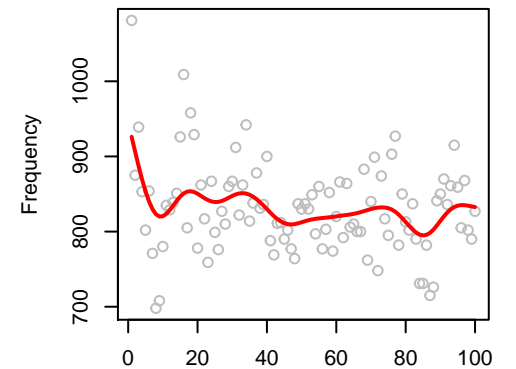

**Haloterrigena\_turkmenica.gff**

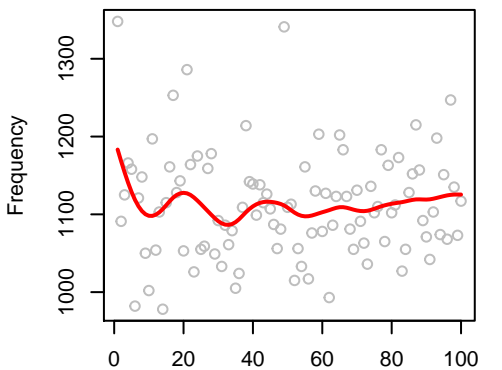

**Natrialba\_magadii.gff**

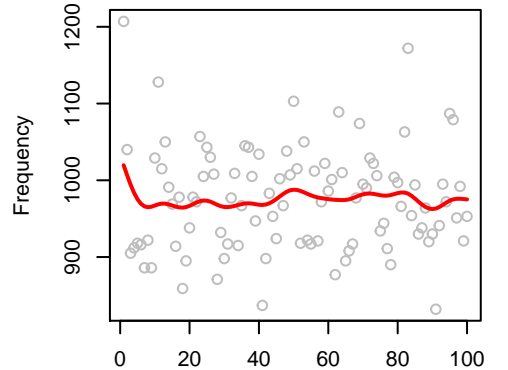

**Natronomonas\_pharaonis.gff**

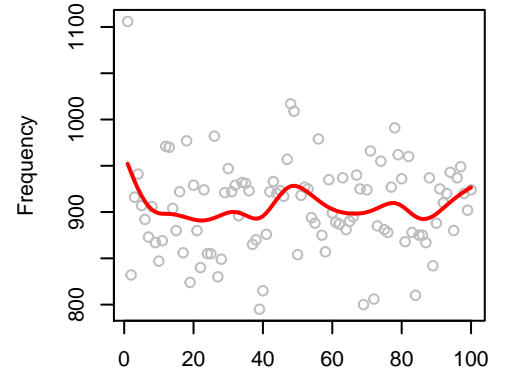

Supplement: s1 [file s1]
