# Supplementary material for: The Exploration of Novel Regulatory Relationships Drives Haloarchaeal Operon-Like Structural Dynamics over Short Evolutionary Distances
Source: Microorganisms. 2020 Nov 30;8(12):1900. doi: 10.3390/microorganisms8121900 (PMC7760734; doi:10.3390/microorganisms8121900)
Supplement: Supplementary file 1 [file microorganisms-08-01900-s001.zip]

Archive with 27 entries (27 files):
- S1_Genomes_and_NCBI_Accession_Numbers_PS.xlsx
- __MACOSX/._S1_Genomes_and_NCBI_Accession_Numbers_PS.xlsx
- S2_OperonTrajectoriesAllComparisons_PS.xlsx
- __MACOSX/._S2_OperonTrajectoriesAllComparisons_PS.xlsx
- S3_UsersManual_v4.pdf
- __MACOSX/._S3_UsersManual_v4.pdf
- S4_Co-occurringGenePairsQuerySet.rtf
- __MACOSX/._S4_Co-occurringGenePairsQuerySet.rtf
- S5_IdenticalContentGroupsQuerySet.rtf
- __MACOSX/._S5_IdenticalContentGroupsQuerySet.rtf
- S6_AdjacentGenePairsQuerySet.rtf
- __MACOSX/._S6_AdjacentGenePairsQuerySet.rtf
- S7_OperonModificationExamples.rtf
- __MACOSX/._S7_OperonModificationExamples.rtf
- S8_DisagreementWithPhylogeny.pdf
- __MACOSX/._S8_DisagreementWithPhylogeny.pdf
- S9_Table_GeneOrderChanges_PS.xlsx
- __MACOSX/._S9_Table_GeneOrderChanges_PS.xlsx
- S10_Clust_866_1119_Seq_and_Align.txt
- __MACOSX/._S10_Clust_866_1119_Seq_and_Align.txt
- S11_OperonForest.pdf
- __MACOSX/._S11_OperonForest.pdf
- S12_Cluster_distance_conservation.pdf
- __MACOSX/._S12_Cluster_distance_conservation.pdf
- S13_JCE_Pipeline_Instructions_v3.pdf
- __MACOSX/._S13_JCE_Pipeline_Instructions_v3.pdf
- S14_JCE_HC_PIPELINE.zip
