# Supplementary material for: The Exploration of Novel Regulatory Relationships Drives Haloarchaeal Operon-Like Structural Dynamics over Short Evolutionary Distances
Source: Microorganisms. 2020 Nov 30;8(12):1900. doi: 10.3390/microorganisms8121900 (PMC7760734; doi:10.3390/microorganisms8121900)
Supplement: Supplementary file 1 [file microorganisms-08-01900-s001.zip › S1_Genomes_and_NCBI_Accession_Numbers_PS.xlsx]

## Sheet: Sheet1
Organism Name	Genbank Accession Number
Halalkalicoccus jeotgali B3 DSM 18796	AOHV00000000
Halalkalicoccus jeotgali B3	CP002062.1-CP002068.1
Haloarcula amylolytica JCM 13557	AOLW00000000
Haloarcula argentinensis DSM 12282	AOLX00000000
Haloarcula californiae ATCC 33799	AOLS00000000
Haloarcula japonica DSM 6131	AOLY00000000
Haloarcula marismortui	AY596290.1-AY596298.1
Haloarcula sinaiiensis ATCC 33800	AOLR00000000
Haloarcula vallismortis ATCC 29715	AOLQ00000000
Halobacterium sp. NRC-1	AE004437.1, AF016485.1, AE004438.1
Halobacterium R1	AM774415.1-AM774419.1
Halobiforma lacisalsi AJ5	AOLZ00000000
Halobiforma nitratireducens JCM 10879	AOMA00000000
Halococcus hamelinensis 100A6	AOMB00000000
Halococcus morrhuae DSM 1307	AOMC00000000
Halococcus saccharolyticus DSM 5350	AOMD00000000
Halococcus salifodinae DSM 8989	AOME00000000
Halococcus thailandensis JCM 13552	AOMF00000000
Haloferax alexandrinus JCM 10717	AOLL00000000
Haloferax denitrificans ATCC 35960	AOLP00000000
Haloferax elongans ATCC BAA-1513	AOLK00000000
Haloferax gibonsii ATCC 33959	AOLJ00000000
Haloferax larsenii JCM 13917	AOLI00000000
Haloferax lucentense DSM 14919	AOLH00000000
Haloferax mediterranei ATCC 33500	AOLO00000000
Haloferax mucosum ATCC BAA-1512	AOLN00000000
Haloferax prahovense DSM 18310	AOLG00000000
Haloferax sp. ATCC BAA-644	AOLF00000000
Haloferax sp. ATCC BAA-645	AOLE00000000
Haloferax sp. ATCC BAA-646	AOLD00000000
Haloferax sulfurifontis ATCC BAA-897	AOLM00000000
Haloferax volcanii DS2 DSM 3757	CP001953.1-CP001957.1
Haloferax volcanii DS2	AOHU00000000
Halogeometricum borinquense DSM 11551	CP01690.1-CP01695.1
Halogeometricum borinquense	AOHT00000000
Halomicrobium mukohataei	CP001688.1, CP001689.1
Halopiger xanaduensis	CP002839.1-CP002842.1
Haloquadratum walsbyi	AM180088.1, AM180089.1
Halorhabdus utahensis	CP001687.1
Halorubrum aidingense JCM 13560	AOJI00000000
Halorubrum arcis JCM 13916	AOJJ00000000
Halorubrum californiensis DSM 19288	AOJK00000000
Halorubrum coriense DSM 10284	AOJL00000000
Halorubrum distributum JCM 10118	AOJN00000000
Halorubrum distributum JCM 9100	AOJM00000000
Halorubrum hochstenium ATCC 700873	AOJO00000000
Halorubrum kocurii JCM 14978	AOJH00000000
Halorubrum lacusprofundi	CP001365.1-CP001367.1
Halorubrum lipolyticum DSM 21995	AOJG00000000
Halorubrum litoreum JCM 13561	AOJF00000000
Halorubrum saccharovorum DSM 1137	AOJE00000000
Halorubrum tebenquichense DSM 14210	AOJD00000000
Halorubrum terrestre JCM 10247	AOIW00000000
Halosarcina pallida JCM 14848	AOIV00000000
Halosimplex carlsbadense 2-9-1	AOIU00000000
Haloterrigena limicola JCM 13563	AOIT00000000
Haloterrigena salina JCM 13891	AOIS00000000
Haloterrigena thermotolerans DSM 11522	AOIR00000000
Haloterrigena turkmenica	CP001860.1-CP001866.1
Halovivax asiaticus JCM 14624	AOIQ00000000
Natrialba aegyptia DSM 13077	AOIP00000000
Natrialba asiatica DSM 12278	AOIO00000000
Natrialba chahannaoensis JCM 10990	AOIN00000000
Natrialba hulunbeirensis JCM 10989	AOIM00000000
Natrialba magadii ATCC 43099	AOHS00000000
Natrialba magadii DSM 3394	CP001932.1
Natrialba taiwanensis DSM 12281	AOIL00000000
Natrinema altunense JCM 12890	AOIK00000000
Natrinema gari JCM 14663	AOIJ00000000
Natrinema pallidum DSM 3751	AOII00000000
Natrinema pellirubrum DSM 15624	AOIE00000000
Natrinema versiforme JCM 10478	AOID00000000
Natronobacterium gregoryi SP2	AOIC00000000
Natronococcus amylolyticus DSM 10524	AOIB00000000
Natronococcus jeotgali DSM 18795	AOIA00000000
Natronolimnobius innermongolicus JCM 12255	AOHZ00000000
Natronomonas pharaonis	NC_007426
Natronorubrum bangense JCM 10635	AOHY00000000
Natronorubrum sulfidifaciens JCM 14089	AOHX00000000
Natronorubrum tibetense GA33	AOHW00000000
