# Supplementary material for: The Exploration of Novel Regulatory Relationships Drives Haloarchaeal Operon-Like Structural Dynamics over Short Evolutionary Distances
Source: Microorganisms. 2020 Nov 30;8(12):1900. doi: 10.3390/microorganisms8121900 (PMC7760734; doi:10.3390/microorganisms8121900)
Supplement: Supplementary file 1 [file microorganisms-08-01900-s001.zip › S9_Table_GeneOrderChanges_PS.xlsx]

## Sheet: GeneOrder
Search Query	Grp	ST (Switch Type)	Notes	# SS (Simple Switch)	# CS (Complex Switch)	# LR (Large Reordering)
3 $$ 484	1	SS	Simple Switch, 2 genes	1	0	0
7 $$ 1267	2	SS	Simple Switch, 5 genes, head – tail	1	0	0
105 $$ 4861	3	SS	Simple Switch, 2 genes	1	0	0
146 $$ 1252	4	CS	Switch combined with birth/death event	0	1	0
183 $$ 2970	5	CS	Switch combined with birth/death event	0	1	0
1267 $$ 2199	2	SS	Simple Switch, 5 genes, head – tail	1	0	0
1267 $$ 2224	2	SS	Simple Switch, 5 genes, head – tail	1	0	0
1267 $$ 2267	2	SS	Simple Switch, 5 genes, head – tail	1	0	0
1421 $$ 2565	6	SS	Simple Switch, 2 genes	1	0	0
1431 $$ 10938	7	CS	Switch combined with birth/death event OR local duplication and loss (unclear)	0	1	0
2994 $$ 10312	8	CS	Switch combined with birth/death event	0	1	0
3356 $$ 5237	9	CS	Switch combined with birth/death event	0	1	0
64 $$ 3124	10	CS	Comp Switch, 3 genes, head-tail, with birth/death event	0	1	0
49 $$ 1442	11	SS	Simple Switch, 3 genes	1	0	0
86 $$ 1442	11	SS	Simple Switch, 3 genes	1	0	0
1053 $$ 1295	12	LR	Large Operon Reordering (Cobalamin)	0	0	1
229 $$ 4114	13	SS	Simple Switch, 3 genes	1	0	0
749 $$ 1295	12	LR	Large Operon Reordering (Cobalamin)	0	0	1
1054 $$ 1295	12	LR	Large Operon Reordering (Cobalamin)	0	0	1
31 $$ 2904	13	LR	Large Operon Reordering (ABC Transporter)	0	0	1
71 $$ 1685	14	SS	Simple Switch, 2 genes	1	0	0
331 $$ 5681	15	CS	Switch combined with birth/death event	0	1	0
860 $$ 1161	16	SS	Simple Switch, 3 genes	1	0	0
1680 $$ 4266	17	LR	Large Operon Reordering (Carbon Monoxide Dehydrogenase)	0	0	1
2518 $$ 4266	17	LR	Large Operon Reordering (Carbon Monoxide Dehydrogenase)	0	0	1
972 $$ 1051	12	LR	Large Operon Reordering (Cobalamin)	0	0	1
1680 $$ 2518	17	LR	Large Operon Reordering (Carbon Monoxide Dehydrogenase)	0	0	1
972 $$ 1052	12	LR	Large Operon Reordering (Cobalamin)	0	0	1
233 $$ 1788	18	CS	Simple Switch combined with birth/death event (very often a simple switch)	0	1	0
15 $$ 364	19	CS	Switch combined with local duplication and loss	0	1	0
330 $$ 1054	12	LR	Large Operon Reordering (Cobalamin)	0	0	1
930 $$ 1054	12	LR	Large Operon Reordering (Cobalamin)	0	0	1
1052 $$ 1054	12	LR	Large Operon Reordering (Cobalamin)	0	0	1
1051 $$ 1054	12	LR	Large Operon Reordering (Cobalamin)	0	0	1
1054 $$ 1196	12	LR	Large Operon Reordering (Cobalamin)	0	0	1
392 $$ 675	20	CS	Switch combined with birth/death event	0	1	0
675 $$ 1479	20	CS	Switch combined with birth/death event	0	1	0
1051 $$ 1053	12	LR	Large Operon Reordering (Cobalamin)	0	0	1
1053 $$ 1196	12	LR	Large Operon Reordering (Cobalamin)	0	0	1
330 $$ 1053	12	LR	Large Operon Reordering (Cobalamin)	0	0	1
930 $$ 1053	12	LR	Large Operon Reordering (Cobalamin)	0	0	1
1052 $$ 1053	12	LR	Large Operon Reordering (Cobalamin)	0	0	1
749 $$ 1051	12	LR	Large Operon Reordering (Cobalamin)	0	0	1
749 $$ 1196	12	LR	Large Operon Reordering (Cobalamin)	0	0	1
330 $$ 749	12	LR	Large Operon Reordering (Cobalamin)	0	0	1
749 $$ 930	12	LR	Large Operon Reordering (Cobalamin)	0	0	1
749 $$ 1052	12	LR	Large Operon Reordering (Cobalamin)	0	0	1
309 $$ 364	19	CS	Switch combined with local duplication and loss	0	1	0
972 $$ 1295	12	LR	Large Operon Reordering (Cobalamin)	0	0	1
235 $$ 309	19	CS	Switch combined with local duplication and loss	0	1	0
Total of 20 distinct "operon groups", in various forms
Type		Abbreviation	Counts
Simple Switch		SS	12
Complex Switch		CS	13
Large Reordering		LR	25
Total		Simple	12
		Complex	38
Note that LR is a variety of a complex switch: an example of gene rearrangement coordinated with operon modification
