# Supplementary material for: The Exploration of Novel Regulatory Relationships Drives Haloarchaeal Operon-Like Structural Dynamics over Short Evolutionary Distances
Source: Microorganisms. 2020 Nov 30;8(12):1900. doi: 10.3390/microorganisms8121900 (PMC7760734; doi:10.3390/microorganisms8121900)
Supplement: Supplementary file 1 [file microorganisms-08-01900-s001.zip › S10_Clust_866_1119_Seq_and_Align.txt]

####
AllGaps_Alignment.txt CLUSTAL 2.1 multiple sequence alignment


Halorubrum_saccharovorum            --------------------------------------------------
Natronobacterium_gregoryi           --------------------------------------------------
Haloferax_elongans                  --------------------------------------------------
Halobiforma_nitratireducens         --------------------------------------------------
Natronorubrum_tibetense             GGGCAGGTGACGCAGCTCCTGCTCAGACGGATGATCGATATGCCAGAACT 50
Halorubrum_distributum              --------------------------------------------------
Halorubrum_distributum_JCM_101      --------------------------------------------------
Halorubrum_litoreum                 --------------------------------------------------
Halorubrum_terrestre                --------------------------------------------------
Halorubrum_coriense                 --------------------------------------------------
Halovivax_asiaticus                 --------------------------------------------------
Halosimplex_carlsbadense            --------------------------------------------------
Halorubrum_lacusprofundi            --------------------------------------------------
Halorubrum_kocurii                  --------------------------------------------------
Halorubrum_aidingense               --------------------------------------------------
Halococcus_saccharolyticus          --------------------------------------------------
Haloferax_alexandrinus              --------------------------------------------------
Halorubrum_tebenquichense           --------------------------------------------------
Haloferax_lucentense                --------------------------------------------------
Halorubrum_californiensis           --------------------------------------------------
Halorubrum_hochstenium              --------------------------------------------------
Haloferax_volcanii                  --------------------------------------------------
Natronorubrum_sulfidifaciens        --------------------------------------------------
Haloferax_mucosum                   --------------------------------------------------
Halococcus_thailandensis            --------------------------------------------------
Haloferax_larsenii                  --------------------------------------------------
Halogeometricum_borinquense         --------------------------------------------------
Halogeometricum_borinquense_DS      --------------------------------------------------
Haloferax_volcanii_DS2_DSM_375      --------------------------------------------------
Halosarcina_pallida                 --------------------------------------------------
Haloferax_gibonsii                  --------------------------------------------------
Haloferax_prahovense                --------------------------------------------------
Haloferax_sulfurifontis             --------------------------------------------------
Haloferax_sp_GUBF-1                 --------------------------------------------------
Haloferax_sp_GUBF-2                 --------------------------------------------------
Haloferax_sp_GUBF-3                 --------------------------------------------------
Haloferax_denitrificans             --------------------------------------------------
Haloferax_mediterranei              --------------------------------------------------
                                                                                      

Halorubrum_saccharovorum            --------------------------------------------------
Natronobacterium_gregoryi           --------------------------------------------------
Haloferax_elongans                  --------------------------------------------------
Halobiforma_nitratireducens         --------------------------------------------------
Natronorubrum_tibetense             GGTCAGTATCCCATCATGACGAACACGATAATATAGGAGATCAATCCAAA 100
Halorubrum_distributum              --------------------------------------------------
Halorubrum_distributum_JCM_101      --------------------------------------------------
Halorubrum_litoreum                 --------------------------------------------------
Halorubrum_terrestre                --------------------------------------------------
Halorubrum_coriense                 --------------------------------------------------
Halovivax_asiaticus                 --------------------------------------------------
Halosimplex_carlsbadense            --------------------------------------------------
Halorubrum_lacusprofundi            --------------------------------------------------
Halorubrum_kocurii                  --------------------------------------------------
Halorubrum_aidingense               --------------------------------------------------
Halococcus_saccharolyticus          --------------------------------------------------
Haloferax_alexandrinus              --------------------------------------------------
Halorubrum_tebenquichense           --------------------------------------------------
Haloferax_lucentense                --------------------------------------------------
Halorubrum_californiensis           --------------------------------------------------
Halorubrum_hochstenium              --------------------------------------------------
Haloferax_volcanii                  --------------------------------------------------
Natronorubrum_sulfidifaciens        --------------------------------------------------
Haloferax_mucosum                   --------------------------------------------------
Halococcus_thailandensis            --------------------------------------------------
Haloferax_larsenii                  --------------------------------------------------
Halogeometricum_borinquense         --------------------------------------------------
Halogeometricum_borinquense_DS      --------------------------------------------------
Haloferax_volcanii_DS2_DSM_375      --------------------------------------------------
Halosarcina_pallida                 --------------------------------------------------
Haloferax_gibonsii                  --------------------------------------------------
Haloferax_prahovense                --------------------------------------------------
Haloferax_sulfurifontis             --------------------------------------------------
Haloferax_sp_GUBF-1                 --------------------------------------------------
Haloferax_sp_GUBF-2                 --------------------------------------------------
Haloferax_sp_GUBF-3                 --------------------------------------------------
Haloferax_denitrificans             --------------------------------------------------
Haloferax_mediterranei              --------------------------------------------------
                                                                                      

Halorubrum_saccharovorum            --------------------------------------------------
Natronobacterium_gregoryi           --------------------------------------------------
Haloferax_elongans                  --------------------------------------------------
Halobiforma_nitratireducens         --------------------------------------------------
Natronorubrum_tibetense             GATGGCGGTGACCCCCAGCCAGACGAAGACTATGAGAACTGCCTGTCTGC 150
Halorubrum_distributum              --------------------------------------------------
Halorubrum_distributum_JCM_101      --------------------------------------------------
Halorubrum_litoreum                 --------------------------------------------------
Halorubrum_terrestre                --------------------------------------------------
Halorubrum_coriense                 --------------------------------------------------
Halovivax_asiaticus                 --------------------------------------------------
Halosimplex_carlsbadense            --------------------------------------------------
Halorubrum_lacusprofundi            --------------------------------------------------
Halorubrum_kocurii                  --------------------------------------------------
Halorubrum_aidingense               --------------------------------------------------
Halococcus_saccharolyticus          --------------------------------------------------
Haloferax_alexandrinus              --------------------------------------------------
Halorubrum_tebenquichense           --------------------------------------------------
Haloferax_lucentense                --------------------------------------------------
Halorubrum_californiensis           --------------------------------------------------
Halorubrum_hochstenium              --------------------------------------------------
Haloferax_volcanii                  --------------------------------------------------
Natronorubrum_sulfidifaciens        --------------------------------------------------
Haloferax_mucosum                   --------------------------------------------------
Halococcus_thailandensis            --------------------------------------------------
Haloferax_larsenii                  --------------------------------------------------
Halogeometricum_borinquense         --------------------------------------------------
Halogeometricum_borinquense_DS      --------------------------------------------------
Haloferax_volcanii_DS2_DSM_375      --------------------------------------------------
Halosarcina_pallida                 --------------------------------------------------
Haloferax_gibonsii                  --------------------------------------------------
Haloferax_prahovense                --------------------------------------------------
Haloferax_sulfurifontis             --------------------------------------------------
Haloferax_sp_GUBF-1                 --------------------------------------------------
Haloferax_sp_GUBF-2                 --------------------------------------------------
Haloferax_sp_GUBF-3                 --------------------------------------------------
Haloferax_denitrificans             --------------------------------------------------
Haloferax_mediterranei              --------------------------------------------------
                                                                                      

Halorubrum_saccharovorum            --------------------------------------------------
Natronobacterium_gregoryi           --------------------------------------------------
Haloferax_elongans                  --------------------------------------------------
Halobiforma_nitratireducens         --------------------------------------------------
Natronorubrum_tibetense             CGGTCATTCCCTCTCCATCGAGGATTGTACTAAATTGGGCAAGGACATCG 200
Halorubrum_distributum              --------------------------------------------------
Halorubrum_distributum_JCM_101      --------------------------------------------------
Halorubrum_litoreum                 --------------------------------------------------
Halorubrum_terrestre                --------------------------------------------------
Halorubrum_coriense                 --------------------------------------------------
Halovivax_asiaticus                 --------------------------------------------------
Halosimplex_carlsbadense            --------------------------------------------------
Halorubrum_lacusprofundi            --------------------------------------------------
Halorubrum_kocurii                  --------------------------------------------------
Halorubrum_aidingense               --------------------------------------------------
Halococcus_saccharolyticus          --------------------------------------------------
Haloferax_alexandrinus              --------------------------------------------------
Halorubrum_tebenquichense           --------------------------------------------------
Haloferax_lucentense                --------------------------------------------------
Halorubrum_californiensis           --------------------------------------------------
Halorubrum_hochstenium              --------------------------------------------------
Haloferax_volcanii                  --------------------------------------------------
Natronorubrum_sulfidifaciens        --------------------------------------------------
Haloferax_mucosum                   --------------------------------------------------
Halococcus_thailandensis            --------------------------------------------------
Haloferax_larsenii                  --------------------------------------------------
Halogeometricum_borinquense         --------------------------------------------------
Halogeometricum_borinquense_DS      --------------------------------------------------
Haloferax_volcanii_DS2_DSM_375      --------------------------------------------------
Halosarcina_pallida                 --------------------------------------------------
Haloferax_gibonsii                  --------------------------------------------------
Haloferax_prahovense                --------------------------------------------------
Haloferax_sulfurifontis             --------------------------------------------------
Haloferax_sp_GUBF-1                 --------------------------------------------------
Haloferax_sp_GUBF-2                 --------------------------------------------------
Haloferax_sp_GUBF-3                 --------------------------------------------------
Haloferax_denitrificans             --------------------------------------------------
Haloferax_mediterranei              --------------------------------------------------
                                                                                      

Halorubrum_saccharovorum            --------------------------------------------------
Natronobacterium_gregoryi           --------------------------------------------------
Haloferax_elongans                  --------------------------------------------------
Halobiforma_nitratireducens         --------------------------------------------------
Natronorubrum_tibetense             TCTCCCCTCATAATTGGGCTTAGTTGGTAATATGTAAAACGTTACTTGAT 250
Halorubrum_distributum              --------------------------------------------------
Halorubrum_distributum_JCM_101      --------------------------------------------------
Halorubrum_litoreum                 --------------------------------------------------
Halorubrum_terrestre                --------------------------------------------------
Halorubrum_coriense                 --------------------------------------------------
Halovivax_asiaticus                 --------------------------------------------------
Halosimplex_carlsbadense            --------------------------------------------------
Halorubrum_lacusprofundi            --------------------------------------------------
Halorubrum_kocurii                  --------------------------------------------------
Halorubrum_aidingense               --------------------------------------------------
Halococcus_saccharolyticus          --------------------------------------------------
Haloferax_alexandrinus              --------------------------------------------------
Halorubrum_tebenquichense           --------------------------------------------------
Haloferax_lucentense                --------------------------------------------------
Halorubrum_californiensis           --------------------------------------------------
Halorubrum_hochstenium              --------------------------------------------------
Haloferax_volcanii                  --------------------------------------------------
Natronorubrum_sulfidifaciens        --------------------------------------------------
Haloferax_mucosum                   --------------------------------------------------
Halococcus_thailandensis            --------------------------------------------------
Haloferax_larsenii                  --------------------------------------------------
Halogeometricum_borinquense         --------------------------------------------------
Halogeometricum_borinquense_DS      --------------------------------------------------
Haloferax_volcanii_DS2_DSM_375      --------------------------------------------------
Halosarcina_pallida                 --------------------------------------------------
Haloferax_gibonsii                  --------------------------------------------------
Haloferax_prahovense                --------------------------------------------------
Haloferax_sulfurifontis             --------------------------------------------------
Haloferax_sp_GUBF-1                 --------------------------------------------------
Haloferax_sp_GUBF-2                 --------------------------------------------------
Haloferax_sp_GUBF-3                 --------------------------------------------------
Haloferax_denitrificans             --------------------------------------------------
Haloferax_mediterranei              --------------------------------------------------
                                                                                      

Halorubrum_saccharovorum            --------------------------------------------------
Natronobacterium_gregoryi           --------------------------------------------------
Haloferax_elongans                  --------------------------------------------------
Halobiforma_nitratireducens         --------------------------------------------------
Natronorubrum_tibetense             TTTTGGGCGATAGTAGCCACTGGATATCACTGAACACCCGATCACAGAAC 300
Halorubrum_distributum              --------------------------------------------------
Halorubrum_distributum_JCM_101      --------------------------------------------------
Halorubrum_litoreum                 --------------------------------------------------
Halorubrum_terrestre                --------------------------------------------------
Halorubrum_coriense                 --------------------------------------------------
Halovivax_asiaticus                 --------------------------------------------------
Halosimplex_carlsbadense            --------------------------------------------------
Halorubrum_lacusprofundi            --------------------------------------------------
Halorubrum_kocurii                  --------------------------------------------------
Halorubrum_aidingense               --------------------------------------------------
Halococcus_saccharolyticus          --------------------------------------------------
Haloferax_alexandrinus              --------------------------------------------------
Halorubrum_tebenquichense           --------------------------------------------------
Haloferax_lucentense                --------------------------------------------------
Halorubrum_californiensis           --------------------------------------------------
Halorubrum_hochstenium              --------------------------------------------------
Haloferax_volcanii                  --------------------------------------------------
Natronorubrum_sulfidifaciens        --------------------------------------------------
Haloferax_mucosum                   --------------------------------------------------
Halococcus_thailandensis            --------------------------------------------------
Haloferax_larsenii                  --------------------------------------------------
Halogeometricum_borinquense         --------------------------------------------------
Halogeometricum_borinquense_DS      --------------------------------------------------
Haloferax_volcanii_DS2_DSM_375      --------------------------------------------------
Halosarcina_pallida                 --------------------------------------------------
Haloferax_gibonsii                  -----------------------------------TCCATGTCTGAACCG 15
Haloferax_prahovense                -----------------------------------CTCATGTCTGAACCC 15
Haloferax_sulfurifontis             -----------------------------------TTCATGACTGACAAA 15
Haloferax_sp_GUBF-1                 ----------------------------------TCCAATGACTGAACAA 16
Haloferax_sp_GUBF-2                 ----------------------------------TCCAATGACTGAACAA 16
Haloferax_sp_GUBF-3                 ----------------------------------TCCAATGACTGAACAA 16
Haloferax_denitrificans             -----------------------------------TCCATGACTGACTCA 15
Haloferax_mediterranei              --------------TTCTCGATGAGTAACACCGATTCTACGACCGAACCC 36
                                                                                      

Halorubrum_saccharovorum            --------------------------------------------------
Natronobacterium_gregoryi           --------------------------------------------------
Haloferax_elongans                  --------------------------------------------------
Halobiforma_nitratireducens         --------------------------------------------------
Natronorubrum_tibetense             AGCGTTGCGATCGGTGTGTGAATCGTTTTCTAGAGATGATTGTTCAGTGC 350
Halorubrum_distributum              --------------------------------------------------
Halorubrum_distributum_JCM_101      --------------------------------------------------
Halorubrum_litoreum                 --------------------------------------------------
Halorubrum_terrestre                --------------------------------------------------
Halorubrum_coriense                 --------------------------------------------------
Halovivax_asiaticus                 --------------------------------------------------
Halosimplex_carlsbadense            --------------------------------------------------
Halorubrum_lacusprofundi            --------------------------------------------------
Halorubrum_kocurii                  --------------------------------------------------
Halorubrum_aidingense               --------------------------------------------------
Halococcus_saccharolyticus          --------------------------------------------------
Haloferax_alexandrinus              --------------------------------------------------
Halorubrum_tebenquichense           --------------------------------------------------
Haloferax_lucentense                --------------------------------------------------
Halorubrum_californiensis           --------------------------------------------------
Halorubrum_hochstenium              --------------------------------------------------
Haloferax_volcanii                  --------------------------------------------------
Natronorubrum_sulfidifaciens        -----------------CCGCGTCGCTACCCCGACCG-----TCTCT--- 25
Haloferax_mucosum                   --------------------------------------------------
Halococcus_thailandensis            --------TCCATAGTTGATGATGCTTTAGACACGCC-----ACAGC--- 34
Haloferax_larsenii                  --------------------------------------------------
Halogeometricum_borinquense         ----------------TCTGTCTCAGAGACTCGTCAGCAGTTTTTCG--- 31
Halogeometricum_borinquense_DS      ----------------TCTGTCTCAGAGACTCGTCAGCAGTTTTTCG--- 31
Haloferax_volcanii_DS2_DSM_375      -------------------------------------------TTC---- 3
Halosarcina_pallida                 -------------------------GGTTCCCG------------CG--- 10
Haloferax_gibonsii                  CTCTCAGTCGGCGTCCTCGGCTACCGCTTCAGGCCCACCTTTTTGCGGTT 65
Haloferax_prahovense                CTCAAAATCGGCGTTCTCGGCTACCGCTTCAGGCCCACCTTTTTGCGGTT 65
Haloferax_sulfurifontis             CTTTCCGTCGGCGTCCTCGGTTACCGCTTCAGGCCCACCTTTTTCCGGTT 65
Haloferax_sp_GUBF-1                 CTCTCTATCGGCGTCCTCGGCTCCCGATTCAGGCCCACCTTTTTCCGGTT 66
Haloferax_sp_GUBF-2                 CTCTCTATCGGCGTCCTCGGCTCCCGATTCAGGCCCACCTTTTTCCGGTT 66
Haloferax_sp_GUBF-3                 CTCTCTATCGGCGTCCTCGGCTCCCGATTCAGGCCCACCTTTTTCCGGTT 66
Haloferax_denitrificans             CTCAAAATCGGCGTCCTCGGCTACCGCTTCAGGCCCACCTTTTTCCGGTT 65
Haloferax_mediterranei              CTCAAAATCGGCGTCCTCGGCTACCGATTCAGGCCCACCTTTTTCCGGTT 86
                                                                                      

Halorubrum_saccharovorum            --------------------------------------------------
Natronobacterium_gregoryi           -------------------------CG-----------CGATAGACACG- 13
Haloferax_elongans                  --------------------------------------------------
Halobiforma_nitratireducens         -------------------------CG--A---CCCCTCGCAAG-CACA- 18
Natronorubrum_tibetense             GCACGTCGACTGTGCACGTATTCCTCG--AGTGCCCCACGGAAAACTCCC 398
Halorubrum_distributum              --------------------------------------------------
Halorubrum_distributum_JCM_101      --------------------------------------------------
Halorubrum_litoreum                 --------------------------------------------------
Halorubrum_terrestre                --------------------------------------------------
Halorubrum_coriense                 --------------------------------------------------
Halovivax_asiaticus                 GGGCGTCGG---------------ACG--AAAGGCGGGAAATAGACTGGT 33
Halosimplex_carlsbadense            ---------------------------------------------ACC-- 3
Halorubrum_lacusprofundi            -----------------------G-CG----------GAGGATAAACCAA 16
Halorubrum_kocurii                  -----------------------GACG----------GAGG--------- 8
Halorubrum_aidingense               -------------------------------------GCGG------CGG 7
Halococcus_saccharolyticus          ---------------TCGAACCCGACGCGATTCCGACGCGGAGCCCTCGG 35
Haloferax_alexandrinus              --------------------------------------------------
Halorubrum_tebenquichense           --------------------------------------------------
Haloferax_lucentense                --------------------------------------------------
Halorubrum_californiensis           -----------------------GACG----------CTGA------CGA 11
Halorubrum_hochstenium              -----------------------GGCG----------GCGG------CGA 11
Haloferax_volcanii                  ----------------------TTC------------------------- 3
Natronorubrum_sulfidifaciens        -CGAGTCG-------------ATTCATCACGGATCGTGAGA---CTGTCA 58
Haloferax_mucosum                   ----------------------TTCTGT---------------------- 6
Halococcus_thailandensis            -CGTGATG-------------GTTCTGTGGTCGTCGTTTCA---CGACTA 67
Haloferax_larsenii                  ----------------------TTCTGC---------------------- 6
Halogeometricum_borinquense         -GGATACAGTGT--------ATCTCCTCAATGGAGGAGAGCGGACCGTCG 72
Halogeometricum_borinquense_DS      -GGATACAGTGT--------ATCTCCTCAATGGAGGAGAGCGGACCGTCG 72
Haloferax_volcanii_DS2_DSM_375      --------------------------------------------------
Halosarcina_pallida                 -GGAGACG--------------CTCC-------CGGGGAAC------TCG 32
Haloferax_gibonsii                  CGGGGCCGCTTCGCGACCCGCTCTCCCCAAAAATCTGGACCAAAAAGTGC 115
Haloferax_prahovense                CGGGGCCGCTTCGCGACCCGCTCACCCCAAAAATCTGGACCAAAAAGTGC 115
Haloferax_sulfurifontis             CGGGGCCGCGTCGCGACCCGCTCACCCCAAAAATATGGACCAAAAACTGC 115
Haloferax_sp_GUBF-1                 CGGGGCCGCTCCGCGACCCGCTCACCGGAAAAATCTGGACCAAAAAACGC 116
Haloferax_sp_GUBF-2                 CGGGGCCGCTCCGCGACCCGCTCACCGGAAAAATCTGGACCAAAAAACGC 116
Haloferax_sp_GUBF-3                 CGGGGCCGCTCCGCGACCCGCTCACCGGAAAAATCTGGACCAAAAAACGC 116
Haloferax_denitrificans             CGGGGCCGCTTCGCGACCCGCTCACCGCAAAAATCTGGGCCAAAAACTGC 115
Haloferax_mediterranei              CGGGGCCGCTTCGTGGCCCGCTCACCGGAAAAATCTGGACCAAAAAGTGC 136
                                                                                      

Halorubrum_saccharovorum            -------------------AACC--------------------------- 4
Natronobacterium_gregoryi           --ACGAAG---------AAAACCGCTACC-TACGACA------------- 38
Haloferax_elongans                  --------------------------------------------------
Halobiforma_nitratireducens         --GCGAAG---------ACAACTACTACC-GACGCCACTC---------- 46
Natronorubrum_tibetense             TCGCGACG---------AAAACCACTAAC-TACACTCGTT---------- 428
Halorubrum_distributum              ----GGCG---------GCGACCGCGAT--AATCC--------------- 20
Halorubrum_distributum_JCM_101      ----GGCG---------GCGACCGCGAT--AATCCAT------------- 22
Halorubrum_litoreum                 ----GGCG---------GCGACCGCGAT--AATCCAT------------- 22
Halorubrum_terrestre                ----GGCG---------GCGACCGCGA---AATCCAC------------- 21
Halorubrum_coriense                 ----GGCG---------GCGACCGCGG---AACGCA-------------- 20
Halovivax_asiaticus                 TGCCGGCTG-----TGAATAATTGCTAACTGTCGCGTCGG---------- 68
Halosimplex_carlsbadense            --------------------------------------------------
Halorubrum_lacusprofundi            TGACACAG----------CAACCACTACGAATCGGCGTACT--------- 47
Halorubrum_kocurii                  -------G----------CAACC-CA------------------------ 16
Halorubrum_aidingense               -----ACA----------CACCA--------------------------- 15
Halococcus_saccharolyticus          -----CCA----------CACCCGCTCCAACCCGGAGAACTAAGGCGACA 70
Haloferax_alexandrinus              --------------------TCCA-------------------------- 4
Halorubrum_tebenquichense           ----GGG-----------GATCCAC-AC---------------------- 12
Haloferax_lucentense                --------------------TCCA-------------------------- 4
Halorubrum_californiensis           --CCGAGA----------GATCCACGACA--------------------- 28
Halorubrum_hochstenium              --CCAACA----------GATCCACGAC---------------------- 27
Haloferax_volcanii                  --------------------------------------------------
Natronorubrum_sulfidifaciens        CTCGTG--------ACGAAAAGCACTAA-----CTACACCTAT------- 88
Haloferax_mucosum                   --------------------------------------------------
Halococcus_thailandensis            GGGCCA--------ACCTATCCTGCCAG-----TGTCGCGTGC------- 97
Haloferax_larsenii                  --------------------------------------------------
Halogeometricum_borinquense         CAAAAGGTTGCTGGACATGAAACGCTAAG---CCGTCGCCG--------- 110
Halogeometricum_borinquense_DS      CAAAAGGTTGCTGGACATGAAACGCTAAG---CCGTCGCCG--------- 110
Haloferax_volcanii_DS2_DSM_375      --------------------------------------------------
Halosarcina_pallida                 --ACAG--------ATATGAAACGCTAAG---CCGCCACCG--------- 60
Haloferax_gibonsii                  CGCGAGACTCGGCCTCCGGCCTCGCCCGCGGTACCGCATCGGG------- 158
Haloferax_prahovense                CGCGAGACTCGGCCTCCGGCCTCGCCCGCGGTACCGCATCGGG------- 158
Haloferax_sulfurifontis             CGCGAGACTCGGCCTCCGGCCTCGCTCGCGGTACCGCATCGGG------- 158
Haloferax_sp_GUBF-1                 CGCGAGACTCGGCCTCCGGCCTCGCTCGCGGTACTGCATCGGC------- 159
Haloferax_sp_GUBF-2                 CGCGAGACTCGGCCTCCGGCCTCGCTCGCGGTACTGCATCGGC------- 159
Haloferax_sp_GUBF-3                 CGCGAGACTCGGCCTCCGGCCTCGCTCGCGGTACTGCATCGGC------- 159
Haloferax_denitrificans             CGCGAGACTCGGCCGCCGGCCTCGCTCGCGGTACTGCACTGGT------- 158
Haloferax_mediterranei              CACGAGACTCGGCCTTCGGCCTCGCTCGCGGTACTGAATCGGC------- 179
                                                                                      

Halorubrum_saccharovorum            --------------------------------------------------
Natronobacterium_gregoryi           ---------ACTGACA-CT------------------------------- 47
Haloferax_elongans                  -------------ACAACG------------------------------- 6
Halobiforma_nitratireducens         ------GTAACCGACAACGT------------------------------ 60
Natronorubrum_tibetense             ------GTGAACGAGTACGT------------------------------ 442
Halorubrum_distributum              --------------------------------------------------
Halorubrum_distributum_JCM_101      ------------GACA---------------------------------- 26
Halorubrum_litoreum                 ------------GACA---------------------------------- 26
Halorubrum_terrestre                ------------GACA---------------------------------- 25
Halorubrum_coriense                 ------------GACA---------------------------------- 24
Halovivax_asiaticus                 ------CGAAGCGTCCGC-------------------------------- 80
Halosimplex_carlsbadense            --------------------------------------------------
Halorubrum_lacusprofundi            -------GGGGTACCG-CTT--C--------------------------- 60
Halorubrum_kocurii                  --------------------------------------------------
Halorubrum_aidingense               --------------------------------------------------
Halococcus_saccharolyticus          TCGGGTGTGGGTGCCGACATGGCA-------------------------- 94
Haloferax_alexandrinus              --------------------------------------------------
Halorubrum_tebenquichense           --------------------------------------------------
Haloferax_lucentense                --------------------------------------------------
Halorubrum_californiensis           --------------------------------------------------
Halorubrum_hochstenium              --------------------------------------------------
Haloferax_volcanii                  --------------------------------------------------
Natronorubrum_sulfidifaciens        ----TGTGAATGAGTGTGT------------------------------- 103
Haloferax_mucosum                   --------------------------------------------------
Halococcus_thailandensis            ----TCCTCATGAGGGCAAGCGGTTGCCTTTGGTCCCGACAGGGACCGTG 143
Haloferax_larsenii                  --------------------------------------------------
Halogeometricum_borinquense         ----TGAGAACCGCTCACT------------------------------- 125
Halogeometricum_borinquense_DS      ----TGAGAACCGCTCACT------------------------------- 125
Haloferax_volcanii_DS2_DSM_375      --------------------------------------------------
Halosarcina_pallida                 ----CGTGAAGCGGGGGC-------------------------------- 74
Haloferax_gibonsii                  ----CACGGAGGTGGCGCA------------------------------- 173
Haloferax_prahovense                ----CACGGAGGTGGCGCA------------------------------- 173
Haloferax_sulfurifontis             ----CACGGAGGTGGCGCA------------------------------- 173
Haloferax_sp_GUBF-1                 ----CACGGAGGTGGCACA------------------------------- 174
Haloferax_sp_GUBF-2                 ----CACGGAGGTGGCACA------------------------------- 174
Haloferax_sp_GUBF-3                 ----CACGGAGGTGGCACA------------------------------- 174
Haloferax_denitrificans             ----CACGGAGGCGGCACA------------------------------- 173
Haloferax_mediterranei              ----TGGTGGGGTGACACA------------------------------- 194
                                                                                      

Halorubrum_saccharovorum            --------------------------------------------------
Natronobacterium_gregoryi           --------------------------------------------------
Haloferax_elongans                  --------------------------------------------------
Halobiforma_nitratireducens         --------------------------------------------------
Natronorubrum_tibetense             --------------------------------------------------
Halorubrum_distributum              --------------------------------------------------
Halorubrum_distributum_JCM_101      --------------------------------------------------
Halorubrum_litoreum                 --------------------------------------------------
Halorubrum_terrestre                --------------------------------------------------
Halorubrum_coriense                 --------------------------------------------------
Halovivax_asiaticus                 --------------------------------------------------
Halosimplex_carlsbadense            --------------------------------------------------
Halorubrum_lacusprofundi            --------------------------------------------------
Halorubrum_kocurii                  --------------------------------------------------
Halorubrum_aidingense               --------------------------------------------------
Halococcus_saccharolyticus          --------------------------------------------------
Haloferax_alexandrinus              --------------------------------------------------
Halorubrum_tebenquichense           --------------------------------------------------
Haloferax_lucentense                --------------------------------------------------
Halorubrum_californiensis           --------------------------------------------------
Halorubrum_hochstenium              --------------------------------------------------
Haloferax_volcanii                  --------------------------------------------------
Natronorubrum_sulfidifaciens        --------------------------------------------------
Haloferax_mucosum                   --------------------------------------------------
Halococcus_thailandensis            AGGTACCGTGATATGGATGCGAACACTAGAACTGCTGGAAGATGAGGTTG 193
Haloferax_larsenii                  --------------------------------------------------
Halogeometricum_borinquense         --------------------------------------------------
Halogeometricum_borinquense_DS      --------------------------------------------------
Haloferax_volcanii_DS2_DSM_375      --------------------------------------------------
Halosarcina_pallida                 --------------------------------------------------
Haloferax_gibonsii                  --------------------------------------------------
Haloferax_prahovense                --------------------------------------------------
Haloferax_sulfurifontis             --------------------------------------------------
Haloferax_sp_GUBF-1                 --------------------------------------------------
Haloferax_sp_GUBF-2                 --------------------------------------------------
Haloferax_sp_GUBF-3                 --------------------------------------------------
Haloferax_denitrificans             --------------------------------------------------
Haloferax_mediterranei              --------------------------------------------------
                                                                                      

Halorubrum_saccharovorum            --------------------------------------------------
Natronobacterium_gregoryi           --------------------------------------------------
Haloferax_elongans                  --------------------------------------------------
Halobiforma_nitratireducens         --------------------------------------------------
Natronorubrum_tibetense             --------------------------------------------------
Halorubrum_distributum              --------------------------------------------------
Halorubrum_distributum_JCM_101      --------------------------------------------------
Halorubrum_litoreum                 --------------------------------------------------
Halorubrum_terrestre                --------------------------------------------------
Halorubrum_coriense                 --------------------------------------------------
Halovivax_asiaticus                 --------------------------------------------------
Halosimplex_carlsbadense            --------------------------------------------------
Halorubrum_lacusprofundi            --------------------------------------------------
Halorubrum_kocurii                  --------------------------------------------------
Halorubrum_aidingense               --------------------------------------------------
Halococcus_saccharolyticus          --------------------------------------------------
Haloferax_alexandrinus              --------------------------------------------------
Halorubrum_tebenquichense           --------------------------------------------------
Haloferax_lucentense                --------------------------------------------------
Halorubrum_californiensis           --------------------------------------------------
Halorubrum_hochstenium              --------------------------------------------------
Haloferax_volcanii                  --------------------------------------------------
Natronorubrum_sulfidifaciens        --------------------------------------------------
Haloferax_mucosum                   --------------------------------------------------
Halococcus_thailandensis            CGCTAATTTTGCATCCTTTAGATGTGGTCATGACTCTGCTTGCGCTCGAA 243
Haloferax_larsenii                  --------------------------------------------------
Halogeometricum_borinquense         --------------------------------------------------
Halogeometricum_borinquense_DS      --------------------------------------------------
Haloferax_volcanii_DS2_DSM_375      --------------------------------------------------
Halosarcina_pallida                 --------------------------------------------------
Haloferax_gibonsii                  --------------------------------------------------
Haloferax_prahovense                --------------------------------------------------
Haloferax_sulfurifontis             --------------------------------------------------
Haloferax_sp_GUBF-1                 --------------------------------------------------
Haloferax_sp_GUBF-2                 --------------------------------------------------
Haloferax_sp_GUBF-3                 --------------------------------------------------
Haloferax_denitrificans             --------------------------------------------------
Haloferax_mediterranei              --------------------------------------------------
                                                                                      

Halorubrum_saccharovorum            --------------------------------------------------
Natronobacterium_gregoryi           --------------------------------------------------
Haloferax_elongans                  --------------------------------------------------
Halobiforma_nitratireducens         --------------------------------------------------
Natronorubrum_tibetense             --------------------------------------------------
Halorubrum_distributum              --------------------------------------------------
Halorubrum_distributum_JCM_101      --------------------------------------------------
Halorubrum_litoreum                 --------------------------------------------------
Halorubrum_terrestre                --------------------------------------------------
Halorubrum_coriense                 --------------------------------------------------
Halovivax_asiaticus                 --------------------------------------------------
Halosimplex_carlsbadense            --------------------------------------------------
Halorubrum_lacusprofundi            --------------------------------------------------
Halorubrum_kocurii                  --------------------------------------------------
Halorubrum_aidingense               --------------------------------------------------
Halococcus_saccharolyticus          --------------------------------------------------
Haloferax_alexandrinus              --------------------------------------------------
Halorubrum_tebenquichense           --------------------------------------------------
Haloferax_lucentense                --------------------------------------------------
Halorubrum_californiensis           --------------------------------------------------
Halorubrum_hochstenium              --------------------------------------------------
Haloferax_volcanii                  --------------------------------------------------
Natronorubrum_sulfidifaciens        --------------------------------------------------
Haloferax_mucosum                   --------------------------------------------------
Halococcus_thailandensis            CTCGTGTACGGCGTATAATTAGGGGCGTATCCTATTAGTGAGAATTCATC 293
Haloferax_larsenii                  --------------------------------------------------
Halogeometricum_borinquense         --------------------------------------------------
Halogeometricum_borinquense_DS      --------------------------------------------------
Haloferax_volcanii_DS2_DSM_375      --------------------------------------------------
Halosarcina_pallida                 --------------------------------------------------
Haloferax_gibonsii                  --------------------------------------------------
Haloferax_prahovense                --------------------------------------------------
Haloferax_sulfurifontis             --------------------------------------------------
Haloferax_sp_GUBF-1                 --------------------------------------------------
Haloferax_sp_GUBF-2                 --------------------------------------------------
Haloferax_sp_GUBF-3                 --------------------------------------------------
Haloferax_denitrificans             --------------------------------------------------
Haloferax_mediterranei              --------------------------------------------------
                                                                                      

Halorubrum_saccharovorum            --------------------------------------------------
Natronobacterium_gregoryi           --------------------------------------------------
Haloferax_elongans                  --------------------------------------------------
Halobiforma_nitratireducens         --------------------------------------------------
Natronorubrum_tibetense             --------------------------------------------------
Halorubrum_distributum              --------------------------------------------------
Halorubrum_distributum_JCM_101      --------------------------------------------------
Halorubrum_litoreum                 --------------------------------------------------
Halorubrum_terrestre                --------------------------------------------------
Halorubrum_coriense                 --------------------------------------------------
Halovivax_asiaticus                 --------------------------------------------------
Halosimplex_carlsbadense            --------------------------------------------------
Halorubrum_lacusprofundi            --------------------------------------------------
Halorubrum_kocurii                  --------------------------------------------------
Halorubrum_aidingense               --------------------------------------------------
Halococcus_saccharolyticus          --------------------------------------------------
Haloferax_alexandrinus              --------------------------------------------------
Halorubrum_tebenquichense           --------------------------------------------------
Haloferax_lucentense                --------------------------------------------------
Halorubrum_californiensis           --------------------------------------------------
Halorubrum_hochstenium              --------------------------------------------------
Haloferax_volcanii                  --------------------------------------------------
Natronorubrum_sulfidifaciens        --------------------------------------------------
Haloferax_mucosum                   --------------------------------------------------
Halococcus_thailandensis            CGATGTACTGGGTTAGCATCCGTGAATTCGATCGTATCCGGAGAGGGGGA 343
Haloferax_larsenii                  --------------------------------------------------
Halogeometricum_borinquense         --------------------------------------------------
Halogeometricum_borinquense_DS      --------------------------------------------------
Haloferax_volcanii_DS2_DSM_375      --------------------------------------------------
Halosarcina_pallida                 --------------------------------------------------
Haloferax_gibonsii                  --------------------------------------------------
Haloferax_prahovense                --------------------------------------------------
Haloferax_sulfurifontis             --------------------------------------------------
Haloferax_sp_GUBF-1                 --------------------------------------------------
Haloferax_sp_GUBF-2                 --------------------------------------------------
Haloferax_sp_GUBF-3                 --------------------------------------------------
Haloferax_denitrificans             --------------------------------------------------
Haloferax_mediterranei              --------------------------------------------------
                                                                                      

Halorubrum_saccharovorum            --------------------------------------------------
Natronobacterium_gregoryi           --------------------------------------------------
Haloferax_elongans                  --------------------------------------------------
Halobiforma_nitratireducens         --------------------------------------------------
Natronorubrum_tibetense             --------------------------------------------------
Halorubrum_distributum              --------------------------------------------------
Halorubrum_distributum_JCM_101      --------------------------------------------------
Halorubrum_litoreum                 --------------------------------------------------
Halorubrum_terrestre                --------------------------------------------------
Halorubrum_coriense                 --------------------------------------------------
Halovivax_asiaticus                 --------------------------------------------------
Halosimplex_carlsbadense            --------------------------------------------------
Halorubrum_lacusprofundi            --------------------------------------------------
Halorubrum_kocurii                  --------------------------------------------------
Halorubrum_aidingense               --------------------------------------------------
Halococcus_saccharolyticus          --------------------------------------------------
Haloferax_alexandrinus              --------------------------------------------------
Halorubrum_tebenquichense           --------------------------------------------------
Haloferax_lucentense                --------------------------------------------------
Halorubrum_californiensis           --------------------------------------------------
Halorubrum_hochstenium              --------------------------------------------------
Haloferax_volcanii                  --------------------------------------------------
Natronorubrum_sulfidifaciens        --------------------------------------------------
Haloferax_mucosum                   --------------------------------------------------
Halococcus_thailandensis            CGGTTCTAACACTATTTCACTTCGTCTCTAGCCTAGAGGTTTATATCTCT 393
Haloferax_larsenii                  --------------------------------------------------
Halogeometricum_borinquense         --------------------------------------------------
Halogeometricum_borinquense_DS      --------------------------------------------------
Haloferax_volcanii_DS2_DSM_375      --------------------------------------------------
Halosarcina_pallida                 --------------------------------------------------
Haloferax_gibonsii                  --------------------------------------------------
Haloferax_prahovense                --------------------------------------------------
Haloferax_sulfurifontis             --------------------------------------------------
Haloferax_sp_GUBF-1                 --------------------------------------------------
Haloferax_sp_GUBF-2                 --------------------------------------------------
Haloferax_sp_GUBF-3                 --------------------------------------------------
Haloferax_denitrificans             --------------------------------------------------
Haloferax_mediterranei              --------------------------------------------------
                                                                                      

Halorubrum_saccharovorum            --------------------------------------------------
Natronobacterium_gregoryi           --------------------------------------------------
Haloferax_elongans                  --------------------------------------------------
Halobiforma_nitratireducens         --------------------------------------------------
Natronorubrum_tibetense             --------------------------------------------------
Halorubrum_distributum              --------------------------------------------------
Halorubrum_distributum_JCM_101      --------------------------------------------------
Halorubrum_litoreum                 --------------------------------------------------
Halorubrum_terrestre                --------------------------------------------------
Halorubrum_coriense                 --------------------------------------------------
Halovivax_asiaticus                 --------------------------------------------------
Halosimplex_carlsbadense            --------------------------------------------------
Halorubrum_lacusprofundi            --------------------------------------------------
Halorubrum_kocurii                  --------------------------------------------------
Halorubrum_aidingense               --------------------------------------------------
Halococcus_saccharolyticus          --------------------------------------------------
Haloferax_alexandrinus              --------------------------------------------------
Halorubrum_tebenquichense           --------------------------------------------------
Haloferax_lucentense                --------------------------------------------------
Halorubrum_californiensis           --------------------------------------------------
Halorubrum_hochstenium              --------------------------------------------------
Haloferax_volcanii                  --------------------------------------------------
Natronorubrum_sulfidifaciens        --------------------------------------------------
Haloferax_mucosum                   --------------------------------------------------
Halococcus_thailandensis            GGAAGTATTTGGCTACTCTAGAGTTATGAGAAAAACTCTAGAAATCTCAG 443
Haloferax_larsenii                  --------------------------------------------------
Halogeometricum_borinquense         --------------------------------------------------
Halogeometricum_borinquense_DS      --------------------------------------------------
Haloferax_volcanii_DS2_DSM_375      --------------------------------------------------
Halosarcina_pallida                 --------------------------------------------------
Haloferax_gibonsii                  --------------------------------------------------
Haloferax_prahovense                --------------------------------------------------
Haloferax_sulfurifontis             --------------------------------------------------
Haloferax_sp_GUBF-1                 --------------------------------------------------
Haloferax_sp_GUBF-2                 --------------------------------------------------
Haloferax_sp_GUBF-3                 --------------------------------------------------
Haloferax_denitrificans             --------------------------------------------------
Haloferax_mediterranei              --------------------------------------------------
                                                                                      

Halorubrum_saccharovorum            --------------------------------------------------
Natronobacterium_gregoryi           --------------------------------------------------
Haloferax_elongans                  --------------------------------------------------
Halobiforma_nitratireducens         --------------------------------------------------
Natronorubrum_tibetense             --------------------------------------------------
Halorubrum_distributum              --------------------------------------------------
Halorubrum_distributum_JCM_101      --------------------------------------------------
Halorubrum_litoreum                 --------------------------------------------------
Halorubrum_terrestre                --------------------------------------------------
Halorubrum_coriense                 --------------------------------------------------
Halovivax_asiaticus                 --------------------------------------------------
Halosimplex_carlsbadense            --------------------------------------------------
Halorubrum_lacusprofundi            --------------------------------------------------
Halorubrum_kocurii                  --------------------------------------------------
Halorubrum_aidingense               --------------------------------------------------
Halococcus_saccharolyticus          --------------------------------------------------
Haloferax_alexandrinus              --------------------------------------------------
Halorubrum_tebenquichense           --------------------------------------------------
Haloferax_lucentense                --------------------------------------------------
Halorubrum_californiensis           --------------------------------------------------
Halorubrum_hochstenium              --------------------------------------------------
Haloferax_volcanii                  --------------------------------------------------
Natronorubrum_sulfidifaciens        --------------------------------------------------
Haloferax_mucosum                   --------------------------------------------------
Halococcus_thailandensis            ATGAGACCTTCGACACACTCAATGAACTTGGAGGTACATTCGATACCCTT 493
Haloferax_larsenii                  --------------------------------------------------
Halogeometricum_borinquense         --------------------------------------------------
Halogeometricum_borinquense_DS      --------------------------------------------------
Haloferax_volcanii_DS2_DSM_375      --------------------------------------------------
Halosarcina_pallida                 --------------------------------------------------
Haloferax_gibonsii                  --------------------------------------------------
Haloferax_prahovense                --------------------------------------------------
Haloferax_sulfurifontis             --------------------------------------------------
Haloferax_sp_GUBF-1                 --------------------------------------------------
Haloferax_sp_GUBF-2                 --------------------------------------------------
Haloferax_sp_GUBF-3                 --------------------------------------------------
Haloferax_denitrificans             --------------------------------------------------
Haloferax_mediterranei              --------------------------------------------------
                                                                                      

Halorubrum_saccharovorum            --------------------------------------------------
Natronobacterium_gregoryi           --------------------------------------------------
Haloferax_elongans                  --------------------------------------------------
Halobiforma_nitratireducens         --------------------------------------------------
Natronorubrum_tibetense             --------------------------------------------------
Halorubrum_distributum              --------------------------------------------------
Halorubrum_distributum_JCM_101      --------------------------------------------------
Halorubrum_litoreum                 --------------------------------------------------
Halorubrum_terrestre                --------------------------------------------------
Halorubrum_coriense                 --------------------------------------------------
Halovivax_asiaticus                 --------------------------------------------------
Halosimplex_carlsbadense            --------------------------------------------------
Halorubrum_lacusprofundi            --------------------------------------------------
Halorubrum_kocurii                  --------------------------------------------------
Halorubrum_aidingense               --------------------------------------------------
Halococcus_saccharolyticus          --------------------------------------------------
Haloferax_alexandrinus              --------------------------------------------------
Halorubrum_tebenquichense           --------------------------------------------------
Haloferax_lucentense                --------------------------------------------------
Halorubrum_californiensis           --------------------------------------------------
Halorubrum_hochstenium              --------------------------------------------------
Haloferax_volcanii                  --------------------------------------------------
Natronorubrum_sulfidifaciens        --------------------------------------------------
Haloferax_mucosum                   --------------------------------------------------
Halococcus_thailandensis            GATGAAGTACTTCAAAAACTAATTCGCGATGCAGGGCACGAAGAATTACT 543
Haloferax_larsenii                  --------------------------------------------------
Halogeometricum_borinquense         --------------------------------------------------
Halogeometricum_borinquense_DS      --------------------------------------------------
Haloferax_volcanii_DS2_DSM_375      --------------------------------------------------
Halosarcina_pallida                 --------------------------------------------------
Haloferax_gibonsii                  --------------------------------------------------
Haloferax_prahovense                --------------------------------------------------
Haloferax_sulfurifontis             --------------------------------------------------
Haloferax_sp_GUBF-1                 --------------------------------------------------
Haloferax_sp_GUBF-2                 --------------------------------------------------
Haloferax_sp_GUBF-3                 --------------------------------------------------
Haloferax_denitrificans             --------------------------------------------------
Haloferax_mediterranei              --------------------------------------------------
                                                                                      

Halorubrum_saccharovorum            --------------------------------------------------
Natronobacterium_gregoryi           --------------------------------------------------
Haloferax_elongans                  --------------------------------------------------
Halobiforma_nitratireducens         --------------------------------------------------
Natronorubrum_tibetense             --------------------------------------------------
Halorubrum_distributum              --------------------------------------------------
Halorubrum_distributum_JCM_101      --------------------------------------------------
Halorubrum_litoreum                 --------------------------------------------------
Halorubrum_terrestre                --------------------------------------------------
Halorubrum_coriense                 --------------------------------------------------
Halovivax_asiaticus                 --------------------------------------------------
Halosimplex_carlsbadense            --------------------------------------------------
Halorubrum_lacusprofundi            --------------------------------------------------
Halorubrum_kocurii                  --------------------------------------------------
Halorubrum_aidingense               --------------------------------------------------
Halococcus_saccharolyticus          --------------------------------------------------
Haloferax_alexandrinus              --------------------------------------------------
Halorubrum_tebenquichense           --------------------------------------------------
Haloferax_lucentense                --------------------------------------------------
Halorubrum_californiensis           --------------------------------------------------
Halorubrum_hochstenium              --------------------------------------------------
Haloferax_volcanii                  --------------------------------------------------
Natronorubrum_sulfidifaciens        --------------------------------------------------
Haloferax_mucosum                   --------------------------------------------------
Halococcus_thailandensis            CGACAAAGACAATGACGAAGAAGGAGATAACGGAAACTCCAACACCATGA 593
Haloferax_larsenii                  --------------------------------------------------
Halogeometricum_borinquense         --------------------------------------------------
Halogeometricum_borinquense_DS      --------------------------------------------------
Haloferax_volcanii_DS2_DSM_375      --------------------------------------------------
Halosarcina_pallida                 --------------------------------------------------
Haloferax_gibonsii                  --------------------------------------------------
Haloferax_prahovense                --------------------------------------------------
Haloferax_sulfurifontis             --------------------------------------------------
Haloferax_sp_GUBF-1                 --------------------------------------------------
Haloferax_sp_GUBF-2                 --------------------------------------------------
Haloferax_sp_GUBF-3                 --------------------------------------------------
Haloferax_denitrificans             --------------------------------------------------
Haloferax_mediterranei              --------------------------------------------------
                                                                                      

Halorubrum_saccharovorum            --------------------------------------------------
Natronobacterium_gregoryi           --------------------------------------------------
Haloferax_elongans                  --------------------------------------------------
Halobiforma_nitratireducens         --------------------------------------------------
Natronorubrum_tibetense             --------------------------------------------------
Halorubrum_distributum              --------------------------------------------------
Halorubrum_distributum_JCM_101      --------------------------------------------------
Halorubrum_litoreum                 --------------------------------------------------
Halorubrum_terrestre                --------------------------------------------------
Halorubrum_coriense                 --------------------------------------------------
Halovivax_asiaticus                 --------------------------------------------------
Halosimplex_carlsbadense            --------------------------------------------------
Halorubrum_lacusprofundi            --------------------------------------------------
Halorubrum_kocurii                  --------------------------------------------------
Halorubrum_aidingense               --------------------------------------------------
Halococcus_saccharolyticus          --------------------------------------------------
Haloferax_alexandrinus              --------------------------------------------------
Halorubrum_tebenquichense           --------------------------------------------------
Haloferax_lucentense                --------------------------------------------------
Halorubrum_californiensis           --------------------------------------------------
Halorubrum_hochstenium              --------------------------------------------------
Haloferax_volcanii                  --------------------------------------------------
Natronorubrum_sulfidifaciens        --------------------------------------------------
Haloferax_mucosum                   --------------------------------------------------
Halococcus_thailandensis            GTGCACATGATCGCAAGGAGAGGTTCATCAAATCTCTCAAAGAAGACGAG 643
Haloferax_larsenii                  --------------------------------------------------
Halogeometricum_borinquense         --------------------------------------------------
Halogeometricum_borinquense_DS      --------------------------------------------------
Haloferax_volcanii_DS2_DSM_375      --------------------------------------------------
Halosarcina_pallida                 --------------------------------------------------
Haloferax_gibonsii                  --------------------------------------------------
Haloferax_prahovense                --------------------------------------------------
Haloferax_sulfurifontis             --------------------------------------------------
Haloferax_sp_GUBF-1                 --------------------------------------------------
Haloferax_sp_GUBF-2                 --------------------------------------------------
Haloferax_sp_GUBF-3                 --------------------------------------------------
Haloferax_denitrificans             --------------------------------------------------
Haloferax_mediterranei              --------------------------------------------------
                                                                                      

Halorubrum_saccharovorum            --------------------------------------------------
Natronobacterium_gregoryi           --------------------------------------------------
Haloferax_elongans                  --------------------------------------------------
Halobiforma_nitratireducens         --------------------------------------------------
Natronorubrum_tibetense             --------------------------------------------------
Halorubrum_distributum              --------------------------------------------------
Halorubrum_distributum_JCM_101      --------------------------------------------------
Halorubrum_litoreum                 --------------------------------------------------
Halorubrum_terrestre                --------------------------------------------------
Halorubrum_coriense                 --------------------------------------------------
Halovivax_asiaticus                 --------------------------------------------------
Halosimplex_carlsbadense            --------------------------------------------------
Halorubrum_lacusprofundi            --------------------------------------------------
Halorubrum_kocurii                  --------------------------------------------------
Halorubrum_aidingense               --------------------------------------------------
Halococcus_saccharolyticus          --------------------------------------------------
Haloferax_alexandrinus              --------------------------------------------------
Halorubrum_tebenquichense           --------------------------------------------------
Haloferax_lucentense                --------------------------------------------------
Halorubrum_californiensis           --------------------------------------------------
Halorubrum_hochstenium              --------------------------------------------------
Haloferax_volcanii                  --------------------------------------------------
Natronorubrum_sulfidifaciens        --------------------------------------------------
Haloferax_mucosum                   --------------------------------------------------
Halococcus_thailandensis            CAAGTACTAAACGTAGAGAAAATCAAGCGCAGCGCCTGGAAAGTCAAAAC 693
Haloferax_larsenii                  --------------------------------------------------
Halogeometricum_borinquense         --------------------------------------------------
Halogeometricum_borinquense_DS      --------------------------------------------------
Haloferax_volcanii_DS2_DSM_375      --------------------------------------------------
Halosarcina_pallida                 --------------------------------------------------
Haloferax_gibonsii                  --------------------------------------------------
Haloferax_prahovense                --------------------------------------------------
Haloferax_sulfurifontis             --------------------------------------------------
Haloferax_sp_GUBF-1                 --------------------------------------------------
Haloferax_sp_GUBF-2                 --------------------------------------------------
Haloferax_sp_GUBF-3                 --------------------------------------------------
Haloferax_denitrificans             --------------------------------------------------
Haloferax_mediterranei              --------------------------------------------------
                                                                                      

Halorubrum_saccharovorum            --------------------------------------------------
Natronobacterium_gregoryi           --------------------------------------------------
Haloferax_elongans                  --------------------------------------------------
Halobiforma_nitratireducens         --------------------------------------------------
Natronorubrum_tibetense             --------------------------------------------------
Halorubrum_distributum              --------------------------------------------------
Halorubrum_distributum_JCM_101      --------------------------------------------------
Halorubrum_litoreum                 --------------------------------------------------
Halorubrum_terrestre                --------------------------------------------------
Halorubrum_coriense                 --------------------------------------------------
Halovivax_asiaticus                 --------------------------------------------------
Halosimplex_carlsbadense            --------------------------------------------------
Halorubrum_lacusprofundi            --------------------------------------------------
Halorubrum_kocurii                  --------------------------------------------------
Halorubrum_aidingense               --------------------------------------------------
Halococcus_saccharolyticus          --------------------------------------------------
Haloferax_alexandrinus              --------------------------------------------------
Halorubrum_tebenquichense           --------------------------------------------------
Haloferax_lucentense                --------------------------------------------------
Halorubrum_californiensis           --------------------------------------------------
Halorubrum_hochstenium              --------------------------------------------------
Haloferax_volcanii                  --------------------------------------------------
Natronorubrum_sulfidifaciens        --------------------------------------------------
Haloferax_mucosum                   --------------------------------------------------
Halococcus_thailandensis            TCGCAAGGGGAAAAAGATAGTTTGGATCCACTATCATTGTGATTTTGAAT 743
Haloferax_larsenii                  --------------------------------------------------
Halogeometricum_borinquense         --------------------------------------------------
Halogeometricum_borinquense_DS      --------------------------------------------------
Haloferax_volcanii_DS2_DSM_375      --------------------------------------------------
Halosarcina_pallida                 --------------------------------------------------
Haloferax_gibonsii                  --------------------------------------------------
Haloferax_prahovense                --------------------------------------------------
Haloferax_sulfurifontis             --------------------------------------------------
Haloferax_sp_GUBF-1                 --------------------------------------------------
Haloferax_sp_GUBF-2                 --------------------------------------------------
Haloferax_sp_GUBF-3                 --------------------------------------------------
Haloferax_denitrificans             --------------------------------------------------
Haloferax_mediterranei              --------------------------------------------------
                                                                                      

Halorubrum_saccharovorum            --------------------------------------------------
Natronobacterium_gregoryi           --------------------------------------------------
Haloferax_elongans                  --------------------------------------------------
Halobiforma_nitratireducens         --------------------------------------------------
Natronorubrum_tibetense             --------------------------------------------------
Halorubrum_distributum              --------------------------------------------------
Halorubrum_distributum_JCM_101      --------------------------------------------------
Halorubrum_litoreum                 --------------------------------------------------
Halorubrum_terrestre                --------------------------------------------------
Halorubrum_coriense                 --------------------------------------------------
Halovivax_asiaticus                 --------------------------------------------------
Halosimplex_carlsbadense            --------------------------------------------------
Halorubrum_lacusprofundi            --------------------------------------------------
Halorubrum_kocurii                  --------------------------------------------------
Halorubrum_aidingense               --------------------------------------------------
Halococcus_saccharolyticus          --------------------------------------------------
Haloferax_alexandrinus              --------------------------------------------------
Halorubrum_tebenquichense           --------------------------------------------------
Haloferax_lucentense                --------------------------------------------------
Halorubrum_californiensis           --------------------------------------------------
Halorubrum_hochstenium              --------------------------------------------------
Haloferax_volcanii                  --------------------------------------------------
Natronorubrum_sulfidifaciens        --------------------------------------------------
Haloferax_mucosum                   --------------------------------------------------
Halococcus_thailandensis            TCTTCGGAGGTTCCTGGGAAGTCAATCATAATCTTGAGGATCGGGGTGAT 793
Haloferax_larsenii                  --------------------------------------------------
Halogeometricum_borinquense         --------------------------------------------------
Halogeometricum_borinquense_DS      --------------------------------------------------
Haloferax_volcanii_DS2_DSM_375      --------------------------------------------------
Halosarcina_pallida                 --------------------------------------------------
Haloferax_gibonsii                  --------------------------------------------------
Haloferax_prahovense                --------------------------------------------------
Haloferax_sulfurifontis             --------------------------------------------------
Haloferax_sp_GUBF-1                 --------------------------------------------------
Haloferax_sp_GUBF-2                 --------------------------------------------------
Haloferax_sp_GUBF-3                 --------------------------------------------------
Haloferax_denitrificans             --------------------------------------------------
Haloferax_mediterranei              --------------------------------------------------
                                                                                      

Halorubrum_saccharovorum            --------------------------------------------------
Natronobacterium_gregoryi           --------------------------------------------------
Haloferax_elongans                  --------------------------------------------------
Halobiforma_nitratireducens         --------------------------------------------------
Natronorubrum_tibetense             --------------------------------------------------
Halorubrum_distributum              --------------------------------------------------
Halorubrum_distributum_JCM_101      --------------------------------------------------
Halorubrum_litoreum                 --------------------------------------------------
Halorubrum_terrestre                --------------------------------------------------
Halorubrum_coriense                 --------------------------------------------------
Halovivax_asiaticus                 --------------------------------------------------
Halosimplex_carlsbadense            --------------------------------------------------
Halorubrum_lacusprofundi            --------------------------------------------------
Halorubrum_kocurii                  --------------------------------------------------
Halorubrum_aidingense               --------------------------------------------------
Halococcus_saccharolyticus          --------------------------------------------------
Haloferax_alexandrinus              --------------------------------------------------
Halorubrum_tebenquichense           --------------------------------------------------
Haloferax_lucentense                --------------------------------------------------
Halorubrum_californiensis           --------------------------------------------------
Halorubrum_hochstenium              --------------------------------------------------
Haloferax_volcanii                  --------------------------------------------------
Natronorubrum_sulfidifaciens        --------------------------------------------------
Haloferax_mucosum                   --------------------------------------------------
Halococcus_thailandensis            CTGATTCATCTTTTCCTTGGACCTCAATCAGAAGACTACTATGTAGTCCC 843
Haloferax_larsenii                  --------------------------------------------------
Halogeometricum_borinquense         --------------------------------------------------
Halogeometricum_borinquense_DS      --------------------------------------------------
Haloferax_volcanii_DS2_DSM_375      --------------------------------------------------
Halosarcina_pallida                 --------------------------------------------------
Haloferax_gibonsii                  --------------------------------------------------
Haloferax_prahovense                --------------------------------------------------
Haloferax_sulfurifontis             --------------------------------------------------
Haloferax_sp_GUBF-1                 --------------------------------------------------
Haloferax_sp_GUBF-2                 --------------------------------------------------
Haloferax_sp_GUBF-3                 --------------------------------------------------
Haloferax_denitrificans             --------------------------------------------------
Haloferax_mediterranei              --------------------------------------------------
                                                                                      

Halorubrum_saccharovorum            --------------------------------------------------
Natronobacterium_gregoryi           --------------------------------------------------
Haloferax_elongans                  --------------------------------------------------
Halobiforma_nitratireducens         --------------------------------------------------
Natronorubrum_tibetense             --------------------------------------------------
Halorubrum_distributum              --------------------------------------------------
Halorubrum_distributum_JCM_101      --------------------------------------------------
Halorubrum_litoreum                 --------------------------------------------------
Halorubrum_terrestre                --------------------------------------------------
Halorubrum_coriense                 --------------------------------------------------
Halovivax_asiaticus                 --------------------------------------------------
Halosimplex_carlsbadense            --------------------------------------------------
Halorubrum_lacusprofundi            --------------------------------------------------
Halorubrum_kocurii                  --------------------------------------------------
Halorubrum_aidingense               --------------------------------------------------
Halococcus_saccharolyticus          --------------------------------------------------
Haloferax_alexandrinus              --------------------------------------------------
Halorubrum_tebenquichense           --------------------------------------------------
Haloferax_lucentense                --------------------------------------------------
Halorubrum_californiensis           --------------------------------------------------
Halorubrum_hochstenium              --------------------------------------------------
Haloferax_volcanii                  --------------------------------------------------
Natronorubrum_sulfidifaciens        --------------------------------------------------
Haloferax_mucosum                   --------------------------------------------------
Halococcus_thailandensis            AGACAGCGATCTCCACTCGGGGAAATTTGTGGTATATGATACAAAGGATG 893
Haloferax_larsenii                  --------------------------------------------------
Halogeometricum_borinquense         --------------------------------------------------
Halogeometricum_borinquense_DS      --------------------------------------------------
Haloferax_volcanii_DS2_DSM_375      --------------------------------------------------
Halosarcina_pallida                 --------------------------------------------------
Haloferax_gibonsii                  --------------------------------------------------
Haloferax_prahovense                --------------------------------------------------
Haloferax_sulfurifontis             --------------------------------------------------
Haloferax_sp_GUBF-1                 --------------------------------------------------
Haloferax_sp_GUBF-2                 --------------------------------------------------
Haloferax_sp_GUBF-3                 --------------------------------------------------
Haloferax_denitrificans             --------------------------------------------------
Haloferax_mediterranei              --------------------------------------------------
                                                                                      

Halorubrum_saccharovorum            --------------------------------------------------
Natronobacterium_gregoryi           --------------------------------------------------
Haloferax_elongans                  --------------------------------------------------
Halobiforma_nitratireducens         --------------------------------------------------
Natronorubrum_tibetense             --------------------------------------------------
Halorubrum_distributum              --------------------------------------------------
Halorubrum_distributum_JCM_101      --------------------------------------------------
Halorubrum_litoreum                 --------------------------------------------------
Halorubrum_terrestre                --------------------------------------------------
Halorubrum_coriense                 --------------------------------------------------
Halovivax_asiaticus                 --------------------------------------------------
Halosimplex_carlsbadense            --------------------------------------------------
Halorubrum_lacusprofundi            --------------------------------------------------
Halorubrum_kocurii                  --------------------------------------------------
Halorubrum_aidingense               --------------------------------------------------
Halococcus_saccharolyticus          --------------------------------------------------
Haloferax_alexandrinus              --------------------------------------------------
Halorubrum_tebenquichense           --------------------------------------------------
Haloferax_lucentense                --------------------------------------------------
Halorubrum_californiensis           --------------------------------------------------
Halorubrum_hochstenium              --------------------------------------------------
Haloferax_volcanii                  --------------------------------------------------
Natronorubrum_sulfidifaciens        --------------------------------------------------
Haloferax_mucosum                   --------------------------------------------------
Halococcus_thailandensis            GGGGTAACTGGAAATTCAGCACCAAACGTGGTGAGCCGAAAAATTTGGAA 943
Haloferax_larsenii                  --------------------------------------------------
Halogeometricum_borinquense         --------------------------------------------------
Halogeometricum_borinquense_DS      --------------------------------------------------
Haloferax_volcanii_DS2_DSM_375      --------------------------------------------------
Halosarcina_pallida                 --------------------------------------------------
Haloferax_gibonsii                  --------------------------------------------------
Haloferax_prahovense                --------------------------------------------------
Haloferax_sulfurifontis             --------------------------------------------------
Haloferax_sp_GUBF-1                 --------------------------------------------------
Haloferax_sp_GUBF-2                 --------------------------------------------------
Haloferax_sp_GUBF-3                 --------------------------------------------------
Haloferax_denitrificans             --------------------------------------------------
Haloferax_mediterranei              --------------------------------------------------
                                                                                      

Halorubrum_saccharovorum            --------------------------------------------------
Natronobacterium_gregoryi           --------------------------------------------------
Haloferax_elongans                  --------------------------------------------------
Halobiforma_nitratireducens         --------------------------------------------------
Natronorubrum_tibetense             --------------------------------------------------
Halorubrum_distributum              --------------------------------------------------
Halorubrum_distributum_JCM_101      --------------------------------------------------
Halorubrum_litoreum                 --------------------------------------------------
Halorubrum_terrestre                --------------------------------------------------
Halorubrum_coriense                 --------------------------------------------------
Halovivax_asiaticus                 --------------------------------------------------
Halosimplex_carlsbadense            --------------------------------------------------
Halorubrum_lacusprofundi            --------------------------------------------------
Halorubrum_kocurii                  --------------------------------------------------
Halorubrum_aidingense               --------------------------------------------------
Halococcus_saccharolyticus          --------------------------------------------------
Haloferax_alexandrinus              --------------------------------------------------
Halorubrum_tebenquichense           --------------------------------------------------
Haloferax_lucentense                --------------------------------------------------
Halorubrum_californiensis           --------------------------------------------------
Halorubrum_hochstenium              --------------------------------------------------
Haloferax_volcanii                  --------------------------------------------------
Natronorubrum_sulfidifaciens        --------------------------------------------------
Haloferax_mucosum                   --------------------------------------------------
Halococcus_thailandensis            GCGCTAGAATCTGAATATTCTAGTCTGGGTCTGATTACCAACTAATATTA 993
Haloferax_larsenii                  --------------------------------------------------
Halogeometricum_borinquense         --------------------------------------------------
Halogeometricum_borinquense_DS      --------------------------------------------------
Haloferax_volcanii_DS2_DSM_375      --------------------------------------------------
Halosarcina_pallida                 --------------------------------------------------
Haloferax_gibonsii                  --------------------------------------------------
Haloferax_prahovense                --------------------------------------------------
Haloferax_sulfurifontis             --------------------------------------------------
Haloferax_sp_GUBF-1                 --------------------------------------------------
Haloferax_sp_GUBF-2                 --------------------------------------------------
Haloferax_sp_GUBF-3                 --------------------------------------------------
Haloferax_denitrificans             --------------------------------------------------
Haloferax_mediterranei              --------------------------------------------------
                                                                                      

Halorubrum_saccharovorum            --------------------------------------------------
Natronobacterium_gregoryi           --------------------------------------------------
Haloferax_elongans                  --------------------------------------------------
Halobiforma_nitratireducens         --------------------------------------------------
Natronorubrum_tibetense             --------------------------------------------------
Halorubrum_distributum              --------------------------------------------------
Halorubrum_distributum_JCM_101      --------------------------------------------------
Halorubrum_litoreum                 --------------------------------------------------
Halorubrum_terrestre                --------------------------------------------------
Halorubrum_coriense                 --------------------------------------------------
Halovivax_asiaticus                 --------------------------------------------------
Halosimplex_carlsbadense            --------------------------------------------------
Halorubrum_lacusprofundi            --------------------------------------------------
Halorubrum_kocurii                  --------------------------------------------------
Halorubrum_aidingense               --------------------------------------------------
Halococcus_saccharolyticus          --------------------------------------------------
Haloferax_alexandrinus              --------------------------------------------------
Halorubrum_tebenquichense           --------------------------------------------------
Haloferax_lucentense                --------------------------------------------------
Halorubrum_californiensis           --------------------------------------------------
Halorubrum_hochstenium              --------------------------------------------------
Haloferax_volcanii                  --------------------------------------------------
Natronorubrum_sulfidifaciens        --------------------------------------------------
Haloferax_mucosum                   --------------------------------------------------
Halococcus_thailandensis            TGATCCTTGTGGCGATCGGAGGGTGCGGTTACGCATGAAGCCGCTGGGAG 1043
Haloferax_larsenii                  --------------------------------------------------
Halogeometricum_borinquense         --------------------------------------------------
Halogeometricum_borinquense_DS      --------------------------------------------------
Haloferax_volcanii_DS2_DSM_375      --------------------------------------------------
Halosarcina_pallida                 --------------------------------------------------
Haloferax_gibonsii                  --------------------------------------------------
Haloferax_prahovense                --------------------------------------------------
Haloferax_sulfurifontis             --------------------------------------------------
Haloferax_sp_GUBF-1                 --------------------------------------------------
Haloferax_sp_GUBF-2                 --------------------------------------------------
Haloferax_sp_GUBF-3                 --------------------------------------------------
Haloferax_denitrificans             --------------------------------------------------
Haloferax_mediterranei              --------------------------------------------------
                                                                                      

Halorubrum_saccharovorum            --------------------------------------------------
Natronobacterium_gregoryi           --------------------------------------------------
Haloferax_elongans                  --------------------------------------------------
Halobiforma_nitratireducens         --------------------------------------------------
Natronorubrum_tibetense             --------------------------------------------------
Halorubrum_distributum              --------------------------------------------------
Halorubrum_distributum_JCM_101      --------------------------------------------------
Halorubrum_litoreum                 --------------------------------------------------
Halorubrum_terrestre                --------------------------------------------------
Halorubrum_coriense                 --------------------------------------------------
Halovivax_asiaticus                 --------------------------------------------------
Halosimplex_carlsbadense            --------------------------------------------------
Halorubrum_lacusprofundi            --------------------------------------------------
Halorubrum_kocurii                  --------------------------------------------------
Halorubrum_aidingense               --------------------------------------------------
Halococcus_saccharolyticus          --------------------------------------------------
Haloferax_alexandrinus              --------------------------------------------------
Halorubrum_tebenquichense           --------------------------------------------------
Haloferax_lucentense                --------------------------------------------------
Halorubrum_californiensis           --------------------------------------------------
Halorubrum_hochstenium              --------------------------------------------------
Haloferax_volcanii                  --------------------------------------------------
Natronorubrum_sulfidifaciens        --------------------------------------------------
Haloferax_mucosum                   --------------------------------------------------
Halococcus_thailandensis            ACGATATTGTGACTACGATTCGCTCCAAGTATAGACTGTGACGTTCATCC 1093
Haloferax_larsenii                  --------------------------------------------------
Halogeometricum_borinquense         --------------------------------------------------
Halogeometricum_borinquense_DS      --------------------------------------------------
Haloferax_volcanii_DS2_DSM_375      --------------------------------------------------
Halosarcina_pallida                 --------------------------------------------------
Haloferax_gibonsii                  --------------------------------------------------
Haloferax_prahovense                --------------------------------------------------
Haloferax_sulfurifontis             --------------------------------------------------
Haloferax_sp_GUBF-1                 --------------------------------------------------
Haloferax_sp_GUBF-2                 --------------------------------------------------
Haloferax_sp_GUBF-3                 --------------------------------------------------
Haloferax_denitrificans             --------------------------------------------------
Haloferax_mediterranei              --------------------------------------------------
                                                                                      

Halorubrum_saccharovorum            --------------------------------------------------
Natronobacterium_gregoryi           --------------------------------------------------
Haloferax_elongans                  --------------------------------------------------
Halobiforma_nitratireducens         --------------------------------------------------
Natronorubrum_tibetense             --------------------------------------------------
Halorubrum_distributum              --------------------------------------------------
Halorubrum_distributum_JCM_101      --------------------------------------------------
Halorubrum_litoreum                 --------------------------------------------------
Halorubrum_terrestre                --------------------------------------------------
Halorubrum_coriense                 --------------------------------------------------
Halovivax_asiaticus                 --------------------------------------------------
Halosimplex_carlsbadense            --------------------------------------------------
Halorubrum_lacusprofundi            --------------------------------------------------
Halorubrum_kocurii                  --------------------------------------------------
Halorubrum_aidingense               --------------------------------------------------
Halococcus_saccharolyticus          --------------------------------------------------
Haloferax_alexandrinus              --------------------------------------------------
Halorubrum_tebenquichense           --------------------------------------------------
Haloferax_lucentense                --------------------------------------------------
Halorubrum_californiensis           --------------------------------------------------
Halorubrum_hochstenium              --------------------------------------------------
Haloferax_volcanii                  --------------------------------------------------
Natronorubrum_sulfidifaciens        --------------------------------------------------
Haloferax_mucosum                   --------------------------------------------------
Halococcus_thailandensis            GATGAGGACACTGAGCGCACGATGGTGCGACTTTTGGACCTCATACACGG 1143
Haloferax_larsenii                  --------------------------------------------------
Halogeometricum_borinquense         --------------------------------------------------
Halogeometricum_borinquense_DS      --------------------------------------------------
Haloferax_volcanii_DS2_DSM_375      --------------------------------------------------
Halosarcina_pallida                 --------------------------------------------------
Haloferax_gibonsii                  --------------------------------------------------
Haloferax_prahovense                --------------------------------------------------
Haloferax_sulfurifontis             --------------------------------------------------
Haloferax_sp_GUBF-1                 --------------------------------------------------
Haloferax_sp_GUBF-2                 --------------------------------------------------
Haloferax_sp_GUBF-3                 --------------------------------------------------
Haloferax_denitrificans             --------------------------------------------------
Haloferax_mediterranei              --------------------------------------------------
                                                                                      

Halorubrum_saccharovorum            --------------------------------------------------
Natronobacterium_gregoryi           --------------------------------------------------
Haloferax_elongans                  --------------------------------------------------
Halobiforma_nitratireducens         --------------------------------------------------
Natronorubrum_tibetense             --------------------------------------------------
Halorubrum_distributum              --------------------------------------------------
Halorubrum_distributum_JCM_101      --------------------------------------------------
Halorubrum_litoreum                 --------------------------------------------------
Halorubrum_terrestre                --------------------------------------------------
Halorubrum_coriense                 --------------------------------------------------
Halovivax_asiaticus                 --------------------------------------------------
Halosimplex_carlsbadense            --------------------------------------------------
Halorubrum_lacusprofundi            --------------------------------------------------
Halorubrum_kocurii                  --------------------------------------------------
Halorubrum_aidingense               --------------------------------------------------
Halococcus_saccharolyticus          --------------------------------------------------
Haloferax_alexandrinus              --------------------------------------------------
Halorubrum_tebenquichense           --------------------------------------------------
Haloferax_lucentense                --------------------------------------------------
Halorubrum_californiensis           --------------------------------------------------
Halorubrum_hochstenium              --------------------------------------------------
Haloferax_volcanii                  --------------------------------------------------
Natronorubrum_sulfidifaciens        --------------------------------------------------
Haloferax_mucosum                   --------------------------------------------------
Halococcus_thailandensis            TGCCACTCATCAACATACAAATTTATAGAACAATAATCAACCTAAATATA 1193
Haloferax_larsenii                  --------------------------------------------------
Halogeometricum_borinquense         --------------------------------------------------
Halogeometricum_borinquense_DS      --------------------------------------------------
Haloferax_volcanii_DS2_DSM_375      --------------------------------------------------
Halosarcina_pallida                 --------------------------------------------------
Haloferax_gibonsii                  --------------------------------------------------
Haloferax_prahovense                --------------------------------------------------
Haloferax_sulfurifontis             --------------------------------------------------
Haloferax_sp_GUBF-1                 --------------------------------------------------
Haloferax_sp_GUBF-2                 --------------------------------------------------
Haloferax_sp_GUBF-3                 --------------------------------------------------
Haloferax_denitrificans             --------------------------------------------------
Haloferax_mediterranei              --------------------------------------------------
                                                                                      

Halorubrum_saccharovorum            --------------------------------------------------
Natronobacterium_gregoryi           --------------------------------------------------
Haloferax_elongans                  --------------------------------------------------
Halobiforma_nitratireducens         --------------------------------------------------
Natronorubrum_tibetense             --------------------------------------------------
Halorubrum_distributum              --------------------------------------------------
Halorubrum_distributum_JCM_101      --------------------------------------------------
Halorubrum_litoreum                 --------------------------------------------------
Halorubrum_terrestre                --------------------------------------------------
Halorubrum_coriense                 --------------------------------------------------
Halovivax_asiaticus                 --------------------------------------------------
Halosimplex_carlsbadense            --------------------------------------------------
Halorubrum_lacusprofundi            --------------------------------------------------
Halorubrum_kocurii                  --------------------------------------------------
Halorubrum_aidingense               --------------------------------------------------
Halococcus_saccharolyticus          --------------------------------------------------
Haloferax_alexandrinus              --------------------------------------------------
Halorubrum_tebenquichense           --------------------------------------------------
Haloferax_lucentense                --------------------------------------------------
Halorubrum_californiensis           --------------------------------------------------
Halorubrum_hochstenium              --------------------------------------------------
Haloferax_volcanii                  --------------------------------------------------
Natronorubrum_sulfidifaciens        --------------------------------------------------
Haloferax_mucosum                   --------------------------------------------------
Halococcus_thailandensis            CTTTATTATAAATAATATATAAAATAAAATTATTTTTATAGTTTGTCGAG 1243
Haloferax_larsenii                  --------------------------------------------------
Halogeometricum_borinquense         --------------------------------------------------
Halogeometricum_borinquense_DS      --------------------------------------------------
Haloferax_volcanii_DS2_DSM_375      --------------------------------------------------
Halosarcina_pallida                 --------------------------------------------------
Haloferax_gibonsii                  --------------------------------------------------
Haloferax_prahovense                --------------------------------------------------
Haloferax_sulfurifontis             --------------------------------------------------
Haloferax_sp_GUBF-1                 --------------------------------------------------
Haloferax_sp_GUBF-2                 --------------------------------------------------
Haloferax_sp_GUBF-3                 --------------------------------------------------
Haloferax_denitrificans             --------------------------------------------------
Haloferax_mediterranei              --------------------------------------------------
                                                                                      

Halorubrum_saccharovorum            --------------------------------------------------
Natronobacterium_gregoryi           --------------------------------------------------
Haloferax_elongans                  --------------------------------------------------
Halobiforma_nitratireducens         --------------------------------------------------
Natronorubrum_tibetense             --------------------------------------------------
Halorubrum_distributum              --------------------------------------------------
Halorubrum_distributum_JCM_101      --------------------------------------------------
Halorubrum_litoreum                 --------------------------------------------------
Halorubrum_terrestre                --------------------------------------------------
Halorubrum_coriense                 --------------------------------------------------
Halovivax_asiaticus                 --------------------------------------------------
Halosimplex_carlsbadense            --------------------------------------------------
Halorubrum_lacusprofundi            --------------------------------------------------
Halorubrum_kocurii                  --------------------------------------------------
Halorubrum_aidingense               --------------------------------------------------
Halococcus_saccharolyticus          --------------------------------------------------
Haloferax_alexandrinus              --------------------------------------------------
Halorubrum_tebenquichense           --------------------------------------------------
Haloferax_lucentense                --------------------------------------------------
Halorubrum_californiensis           --------------------------------------------------
Halorubrum_hochstenium              --------------------------------------------------
Haloferax_volcanii                  --------------------------------------------------
Natronorubrum_sulfidifaciens        --------------------------------------------------
Haloferax_mucosum                   --------------------------------------------------
Halococcus_thailandensis            ATGAGGGATGGAGACGCATATGAAAGCATCATAGTTGTTGTCCGTCACTC 1293
Haloferax_larsenii                  --------------------------------------------------
Halogeometricum_borinquense         --------------------------------------------------
Halogeometricum_borinquense_DS      --------------------------------------------------
Haloferax_volcanii_DS2_DSM_375      --------------------------------------------------
Halosarcina_pallida                 --------------------------------------------------
Haloferax_gibonsii                  --------------------------------------------------
Haloferax_prahovense                --------------------------------------------------
Haloferax_sulfurifontis             --------------------------------------------------
Haloferax_sp_GUBF-1                 --------------------------------------------------
Haloferax_sp_GUBF-2                 --------------------------------------------------
Haloferax_sp_GUBF-3                 --------------------------------------------------
Haloferax_denitrificans             --------------------------------------------------
Haloferax_mediterranei              --------------------------------------------------
                                                                                      

Halorubrum_saccharovorum            --------------------------------------------------
Natronobacterium_gregoryi           --------------------------------------------------
Haloferax_elongans                  --------------------------------------------------
Halobiforma_nitratireducens         --------------------------------------------------
Natronorubrum_tibetense             --------------------------------------------------
Halorubrum_distributum              --------------------------------------------------
Halorubrum_distributum_JCM_101      --------------------------------------------------
Halorubrum_litoreum                 --------------------------------------------------
Halorubrum_terrestre                --------------------------------------------------
Halorubrum_coriense                 --------------------------------------------------
Halovivax_asiaticus                 --------------------------------------------------
Halosimplex_carlsbadense            --------------------------------------------------
Halorubrum_lacusprofundi            --------------------------------------------------
Halorubrum_kocurii                  --------------------------------------------------
Halorubrum_aidingense               --------------------------------------------------
Halococcus_saccharolyticus          --------------------------------------------------
Haloferax_alexandrinus              --------------------------------------------------
Halorubrum_tebenquichense           --------------------------------------------------
Haloferax_lucentense                --------------------------------------------------
Halorubrum_californiensis           --------------------------------------------------
Halorubrum_hochstenium              --------------------------------------------------
Haloferax_volcanii                  --------------------------------------------------
Natronorubrum_sulfidifaciens        --------------------------------------------------
Haloferax_mucosum                   --------------------------------------------------
Halococcus_thailandensis            GCTGACTGGCGCTGAACACTTACCCCGAAACCTAAGACGCCCTCGACTGT 1343
Haloferax_larsenii                  --------------------------------------------------
Halogeometricum_borinquense         --------------------------------------------------
Halogeometricum_borinquense_DS      --------------------------------------------------
Haloferax_volcanii_DS2_DSM_375      --------------------------------------------------
Halosarcina_pallida                 --------------------------------------------------
Haloferax_gibonsii                  --------------------------------------------------
Haloferax_prahovense                --------------------------------------------------
Haloferax_sulfurifontis             --------------------------------------------------
Haloferax_sp_GUBF-1                 --------------------------------------------------
Haloferax_sp_GUBF-2                 --------------------------------------------------
Haloferax_sp_GUBF-3                 --------------------------------------------------
Haloferax_denitrificans             --------------------------------------------------
Haloferax_mediterranei              --------------------------------------------------
                                                                                      

Halorubrum_saccharovorum            ---------
Natronobacterium_gregoryi           ---------
Haloferax_elongans                  ---------
Halobiforma_nitratireducens         ---------
Natronorubrum_tibetense             ---------
Halorubrum_distributum              ---------
Halorubrum_distributum_JCM_101      ---------
Halorubrum_litoreum                 ---------
Halorubrum_terrestre                ---------
Halorubrum_coriense                 ---------
Halovivax_asiaticus                 ---------
Halosimplex_carlsbadense            ---------
Halorubrum_lacusprofundi            ---------
Halorubrum_kocurii                  ---------
Halorubrum_aidingense               ---------
Halococcus_saccharolyticus          ---------
Haloferax_alexandrinus              ---------
Halorubrum_tebenquichense           ---------
Haloferax_lucentense                ---------
Halorubrum_californiensis           ---------
Halorubrum_hochstenium              ---------
Haloferax_volcanii                  ---------
Natronorubrum_sulfidifaciens        ---------
Haloferax_mucosum                   ---------
Halococcus_thailandensis            ACGCCCAAT 1352
Haloferax_larsenii                  ---------
Halogeometricum_borinquense         ---------
Halogeometricum_borinquense_DS      ---------
Haloferax_volcanii_DS2_DSM_375      ---------
Halosarcina_pallida                 ---------
Haloferax_gibonsii                  ---------
Haloferax_prahovense                ---------
Haloferax_sulfurifontis             ---------
Haloferax_sp_GUBF-1                 ---------
Haloferax_sp_GUBF-2                 ---------
Haloferax_sp_GUBF-3                 ---------
Haloferax_denitrificans             ---------
Haloferax_mediterranei              ---------
                                             

####
AllGaps_MinusThailandensis_Alignment.txt CLUSTAL 2.1 multiple sequence alignment


Halorubrum_saccharovorum            --------------------------------------------------
Natronobacterium_gregoryi           --------------------------------------------------
Haloferax_elongans                  --------------------------------------------------
Halobiforma_nitratireducens         --------------------------------------------------
Halorubrum_kocurii                  --------------------------------------------------
Halorubrum_lacusprofundi            --------------------------------------------------
Haloferax_gibonsii                  --------------------------------------------------
Haloferax_prahovense                --------------------------------------------------
Haloferax_sulfurifontis             --------------------------------------------------
Haloferax_sp_GUBF-1                 --------------------------------------------------
Haloferax_sp_GUBF-2                 --------------------------------------------------
Haloferax_sp_GUBF-3                 --------------------------------------------------
Haloferax_denitrificans             --------------------------------------------------
Haloferax_mediterranei              --------------------------------------------------
Halosimplex_carlsbadense            --------------------------------------------------
Halosarcina_pallida                 --------------------------------------------------
Halorubrum_distributum              --------------------------------------------------
Halorubrum_distributum_JCM_101      --------------------------------------------------
Halorubrum_litoreum                 --------------------------------------------------
Halorubrum_terrestre                --------------------------------------------------
Halorubrum_coriense                 --------------------------------------------------
Halorubrum_aidingense               --------------------------------------------------
Halococcus_saccharolyticus          --------------------------------------------------
Haloferax_alexandrinus              --------------------------------------------------
Halorubrum_tebenquichense           --------------------------------------------------
Haloferax_lucentense                --------------------------------------------------
Halorubrum_californiensis           --------------------------------------------------
Halorubrum_hochstenium              --------------------------------------------------
Haloferax_volcanii                  --------------------------------------------------
Natronorubrum_sulfidifaciens        --------------------------------------------------
Halogeometricum_borinquense         --------------------------------------------------
Halogeometricum_borinquense_DS      --------------------------------------------------
Haloferax_mucosum                   --------------------------------------------------
Haloferax_volcanii_DS2_DSM_375      --------------------------------------------------
Haloferax_larsenii                  --------------------------------------------------
Natronorubrum_tibetense             GGGCAGGTGACGCAGCTCCTGCTCAGACGGATGATCGATATGCCAGAACT 50
Halovivax_asiaticus                 --------------------------------------------------
                                                                                      

Halorubrum_saccharovorum            --------------------------------------------------
Natronobacterium_gregoryi           --------------------------------------------------
Haloferax_elongans                  --------------------------------------------------
Halobiforma_nitratireducens         --------------------------------------------------
Halorubrum_kocurii                  --------------------------------------------------
Halorubrum_lacusprofundi            --------------------------------------------------
Haloferax_gibonsii                  --------------------------------------------------
Haloferax_prahovense                --------------------------------------------------
Haloferax_sulfurifontis             --------------------------------------------------
Haloferax_sp_GUBF-1                 --------------------------------------------------
Haloferax_sp_GUBF-2                 --------------------------------------------------
Haloferax_sp_GUBF-3                 --------------------------------------------------
Haloferax_denitrificans             --------------------------------------------------
Haloferax_mediterranei              --------------------------------------------------
Halosimplex_carlsbadense            --------------------------------------------------
Halosarcina_pallida                 --------------------------------------------------
Halorubrum_distributum              --------------------------------------------------
Halorubrum_distributum_JCM_101      --------------------------------------------------
Halorubrum_litoreum                 --------------------------------------------------
Halorubrum_terrestre                --------------------------------------------------
Halorubrum_coriense                 --------------------------------------------------
Halorubrum_aidingense               --------------------------------------------------
Halococcus_saccharolyticus          --------------------------------------------------
Haloferax_alexandrinus              --------------------------------------------------
Halorubrum_tebenquichense           --------------------------------------------------
Haloferax_lucentense                --------------------------------------------------
Halorubrum_californiensis           --------------------------------------------------
Halorubrum_hochstenium              --------------------------------------------------
Haloferax_volcanii                  --------------------------------------------------
Natronorubrum_sulfidifaciens        --------------------------------------------------
Halogeometricum_borinquense         --------------------------------------------------
Halogeometricum_borinquense_DS      --------------------------------------------------
Haloferax_mucosum                   --------------------------------------------------
Haloferax_volcanii_DS2_DSM_375      --------------------------------------------------
Haloferax_larsenii                  --------------------------------------------------
Natronorubrum_tibetense             GGTCAGTATCCCATCATGACGAACACGATAATATAGGAGATCAATCCAAA 100
Halovivax_asiaticus                 --------------------------------------------------
                                                                                      

Halorubrum_saccharovorum            --------------------------------------------------
Natronobacterium_gregoryi           --------------------------------------------------
Haloferax_elongans                  --------------------------------------------------
Halobiforma_nitratireducens         --------------------------------------------------
Halorubrum_kocurii                  --------------------------------------------------
Halorubrum_lacusprofundi            --------------------------------------------------
Haloferax_gibonsii                  --------------------------------------------------
Haloferax_prahovense                --------------------------------------------------
Haloferax_sulfurifontis             --------------------------------------------------
Haloferax_sp_GUBF-1                 --------------------------------------------------
Haloferax_sp_GUBF-2                 --------------------------------------------------
Haloferax_sp_GUBF-3                 --------------------------------------------------
Haloferax_denitrificans             --------------------------------------------------
Haloferax_mediterranei              -------------------------------------------TTCTCGA 7
Halosimplex_carlsbadense            --------------------------------------------------
Halosarcina_pallida                 --------------------------------------------------
Halorubrum_distributum              --------------------------------------------------
Halorubrum_distributum_JCM_101      --------------------------------------------------
Halorubrum_litoreum                 --------------------------------------------------
Halorubrum_terrestre                --------------------------------------------------
Halorubrum_coriense                 --------------------------------------------------
Halorubrum_aidingense               --------------------------------------------------
Halococcus_saccharolyticus          ------------------------------------------------TC 2
Haloferax_alexandrinus              --------------------------------------------------
Halorubrum_tebenquichense           --------------------------------------------------
Haloferax_lucentense                --------------------------------------------------
Halorubrum_californiensis           --------------------------------------------------
Halorubrum_hochstenium              --------------------------------------------------
Haloferax_volcanii                  --------------------------------------------------
Natronorubrum_sulfidifaciens        --------------------------------------------------
Halogeometricum_borinquense         -----------------------------------------TCTGTCT-- 7
Halogeometricum_borinquense_DS      -----------------------------------------TCTGTCT-- 7
Haloferax_mucosum                   --------------------------------------------------
Haloferax_volcanii_DS2_DSM_375      --------------------------------------------------
Haloferax_larsenii                  --------------------------------------------------
Natronorubrum_tibetense             GATGGCGGTGACCCCCAGCCAGACGAAGACTATGAGAACTGCCTGTCTGC 150
Halovivax_asiaticus                 --------------------------------------------------
                                                                                      

Halorubrum_saccharovorum            --------------------------------------------------
Natronobacterium_gregoryi           ----------CG------CGATAGACACGA----------------CGAA 18
Haloferax_elongans                  --------------------------------------------------
Halobiforma_nitratireducens         ----------CGACCCCTCGCAAG-CACAG----------------CGAA 23
Halorubrum_kocurii                  ----------------GACGGAGG-------------------------- 8
Halorubrum_lacusprofundi            -----------------GCGGAGGATAAAC----------------CAAT 17
Haloferax_gibonsii                  --------------TCCATGTCTGAACCGCTCTCAG---------TCGGC 27
Haloferax_prahovense                --------------CTCATGTCTGAACCCCTCAAAA---------TCGGC 27
Haloferax_sulfurifontis             --------------TTCATGACTGACAAACTTTCCG---------TCGGC 27
Haloferax_sp_GUBF-1                 -------------TCCAATGACTGAACAACTCTCTA---------TCGGC 28
Haloferax_sp_GUBF-2                 -------------TCCAATGACTGAACAACTCTCTA---------TCGGC 28
Haloferax_sp_GUBF-3                 -------------TCCAATGACTGAACAACTCTCTA---------TCGGC 28
Haloferax_denitrificans             --------------TCCATGACTGACTCACTCAAAA---------TCGGC 27
Haloferax_mediterranei              TGAGTAACACCGATTCTACGACCGAACCCCTCAAAA---------TCGGC 48
Halosimplex_carlsbadense            --------------------------------------------------
Halosarcina_pallida                 -----------GGTTCC--CGCGGGAGACG---CTC---------CCGGG 25
Halorubrum_distributum              -----------G--------GCGG-------------------------- 5
Halorubrum_distributum_JCM_101      -----------G--------GCGG-------------------------- 5
Halorubrum_litoreum                 -----------G--------GCGG-------------------------- 5
Halorubrum_terrestre                -----------G--------GCGG-------------------------- 5
Halorubrum_coriense                 -----------G--------GCGG-------------------------- 5
Halorubrum_aidingense               --------------------GCGG-------------------------- 4
Halococcus_saccharolyticus          GAACCCGACGCGATTCCGACGCGGA------------------------- 27
Haloferax_alexandrinus              --------------------------------------------------
Halorubrum_tebenquichense           --------------------------------------------------
Haloferax_lucentense                --------------------------------------------------
Halorubrum_californiensis           -------------------GACGC-------------------------- 5
Halorubrum_hochstenium              -------------------GGCGG-------------------------- 5
Haloferax_volcanii                  --------------------------------------------------
Natronorubrum_sulfidifaciens        ----CCGCGTCGCTACCCCGACCGTCTCTCGAG--------------TCG 32
Halogeometricum_borinquense         ----CAGAGACTCGTCAGCAG---TTTTTCGGGATA---------CAGTG 41
Halogeometricum_borinquense_DS      ----CAGAGACTCGTCAGCAG---TTTTTCGGGATA---------CAGTG 41
Haloferax_mucosum                   ---------------------------TTC------------------TG 5
Haloferax_volcanii_DS2_DSM_375      ---------------------------TTC-------------------- 3
Haloferax_larsenii                  ---------------------------TTC------------------TG 5
Natronorubrum_tibetense             CGGTCATTCCCTCTCCATCGAGGATTGTACTAAATTGGGCAAGGACATCG 200
Halovivax_asiaticus                 ----GGGCGTCGGACGAAAGGCGGGAAATAG---------------ACTG 31
                                                                                      

Halorubrum_saccharovorum            ---AACC------------------------------------------- 4
Natronobacterium_gregoryi           GAAAACCGCTACC--TACG------------------------------- 35
Haloferax_elongans                  --------------------------------------------------
Halobiforma_nitratireducens         GACAACTACTACC--GACG------------------------------- 40
Halorubrum_kocurii                  -------GCAACC-CA---------------------------------- 16
Halorubrum_lacusprofundi            GACA-CAGCAACCACTACG------------------------------- 35
Haloferax_gibonsii                  GTCCTCGGCTACCGCTTCA------------------------------- 46
Haloferax_prahovense                GTTCTCGGCTACCGCTTCA------------------------------- 46
Haloferax_sulfurifontis             GTCCTCGGTTACCGCTTCA------------------------------- 46
Haloferax_sp_GUBF-1                 GTCCTCGGCTCCCGATTCA------------------------------- 47
Haloferax_sp_GUBF-2                 GTCCTCGGCTCCCGATTCA------------------------------- 47
Haloferax_sp_GUBF-3                 GTCCTCGGCTCCCGATTCA------------------------------- 47
Haloferax_denitrificans             GTCCTCGGCTACCGCTTCA------------------------------- 46
Haloferax_mediterranei              GTCCTCGGCTACCGATTCA------------------------------- 67
Halosimplex_carlsbadense            --------------------------------------------------
Halosarcina_pallida                 GAACTCGACAGATATGAAA------------------------------- 44
Halorubrum_distributum              -----CGACCG--------------------------------------- 11
Halorubrum_distributum_JCM_101      -----CGACCG--------------------------------------- 11
Halorubrum_litoreum                 -----CGACCG--------------------------------------- 11
Halorubrum_terrestre                -----CGACCG--------------------------------------- 11
Halorubrum_coriense                 -----CGACCG--------------------------------------- 11
Halorubrum_aidingense               -----CGGACA--------------------------------------- 10
Halococcus_saccharolyticus          GCCCTCGGCCA--------------------------------------- 38
Haloferax_alexandrinus              --------------------------------------------------
Halorubrum_tebenquichense           ----------G--------------------------------------- 1
Haloferax_lucentense                --------------------------------------------------
Halorubrum_californiensis           --TGACGACCG--------------------------------------- 14
Halorubrum_hochstenium              --CGGCGACCA--------------------------------------- 14
Haloferax_volcanii                  -TTC---------------------------------------------- 3
Natronorubrum_sulfidifaciens        ATTCATCACGG--------------------------------------- 43
Halogeometricum_borinquense         TATCTCCTCAATGGAGG--------------------------------- 58
Halogeometricum_borinquense_DS      TATCTCCTCAATGGAGG--------------------------------- 58
Haloferax_mucosum                   T------------------------------------------------- 6
Haloferax_volcanii_DS2_DSM_375      --------------------------------------------------
Haloferax_larsenii                  C------------------------------------------------- 6
Natronorubrum_tibetense             TCTCCCCTCATAATTGGGCTTAGTTGGTAATATGTAAAACGTTACTTGAT 250
Halovivax_asiaticus                 GTTGCCGGCTGTG------------------------------------- 44
                                                                                      

Halorubrum_saccharovorum            --------------------------------------------------
Natronobacterium_gregoryi           --------------------------------------------------
Haloferax_elongans                  --------------------------------------------------
Halobiforma_nitratireducens         --------------------------------------------------
Halorubrum_kocurii                  --------------------------------------------------
Halorubrum_lacusprofundi            --------------------------------------------------
Haloferax_gibonsii                  ------------------------------------------------GG 48
Haloferax_prahovense                ------------------------------------------------GG 48
Haloferax_sulfurifontis             ------------------------------------------------GG 48
Haloferax_sp_GUBF-1                 ------------------------------------------------GG 49
Haloferax_sp_GUBF-2                 ------------------------------------------------GG 49
Haloferax_sp_GUBF-3                 ------------------------------------------------GG 49
Haloferax_denitrificans             ------------------------------------------------GG 48
Haloferax_mediterranei              ------------------------------------------------GG 69
Halosimplex_carlsbadense            --------------------------------------------------
Halosarcina_pallida                 ------------------------------------------------CG 46
Halorubrum_distributum              ------------------------------------------------CG 13
Halorubrum_distributum_JCM_101      ------------------------------------------------CG 13
Halorubrum_litoreum                 ------------------------------------------------CG 13
Halorubrum_terrestre                ------------------------------------------------CG 13
Halorubrum_coriense                 ------------------------------------------------CG 13
Halorubrum_aidingense               ------------------------------------------------CA 12
Halococcus_saccharolyticus          ------------------------------------------------CA 40
Haloferax_alexandrinus              --------------------------------------------------
Halorubrum_tebenquichense           -------------------------------------------------G 2
Haloferax_lucentense                --------------------------------------------------
Halorubrum_californiensis           -------------------------------------------------A 15
Halorubrum_hochstenium              -------------------------------------------------A 15
Haloferax_volcanii                  --------------------------------------------------
Natronorubrum_sulfidifaciens        --------------------------------------------------
Halogeometricum_borinquense         ---AGAGCGG---------------------------------------- 65
Halogeometricum_borinquense_DS      ---AGAGCGG---------------------------------------- 65
Haloferax_mucosum                   --------------------------------------------------
Haloferax_volcanii_DS2_DSM_375      --------------------------------------------------
Haloferax_larsenii                  --------------------------------------------------
Natronorubrum_tibetense             TTTTGGGCGATAGTAGCCACTGGATATCACTGAACACCCGATCACAGAAC 300
Halovivax_asiaticus                 -------------------------------------------------A 45
                                                                                      

Halorubrum_saccharovorum            --------------------------------------------------
Natronobacterium_gregoryi           -ACA------ACTG-------ACA-CT----------------------- 47
Haloferax_elongans                  ---------------------ACAACG----------------------- 6
Halobiforma_nitratireducens         -CCACTCGTAACCG-------ACAACGT---------------------- 60
Halorubrum_kocurii                  --------------------------------------------------
Halorubrum_lacusprofundi            -AATCGGCGTACTGG---GGTACCGCTTC--------------------- 60
Haloferax_gibonsii                  CCCACCTTTTTGCGGTTCGGGGCCGCTTCGCGACCCGCTCTCCCCAAAAA 98
Haloferax_prahovense                CCCACCTTTTTGCGGTTCGGGGCCGCTTCGCGACCCGCTCACCCCAAAAA 98
Haloferax_sulfurifontis             CCCACCTTTTTCCGGTTCGGGGCCGCGTCGCGACCCGCTCACCCCAAAAA 98
Haloferax_sp_GUBF-1                 CCCACCTTTTTCCGGTTCGGGGCCGCTCCGCGACCCGCTCACCGGAAAAA 99
Haloferax_sp_GUBF-2                 CCCACCTTTTTCCGGTTCGGGGCCGCTCCGCGACCCGCTCACCGGAAAAA 99
Haloferax_sp_GUBF-3                 CCCACCTTTTTCCGGTTCGGGGCCGCTCCGCGACCCGCTCACCGGAAAAA 99
Haloferax_denitrificans             CCCACCTTTTTCCGGTTCGGGGCCGCTTCGCGACCCGCTCACCGCAAAAA 98
Haloferax_mediterranei              CCCACCTTTTTCCGGTTCGGGGCCGCTTCGTGGCCCGCTCACCGGAAAAA 119
Halosimplex_carlsbadense            ----------ACC------------------------------------- 3
Halosarcina_pallida                 CTAAGCCGCCACCGCG----TGAAGC------------GGGGGC------ 74
Halorubrum_distributum              ATAATCC------------------------------------------- 20
Halorubrum_distributum_JCM_101      ATAATCCATGACA------------------------------------- 26
Halorubrum_litoreum                 ATAATCCATGACA------------------------------------- 26
Halorubrum_terrestre                A-AATCCACGACA------------------------------------- 25
Halorubrum_coriense                 G-AACGCA-GACA------------------------------------- 24
Halorubrum_aidingense               CCA----------------------------------------------- 15
Halococcus_saccharolyticus          CCCGCTCCAACCCGGAGAACTAAGGCGACATCGGGTGTGGGTGCCGACAT 90
Haloferax_alexandrinus              ----TCCA------------------------------------------ 4
Halorubrum_tebenquichense           G-GATCCAC-AC-------------------------------------- 12
Haloferax_lucentense                ----TCCA------------------------------------------ 4
Halorubrum_californiensis           GAGATCCACGACA------------------------------------- 28
Halorubrum_hochstenium              CAGATCCACGAC-------------------------------------- 27
Haloferax_volcanii                  --------------------------------------------------
Natronorubrum_sulfidifaciens        ATCGTG--AGACTGT------------CACTCGTGACGAAAAG------- 72
Halogeometricum_borinquense         ACCGTCGCAAAAGGT------------TGCTGGACATGAAA--------- 94
Halogeometricum_borinquense_DS      ACCGTCGCAAAAGGT------------TGCTGGACATGAAA--------- 94
Haloferax_mucosum                   --------------------------------------------------
Haloferax_volcanii_DS2_DSM_375      --------------------------------------------------
Haloferax_larsenii                  --------------------------------------------------
Natronorubrum_tibetense             AGCGTTGCGATCGGTGTGTGAATCGTTTTCTAGAGATGATTGTTCAGTGC 350
Halovivax_asiaticus                 ATAATTGCTAACTGT--------------CGCGTCG-------------- 67
                                                                                      

Halorubrum_saccharovorum            --------------------------------------------------
Natronobacterium_gregoryi           --------------------------------------------------
Haloferax_elongans                  --------------------------------------------------
Halobiforma_nitratireducens         --------------------------------------------------
Halorubrum_kocurii                  --------------------------------------------------
Halorubrum_lacusprofundi            --------------------------------------------------
Haloferax_gibonsii                  TCTGGACCAAAAAGTGCCGCGAGACTCGGCCTCCGGCCTCGCCCGCGGTA 148
Haloferax_prahovense                TCTGGACCAAAAAGTGCCGCGAGACTCGGCCTCCGGCCTCGCCCGCGGTA 148
Haloferax_sulfurifontis             TATGGACCAAAAACTGCCGCGAGACTCGGCCTCCGGCCTCGCTCGCGGTA 148
Haloferax_sp_GUBF-1                 TCTGGACCAAAAAACGCCGCGAGACTCGGCCTCCGGCCTCGCTCGCGGTA 149
Haloferax_sp_GUBF-2                 TCTGGACCAAAAAACGCCGCGAGACTCGGCCTCCGGCCTCGCTCGCGGTA 149
Haloferax_sp_GUBF-3                 TCTGGACCAAAAAACGCCGCGAGACTCGGCCTCCGGCCTCGCTCGCGGTA 149
Haloferax_denitrificans             TCTGGGCCAAAAACTGCCGCGAGACTCGGCCGCCGGCCTCGCTCGCGGTA 148
Haloferax_mediterranei              TCTGGACCAAAAAGTGCCACGAGACTCGGCCTTCGGCCTCGCTCGCGGTA 169
Halosimplex_carlsbadense            --------------------------------------------------
Halosarcina_pallida                 --------------------------------------------------
Halorubrum_distributum              --------------------------------------------------
Halorubrum_distributum_JCM_101      --------------------------------------------------
Halorubrum_litoreum                 --------------------------------------------------
Halorubrum_terrestre                --------------------------------------------------
Halorubrum_coriense                 --------------------------------------------------
Halorubrum_aidingense               --------------------------------------------------
Halococcus_saccharolyticus          GGCA---------------------------------------------- 94
Haloferax_alexandrinus              --------------------------------------------------
Halorubrum_tebenquichense           --------------------------------------------------
Haloferax_lucentense                --------------------------------------------------
Halorubrum_californiensis           --------------------------------------------------
Halorubrum_hochstenium              --------------------------------------------------
Haloferax_volcanii                  --------------------------------------------------
Natronorubrum_sulfidifaciens        -------------------------------CACTAA---------CTAC 82
Halogeometricum_borinquense         -------------------------------CGCTAAG-------CCGTC 106
Halogeometricum_borinquense_DS      -------------------------------CGCTAAG-------CCGTC 106
Haloferax_mucosum                   --------------------------------------------------
Haloferax_volcanii_DS2_DSM_375      --------------------------------------------------
Haloferax_larsenii                  --------------------------------------------------
Natronorubrum_tibetense             GCACGTCGACTGTGCACGTATTCCTCGAGTGCCCCACGGAAAACTCCCTC 400
Halovivax_asiaticus                 --------------------------------GCGAAG--------CGTC 77
                                                                                      

Halorubrum_saccharovorum            --------------------------------------------
Natronobacterium_gregoryi           --------------------------------------------
Haloferax_elongans                  --------------------------------------------
Halobiforma_nitratireducens         --------------------------------------------
Halorubrum_kocurii                  --------------------------------------------
Halorubrum_lacusprofundi            --------------------------------------------
Haloferax_gibonsii                  CCGCATCGGGCACGGAGGTGGCGCA------------------- 173
Haloferax_prahovense                CCGCATCGGGCACGGAGGTGGCGCA------------------- 173
Haloferax_sulfurifontis             CCGCATCGGGCACGGAGGTGGCGCA------------------- 173
Haloferax_sp_GUBF-1                 CTGCATCGGCCACGGAGGTGGCACA------------------- 174
Haloferax_sp_GUBF-2                 CTGCATCGGCCACGGAGGTGGCACA------------------- 174
Haloferax_sp_GUBF-3                 CTGCATCGGCCACGGAGGTGGCACA------------------- 174
Haloferax_denitrificans             CTGCACTGGTCACGGAGGCGGCACA------------------- 173
Haloferax_mediterranei              CTGAATCGGCTGGTGGGGTGACACA------------------- 194
Halosimplex_carlsbadense            --------------------------------------------
Halosarcina_pallida                 --------------------------------------------
Halorubrum_distributum              --------------------------------------------
Halorubrum_distributum_JCM_101      --------------------------------------------
Halorubrum_litoreum                 --------------------------------------------
Halorubrum_terrestre                --------------------------------------------
Halorubrum_coriense                 --------------------------------------------
Halorubrum_aidingense               --------------------------------------------
Halococcus_saccharolyticus          --------------------------------------------
Haloferax_alexandrinus              --------------------------------------------
Halorubrum_tebenquichense           --------------------------------------------
Haloferax_lucentense                --------------------------------------------
Halorubrum_californiensis           --------------------------------------------
Halorubrum_hochstenium              --------------------------------------------
Haloferax_volcanii                  --------------------------------------------
Natronorubrum_sulfidifaciens        ACCTATTGTGAATGAGTGTGT----------------------- 103
Halogeometricum_borinquense         GCC--GTGAGAACCGCTCACT----------------------- 125
Halogeometricum_borinquense_DS      GCC--GTGAGAACCGCTCACT----------------------- 125
Haloferax_mucosum                   --------------------------------------------
Haloferax_volcanii_DS2_DSM_375      --------------------------------------------
Haloferax_larsenii                  --------------------------------------------
Natronorubrum_tibetense             GCG--ACGAAAACCACTAACTACACTCGTTGTGAACGAGTACGT 442
Halovivax_asiaticus                 CGC----------------------------------------- 80

####                                                                                                                            
AllGaps_MinusThailandensis_And_Tibetense_Alignment.txt  CLUSTAL 2.1 multiple sequence alignment


Haloferax_sp_GUBF-1                 --------------------TCCAATGACTGAACAACTCTCTATCGGCGT 30
Haloferax_sp_GUBF-2                 --------------------TCCAATGACTGAACAACTCTCTATCGGCGT 30
Haloferax_sp_GUBF-3                 --------------------TCCAATGACTGAACAACTCTCTATCGGCGT 30
Haloferax_gibonsii                  ---------------------TCCATGTCTGAACCGCTCTCAGTCGGCGT 29
Haloferax_prahovense                ---------------------CTCATGTCTGAACCCCTCAAAATCGGCGT 29
Haloferax_sulfurifontis             ---------------------TTCATGACTGACAAACTTTCCGTCGGCGT 29
Haloferax_denitrificans             ---------------------TCCATGACTGACTCACTCAAAATCGGCGT 29
Haloferax_mediterranei              TTCTCGATGAGTAACACCGATTCTACGACCGAACCCCTCAAAATCGGCGT 50
Halorubrum_distributum              ---------------------------------------------GGCGG 5
Halorubrum_distributum_JCM_101      ---------------------------------------------GGCGG 5
Halorubrum_litoreum                 ---------------------------------------------GGCGG 5
Halorubrum_terrestre                ---------------------------------------------GGCGG 5
Halorubrum_coriense                 ---------------------------------------------GGCGG 5
Halosimplex_carlsbadense            --------------------------------------------------
Halorubrum_saccharovorum            --------------------------------------------------
Natronobacterium_gregoryi           ------------------------------------CG------CGATAG 8
Haloferax_elongans                  --------------------------------------------------
Halobiforma_nitratireducens         ------------------------------------CGACCCCTCGCAAG 14
Halorubrum_lacusprofundi            -------------------------------------G------CGGAGG 7
Halorubrum_aidingense               --------------------------------------------------
Halococcus_saccharolyticus          ------------------------------TCGAACCCGACGCGATTCCG 20
Halorubrum_kocurii                  -------------------------------------------------G 1
Haloferax_alexandrinus              --------------------------------------------------
Halorubrum_tebenquichense           ------------------------------------------------G- 1
Haloferax_lucentense                --------------------------------------------------
Halorubrum_californiensis           ---------------------------------------------GACGC 5
Halorubrum_hochstenium              ---------------------------------------------GGCGG 5
Haloferax_volcanii                  --------------------------------------------------
Natronorubrum_sulfidifaciens        -----------------------------------------CCGCGTCGC 9
Halosarcina_pallida                 -------------------------------------------G-GTT-- 4
Halogeometricum_borinquense         ----------------------------------------TCTGTCTCAG 10
Halogeometricum_borinquense_DS      ----------------------------------------TCTGTCTCAG 10
Haloferax_mucosum                   --------------------------------------------------
Haloferax_volcanii_DS2_DSM_375      --------------------------------------------------
Haloferax_larsenii                  --------------------------------------------------
Halovivax_asiaticus                 -----------------------------------------GGGCGTCGG 9
                                                                                      

Haloferax_sp_GUBF-1                 CCTCGGCTCCCGATTCAGGCCCACCTTTTTCCGGTTCGGGGCCGCTCCGC 80
Haloferax_sp_GUBF-2                 CCTCGGCTCCCGATTCAGGCCCACCTTTTTCCGGTTCGGGGCCGCTCCGC 80
Haloferax_sp_GUBF-3                 CCTCGGCTCCCGATTCAGGCCCACCTTTTTCCGGTTCGGGGCCGCTCCGC 80
Haloferax_gibonsii                  CCTCGGCTACCGCTTCAGGCCCACCTTTTTGCGGTTCGGGGCCGCTTCGC 79
Haloferax_prahovense                TCTCGGCTACCGCTTCAGGCCCACCTTTTTGCGGTTCGGGGCCGCTTCGC 79
Haloferax_sulfurifontis             CCTCGGTTACCGCTTCAGGCCCACCTTTTTCCGGTTCGGGGCCGCGTCGC 79
Haloferax_denitrificans             CCTCGGCTACCGCTTCAGGCCCACCTTTTTCCGGTTCGGGGCCGCTTCGC 79
Haloferax_mediterranei              CCTCGGCTACCGATTCAGGCCCACCTTTTTCCGGTTCGGGGCCGCTTCGT 100
Halorubrum_distributum              CGACCGCGAT-------AATCC---------------------------- 20
Halorubrum_distributum_JCM_101      CGACCGCGAT-------AATCCATG------------------------- 23
Halorubrum_litoreum                 CGACCGCGAT-------AATCCATG------------------------- 23
Halorubrum_terrestre                CGACCGCGA--------AATCCACG------------------------- 22
Halorubrum_coriense                 CGACCGCGG--------AACGCA-G------------------------- 21
Halosimplex_carlsbadense            --ACC--------------------------------------------- 3
Halorubrum_saccharovorum            ------------------AACC---------------------------- 4
Natronobacterium_gregoryi           ACACGACGAAG-----AAAACCGCT------------------------- 28
Haloferax_elongans                  --------------------------------------------------
Halobiforma_nitratireducens         -CACAGCGAAG-----ACAACTACT------------------------- 33
Halorubrum_lacusprofundi            ATAAACCAATG-----ACA-CAGCA------------------------- 26
Halorubrum_aidingense               --GCGG-----------CGGACACA------------------------- 12
Halococcus_saccharolyticus          ACGCGGAGCCC-----TCGGCCACA------------------------- 40
Halorubrum_kocurii                  --ACGG-----------AGGGCAAC------------------------- 13
Haloferax_alexandrinus              -------------------TCCA--------------------------- 4
Halorubrum_tebenquichense           -G--G------------GATCCAC-------------------------- 10
Haloferax_lucentense                -------------------TCCA--------------------------- 4
Halorubrum_californiensis           TGACGACCGAG-----AGATCCACG------------------------- 25
Halorubrum_hochstenium              CGGCGACCAAC-----AGATCCACG------------------------- 25
Haloferax_volcanii                  ------------------------TTC----------------------- 3
Natronorubrum_sulfidifaciens        TACCCCGACCGTCTCTCGAGTCGATTCA------------------TCAC 41
Halosarcina_pallida                 ---CCCG--CG-----GGAGACGCTCC--------------------CGG 24
Halogeometricum_borinquense         AGACTCGTCAG--CAGTTTTTCGGGATA------------------CAGT 40
Halogeometricum_borinquense_DS      AGACTCGTCAG--CAGTTTTTCGGGATA------------------CAGT 40
Haloferax_mucosum                   -------------------TTC---------------------------T 4
Haloferax_volcanii_DS2_DSM_375      -------------------TTC---------------------------- 3
Haloferax_larsenii                  -------------------TTC---------------------------T 4
Halovivax_asiaticus                 ACGAAAGGCGG--GAAATAGAC---------------------------T 30
                                                                                      

Haloferax_sp_GUBF-1                 GACCCGCTCACCGGAAAAATCTGGACCAAAAAACGCCGCGAGACTCGGCC 130
Haloferax_sp_GUBF-2                 GACCCGCTCACCGGAAAAATCTGGACCAAAAAACGCCGCGAGACTCGGCC 130
Haloferax_sp_GUBF-3                 GACCCGCTCACCGGAAAAATCTGGACCAAAAAACGCCGCGAGACTCGGCC 130
Haloferax_gibonsii                  GACCCGCTCTCCCCAAAAATCTGGACCAAAAAGTGCCGCGAGACTCGGCC 129
Haloferax_prahovense                GACCCGCTCACCCCAAAAATCTGGACCAAAAAGTGCCGCGAGACTCGGCC 129
Haloferax_sulfurifontis             GACCCGCTCACCCCAAAAATATGGACCAAAAACTGCCGCGAGACTCGGCC 129
Haloferax_denitrificans             GACCCGCTCACCGCAAAAATCTGGGCCAAAAACTGCCGCGAGACTCGGCC 129
Haloferax_mediterranei              GGCCCGCTCACCGGAAAAATCTGGACCAAAAAGTGCCACGAGACTCGGCC 150
Halorubrum_distributum              --------------------------------------------------
Halorubrum_distributum_JCM_101      -ACA---------------------------------------------- 26
Halorubrum_litoreum                 -ACA---------------------------------------------- 26
Halorubrum_terrestre                -ACA---------------------------------------------- 25
Halorubrum_coriense                 -ACA---------------------------------------------- 24
Halosimplex_carlsbadense            --------------------------------------------------
Halorubrum_saccharovorum            --------------------------------------------------
Natronobacterium_gregoryi           -ACC--TACGACA------ACTG-----ACA-CT---------------- 47
Haloferax_elongans                  ----------------------------ACAACG---------------- 6
Halobiforma_nitratireducens         -ACC--GACGCCACTCGTAACCG-----ACAACGT--------------- 60
Halorubrum_lacusprofundi            -ACCACTACGAATCGGCGTACTGGGGT-ACCGCTTC-------------- 60
Halorubrum_aidingense               -CCA---------------------------------------------- 15
Halococcus_saccharolyticus          -CCCGCTCCAACCCGGAGAACTAAGGCGACATCGGGTGTGGGTGCCGACA 89
Halorubrum_kocurii                  -CCA---------------------------------------------- 16
Haloferax_alexandrinus              --------------------------------------------------
Halorubrum_tebenquichense           -AC----------------------------------------------- 12
Haloferax_lucentense                --------------------------------------------------
Halorubrum_californiensis           -ACA---------------------------------------------- 28
Halorubrum_hochstenium              -AC----------------------------------------------- 27
Haloferax_volcanii                  --------------------------------------------------
Natronorubrum_sulfidifaciens        GGATCGTGAGACTGTCACTCGTGACGAAAAGCACTAA------------- 78
Halosarcina_pallida                 GGAAC-T-CGACAG--ATATGAAACGCTAAGC------------------ 52
Halogeometricum_borinquense         GTATC--TCCTCAATGGAGGAGAGCGGACCGTCGCAAAAGGTTGCTGGAC 88
Halogeometricum_borinquense_DS      GTATC--TCCTCAATGGAGGAGAGCGGACCGTCGCAAAAGGTTGCTGGAC 88
Haloferax_mucosum                   GT------------------------------------------------ 6
Haloferax_volcanii_DS2_DSM_375      --------------------------------------------------
Haloferax_larsenii                  GC------------------------------------------------ 6
Halovivax_asiaticus                 GGTTG--CCGGCTGTGAATAATTGCTAACTGTCG---------------- 62
                                                                                      

Haloferax_sp_GUBF-1                 TCCGGCCTCGCTCGCGGTACTGCATCGGCCACGGAGGTGGCACA 174
Haloferax_sp_GUBF-2                 TCCGGCCTCGCTCGCGGTACTGCATCGGCCACGGAGGTGGCACA 174
Haloferax_sp_GUBF-3                 TCCGGCCTCGCTCGCGGTACTGCATCGGCCACGGAGGTGGCACA 174
Haloferax_gibonsii                  TCCGGCCTCGCCCGCGGTACCGCATCGGGCACGGAGGTGGCGCA 173
Haloferax_prahovense                TCCGGCCTCGCCCGCGGTACCGCATCGGGCACGGAGGTGGCGCA 173
Haloferax_sulfurifontis             TCCGGCCTCGCTCGCGGTACCGCATCGGGCACGGAGGTGGCGCA 173
Haloferax_denitrificans             GCCGGCCTCGCTCGCGGTACTGCACTGGTCACGGAGGCGGCACA 173
Haloferax_mediterranei              TTCGGCCTCGCTCGCGGTACTGAATCGGCTGGTGGGGTGACACA 194
Halorubrum_distributum              --------------------------------------------
Halorubrum_distributum_JCM_101      --------------------------------------------
Halorubrum_litoreum                 --------------------------------------------
Halorubrum_terrestre                --------------------------------------------
Halorubrum_coriense                 --------------------------------------------
Halosimplex_carlsbadense            --------------------------------------------
Halorubrum_saccharovorum            --------------------------------------------
Natronobacterium_gregoryi           --------------------------------------------
Haloferax_elongans                  --------------------------------------------
Halobiforma_nitratireducens         --------------------------------------------
Halorubrum_lacusprofundi            --------------------------------------------
Halorubrum_aidingense               --------------------------------------------
Halococcus_saccharolyticus          TGGCA--------------------------------------- 94
Halorubrum_kocurii                  --------------------------------------------
Haloferax_alexandrinus              --------------------------------------------
Halorubrum_tebenquichense           --------------------------------------------
Haloferax_lucentense                --------------------------------------------
Halorubrum_californiensis           --------------------------------------------
Halorubrum_hochstenium              --------------------------------------------
Haloferax_volcanii                  --------------------------------------------
Natronorubrum_sulfidifaciens        --------------CTACACCTATTGTGAATGAGTGTGT----- 103
Halosarcina_pallida                 --------------CGCCACCG--CGTGAA-GCGGGGGC----- 74
Halogeometricum_borinquense         ATGAAACGCTAAGCCGTCGCCG-TGAGAACCGCTCACT------ 125
Halogeometricum_borinquense_DS      ATGAAACGCTAAGCCGTCGCCG-TGAGAACCGCTCACT------ 125
Haloferax_mucosum                   --------------------------------------------
Haloferax_volcanii_DS2_DSM_375      --------------------------------------------
Haloferax_larsenii                  --------------------------------------------
Halovivax_asiaticus                 --------------CGTCGGCG-AAGCGTCCGC----------- 80


####
AllGaps_MinusThailandensis_And_Tibetense.fasta

>Haloferax_volcanii
TTC

>Haloferax_volcanii_DS2_DSM_3757
TTC

>Halosimplex_carlsbadense
ACC

>Haloferax_alexandrinus
TCCA

>Haloferax_lucentense
TCCA

>Halorubrum_saccharovorum
AACC

>Haloferax_elongans
ACAACG

>Haloferax_larsenii
TTCTGC

>Haloferax_mucosum
TTCTGT

>Halorubrum_tebenquichense
GGGGATCCACAC

>Halorubrum_aidingense
GCGGCGGACACACCA

>Halorubrum_kocurii
GACGGAGGGCAACCCA

>Halorubrum_distributum
GGCGGCGACCGCGATAATCC

>Halorubrum_coriense
GGCGGCGACCGCGGAACGCAGACA

>Halorubrum_terrestre
GGCGGCGACCGCGAAATCCACGACA

>Halorubrum_distributum_JCM_10118
GGCGGCGACCGCGATAATCCATGACA

>Halorubrum_litoreum
GGCGGCGACCGCGATAATCCATGACA

>Halorubrum_hochstenium
GGCGGCGGCGACCAACAGATCCACGAC

>Halorubrum_californiensis
GACGCTGACGACCGAGAGATCCACGACA

>Natronobacterium_gregoryi
CGCGATAGACACGACGAAGAAAACCGCTACCTACGACAACTGACACT

>Halobiforma_nitratireducens
CGACCCCTCGCAAGCACAGCGAAGACAACTACTACCGACGCCACTCGTAACCGACAACGT

>Halorubrum_lacusprofundi
GCGGAGGATAAACCAATGACACAGCAACCACTACGAATCGGCGTACTGGGGTACCGCTTC

>Halosarcina_pallida
GGTTCCCGCGGGAGACGCTCCCGGGGAACTCGACAGATATGAAACGCTAAGCCGCCACCGCGTGAAGCGGGGGC

>Halovivax_asiaticus
GGGCGTCGGACGAAAGGCGGGAAATAGACTGGTTGCCGGCTGTGAATAATTGCTAACTGTCGCGTCGGCGAAGCGTCCGC

>Halococcus_saccharolyticus
TCGAACCCGACGCGATTCCGACGCGGAGCCCTCGGCCACACCCGCTCCAACCCGGAGAACTAAGGCGACATCGGGTGTGGGTGCCGACATGGCA

>Natronorubrum_sulfidifaciens
CCGCGTCGCTACCCCGACCGTCTCTCGAGTCGATTCATCACGGATCGTGAGACTGTCACTCGTGACGAAAAGCACTAACTACACCTATTGTGAATGAGTGTGT

>Halogeometricum_borinquense
TCTGTCTCAGAGACTCGTCAGCAGTTTTTCGGGATACAGTGTATCTCCTCAATGGAGGAGAGCGGACCGTCGCAAAAGGTTGCTGGACATGAAACGCTAAGCCGTCGCCGTGAGAACCGCTCACT

>Halogeometricum_borinquense_DSM_11551
TCTGTCTCAGAGACTCGTCAGCAGTTTTTCGGGATACAGTGTATCTCCTCAATGGAGGAGAGCGGACCGTCGCAAAAGGTTGCTGGACATGAAACGCTAAGCCGTCGCCGTGAGAACCGCTCACT

>Haloferax_denitrificans
TCCATGACTGACTCACTCAAAATCGGCGTCCTCGGCTACCGCTTCAGGCCCACCTTTTTCCGGTTCGGGGCCGCTTCGCGACCCGCTCACCGCAAAAATCTGGGCCAAAAACTGCCGCGAGACTCGGCCGCCGGCCTCGCTCGCGGTACTGCACTGGTCACGGAGGCGGCACA

>Haloferax_gibonsii
TCCATGTCTGAACCGCTCTCAGTCGGCGTCCTCGGCTACCGCTTCAGGCCCACCTTTTTGCGGTTCGGGGCCGCTTCGCGACCCGCTCTCCCCAAAAATCTGGACCAAAAAGTGCCGCGAGACTCGGCCTCCGGCCTCGCCCGCGGTACCGCATCGGGCACGGAGGTGGCGCA

>Haloferax_prahovense
CTCATGTCTGAACCCCTCAAAATCGGCGTTCTCGGCTACCGCTTCAGGCCCACCTTTTTGCGGTTCGGGGCCGCTTCGCGACCCGCTCACCCCAAAAATCTGGACCAAAAAGTGCCGCGAGACTCGGCCTCCGGCCTCGCCCGCGGTACCGCATCGGGCACGGAGGTGGCGCA

>Haloferax_sulfurifontis
TTCATGACTGACAAACTTTCCGTCGGCGTCCTCGGTTACCGCTTCAGGCCCACCTTTTTCCGGTTCGGGGCCGCGTCGCGACCCGCTCACCCCAAAAATATGGACCAAAAACTGCCGCGAGACTCGGCCTCCGGCCTCGCTCGCGGTACCGCATCGGGCACGGAGGTGGCGCA

>Haloferax_sp_GUBF-1
TCCAATGACTGAACAACTCTCTATCGGCGTCCTCGGCTCCCGATTCAGGCCCACCTTTTTCCGGTTCGGGGCCGCTCCGCGACCCGCTCACCGGAAAAATCTGGACCAAAAAACGCCGCGAGACTCGGCCTCCGGCCTCGCTCGCGGTACTGCATCGGCCACGGAGGTGGCACA

>Haloferax_sp_GUBF-2
TCCAATGACTGAACAACTCTCTATCGGCGTCCTCGGCTCCCGATTCAGGCCCACCTTTTTCCGGTTCGGGGCCGCTCCGCGACCCGCTCACCGGAAAAATCTGGACCAAAAAACGCCGCGAGACTCGGCCTCCGGCCTCGCTCGCGGTACTGCATCGGCCACGGAGGTGGCACA

>Haloferax_sp_GUBF-3
TCCAATGACTGAACAACTCTCTATCGGCGTCCTCGGCTCCCGATTCAGGCCCACCTTTTTCCGGTTCGGGGCCGCTCCGCGACCCGCTCACCGGAAAAATCTGGACCAAAAAACGCCGCGAGACTCGGCCTCCGGCCTCGCTCGCGGTACTGCATCGGCCACGGAGGTGGCACA

>Haloferax_mediterranei
TTCTCGATGAGTAACACCGATTCTACGACCGAACCCCTCAAAATCGGCGTCCTCGGCTACCGATTCAGGCCCACCTTTTTCCGGTTCGGGGCCGCTTCGTGGCCCGCTCACCGGAAAAATCTGGACCAAAAAGTGCCACGAGACTCGGCCTTCGGCCTCGCTCGCGGTACTGAATCGGCTGGTGGGGTGACACA
                                                               
 ####
 AllGaps_MinusThailandensis.fasta
 
>Haloferax_volcanii
TTC

>Haloferax_volcanii_DS2_DSM_3757
TTC

>Halosimplex_carlsbadense
ACC

>Haloferax_alexandrinus
TCCA

>Haloferax_lucentense
TCCA

>Halorubrum_saccharovorum
AACC

>Haloferax_elongans
ACAACG

>Haloferax_larsenii
TTCTGC

>Haloferax_mucosum
TTCTGT

>Halorubrum_tebenquichense
GGGGATCCACAC

>Halorubrum_aidingense
GCGGCGGACACACCA

>Halorubrum_kocurii
GACGGAGGGCAACCCA

>Halorubrum_distributum
GGCGGCGACCGCGATAATCC

>Halorubrum_coriense
GGCGGCGACCGCGGAACGCAGACA

>Halorubrum_terrestre
GGCGGCGACCGCGAAATCCACGACA

>Halorubrum_distributum_JCM_10118
GGCGGCGACCGCGATAATCCATGACA

>Halorubrum_litoreum
GGCGGCGACCGCGATAATCCATGACA

>Halorubrum_hochstenium
GGCGGCGGCGACCAACAGATCCACGAC

>Halorubrum_californiensis
GACGCTGACGACCGAGAGATCCACGACA

>Natronobacterium_gregoryi
CGCGATAGACACGACGAAGAAAACCGCTACCTACGACAACTGACACT

>Halobiforma_nitratireducens
CGACCCCTCGCAAGCACAGCGAAGACAACTACTACCGACGCCACTCGTAACCGACAACGT

>Halorubrum_lacusprofundi
GCGGAGGATAAACCAATGACACAGCAACCACTACGAATCGGCGTACTGGGGTACCGCTTC

>Halosarcina_pallida
GGTTCCCGCGGGAGACGCTCCCGGGGAACTCGACAGATATGAAACGCTAAGCCGCCACCGCGTGAAGCGGGGGC

>Halovivax_asiaticus
GGGCGTCGGACGAAAGGCGGGAAATAGACTGGTTGCCGGCTGTGAATAATTGCTAACTGTCGCGTCGGCGAAGCGTCCGC

>Halococcus_saccharolyticus
TCGAACCCGACGCGATTCCGACGCGGAGCCCTCGGCCACACCCGCTCCAACCCGGAGAACTAAGGCGACATCGGGTGTGGGTGCCGACATGGCA

>Natronorubrum_sulfidifaciens
CCGCGTCGCTACCCCGACCGTCTCTCGAGTCGATTCATCACGGATCGTGAGACTGTCACTCGTGACGAAAAGCACTAACTACACCTATTGTGAATGAGTGTGT

>Halogeometricum_borinquense
TCTGTCTCAGAGACTCGTCAGCAGTTTTTCGGGATACAGTGTATCTCCTCAATGGAGGAGAGCGGACCGTCGCAAAAGGTTGCTGGACATGAAACGCTAAGCCGTCGCCGTGAGAACCGCTCACT

>Halogeometricum_borinquense_DSM_11551
TCTGTCTCAGAGACTCGTCAGCAGTTTTTCGGGATACAGTGTATCTCCTCAATGGAGGAGAGCGGACCGTCGCAAAAGGTTGCTGGACATGAAACGCTAAGCCGTCGCCGTGAGAACCGCTCACT

>Haloferax_denitrificans
TCCATGACTGACTCACTCAAAATCGGCGTCCTCGGCTACCGCTTCAGGCCCACCTTTTTCCGGTTCGGGGCCGCTTCGCGACCCGCTCACCGCAAAAATCTGGGCCAAAAACTGCCGCGAGACTCGGCCGCCGGCCTCGCTCGCGGTACTGCACTGGTCACGGAGGCGGCACA

>Haloferax_gibonsii
TCCATGTCTGAACCGCTCTCAGTCGGCGTCCTCGGCTACCGCTTCAGGCCCACCTTTTTGCGGTTCGGGGCCGCTTCGCGACCCGCTCTCCCCAAAAATCTGGACCAAAAAGTGCCGCGAGACTCGGCCTCCGGCCTCGCCCGCGGTACCGCATCGGGCACGGAGGTGGCGCA

>Haloferax_prahovense
CTCATGTCTGAACCCCTCAAAATCGGCGTTCTCGGCTACCGCTTCAGGCCCACCTTTTTGCGGTTCGGGGCCGCTTCGCGACCCGCTCACCCCAAAAATCTGGACCAAAAAGTGCCGCGAGACTCGGCCTCCGGCCTCGCCCGCGGTACCGCATCGGGCACGGAGGTGGCGCA

>Haloferax_sulfurifontis
TTCATGACTGACAAACTTTCCGTCGGCGTCCTCGGTTACCGCTTCAGGCCCACCTTTTTCCGGTTCGGGGCCGCGTCGCGACCCGCTCACCCCAAAAATATGGACCAAAAACTGCCGCGAGACTCGGCCTCCGGCCTCGCTCGCGGTACCGCATCGGGCACGGAGGTGGCGCA

>Haloferax_sp_GUBF-1
TCCAATGACTGAACAACTCTCTATCGGCGTCCTCGGCTCCCGATTCAGGCCCACCTTTTTCCGGTTCGGGGCCGCTCCGCGACCCGCTCACCGGAAAAATCTGGACCAAAAAACGCCGCGAGACTCGGCCTCCGGCCTCGCTCGCGGTACTGCATCGGCCACGGAGGTGGCACA

>Haloferax_sp_GUBF-2
TCCAATGACTGAACAACTCTCTATCGGCGTCCTCGGCTCCCGATTCAGGCCCACCTTTTTCCGGTTCGGGGCCGCTCCGCGACCCGCTCACCGGAAAAATCTGGACCAAAAAACGCCGCGAGACTCGGCCTCCGGCCTCGCTCGCGGTACTGCATCGGCCACGGAGGTGGCACA

>Haloferax_sp_GUBF-3
TCCAATGACTGAACAACTCTCTATCGGCGTCCTCGGCTCCCGATTCAGGCCCACCTTTTTCCGGTTCGGGGCCGCTCCGCGACCCGCTCACCGGAAAAATCTGGACCAAAAAACGCCGCGAGACTCGGCCTCCGGCCTCGCTCGCGGTACTGCATCGGCCACGGAGGTGGCACA

>Haloferax_mediterranei
TTCTCGATGAGTAACACCGATTCTACGACCGAACCCCTCAAAATCGGCGTCCTCGGCTACCGATTCAGGCCCACCTTTTTCCGGTTCGGGGCCGCTTCGTGGCCCGCTCACCGGAAAAATCTGGACCAAAAAGTGCCACGAGACTCGGCCTTCGGCCTCGCTCGCGGTACTGAATCGGCTGGTGGGGTGACACA

>Natronorubrum_tibetense
GGGCAGGTGACGCAGCTCCTGCTCAGACGGATGATCGATATGCCAGAACTGGTCAGTATCCCATCATGACGAACACGATAATATAGGAGATCAATCCAAAGATGGCGGTGACCCCCAGCCAGACGAAGACTATGAGAACTGCCTGTCTGCCGGTCATTCCCTCTCCATCGAGGATTGTACTAAATTGGGCAAGGACATCGTCTCCCCTCATAATTGGGCTTAGTTGGTAATATGTAAAACGTTACTTGATTTTTGGGCGATAGTAGCCACTGGATATCACTGAACACCCGATCACAGAACAGCGTTGCGATCGGTGTGTGAATCGTTTTCTAGAGATGATTGTTCAGTGCGCACGTCGACTGTGCACGTATTCCTCGAGTGCCCCACGGAAAACTCCCTCGCGACGAAAACCACTAACTACACTCGTTGTGAACGAGTACGT

####  
AllGaps.fasta

>Halorubrum_arcis


>Haloferax_volcanii
TTC

>Haloferax_volcanii_DS2_DSM_3757
TTC

>Halosimplex_carlsbadense
ACC

>Haloferax_alexandrinus
TCCA

>Haloferax_lucentense
TCCA

>Halorubrum_saccharovorum
AACC

>Haloferax_elongans
ACAACG

>Haloferax_larsenii
TTCTGC

>Haloferax_mucosum
TTCTGT

>Halorubrum_tebenquichense
GGGGATCCACAC

>Halorubrum_aidingense
GCGGCGGACACACCA

>Halorubrum_kocurii
GACGGAGGGCAACCCA

>Halorubrum_distributum
GGCGGCGACCGCGATAATCC

>Halorubrum_coriense
GGCGGCGACCGCGGAACGCAGACA

>Halorubrum_terrestre
GGCGGCGACCGCGAAATCCACGACA

>Halorubrum_distributum_JCM_10118
GGCGGCGACCGCGATAATCCATGACA

>Halorubrum_litoreum
GGCGGCGACCGCGATAATCCATGACA

>Halorubrum_hochstenium
GGCGGCGGCGACCAACAGATCCACGAC

>Halorubrum_californiensis
GACGCTGACGACCGAGAGATCCACGACA

>Natronobacterium_gregoryi
CGCGATAGACACGACGAAGAAAACCGCTACCTACGACAACTGACACT

>Halobiforma_nitratireducens
CGACCCCTCGCAAGCACAGCGAAGACAACTACTACCGACGCCACTCGTAACCGACAACGT

>Halorubrum_lacusprofundi
GCGGAGGATAAACCAATGACACAGCAACCACTACGAATCGGCGTACTGGGGTACCGCTTC

>Halosarcina_pallida
GGTTCCCGCGGGAGACGCTCCCGGGGAACTCGACAGATATGAAACGCTAAGCCGCCACCGCGTGAAGCGGGGGC

>Halovivax_asiaticus
GGGCGTCGGACGAAAGGCGGGAAATAGACTGGTTGCCGGCTGTGAATAATTGCTAACTGTCGCGTCGGCGAAGCGTCCGC

>Halococcus_saccharolyticus
TCGAACCCGACGCGATTCCGACGCGGAGCCCTCGGCCACACCCGCTCCAACCCGGAGAACTAAGGCGACATCGGGTGTGGGTGCCGACATGGCA

>Natronorubrum_sulfidifaciens
CCGCGTCGCTACCCCGACCGTCTCTCGAGTCGATTCATCACGGATCGTGAGACTGTCACTCGTGACGAAAAGCACTAACTACACCTATTGTGAATGAGTGTGT

>Halogeometricum_borinquense
TCTGTCTCAGAGACTCGTCAGCAGTTTTTCGGGATACAGTGTATCTCCTCAATGGAGGAGAGCGGACCGTCGCAAAAGGTTGCTGGACATGAAACGCTAAGCCGTCGCCGTGAGAACCGCTCACT

>Halogeometricum_borinquense_DSM_11551
TCTGTCTCAGAGACTCGTCAGCAGTTTTTCGGGATACAGTGTATCTCCTCAATGGAGGAGAGCGGACCGTCGCAAAAGGTTGCTGGACATGAAACGCTAAGCCGTCGCCGTGAGAACCGCTCACT

>Haloferax_denitrificans
TCCATGACTGACTCACTCAAAATCGGCGTCCTCGGCTACCGCTTCAGGCCCACCTTTTTCCGGTTCGGGGCCGCTTCGCGACCCGCTCACCGCAAAAATCTGGGCCAAAAACTGCCGCGAGACTCGGCCGCCGGCCTCGCTCGCGGTACTGCACTGGTCACGGAGGCGGCACA

>Haloferax_gibonsii
TCCATGTCTGAACCGCTCTCAGTCGGCGTCCTCGGCTACCGCTTCAGGCCCACCTTTTTGCGGTTCGGGGCCGCTTCGCGACCCGCTCTCCCCAAAAATCTGGACCAAAAAGTGCCGCGAGACTCGGCCTCCGGCCTCGCCCGCGGTACCGCATCGGGCACGGAGGTGGCGCA

>Haloferax_prahovense
CTCATGTCTGAACCCCTCAAAATCGGCGTTCTCGGCTACCGCTTCAGGCCCACCTTTTTGCGGTTCGGGGCCGCTTCGCGACCCGCTCACCCCAAAAATCTGGACCAAAAAGTGCCGCGAGACTCGGCCTCCGGCCTCGCCCGCGGTACCGCATCGGGCACGGAGGTGGCGCA

>Haloferax_sulfurifontis
TTCATGACTGACAAACTTTCCGTCGGCGTCCTCGGTTACCGCTTCAGGCCCACCTTTTTCCGGTTCGGGGCCGCGTCGCGACCCGCTCACCCCAAAAATATGGACCAAAAACTGCCGCGAGACTCGGCCTCCGGCCTCGCTCGCGGTACCGCATCGGGCACGGAGGTGGCGCA

>Haloferax_sp_GUBF-1
TCCAATGACTGAACAACTCTCTATCGGCGTCCTCGGCTCCCGATTCAGGCCCACCTTTTTCCGGTTCGGGGCCGCTCCGCGACCCGCTCACCGGAAAAATCTGGACCAAAAAACGCCGCGAGACTCGGCCTCCGGCCTCGCTCGCGGTACTGCATCGGCCACGGAGGTGGCACA

>Haloferax_sp_GUBF-2
TCCAATGACTGAACAACTCTCTATCGGCGTCCTCGGCTCCCGATTCAGGCCCACCTTTTTCCGGTTCGGGGCCGCTCCGCGACCCGCTCACCGGAAAAATCTGGACCAAAAAACGCCGCGAGACTCGGCCTCCGGCCTCGCTCGCGGTACTGCATCGGCCACGGAGGTGGCACA

>Haloferax_sp_GUBF-3
TCCAATGACTGAACAACTCTCTATCGGCGTCCTCGGCTCCCGATTCAGGCCCACCTTTTTCCGGTTCGGGGCCGCTCCGCGACCCGCTCACCGGAAAAATCTGGACCAAAAAACGCCGCGAGACTCGGCCTCCGGCCTCGCTCGCGGTACTGCATCGGCCACGGAGGTGGCACA

>Haloferax_mediterranei
TTCTCGATGAGTAACACCGATTCTACGACCGAACCCCTCAAAATCGGCGTCCTCGGCTACCGATTCAGGCCCACCTTTTTCCGGTTCGGGGCCGCTTCGTGGCCCGCTCACCGGAAAAATCTGGACCAAAAAGTGCCACGAGACTCGGCCTTCGGCCTCGCTCGCGGTACTGAATCGGCTGGTGGGGTGACACA

>Natronorubrum_tibetense
GGGCAGGTGACGCAGCTCCTGCTCAGACGGATGATCGATATGCCAGAACTGGTCAGTATCCCATCATGACGAACACGATAATATAGGAGATCAATCCAAAGATGGCGGTGACCCCCAGCCAGACGAAGACTATGAGAACTGCCTGTCTGCCGGTCATTCCCTCTCCATCGAGGATTGTACTAAATTGGGCAAGGACATCGTCTCCCCTCATAATTGGGCTTAGTTGGTAATATGTAAAACGTTACTTGATTTTTGGGCGATAGTAGCCACTGGATATCACTGAACACCCGATCACAGAACAGCGTTGCGATCGGTGTGTGAATCGTTTTCTAGAGATGATTGTTCAGTGCGCACGTCGACTGTGCACGTATTCCTCGAGTGCCCCACGGAAAACTCCCTCGCGACGAAAACCACTAACTACACTCGTTGTGAACGAGTACGT

>Halococcus_thailandensis
TCCATAGTTGATGATGCTTTAGACACGCCACAGCCGTGATGGTTCTGTGGTCGTCGTTTCACGACTAGGGCCAACCTATCCTGCCAGTGTCGCGTGCTCCTCATGAGGGCAAGCGGTTGCCTTTGGTCCCGACAGGGACCGTGAGGTACCGTGATATGGATGCGAACACTAGAACTGCTGGAAGATGAGGTTGCGCTAATTTTGCATCCTTTAGATGTGGTCATGACTCTGCTTGCGCTCGAACTCGTGTACGGCGTATAATTAGGGGCGTATCCTATTAGTGAGAATTCATCCGATGTACTGGGTTAGCATCCGTGAATTCGATCGTATCCGGAGAGGGGGACGGTTCTAACACTATTTCACTTCGTCTCTAGCCTAGAGGTTTATATCTCTGGAAGTATTTGGCTACTCTAGAGTTATGAGAAAAACTCTAGAAATCTCAGATGAGACCTTCGACACACTCAATGAACTTGGAGGTACATTCGATACCCTTGATGAAGTACTTCAAAAACTAATTCGCGATGCAGGGCACGAAGAATTACTCGACAAAGACAATGACGAAGAAGGAGATAACGGAAACTCCAACACCATGAGTGCACATGATCGCAAGGAGAGGTTCATCAAATCTCTCAAAGAAGACGAGCAAGTACTAAACGTAGAGAAAATCAAGCGCAGCGCCTGGAAAGTCAAAACTCGCAAGGGGAAAAAGATAGTTTGGATCCACTATCATTGTGATTTTGAATTCTTCGGAGGTTCCTGGGAAGTCAATCATAATCTTGAGGATCGGGGTGATCTGATTCATCTTTTCCTTGGACCTCAATCAGAAGACTACTATGTAGTCCCAGACAGCGATCTCCACTCGGGGAAATTTGTGGTATATGATACAAAGGATGGGGGTAACTGGAAATTCAGCACCAAACGTGGTGAGCCGAAAAATTTGGAAGCGCTAGAATCTGAATATTCTAGTCTGGGTCTGATTACCAACTAATATTATGATCCTTGTGGCGATCGGAGGGTGCGGTTACGCATGAAGCCGCTGGGAGACGATATTGTGACTACGATTCGCTCCAAGTATAGACTGTGACGTTCATCCGATGAGGACACTGAGCGCACGATGGTGCGACTTTTGGACCTCATACACGGTGCCACTCATCAACATACAAATTTATAGAACAATAATCAACCTAAATATACTTTATTATAAATAATATATAAAATAAAATTATTTTTATAGTTTGTCGAGATGAGGGATGGAGACGCATATGAAAGCATCATAGTTGTTGTCCGTCACTCGCTGACTGGCGCTGAACACTTACCCCGAAACCTAAGACGCCCTCGACTGTACGCCCAAT

####
GenesOnlySeqs.fasta

>Halococcus_thailandensis-03289
ATGGACGTTGGCGTGCTCACCGTACCCCTCGGCGACCAGCCGCTCGACGAAACGCTCGCCTATCTCGGCG
ATCTCGACGTCGACACCGTCGAACTGGGCTGTGGCGGCAACCCCGGCGACGACCATCTCGTGCGCGAGGA
GTATCTCGACGACGAGGCGGCCCAGGACGAGTTGCAGGAACGACTCGACGAGCACGATCTCCGGGTGAGC
GCGCTCGCGACGCACAACAACCCGCTCCATCCCGACGACGAGCGCGCCGCCGCGGCCGACACCGAACTCC
GAGAGGCGATCGAACTCGCCGCCCAGCTGGGCGTCGACACCGTCACGACCTTCTCGGGGCTGCCCGCCGG
TGGACCGAACGACGAGGTGCCCAACTGGATCACCGCCCCGTGGCCGGCCGAGCACAAGGAGGCCCACGAT
TACCAGTGGGAGGTCGCCGAGGACTACTGGACGGAACTCGCCGCATTCGCCGACGAGCAGGGAGTCGACA
TCGCCATCGAGATGCATCCGAACATGCTCGTCTACGAGCCGACGGGGATGGAGCGACTGCGCGAGGCCAC
CAACGAGCGCATCGGTGCGAACTTCGACCCCTCGCATCTCTACTGGCAGGGCATCGACGTGCCGCGCGCG
ATCCGCTATCTCGGCGAGGCGATCCACCACGTTCACGCGAAAGATACCGGACTCTACGAGGCCAACGCCG
ACGTCAAGGGCTATCTCGACACGACACCCTACACCGAGGAGGCGGAGCGCTCGTGGCTGTTCAGAACCGT
GGGCTACGGCCACGGCGAATCCCACTGGAAGGAGGTCGTCTCGACGCTCAGAATGGTCGGCTACGACGGC
GCGCTCTCGATCGAACACGAGGACTCGCTGACGAGTTCGCGCGAGGGCCTGGAGAAGGCCGTCGACGTAC
TCTCGCGGGCGGTGTTCGCGACCACGCCCGGCGACGCCTACTGGGCGGAGTAG

>Halococcus_thailandensis-03290
ATGGCACTAAAGATCGGCGTGCTCGGCTATCGGTTTATGGGCAGGGCCCACTCGAACGCCTTCGCGCGCC
TCCCGATGTTCTTCGACGACGCGCCGGCCATCGAGCGCCACACGCTCGTCGGGCGCGACGAGGACGCGCT
GGCGGCTGCCGCGGATCGGTTCGGCTTCGCCAACACGGAGACCGATCGGGAGGCCGCCATCGACGAGGTG
GACGTCTTCTACAACCTCGGGCCGAACCATCTCCATCCCGAGCCGTCGATCGCGGCGCTCGACGCCGACG
TGCCCGTGTTCTGCGAGAAACCGCTCGCGCCCACGGTGGCAGACGCAGAGCGGATGGCCGAGGCGGCTGC
CGAGAGCGACGCGATCGCCGGCTGTGCGTTCAACTACCGGTTCGTGCCGGCCATCCAGTACGCGAAGAAC
CTGATCGACGCGGGCGAGCTCGGCGAGATCCGCCACGTGCGCGGGCGGTATCTCCAGGACTGGGGGGCCG
ACCCCGAGGACCCGTGGACGTGGCGCATGGACGAAGAACTCGCGGGCAGCGGCGCACTCGGTGATCTGGG
CGCGCACACGATCGATCTCGCGCGCTTTCTGGTCGGCGAGCAAGCTGGCGACATCGAGCACGTCAGCGGC
CACCTGGAGACGTTCATCGAGGAGCGACCCGTGGAAGGAGGCGACGAGAGCCGGCCCGTGACTGTCGACG
ACGCCTACTCGGCACAGGCCGAATTCGCGGGTGGGGTGATGGGCACCTTCGAGGCCTCGCGGATGGCGAG
CGGCCACAAGAACGATCACACCATCGCGATCCACGGCTCGGAAGGCAGTCTGAAGTTCTCGCTCGAACGG
CTGAACGAACTGGAGTTGCTCCGGGAGGGCGACAGGGGCTACGAGACCGTTCTGGTGACCGACGAGACCG
ACCCCTACGTCGAGCACTGGTGGCCGCCGGGACACGTCCTCGGCTGGGAGCACACGTTCGTCCACGAGGA
CTACGAGTTTCTCTCGGCGGTCGCCGAGGGCGAACCCTACGAACCGTCGTTCGCGACGGCCTGCGAGGTC
CAGCGCGTGCTCGGGGCCATCGAGCGTAGCGACGAGCGCGGCGAGTGGGTCGAGGTCGAATAA

>Halobiforma_nitratireducens-01338
ATGACTGACACACTCGAGGTCGGCGTGCTGGGGTATCGATTCATGGGCAAGGCACACGCGAACGCGATGG
CACGGCTGCCGATGTTCTTCCCGGACGCGCCGGAGATCGAACGCACCGTACTGGTCGGCCGCGACGAGGA
CGCCCTCGCCGACGCCGCCGACCGGTTCGGCTTCGAATCGACCGCGACCGACTGGGAAGCCGTCGTCGAC
GACATCGACGTCTTCTACAACCTCGGTCCGAACCACGTCCACCCCGAACCGTCGATCGCCGCGCTCGAGG
CGGGCACCCCCGTCTTCTGTGAGAAGCCGCTCGCGCCTACTCTCGCAGACGCCGAGCGGATGGCAGAGGC
GGCCCGCGAAGCCGGCGACGACGTGCCCGCGGGCACGGCCTTCAACTACCGGTTCGTCCCCGCGATCCAG
TACGCGAAGGGGCTGCTCGAGGACGGCGAACTCGGCGAGATCCGCCACGTCCGCGGTCGCTACCTGCAGG
ACTGGCTGGTCGATCCCGACGCACCGTGGTCGTGGCGGCTCGACGAGGAGTTGGCCGGATCGGGCGTGCT
CGGCGACCTGGGCGCACATACGGTCGACCTGGTCCGGTTTCTCGTGGGCGACGACGACCTCGCGGGTGAC
ATCGAACGGCTCAGTGGTCACTTACAGACGTTCGTCGACGAACGGCCCGTCGAAGGGAGCGAGGAGACGC
CGGGGGAGTCCGGTGGGGATGGCGATGCCGTCGAAACCCGCCCCGTCACCGTCGACGACGCCTACGCCGC
CCAACTCGAGTTCGCAAACGGCGCGATCGGTACGCTCGAGGCCTCGCGGTACGCCACGGGCCACAAGAAC
GACCATACGATCGAGATTCACGGCTCGAAGGGCAGCCTCCGGTTCTCGCTCGAGCGGCTGAACGAACTCG
AGATCCATCGTGAGGGCGACCGTGGCTACGAGACGATTCTGGTGACCGACGCGGACGATCCCTACGTGGA
TCACTGGTGGCCGCCGGGTCACGTCCTGGGGTGGGAGCATACGTTCGTCCACGAGAACTACGAGTTCCTC
TCGGCCGTGTCCGAGGGGACAGCGTTCGAACCGAGTTTCGAGGACGGCCTCGCCGTCCAGCGGCTCCTCG
CCGCGATCCAGGACAGCGACGACCGCGGCGAGTGGGTCGCCCTCGAGTAG

>Halobiforma_nitratireducens-01339
ATGGATATCGGTGTCCACACGCCGCCGCTGGCCGACGAATCGCTCGAGGGTGCGCTCGCGTACCTCGCGG
ACATCGGGGTCGACGCGATCGAACCCGGTGTCGGGGGCCACCCCGGCGAGGACCACCTTCCTCGGCGGGA
GTACCTGGACGACGAGGACGCCCAGGCCGAACTCGAGGCGGTCCTCGACGAGCACGGGATACACATCAGT
GCGCTCGCGACGCACAACAACCCCCTGCATCCCGACGAGGAGCGGGCCGAGGAGGCCGACACGGAACTGC
GGGAGGCGATCCGCCTGGCCGACCAGATCGACGTCGGCGTCGTTACCTGTTTCTCCGGCCTGCCTGCGGG
CAGTCCGGACGACGAGGTTCCCAACTGGATCACCGCGCCCTGGCCACCGGAACACGCCGAGGCCCACGAG
TACCAGTGGGACGTGGCCGTCGACTACTGGTCGGACCTGGCGGCGTTCGCCGACGACCACGAGGTCGATC
TCGCCATCGAGATGCACCCCAACATGCTCGTCTACGAGCCCCACGGGATGGCACGGCTCCGCCAAGAGAC
GAACGACCGCGTCGGCACGAACTTCGATCCCTCGCATCTGTACTGGCAGGGAGTCTCGATCACCGACGCG
ATCCGTTTTCTCGGCGAGCGCGACGCCATCCACCACTTCCACGCCAAGGACACGAAAGTCTACGAGGAAC
AGGCCCGCGAGAAGGGCGTCCTCGATACGACCGCCTACGACGACGAACTCAACCGCTCGTGGCTGTTCCG
CTCTGTCGGCTACGGCCACGACGAGTCCCACTGGAAAGACCTCGTCTCGACGCTGCGGATGGTCGGCTAC
GACGGCACCTTGAGTATCGAACACGAGGACTCCCTGACCAGCGGCCGAGAAGGTCTCGAGAAGGCCGTCG
AACTGCTCGGGCGGGCCGTCTTCCGGACTCAACCCGGCGACGCCTACTGGGCGGAGTAA

>Halorubrum_lacusprofundi-02394
ATGGGCAAGGCGCACGCGAACGCGCTCGCGCGACTCCCGATGTTCTTCCCAGACGCGCCCGACATCGAGC
GGCACACCCTCGTCGGGCGCGACGAGGAGGCGCTCGCGGACGCCGCGGAGCGGTTCGGATTCTCGCACAC
CGCGACCGACTGGGAGGACTCGCTCGACGAGGTGGACGTGTTCTACAACCTCGGCCCGAACCACGTTCAC
GCGGAGCCGTCGATCGCGGCCCTCGAAGCGGGCGTTCCGGTTCTCTGTGAGAAGCCCCTCGCGCCGACCC
TCGACGAGGCCGCGGCGATGCGCGACGCCGCGGCCGACGCCGACGTGCCCGCCGGCACCGCGTTCAACTA
TCGGTTCATCCCCGCGATCCGGTACGCGAAGGGGCTGATCGAAGACGGCGAACTCGGCGAGATCCGACAA
GTTCGTGGGCGGTACCTCCAAGACTGGCTGGTCGACCCCGAGGCGCCGTGGGCGTGGCGGATGGACGCCG
ACACGGCGGGCTCCGGCGCGCTCGGCGACCTCGGCGCGCACACGCTCGACCTCGCGGACTTCCTCGTCGG
CGACGAGGTCGGCGAGATCGATCGCGTCTCGGGCCACCTCCAGACGTTCGTCGACGAGCGGCCCGTCTAC
GACGAGGCTGGCGACGTCGAGGAGTATCGCGACGTGACCGTCGACGACGCCTACACCGCGCAGGTCGCCT
ACGAGTCGGGCGCGATGGGGAGCTTCGAGGCGACCCGATTCGCGGAGGGCCACAAGAACGACCACGCGAT
CGAAATCCACGGCTCGAAGGGGAGCTTGAAGTTCTCCTTGGAGCGGCTCAACGAGCTGGAGGTGCTCCGG
GAGGACGACCGCGGGTACCAGACAGTGCTCGTCACCGACGAGACCGACCCGTACGTCGACCACTGGTGGC
CGCCGGGTCACGTCATCGGCTGGGAGCACACGTTCGTCCACGAGAACTACGAGTTCCTCTCGGCGGTCGC
CGAGGGCGGCGAGTTCGAGCCGTCGTTCGAACAGGGGTACAAGGTGCAAAAACTCCTCGACGCGGTCGAA
CGCGCCGACGAGCGCGGGGAGTGGGTGTCGGTGGAGTAG

>Halorubrum_lacusprofundi-02395
ATGGACATCGGTGTGCTAACCGTCCCCTTAGGCGGCGAATCGATCGACGACGCGGTCGCGTACCTCGACG
ATATCGGCGTCGACGCCGTCGAACTCGGCGTCGGCGGGTGGCCCAGCGAGGACCACGTCGACCGCGAGGC
GATACTCGACGACGACGCGGCGCAGGCGGAGCTTCGGGAGCTACTCGACGAACACGGCCTCCGGATCTCC
GCGCTCGCGACCCACAACAACCCCCTCCACCCCGACGAGGAGCGCGCCGCGGCGGCCGACCGAGAGCTCC
GCGAGGCGATCGAGCTTGCCGACCAGCTGGACGTGGGCACGGTCACCTGTTTCTCCGGCCTTCCTGCCGG
CGCGCCGGGCGACTCGACGCCGAACTGGATCACGGCGCCGTGGCCGAGCGAACACGCCGACGCCCACGAG
TATCAATGGGACGAGGTCGCGATCCCGTACTGGACGGATCTGGCGAAACACGCAGACCACCACGGGGTGG
ATGTCGCCATCGAGATGCACCCGAACATGCTCGTGTACGAGCCGACCGGCATGCTCGCGCTCCGGGAGGC
CACGAACGAGCGGATCGGCGCCAACTTCGACCCCTCGCACCTCTACTGGCAGGGGATCGACGTGATCGAG
GCGATCCGATTTTTGGGCGACCACGACGCGATCCACCACTTCCACGCGAAGGACACCAAGGTGTACGACG
CGAACGCGCGCGTGAAGGGCGTACTCGACACGACGAGCTACACCGACGAGAGCGATCGCTCGTGGCTGTT
CCGTTCGATCGGTTACGGCCACGACGAGAGCCACTGGAAGGACGTCGTCTCGACGCTCCGGATGGTCGGG
TACGAGGGCGCGCTGTCGATCGAACACGAGGACTCGCTGACCTCCTCGCGGGAGGGGTTAGAGAAGGCGG
TCGACGTGCTCGACCGCGCCGTCTTCGAGACGCAACCGGGCGACGCCTACTGGGCGGAGTAA

>Natronobacterium_gregoryi-03742
ATGACTGAACCACTCGAAGTCGGTGTACTCGGTTATCGGTTCATGGGTAAAGCACACGCGAACGCGATGG
CACGGCTGCCGATGTTCTTTCCGGACGCGCCAGACGTCTCCCGTTCTGTGCTGGTCGGCCGGGACGAGGA
CGCACTCGAGGAGGCGGCCGACCGCCTGGGCTTCGACTCGATTTCGACCGACTGGGAGGCGGTCGTCGAC
GACGTCGACGTCTTCTACAATCTCGGGCCGAACCACGTCCACCCCGAGCCGTCGATCGCGGCGCTCGAGG
CGGGCACCCCCGTCTTCTGCGAGAAACCGCTCGCGCCGACGCTCGACGACGCCGAGCGGATGGCCGACGC
CGCTGCTGAGGCCGGCGTCCCCGCAGGAACCGCGTTCAACTACCGGTTCGTCCCCGCGATCCAGTACGCG
AAGGCGCTGCTCGAGGACGGCGAACTCGGCGAGATCCGCCACGTCCACGGTCGCTATCTGCAGGACTGGC
TGGTCGATCCCGACGCGCCGTGGTCGTGGCGACTCGACGAGGAGTTGGCTGGCTCGGGCGTGCTCGGCGA
CCTCGGTGCCCACACGGTCGATCTGGTCCGGTTTCTGGTGGGCGACGACGACCTCGCGGGCGACATCGAA
CGGCTCAGTGGCCACTTACAGACGTTCGTCGACGAGCGCCCTGTCGAGGACGGAAGCGCCGAGACTCCGG
AGGAGTCTCGTGGAGACGGCGACGCCGTCGAAACCCGCCCCGTCACCGTCGACGACGCCTACTCTGCCCA
GCTCGAGTTCGCAAACGGTGCCGTCGGCACGCTCGAGGGATCGCGGTACGCGACGGGCCACAAGAACGAC
CACACGATCGAGATCCACGGCTCGCAGGGCAGTCTACGGTTCTCGCTCGAGCGACTGAACGAACTCGAAG
TCCACCGCGAGAGCGACCGTGGCTACGAGACGATCCTGGTGACCGACGCGGACGATCCGTACGTCGACCA
CTGGTGGCCACCGGGACACGTCATCGGCTGGGAGCACACGTTCGTCCACGAGAACTACGAGTTCCTCGCT
GCGGTCGCGGGGAGCGAGGCGTCACAGACGCCTCGAAACGAGGACGGTGAAACCGCCGGAGAGGACGGCG
AGTTCGAACCGAATTTCGCCGATGGGCTCGCAGCCCAGCGCGTCCTCGAGCGAGTCGTCGAGAGCGACGA
GCGCGGCGAGTGGCTGACGCTAGAGTAA

>Natronobacterium_gregoryi-03743
ATGGATATCGGGGTACACACTCCACCGCTCGCTGACGAATCGCTCGAGGGTGCACTCGACTACCTCTCGG
AGATCGGCGTCGACGCGATCGAACCCGGCGTCGGTGGGTTCCCGGGGCAGGACCACCTCTCACGCGAGGA
GTACCTCGACGACGAGGACGCCCAGGCCGAACTCGACGACCTGCTCGAGGAGTACGAGATGCACGTCAGT
GCACTCGCAACCCACAACAATCCGCTCCATCCCGACGACGAGCGAGCGGCGGAAGCCAATACGGAACTCC
GGGAGGCGATCCGGCTGGCCGACCAGATCGACGTCGACGTCGTCACCTGTTTTTCCGGGCTGCCCGCGGG
CGGACCCGAAGACGAGGTTCCCAACTGGATCACGGCACCGTGGCCGACCGAACACGCCAAAGCCCACGAG
TACCAGTGGGACGTCGCTGTCGACTACTGGTCTGACCTGGCGGCGTTCGCCGACGATCACGGCATCGACC
TCGCCATCGAGATGCACCCCAACATGCTCGTCTACGAGCCCCACGGGATGGCGAGACTCCGCGAGGAGAC
CAACGACCGCGTCGGCGCGAACGTCGACCCCTCGCACCTGTACTGGCAGGGGATCTCAATCACCGACGCG
ATCCGCTTCCTCGGCGAGCACGACGCGATCCACCACTTCCACGCCAAGGACACGAAAGTCTACGAGGAAC
AGGCCCGCGAGAAAGGCGTCCTCGACACGACCGCCTACGACGACGAACCCAACCGCTCGTGGCTGTTCCG
CTCGGTCGGTTACGGCCACGGCGAGTCCCACTGGAAGGACCTCGTCTCGACGCTGCGGATGGTCGACTAC
GACGCCACCTTGAGCATCGAACACGAGGACTCGCTGACCAGCAGTCGAGAGGGCCTCGAGAAAGCCGTCG
AACTGCTCGAGCGTGCCGTCTTCCGGACGCAGCCGGGCGAGGCCTACTGGGCGGAGTGA

>Halosarcina_pallida-02430
ATGGCGCTCGACATCGGAATCCTCGGCTACCGTTTCATGGGCAAAGCCCACTCGAACGCATTGGCGCGAC
TGCCGATGTTCTTCCCGGACGCCCCGGAGATAAATCGGCACACCCTCGTCGGCCGCGACGAGGAGGCCCT
CGCCGAGGCGGCCGACGAACTCGGCTTCGAGCACACCTCGACCGAGTGGGCGGACGTGATAGACGAGGTG
GACGCCTTCTACAACCTCGGTCCCAACCACGTCCACGCCGAACCCTCCATCGCCGCCCTCGAAGCCGGCA
CGCCCGTCTTCTGCGAGAAACCGCTCGCGCCCACCCTCGACACCGCCGAGGAGATGCGCGACGCCGCCGC
GGACGCGGACGTTCCCGCGGGCAACGCGTTCAACTACCGCTTCGTCCCCGCCATCCAGTACGCGAAGGGG
CTCATCGACGACGGCGAACTCGGCGATATTCGACAGGTTCGCGGGAGCTACCTGCAGGATTGGCTCGTCG
ACCCCGAGGCGCCGTGGTCGTGGCGCAACTCGAAGGAACTGGCCGGAAGCGGCGCGCTGGGCGATTTGGG
CGCGCACACGGTCGACCTCGCGCGGTTCCTCGCCGGCGACGCCGCGGGCGAGATAGCGCGCGTCTCCGGG
CACCTGAAGACGTTCGTCGACGAACGACCCGTCGAGGGCGAAGAGGAGACGCGGGAGGTCACCGTCGACG
ACGCCTACACGGCGCAGGCGGAGTACGAGAACGGCGCGACGGGCACCTTCGAGGCGTCCCGCGTCGCCGA
CGGGCACAAGAACGACCACACGATTCAGATCCACGGCACGGACGGCAGCCTGAAGTTCTCCTTGGAACGG
CTGAACGAGTTGGAGTACAAGCGCGCTGACGGGCGGGGCTACGAGACGATTCTGGTGACGGACGGGTCGG
ACCCCTACGTCGAACACTGGTGGCCGCCGGGGCACGTCCTCGGCTGGGAGCACACGTTCGTCCACGAGAA
CTACGAGTTCCTCTCGGCCGTGCGCGACGGCGAGGAGTTCCGCCCCTCCTTCGAGGACGGCTACGAGGTC
CAGCGAATCCTCAACGCCGTCGAACGCTCCGACGAGAGCGGTCAGTGGGTCGAACCCTGA

>Halosarcina_pallida-02431
ATGTACATCGGCGTACTCACGGTTCCGCTCGGCGGCGAATCGCTCCCGGACGCGCTCTCGTACCTCGACG
ACATCGGCGTCGACGGCGTCGAACTCGGAGTCGGGGGCTTCCCCGGCGACGACCACCTCGACCGGCGCGC
GGCCCTCGACGACGAGGGGAAGCGAGAGGAACTCCTCGACCTCGCGGACGAACACGACATGCAGATAAGC
GCGCTGGCGACGCACAACAACCCGCTGCACCCCGACGAGGAGGAGGCCGACGAGGCCGACACGGAACTGC
GCGAGGCCATCGAACTCGCGGACGCCTTGGATGTGAACACCGTCACCTGCTTCTCCGGCCTCCCCGCCGG
CGGCCCGAACGACGAGGTGCCGAACTGGATTACGGCGCCGTGGCCGACCGAGCACGCCGACGCCCGCGAC
TACCAGTGGGAGGTCGCCGTCGACTACTGGTCGGACCTCGCGGAGTTCGCCGACGACCACGGCGTCGACG
TCGCCATCGAGATGCACCCGAACATGCTCGTCTACGAGCCGTCGGGCATGATGCAACTGCGCGAGGCGAC
GAACGAGCGCATCGGCGCGAACTTCGACCCCTCGCACCTCTACTGGCAGGATATCGATATCTGCCACGCC
ATCCGCTTCCTCGGCGAGAAGGACGCCATCCACCACTTCCACGCGAAGGACACGAAGGTGTACTCGTGGA
ACTCGCGGCTGAAGGGCGTCCTCGACACCACCGACTACACCGACGAGTCGAACCGCTCGTGGCTGTTCCG
CTCCATCGGCTACGGCCACGGCGAGAGCCACTGGAAGGACGTGGTGTCGACGCTCCGCATGGTCGGTTAC
GAGGGCGCGTTGTCCATCGAACACGAGGACTCGCTGACCTCCTCGAACGAGGGACTGGAGAAGGCCGTCG
ACATCCTCGACCGTGCCGTGTTCGACACGCAACCGGGCGAGGCGTACTGGGCGGAGTGA

>Halovivax_asiaticus-02251
ATGGCACTCGACGTCGGCGTCCTCGGCTACCGGTTCATGGGTACCGCCCACGCCAACGCGTTCGCCCGGC
TCCCGATGTTCTTTCCCGACACACCGGCCGTCACGCGTGACGTCTTGATCGGGCGTGACGAAGAGGCCCT
GGAGAACGCGCGGACGCGACTCGGGTTCGATCGGACGGCGACCGACTGGCGATCGGTCGTCGACGAGGTC
GACGTCTTCTACAATCTCGGACCGAACTTCCTGCACGCTGAACCGTCGATCGCGGCGCTCGAGGCCGGCG
TCTCGGTCTTCTCAGAGAAACCGCTGTCGGCGACGCTCGACGGCGCCACTGAGATGGCAGCAGCCGCCCG
TTCGGCCGGTGTGCCGACGGCGTGTGGCTTCAACTACCGGTTCGTTCCGGCGATTCGATACGCGCGCGAA
CTGATTCAGTCCGGCACGCTCGGCGACATTCGGACCTTCCGTGGACGCTACCTGCAGGACTGGCTCGTCG
ATCCGGAGGCACCGTGGTCCTGGCGGCTCGACGCGGAGTTGGCCGGTTCCGGTGCGCTCGGTGACCTTGG
CGCACATACGGTCGATCTCGCCCGATTCCTCGTCGGAGATGCACCCGGTGCCGGTCGGATCGAACGCGTG
AGCGGGCATCTGCGAACGGCCGTGACGGAACGACCCGTGGAAGACGCTCCTGGCGAAACCCGACCCGTGA
CCGTGGACGACGAGTACACCGCCCAGCTCGCGTTCGAAGGCGGCGCGACCGGCATCCTCGAAGGCTCTCG
GATCGCTCCGGGTCACAAGAACGACCATACGATCGAAATCCACGGGAGCGAGGGAAGTCTCCGATTCTCG
CTCGAGCGACTCAACGAGCTAGCGGTGCTCGGCCAAGACGACCGAGGGTACGAGACCGTTCTCGTCACCG
ACGAAAGCGATCCCTACATCGATCACTGGTGGCCACCGGGCCACGTCCTCGGGTGGGAACACACGTTCGT
CCACGAGAACGCATCGTTCTTGCAGGCCATCGCCGATGGAGCGGCGTACGAGCCGTCGTTCGCGGACGGT
CTGGCTGCCCAGCAGGTCCTCGCCGCGATCGAAGCCAGCGACGAGTCGGGATCCTGGGAGCGGGTTTTAC
GAGACGAGTGA

>Halovivax_asiaticus-02252
ATGGATCTGGGTGTACACACGCCGGCGCTGGCAGATCGATCGTTCGAGGATGTCCTCGAATATCTGTCCG
ACTTCGGTGTCTCCGCCGTCGAACCCGGTGTCGGCGGCTTTCCCGGAGACGACCACGTGGCGCGAGCGAC
GTACCTGAACGACGACGAAGCGCAGATTGAACTTCGGGACGCCCTCGATCGTTACGGGATACGAATCAGT
GCCCTTGCGACGCACAACAATCCACTCCACCCGGACGAGGCACGTGCATCACGGGCCGACACCGAACTTC
GGGAGGCGATTCGCCTGGCTGCCCAGCTCGATGTCTCGACGGTGACGTGCTTCTCCGGGCTTCCGGCGGG
GAGCCCGGACGACGAGACGCCGAACTGGATCACGGCACCGTGGCCGCCCGAACACGAATCCGCGCTTTCC
TACCAGTGGAACGTCGCGATCGAGTACTGGGAAGAAATTGCCTCGGTCGCCGACACCCACGGCGTCGACG
TGGCGATCGAGATGCATCCGAACATGCTCGTGTACGAGCCGACGGGACTGCTGCGACTACGTGACGAAAC
GGGTCCGCGAATCGGTGCCAATTTCGATCCCTCGCACTTCTACTGGCAGGGTATCTCGATCACCGACGCG
ATCCGGGCGCTCGGGGAACACGACGCGATCCACCACGTCCACGCAAAGGATACGCGCCGGTACGACGCCA
ACGTGCGAGTGAAAGGGGTCCTCGACACGACGCCGTTCGACCGAGAACGCGACCGTTCGTGGCTGTTTCG
CTCCGTCGGCTACGGCCACGGCGCTCGCCACTGGAAGGACGTCGTCTCGACGTTGCGCCTCGTCGGCTAC
GACGACGCCATCAGCATCGAGCACGAGGATTCGCTAACGAGTTCCGAAGACGGTCTCGAGAAGGCCATCG
AGTTTTTGGCGCCGATCGTCTTCGAGGGCGAACCCGACGCCCCGTTCTGGACCGAAGGCATCGACTGA

>Halococcus_saccharolyticus-01610
TTGCGAATCGGCGTTCTCGGCTATCGATTCATGGGCAAGGCTCATTCGAACGCGTTCACGCGACTCCCGA
TGTTCTTCCCCGACGCGCCCGACATCGAGCGTCACACCCTCATTGGCCGCGACGAGGACGCACTCGCGGA
CGCTGCGGACCAGCTGGACTTTTCCAACACCGCGACCGACTGGGAGTCTGTAATCGACGAGGTGGACGTC
TTCTACAACCTCGGGCCGAACTTCGTCCATCCCGAACCCTCGATCGCCGCACTCGAAGCCGATGTCCCCG
TCTTCTGCGAGAAACCGCTCGCACCGACCCTCGATGACGCCGAGCGGATGGCTGCGGCGGCCGACGCGAG
CGACGCGATCGCCGGGTGTGCGTTCAACTACCGCTTCGTACCTGCGATCCAGTACGCGAAAAACCTGGTC
GACGACGGCGAGATCGGCGCGATCCGCCAGGTCCGCGGGAAGTATCTCCAGGATTGGGGCGTCGACCACG
AAGAGCCGTGGTCTTGGCGGATGGACGAGGACCTTGCCGGCAGCGGTGCGCTCGGCGACCTTGGCGCACA
CACGATCGACCTCGCACGATTCCTCATCGGTGACCGCGCGGGCGAAATCGAGCGCATCAGCGGCCACCTC
CGGACGTTCGTCGACGAGCGACCAGTGGAAGGCGAGGAGAGCGAGGACGCGCGCGCGGTGACCGTCGACG
ACGCCTACTCCGCCCAGGCCGAATTCGCGAACGGCGCGATGGGCACCTTCGAGGCCTCGCGGGTCGCCGA
CGGCCACAAGAACCACCACACGATCGCGGTTCACGGCACCGAGGGCAGCCTCCGGTTCTCGCTCGAACGT
CTCAACGAACTCGAACTGCTCCGCGACGGCAACCGGGGTTACGAGACGATGCTCGTGACCGACGCCGACG
ACCCCTACGTCGATCACTGGTGGCCGCCGGGCCACGTCCTCGGCTGGGAGCACACCTTCGTTCACGAGGA
CTACGAGTTCCTGTCGGCAATCGATCAGGAAGAAGCGTTCCACCCCTCGTTCGCCGACGGTCTTGCGGTA
CAGCGCGTCCTCGACGCCATCGAGCGCAGCGACGACCGCGGCGAGTGGGCGGCGGTCGAAGCATGA

>Halococcus_saccharolyticus-01611
ATGGACATCGGCGTACTTACCGTGCCGTTCGGCGACCAGCCGCTCGACGAGACCTGCGAGTACCTCGCTG
GCCTCGGGGTCGACACGGTCGAACTCGGCTGTGGCGGGAGTCCCGGCAACGACCACCTCGCGCGCGAGGA
GTATCTCGACGACGAGGACGCCCAGGCCGACCTCCACGATCTGCTCGACGAGCACGACCTCCGAATTTCG
GCGCTCGCGACCCACAACAACCCGATCCATCCCGACGACGATCAGGCCGAGACGGCGGACGAGGAACTTC
GGGAGGCGATCGAACTGGCGGCTCAGCTCGGCGTGGATACCGTCACCACGTTCTCGGGACTGCCCGGCGG
CGGCCCGAACGACGAGGTGCCGAACTGGATCACCGCGCCGTGGCCCACCGAGCACAAGGAGGCTCACGAC
TACCAGTGGGGGGTCGCCGAGGAGTACTGGACCGACCTCGCCGACTTCGCCGACGACCACGGCGTGAACG
TCGGGATCGAGATGCACCCCAACATGTTGGTGTACGAGCCGACAGGAATGGAGCGGCTGCGCGAAGCCAC
CAACGACCGGATCGGCGCGAACTTCGATCCCTCGCATCTCTACTGGCAGGGAATCGACGTTCCTGCGGCG
ATCCGGTACCTCGGCGACGCGATCCACCACGCCCACGCGAAGGACACCGGTCTCTACGAGTCGAATGCGC
GGGTCAAGGGTCACCTCGACACGACGCCGTACACCGAGGAGGAAGACCGCTCGTGGCTCTTCCGAACCGT
CGGCTACGGTCACGGCGAATCCCACTGGAAAGAGGTCGTCTCCACCCTGCGGATGGTGGGCTACGACGGC
GCGCTCTCGATCGAACACGAGGACTCGCTCACGAGTTCGCGCGAGGGGCTGGAGAAGGCGGTCGACGTGC
TCGACAGGGCGGTGTTCGAGACGACGCCTGGCGACGCCTACTGGGCGGAGTAG

>Natronorubrum_sulfidifaciens-00392
ATGACGCTCGAAGTCGGTGTACTCGGCTATCGGTTTATGGGGAAAGCCCACGCAAACGCCCTGTCGCGGC
TCTCGATGTTCTTCCCGGACGCACCGGAGGTCGAGCGCAGCGTGCTCGTCGGCCGCGACGAAGACGCCCT
TTCGGACGCAGCGGACCAGCTCGGATTCGAGTCGATCGCGACCGACTGGGAAGCCGTCGTCGACGACGTC
GACGTCTTCTACAATCTCGGGCCGAACCACGTCCACGCAGAGCCCTCGATCGCTGCCCTCGAGGCCGGAA
CGCCGGTCTTCTGTGAGAAACCCCTCGCGCCGACGCTTGCCGAGGCCGAACGAATGGCCGACGCCGCCGC
CGAGGCTGGCGTTCCCAACGGTACCGCGTTCAACTACCGCTTCGTCCCCGCGATCCAGCACGCAAAGGGG
CTGCTCGAGGCCGGCGAACTTGGCGAGATTCACCACGTCCGCGGGCGATACCTCCAGGACTGGCTGGTCG
ATCCCGAGGCCCCGTGGTCGTGGCGAAACGACGCGGAGATGGCAGGGTCGGGTGCCCTGGGCGACCTCGG
CGCGCACACGGTCGATCTGCTTCGCTTTCTCGTCGGCGACGACGACCTCGCCGGCGAGATGGAACGCGTC
AGCGGCCACCTCCAGACGTTCGTCGACGAGCGACCTGTGGACGGAAGTGATGAGATGCGATCCGTGACCG
TCGACGACGCCTACTCCGCGCAGGTCGAGTTCGAACACGGCGCGATGGGGACTCTCGAGGCCTCCCGGTT
CGCGACGGGGCATAAAAACGACCACACGATCGAGATCCACGGCTCGAAGGGCAGCCTGCGATTCTCCCTC
GAGCGACTGAACGAACTCGAGGTCATGCGGGCCGACGAGAATCGCGGCTACGAGACGGTGCTGGTCACCG
ACGAGGACGATCCGTACGTCGACCACTGGTGGCCGCCGGGACACGTGCTGGGCTGGGAGCACACCTTCGT
CCACGAGAACTACGAGTTCCTCAGCGCAGTGGCAAGCGGCGATACGTTCGAACCCAGCTTCGCGGATGGT
CTCGCCGCCCAGCGCGTGCTCGCAGCGATCGAAGCGAGCGACGAGAAACGTGAGTGGGTTTCGATCAGCT
AG

>Natronorubrum_sulfidifaciens-00393
ATGGATATCGGCGTTCACACCCCGCCACTGGCAGACGAATCGCTCGAGGGAGCCCTCGAATACCTTTCTG
AGATCGGCGTCGACGCAATCGAACCCGGCGTCGGCGGCTACCCTGGCGACGCCCACCTCGTCCGCCGAGA
CTACCTCGACGACGAGGACGCACAGGCCGAATTACACGACCTGCTCGCGGAGTACGACATGCGCGTCAGC
GCACTCGCAACGCACAACAATCCACTCCACCCGGACGACGAGCAGGCCGAAACCGCGGATACCGAACTGC
GCGAAGCGATCCGTCTCGCCGACCAGCTCGGCGTCGACACCGTCACCTGCTTTTCGGGCCTGCCAGCCGG
TGGTCCCGACGACGAGGTGCCGAACTGGATCACCGCGCCGTGGCCGAGCGAACACGCCGACGCCCACGAG
TACCAGTGGGACGTTGCGATCGAGTACTGGGCCGACCTCGCGGCGTTCGCCGACGACCACGGCGTCGACC
TCGCGCTCGAGATGCACCCCAACATGCTCGTCTATGAACCCCACGGGATGGCTCGCCTGCGCGAGGCGAC
GAACGAACGCGTCGGTGCGAACTTCGACCCCTCACACCTGTACTGGCAGGGGATTTCGATCACCGACGCG
ATCCGCTATCTCGACGACGCGATCCACCACTTCCACGCCAAGGACACGCGGATCTACGAGGAGCAGGCCC
GGGAGAAAGGCGTTCTCGACACGACTGACTACGACGACGAGCCCAACCGGTCGTGGCTGTTCCGCTCGGT
CGGCTACGGCCACGGCGAAGACCACTGGAAAGACGTCGTCTCGACGCTGCGAATGGTCGGCTACGACGGT
GCCCTGAGCATCGAACACGAGGACTCGCTGACGAGTTCGCGGGAAGGCCTCGAGAAGGCAGTCAACCTCC
TCGAGCGTGCGGTTTTCCGCGAACAGCCCGGCGAGGCGTACTGGGCCGAGTAG

>Halogeometricum_borinquense-01163
ATGACGCTCAACGTCGCCGTCCTCGGCTACCGGTTCATGGGTAAGGCGCACTCGAACGCGCTCGCGCGTC
TCCCGATGTTCTTCCCCGACGCGCCCGATGTCCACCGCCACACGCTCATCGGCCGCGACGAGGAGGCGCT
CGCCAGCGCCGCCGACGAACTCGGCTTCGAACACACCGCGACGGACTGGGAATCGGTCGTAGACGAAGTT
GACGCCTTCTACAACCTCGGACCGAACCACATCCACGCGGAGCCATCCATTGCCGCGCTGAAGGCCGACA
CGCCAGTCTTCTGCGAGAAACCGCTCGCGCCGACGCTGGACGAGGCCGAGAAGATGCGTGATGCCGCCGC
CGACTCCGACGCCATCGCCGGATGTGCCTTCAACTACCGGTTTGTCCCGGCGATTCAATACGCGAAGGGA
CTGATCGACGACGGAACACTCGGCGAGATTCGTCACGTCCGCGGGAGCTACATGCAGGATTGGCTAACAG
ACGCTGACGCTCCGTGGTCGTGGCGGAACGATGCGAAACTCGCCGGAAGCGGCGCGTTGGGCGACCTCGG
CGCGCATACAATCGACCTCGCACGCTTCCTCGTCGGTGATGTCGCGGGTGACATCGAACGTATCTCCGGG
AATTTGCAGACGTTCGTAGCAGAGCGACCCGTCGAGGGAACAGACGAAACGCGACCGGTGACGGTTGACG
ACGCCTACTCCGCGCAGGCGACGTTCGAGAACGGTGCGATGGGAACGTTTGAGGCGTCACGCGTCGCCGA
TGGGCACAAAAACGACCACACGATCCGGATTCACGGCTCCGAGGGGAGTCTACGGTTCTCACTCGAACGG
CTGAACGAACTGGAGTACAAAGGTGCCGACCATCGGGGCTACGAAACGATTCTCATGACCGACGCGGACG
ACCCGTACCTCGACCACTGGTGGCCACCGGGACACGTTCTCGGCTGGGAACACACGTTCGTCCACGAAAA
CTACGAATTCCTTTCGGCCATCCGCGACGGGGTGGCGTTCTCTCCCTCCTTCGAGGCTGGGTACGCAGTC
CAGCAGATTCTGGACGCAATCGAGCGGTCGGACGACAGCGGCGAATGGGTTTCGCTCTGA

>Halogeometricum_borinquense-01164
ATGTACATCGGCGTACTCACCGTTCCGCTCGGTGGCGAATCGCTCGCCGACGCGCTCTCGTATCTGGACG
ATATCGGCGTTCAGGGCGTCGAGATCGGTGTCGGCGGTTTTCCGGGCGACGACCATCTCGACAGGCGTGC
GTACCTCGGCGACGAGTCCAAGCAGGCGCAACTGCACGACCTGTTAGACGAACACGACATGCAGGTGAGC
GCGCTCGCCACGCACAACAACCCGCTGCATCCGGACGAGGAGACGGCCGAGGAAGCGGACACCGAACTCC
GCGAAGCCATCGAACTGGCCGCGCAGTTAGATGTAAACACCGTCACCTGCTTTTCGGGGCTTCCGGCGGG
CGGCCCGAACGACGAGGTGCCGAACTGGATCACGGCCCCGTGGCCGACCGAGCACGCCGACGCCCACGAG
TACCAATGGGATGTCGCAATCGAGTACTGGTCTGCCCTCGCCGAATTTGCCGACGACCACGGCGTCGATA
TGGCCATCGAGATGCACCCGAACATGCTCGTCTACGAACCGACGGGGATGCTGAAACTGCGCGAAGCGAC
CAACGACCGAATCGGCGCGAACTTCGACCCCTCGCACCTTTACTGGCAGGGAATCGAGGTGACCGACGCG
ATTCGGTTCCTCGGTACGGAAGATGCGATTCACCATTTCCACGCGAAGGACACGAAAGTGTACGAACCCA
AGTCGCGCATCAAAGGCGTCCTCGACACCACCGACTACGCCGACGAACCGAACCGCTCGTGGCTGTTCCG
CTCTATCGGCTACGGTCACGGCGAAAGTCACTGGAAGGACGTGGTCTCGACGCTCAGAATGGTCGGCTAC
GAGGGCGCACTTTCCATCGAACACGAGGACTCGCTCACCTCGTCCAGAGAGGGCCTCGAAAAGGCAGTGG
ATGTACTCGGACGCGCGGTCTTCGACACCAAACCCGGCGAGGCCTACTGGGCAGAGTAG

>Halogeometricum_borinquense_DSM_11551-03411
ATGACGCTCAACGTCGCCGTCCTCGGCTACCGGTTCATGGGTAAGGCGCACTCGAACGCGCTCGCGCGTC
TCCCGATGTTCTTCCCCGACGCGCCCGATGTCCACCGCCACACGCTCATCGGCCGCGACGAGGAGGCGCT
CGCCAGCGCCGCCGACGAACTCGGCTTCGAACACACCGCGACGGACTGGGAATCGGTCGTAGACGAAGTT
GACGCCTTCTACAACCTCGGACCGAACCACATCCACGCGGAGCCATCCATTGCCGCGCTGAAGGCCGACA
CGCCAGTCTTCTGCGAGAAACCGCTCGCGCCGACGCTGGACGAGGCCGAGAAGATGCGTGATGCCGCCGC
CGACTCCGACGCCATCGCCGGATGTGCCTTCAACTACCGGTTTGTCCCGGCGATTCAATACGCGAAGGGA
CTGATCGACGACGGAACACTCGGCGAGATTCGTCACGTCCGCGGGAGCTACATGCAGGATTGGCTAACAG
ACGCTGACGCTCCGTGGTCGTGGCGGAACGATGCGAAACTCGCCGGAAGCGGCGCGTTGGGCGACCTCGG
CGCGCATACAATCGACCTCGCACGCTTCCTCGTCGGTGATGTCGCGGGTGACATCGAACGTATCTCCGGG
AATTTGCAGACGTTCGTAGCAGAGCGACCCGTCGAGGGAACAGACGAAACGCGACCGGTGACGGTTGACG
ACGCCTACTCCGCGCAGGCGACGTTCGAGAACGGTGCGATGGGAACGTTTGAGGCGTCACGCGTCGCCGA
TGGGCACAAAAACGACCACACGATCCGGATTCACGGCTCCGAGGGGAGTCTACGGTTCTCACTCGAACGG
CTGAACGAACTGGAGTACAAAGGTGCCGACCATCGGGGCTACGAAACGATTCTCATGACCGACGCGGACG
ACCCGTACCTCGACCACTGGTGGCCACCGGGACACGTTCTCGGCTGGGAACACACGTTCGTCCACGAAAA
CTACGAATTCCTTTCGGCCATCCGCGACGGGGTGGCGTTCTCTCCCTCCTTCGAGGCTGGGTACGCAGTC
CAGCAGATTCTGGACGCAATCGAGCGGTCGGACGACAGCGGCGAATGGGTTTCGCTCTGA

>Halogeometricum_borinquense_DSM_11551-03412
ATGTACATCGGCGTACTCACCGTTCCGCTCGGTGGCGAATCGCTCGCCGACGCGCTCTCGTATCTGGACG
ATATCGGCGTTCAGGGCGTCGAGATCGGTGTCGGCGGTTTTCCGGGCGACGACCATCTCGACAGGCGTGC
GTACCTCGGCGACGAGTCCAAGCAGGCGCAACTGCACGACCTGTTAGACGAACACGACATGCAGGTGAGC
GCGCTCGCCACGCACAACAACCCGCTGCATCCGGACGAGGAGACGGCCGAGGAAGCGGACACCGAACTCC
GCGAAGCCATCGAACTGGCCGCGCAGTTAGATGTAAACACCGTCACCTGCTTTTCGGGGCTTCCGGCGGG
CGGCCCGAACGACGAGGTGCCGAACTGGATCACGGCCCCGTGGCCGACCGAGCACGCCGACGCCCACGAG
TACCAATGGGATGTCGCAATCGAGTACTGGTCTGCCCTCGCCGAATTTGCCGACGACCACGGCGTCGATA
TGGCCATCGAGATGCACCCGAACATGCTCGTCTACGAACCGACGGGGATGCTGAAACTGCGCGAAGCGAC
CAACGACCGAATCGGCGCGAACTTCGACCCCTCGCACCTTTACTGGCAGGGAATCGAGGTGACCGACGCG
ATTCGGTTCCTCGGTACGGAAGATGCGATTCACCATTTCCACGCGAAGGACACGAAAGTGTACGAACCCA
AGTCGCGCATCAAAGGCGTCCTCGACACCACCGACTACGCCGACGAACCGAACCGCTCGTGGCTGTTCCG
CTCTATCGGCTACGGTCACGGCGAAAGTCACTGGAAGGACGTGGTCTCGACGCTCAGAATGGTCGGCTAC
GAGGGCGCACTTTCCATCGAACACGAGGACTCGCTCACCTCGTCCAGAGAGGGCCTCGAAAAGGCAGTGG
ATGTACTCGGACGCGCGGTCTTCGACACCAAACCCGGCGAGGCCTACTGGGCAGAGTAG

>Haloferax_alexandrinus-01368
ATGACTGACCCACTCTCTATCGGCGTCCTCGGCTACCGATTCATGGGGAAGGCGCACTCCAACGCGCTCG
CCCGCCTGCCGATGTTCTTCCCCGACGCGCCCGACGTGGAGCGCTCCGTCATCGTCGGCCGCGACGAGGA
GGCGCTTTCCGACGCGGCGGAGCGCTTCGGCTTCGAATCGACCGCGACCGACTGGCGCGACGTGGTCGAC
GACGTGGACGTGTTCTACAACCTCGGCCCGAACCACCTCCACGCCGAACCCTCCATCGCCGCGCTCGAAG
CCGGTGCCAGCGTCTTCTGCGAGAAGCCGCTCGCGCCGACGCTCGACGAGGCCGAGGCGATGCGCGACGC
CGCCCGCGCGGCCGACGGCGTCGCCGGCTGTGCGTTCAACTACCGCTTCGTGCCCGCCATCCGGTACGCC
AAGCGACTCATCGAGAGCGGCGAACTCGGCGAGATTCGACACGTTCGCGGGCGCTACTTGCAGGATTGGC
TCGTCGACGCCGACGCGCCGTGGACGTGGCGCATGGACGAAGACGCCGCCGGCTCCGGCGCGCTCGGTGA
CCTCGGCGCGCACACCATCGACCTCGTTCGGTTCCTCGTCGGTGACCGCGCCGGCGACATCGACCGCATC
TCGGGGCATCTCCAGACGTTCGTCGACGAGCGGCCCGTCCCCGGCGAGGACGAGTACCGGCCCGTGACCG
TCGACGACGCCTACACCGCGCAGGCCGAGTTCGAAAACGGCGCGGTCGGGAGCTTCGAGGCCTCGCGCTT
CGCAGACGGCCACAAGAACGACCACACCATCGAGATTCACGGCTCCGAGGGCAGCCTTCAGTTCTCGCTC
GAACGCCTCAACGAACTGGAGGTGAAAACCGGCGACGCCCGCGGCTACGAGACGGTGCTCGTCACCGACG
AGGACGACCCCTACCTCGACCACTGGTGGCCGCCGGGCCACGTCCTCGGCTGGGAACACACGTTCGTCCA
CGAGAACTACGAGTTCCTGTCGGCGGTCGCCGGCGGCGGCGACTTCTCGCCGTCGTTCGAGGACGGCTAC
GAGGTCCAGTCGATTCTCGACGCCATCGAGCGCTCCGACGCGGCCGGCGAGTGGGTCAGCCTCGGCTGA

>Haloferax_alexandrinus-01369
ATGTACATCGGAGTGCTCACCGTCCCGCTCGGAGACGAACCCCTCGACGACGCGCTCGACTATCTGTCGG
GCATCGGCGTCGACGGCGTCGAACTCGCCGTCGGCGGCTGGCCCGGCGAGGACCACGTCGACCGGAGCGC
CGTCCTCGCGGACGACGACGCGCAGGCCGACCTCCTCGATTCGGTCGAAAGTCGGGACCTGCAAATCAGC
GCGCTCGCGACGCACAACAACCCGCTGCATCCCGTCGAGGAGACGGCCGCCGAGGCCGACACCGAACTCC
GCGAGGCAATCGAACTCGCGGACGCCCTCGACGCGAACACCGTCACCTGTTTCTCGGGACTCCCCGCCGG
CGGCCCGAACGACGAGGTGCCGAACTGGATTACCGCGCCGTGGCCGACCGAGCACGCCGACGCCCACGAC
TACCAGTGGGAGGTCGCCGTCGACTACTGGTCCGACCTCGCCGCGTTCGCGGACGACCACGGCGTCGACA
TCGCCATCGAGATGCACCCGAACATGCTCGTCTACGAGCCGACGGGGATGCTGAAGCTCCGCGAGGCGAC
CAACGAGCGCATCGGCGCGAACTTCGACCCCTCGCACCTCTACTGGCAGGACATCTCCATCACCGACGCG
ATTCGGTTCCTCGGCGAGGCGGACGCCATCCACCACTTCCACGCGAAGGACACGAAGGTGTACGAGTCCG
AGTCGCGCATCAAGGGCGTCCTCGACACGACCTCCTACGCGGACACCGCCGACCGCTCGTGGCTGTTCCG
GTCTATCGGCTACGGTCACGACGAGGGCCACTGGAAGGACGTGGTGTCGACGCTCCGGATGGTCGGCTAC
GAGGGCGCGCTCTCCATCGAACACGAGGACGCGCTCACGTCGTCCACGGAGGGACTCGAAAAGGCCGTCG
ACGTGCTCTCGCGCGCCGTCTTCGAAACGCAACCCGGCGACGCCTACTGGGCGGAGTAA

>Haloferax_lucentense-02660
ATGTACATCGGAGTGCTCACCGTCCCGCTCGGAGACGAACCCCTCGACGACGCGCTCGACTATCTGTCGG
GCATCGGCGTCGACGGCGTCGAACTCGCCGTCGGCGGCTGGCCCGGCGAGGACCACGTCGACCGGAGCGC
CGTCCTCGCGGACGACGACGCGCAGGCCGACCTCCTCGATTCGGTCGAAAGTCGGGACCTGCAAATCAGC
GCGCTCGCGACGCACAACAACCCGCTGCATCCCGTCGAGGAGACGGCCGCCGAGGCCGACACCGAACTCC
GCGAGGCAATCGAACTCGCGGACGCCCTCGACGCGAACACCGTCACCTGTTTCTCGGGACTCCCCGCCGG
CGGCCCGAACGACGAGGTGCCGAACTGGATTACCGCGCCGTGGCCGACCGAGCACGCCGACGCCCACGAC
TACCAGTGGGAGGTCGCCGTCGACTACTGGTCCGACCTCGCCGCGTTCGCGGACGACCACGGCGTCGACA
TCGCCATCGAGATGCACCCGAACATGCTCGTCTACGAGCCGACGGGGATGCTGAAGCTCCGCGAGGCGAC
CAACGAGCGCATCGGCGCGAACTTCGACCCCTCGCACCTCTACTGGCAGGACATCTCCATCACCGACGCG
ATTCGGTTCCTCGGCGAGGCGGACGCCATCCACCACTTCCACGCGAAGGACACGAAGGTGTACGAGTCCG
AGTCGCGCATCAAGGGCGTCCTCGACACGACCTCCTACGCGGACACCGCCGACCGCTCGTGGCTGTTCCG
GTCTATCGGCTACGGTCACGACGAGGGCCACTGGAAGGACGTGGTGTCGACGCTCCGGATGGTCGGCTAC
GAGGGCGCGCTCTCCATCGAACACGAGGACGCGCTCACGTCGTCCACGGAGGGACTCGAAAAGGCCGTCG
ACGTGCTCTCGCGCGCCGTCTTCGAAACGCAACCCGGCGACGCCTACTGGGCGGAGTAA

>Haloferax_lucentense-02661
ATGACTGACCCACTCTCTATCGGCGTCCTCGGCTACCGATTCATGGGGAAGGCGCACTCCAACGCGCTCG
CCCGCCTGCCGATGTTCTTCCCCGACGCGCCCGACGTGGAGCGCTCCGTCATCGTCGGCCGCGACGAGGA
GGCGCTTTCCGACGCGGCGGAGCGCTTCGGCTTCGAATCGACCGCGACCGACTGGCGCGACGTGGTCGAC
GACGTGGACGTGTTCTACAACCTCGGCCCGAACCACCTCCACGCCGAACCCTCCATCGCCGCGCTCGAAG
CCGGTGCCAGCGTCTTCTGCGAGAAGCCGCTCGCGCCGACGCTCGACGAGGCCGAGGCGATGCGCGACGC
CGCCCGCGCGGCCGACGGCGTCGCCGGCTGTGCGTTCAACTACCGCTTCGTGCCCGCCATCCGGTACGCC
AAGCGACTCATCGAGAGCGGCGAACTCGGCGAGATTCGACACGTTCGCGGGCGCTACTTGCAGGATTGGC
TCGTCGACGCCGACGCGCCGTGGACGTGGCGCATGGACGAAGACGCCGCCGGCTCCGGCGCGCTCGGTGA
CCTCGGCGCGCACACCATCGACCTCGTTCGGTTCCTCGTCGGTGACCGCGCCGGCGACATCGACCGCATC
TCGGGGCATCTCCAGACGTTCGTCGACGAGCGGCCCGTCCCCGGCGAGGACGAGTACCGGCCCGTGACCG
TCGACGACGCCTACACCGCGCAGGCCGAGTTCGAAAACGGCGCGGTCGGGAGCTTCGAGGCCTCGCGCTT
CGCAGACGGCCACAAGAACGACCACACCATCGAGATTCACGGCTCCGAGGGCAGCCTTCAGTTCTCGCTC
GAACGCCTCAACGAACTGGAGGTGAAAACCGGCGACGCCCGCGGCTACGAGACGGTGCTCGTCACCGACG
AGGACGACCCCTACCTCGACCACTGGTGGCCGCCGGGCCACGTCCTCGGCTGGGAACACACGTTCGTCCA
CGAGAACTACGAGTTCCTGTCGGCGGTCGCCGGCGGCGGCGACTTCTCGCCGTCGTTCGAGGACGGCTAC
GAGGTCCAGTCGATTCTCGACGCCATCGAGCGCTCCGACGCGGCCGGCGAGTGGGTCAGCCTCGGCTGA

>Halorubrum_saccharovorum-03203
ATGACAGTCACTGTCGGGATGCTCGGCTACCGGTTCATGGGAAAGGCTCACTCGAACGCGTTCGCCCGGC
TTCCCATGTTCTTCCCGGAGGCACCGGAGATCGAGCGAGACATCCTCGTCGGCCGCGACGAAGAGGCGCT
CGCAGACGCCGCTGACCGGCTCGGATTCTCTCGGACGACGACCGATTGGCAGGAAGCCATCGACGCGGTC
GACGTCTTCTACAATGTGGGACCGAATCACGTTCACGCCGAGCCGGCTATCGCCGCGCTCGAGGCAGGCG
TCCCCGTTCTCTGTGAGAAACCGCTCGCAGCGACGACCGACGATGCCGAACGGATGGCGGCGGCGGCCGA
CGATGCAGACGTCCCCACCGCGATCGCGTTTAACTATCGGTACGTGCCGGCTATCAGGTACGCGAAGGAA
CTCATCGACGACGGGGTCCTCGGCGAGATCCACCACGTCCGGGCGACCTATCTCCAAGATTGGCTCGTCG
ATCCGCAGGCGCCGTGGTCGTGGCGGAACAGCGAGGAACTGGCCGGTAGCGGTGCACTCGGTGACCTAGG
TGCGCACTCGATCGACCTCGCGCAGTTCCTGCTCGGTGACCGGATCGAACGCGTCAGCGGCCACCTCCAC
ACTTTCGTCGACGAGCGGCCGGTGCCAGGCGAGGGCGGCGGTGGTCTCGACGCAGAGAGCCAGGAGAGCG
TCGAGACCCGCGAGGTCACCGTCGACGACGCTTACTCCGCTCAAGCGGTCTTCGAAGGAGGCGCGATGGG
AACCTTCGAGGCGTCCCGCTTCGCCAACGGGCGAAAGAACGCCCACACGATCGAAGTGAACGGCTCGGAG
GGGAGCCTGAGATTCGACCTCGAACGGCTCAACGAACTGGAGGTGCTCCGCGGAGACGACCGCGGCTTCG
AGACGGTTCTCGTGACCGATCCCGACGATCCCTACATCGACCACTGGTGGCCGCCGGGCCATACCATCGG
CTGGGAACACACGTTCGTTCACGAGGACTACGAATTCCTCACGGCCGTCGCCGAGGGGTCCGAGTACCAC
CCGAATTTCCAGGACGGCCTGGCCGTTCAGCGCGTCCTCGACGCCATTAGCCGGAGCGATGAGACGGATC
GCTGGACCGAGATCTGA

>Halorubrum_saccharovorum-03204
ATGGATGTAGGAGTCCTTACAGTGGCACTGGGTGAAGAGCCGTTAGATCAGACGCTGGAATACCTCTCCG
AAATCGGAGTCGGTGCGGTTGAGTTCGGCTGCGGCGGGTTCGTCGGTGATAGTCACCTCGCGCGCGAAGA
GTACCTCGACGACGAAGCGGCACAGCAAGAGCTGCTCGAGCTGGTCGCCGAACACGACCTAGAGATTAGC
GCGCTGTCGACGCACAACAACCCGCTGCATCCGGACGACGACCGCGCCGACCGAGCGGTAACGGAGATCC
AAGAGGCAGTCCGCCTCGCCGACCAGTTGGGGGTGGAAAACGTCAACACCTTCTCCGGGCTCCCGGGAGG
CGGGCCGAACGACGAGGTCCCGAACTGGGTTACGGCGCCGTGGCCGCCGGAACACGCCGAGGCGCTCGAC
TACCAGTGGGAGGAGGTCGCCGTGCCGACGTGGACCGCTCTGGCGGAGCACGCCGACGACCACGGGGTGA
ACATCTGTATCGAGATGCACCCGAACATGCTCGTGTACGAGCCCACCGGGTTGATGCGGCTCCGAGAGGC
GACGAACGAGCGGATCGGCGCCAACTTCGATCCCTCGCACCTCTACTGGCAGGGGATCGACGTGACCGAG
GCGATCCGCTTCCTGGGCGAGCGCGACGCGATTCACCACTTCCACGCGAAGGACACGAAGGTGTACGACG
CGAACGCGCGCGTGAAGGGAGTTCTCGACACCGAGCCGTACACCGCTGAGGCCGACCGCTCGTGGCTGTT
CCGCTCGATCGGCTACGGCCACGGCGAGTCCCACTGGAAGGACATCGTCTCGACGCTCCGGATGGTCGGC
TACGAGGGCGCGCTGTCGATCGAGCACGAGGACTCGCTCACGTCGAGCCGCGAAGGACTGGAGCGGGCCG
TCGATGTGCTCCAGCGAGCGGTCTTCGAGACGCAGCCGGGAGACGCCTACTGGGCCTGA

>Haloferax_volcanii-00001
ATGACTGACAAACTTTCCGTCGGCGTCCTCGGCTACCGCTTCATGGGCAAGGCGCACTCCAATGCGCTCG
CCCGCCTGCCGATGTTCTTCCCCGACGCGCCCGACGTGGAGCGCTCAGTCATCGTCGGCCGCGACGAGGA
GGCGCTTTCCGACGCGGCGGAGCGCTTCGGCTTCGAATCGACCGCGACCGACTGGCGCGACGTGGTCGAC
GACGTGGACGTGTTCTACAACCTCGGCCCGAACCACCTCCACGCCGAACCCTCCATCGCCGCGCTCGAAG
CCGGTGCCAGCGTCTTCTGCGAGAAGCCGCTCGCGCCGACGCTCGACGAGGCCGAGGCGATGCGCGACGC
CGCCCGCGCGGCCGACGGCGTCGCCGGCTGTGCGTTCAACTACCGCTTCGTGCCCGCCATCCGGTACGCC
AAGCGACTCATCGAGAGCGGCGAACTCGGCGAGATTCGACACGTTCGCGGGCGCTACTTGCAGGATTGGC
TCGTCGACGCCGACGCGCCGTGGACGTGGCGCATGGACGAAGACGCCGCCGGCTCCGGCGCGCTCGGTGA
CCTCGGCGCGCACACCATCGACCTCGTTCGGTTCCTCGTCAGTGACCGCGCCGGCGACATCGACCGCATC
TCGGGGCATCTCCAGACGTTCGTCGACGAGCGGCCCGTCCCCGGCGAGGACGAGTACCGGCCCGTGACCG
TCGACGACGCCTACACCGCGCAGGCCGAGTTCGAAAACGGCGCGGTCGGGAGCTTCGAGGCCTCGCGCTT
CGCAGACGGCCACAAGAACGACCACACCATCGAGATTCACGGCTCCGAGGGCAGCCTTCAGTTCTCGCTC
GAACGCCTCAACGAACTGGAGGTGAAAACCGGCGACGCCCGCGGCTACGAGACGGTGCTCGTCACCGACG
AGGACGACCCCTACCTCGACCACTGGTGGCCGCCGGGCCACGTCCTCGGCTGGGAACACACGTTCGTCCA
CGAGAACTACGAGTTCCTGTCGGCGGTCGCCGGCGGCGGCGACTTCTCGCCGTCGTTCGAGGACGGCTAC
GAGGTCCAGTCGATTCTCGACGCCATCGAGCGCTCCGACGAGGCCGGCGAGTGGGTCAGCCTCGGCTGA

>Haloferax_volcanii-00001
ATGTACATCGGAGTGCTCACCGTCCCGCTCGGAGACGAACCCCTCGACGACGCGCTCGACTACCTGTCCG
GTATCGGCGTCGACGGCGTCGAACTCGCCGTCGGCGGCTGGCCCGGCGAGGACCACGTCGACCGAAGCGC
CGTCCTCGCGGACGACGACGCGCAGGCCGACCTCCTCGACTCGGTCGAGAGCCGAGACCTGCAAATCAGC
GCGCTCGCGACGCACAACAACCCGCTTCACCCCGTCGAGGAGACGGCCGCCGAGGCCGACACCGAACTCC
GCGAGGCCATCGAACTCGCGGACGCCCTCGACGTGAACACCGTCACCTGTTTCTCGGGACTCCCCGCCGG
CGGCCCGAACGACGAGGTACCGAACTGGATTACCGCGCCGTGGCCGACCGAGCACGCCGACGCCCACGAC
TACCAGTGGGAGGTCGCCGTCGACTACTGGTCGGACCTCGCCGCGTTCGCCGACGACCACGGCGTGGACA
TCGCCATCGAGATGCACCCGAACATGCTCGTCTACGAGCCCACGGGCATGCTGAAGCTCCGCGAGGCGAC
GAACGAGCGCATCGGCGCGAACTTCGACCCCTCGCACCTCTACTGGCAGGACATCTCCATCACCGACGCG
ATTCGGTTCCTCGGCGAGGAGGACGCCATCCACCACTTCCACGCGAAGGACACGAAGGTCTACGAGTCCG
AGTCGCGCATCAAGGGCGTCCTCGACACGACCTCCTACGCGGACACCGCCGACCGCTCGTGGCTGTTCCG
CTCTATCGGCTACGGCCACGACGAAGGCCACTGGAAGGACGTGGTCTCGACGCTCCGCATGGTCGGCTAC
GAGGGCGCGCTCTCCATCGAACACGAGGACGCGCTCACGTCGTCCACGGAGGGACTCGAAAAGGCCGTCG
ACGTGCTCTCGCGTGCCGTCTTCGAGACGCAACCCGGCGACGCCTACTGGGCGGAGTAA

>Haloferax_volcanii_DS2_DSM_3757-01283
ATGACTGACAAACTTTCCGTCGGCGTCCTCGGCTACCGCTTCATGGGCAAGGCGCACTCCAATGCGCTCG
CCCGCCTGCCGATGTTCTTCCCCGACGCGCCCGACGTGGAGCGCTCAGTCATCGTCGGCCGCGACGAGGA
GGCGCTTTCCGACGCGGCGGAGCGCTTCGGCTTCGAATCGACCGCGACCGACTGGCGCGACGTGGTCGAC
GACGTGGACGTGTTCTACAACCTCGGCCCGAACCACCTCCACGCCGAACCCTCCATCGCCGCGCTCGAAG
CCGGTGCCAGCGTCTTCTGCGAGAAGCCGCTCGCGCCGACGCTCGACGAGGCCGAGGCGATGCGCGACGC
CGCCCGCGCGGCCGACGGCGTCGCCGGCTGTGCGTTCAACTACCGCTTCGTGCCCGCCATCCGGTACGCC
AAGCGACTCATCGAGAGCGGCGAACTCGGCGAGATTCGACACGTTCGCGGGCGCTACTTGCAGGATTGGC
TCGTCGACGCCGACGCGCCGTGGACGTGGCGCATGGACGAAGACGCCGCCGGCTCCGGCGCGCTCGGTGA
CCTCGGCGCGCACACCATCGACCTCGTTCGGTTCCTCGTCAGTGACCGCGCCGGCGACATCGACCGCATC
TCGGGGCATCTCCAGACGTTCGTCGACGAGCGGCCCGTCCCCGGCGAGGACGAGTACCGGCCCGTGACCG
TCGACGACGCCTACACCGCGCAGGCCGAGTTCGAAAACGGCGCGGTCGGGAGCTTCGAGGCCTCGCGCTT
CGCAGACGGCCACAAGAACGACCACACCATCGAGATTCACGGCTCCGAGGGCAGCCTTCAGTTCTCGCTC
GAACGCCTCAACGAACTGGAGGTGAAAACCGGCGACGCCCGCGGCTACGAGACGGTGCTCGTCACCGACG
AGGACGACCCCTACCTCGACCACTGGTGGCCGCCGGGCCACGTCCTCGGCTGGGAACACACGTTCGTCCA
CGAGAACTACGAGTTCCTGTCGGCGGTCGCCGGCGGCGGCGACTTCTCGCCGTCGTTCGAGGACGGCTAC
GAGGTCCAGTCGATTCTCGACGCCATCGAGCGCTCCGACGAGGCCGGCGAGTGGGTCAGCCTCGGCTGA

>Haloferax_volcanii_DS2_DSM_3757-01284
GTGGTTGATATGTACATCGGAGTGCTCACCGTCCCGCTCGGAGACGAACCCCTCGACGACGCGCTCGACT
ACCTGTCCGGTATCGGCGTCGACGGCGTCGAACTCGCCGTCGGCGGCTGGCCCGGCGAGGACCACGTCGA
CCGAAGCGCCGTCCTCGCGGACGACGACGCGCAGGCCGACCTCCTCGACTCGGTCGAGAGCCGAGACCTG
CAAATCAGCGCGCTCGCGACGCACAACAACCCGCTTCACCCCGTCGAGGAGACGGCCGCCGAGGCCGACA
CCGAACTCCGCGAGGCCATCGAACTCGCGGACGCCCTCGACGTGAACACCGTCACCTGTTTCTCGGGACT
CCCCGCCGGCGGCCCGAACGACGAGGTACCGAACTGGATTACCGCGCCGTGGCCGACCGAGCACGCCGAC
GCCCACGACTACCAGTGGGAGGTCGCCGTCGACTACTGGTCGGACCTCGCCGCGTTCGCCGACGACCACG
GCGTGGACATCGCCATCGAGATGCACCCGAACATGCTCGTCTACGAGCCCACGGGCATGCTGAAGCTCCG
CGAGGCGACGAACGAGCGCATCGGCGCGAACTTCGACCCCTCGCACCTCTACTGGCAGGACATCTCCATC
ACCGACGCGATTCGGTTCCTCGGCGAGGAGGACGCCATCCACCACTTCCACGCGAAGGACACGAAGGTCT
ACGAGTCCGAGTCGCGCATCAAGGGCGTCCTCGACACGACCTCCTACGCGGACACCGCCGACCGCTCGTG
GCTGTTCCGCTCTATCGGCTACGGCCACGACGAAGGCCACTGGAAGGACGTGGTCTCGACGCTCCGCATG
GTCGGCTACGAGGGCGCGCTCTCCATCGAACACGAGGACGCGCTCACGTCGTCCACGGAGGGACTCGAAA
AGGCCGTCGACGTGCTCTCGCGTGCCGTCTTCGAGACGCAACCCGGCGACGCCTACTGGGCGGAGTAA

>Halosimplex_carlsbadense-00207
ATGGACGTAGGTGTGCTGACAGTGGCACTCGGCGGCGAATCGCTCGACGACGCGTTCGCGTACCTGGCCG
ACCAGGGCGTCGACGCCGTCGAACTGGGCTGTGGCGGGTTCGTCGGCGACGACCACCTCCCGCGCGAGGA
GTATCTCGACGACGAGGACGCCCAGGCCGACCTGCAGGCCAGCCTCGATGAGCACGACCTGTACGTCTCG
GCCCTGGCGACGCACAACAACCCGCTCCACCCCGACGACGAGCGGGCGGCTCGAGCCGACACCGAACTCC
GGGAGGCCATCGAGCTGGCCGACCAGCTCGGCGTCGACGCGGTGACCTGCTTCTCCGGCCTCCCGGCGGG
CGGTCCGAACGACGAGACGCCCAACTGGATCACGGCGCCGTGGCCGAACGAGCACCACGAGGCCCACGAG
TACCAGTGGGAGGTCGCCGAGGAGTACTGGTCGGATCTGGCCGAACACGCGAAAGCCCACGACGTGTACG
TCGGCATCGAGATGCACCCGAACATGCTGGTGTACGAACCCACGGGAATGCTCGAACTGCGCGAGCGGAC
CAACGAGTACATCGGCGCGAACTTCGACCCGTCGCACCTGTTCTGGCAGGGCATCGACATCACCGAGGCC
ATCCGCTTCCTCGGCGAGGAAGACGCCATCCATCACTTCCACGCCAAGGACACGAAGGTCTACGAGTCGA
ACTCCCGCGTCAAGGGCGTGCTGGACACCGAGCCCTACACGGAGGAACCGGACCGCTCGTGGCTGTTCAG
GTCGATCGGCTACGGCCACGGCGAGGAGTTCTGGAAGGACGTGGTCTCGACCCTGCGGATGATCGACTAC
GACGGCGCCCTCTCCATCGAGCACGAGGACTCGCTGACCTCCCCGAACGAGGGCCTGGAGAAGGCCATCG
ACGTGCTCCAGCGTTCCGTCTTCGAGACCACCCCCGGCGACGCCTACTGGGCCTGA

>Halosimplex_carlsbadense-00208
ATGACGGAGGAATCACTCTCCGTCGGCGTCCTCGGCTATCGCTTCATGGGCAAAGCCCACGCGAACGCGC
TGGCGCGCCTGCCGATGTTCTTCCCGGAGGCGCCCGCGGTCGAGCGGGAGGTCATCGTCGGGCGCGACGA
GGAGGCGCTCGCGGACGCCGCCGACCAGCTGGGCTTCAACAGGTACGCGACCGACTGGGAAGACGTGGTC
GAGGAGGTGGACGTGTTCTACAACCTCGGACCGAACAACATCCACGCCGACCCCTCGATCGCGGCGCTGG
AGGCCGACACGCACGTCTTCTGCGAGAAGCCGCTCGCGCACACGCTCGACGACGCCGAGCGCATGCGCGA
CGCCGCCCGCGACTCGGCGGCGACCGCGGGCATCGCCTTCAACTACCGGTTCATCCCCGCGATCCGGTAC
GCGAAGAACCTGATCGACGCGGGCGAACTCGGCGATATCCACCACGTCCGCGGGCGGTACCTCCAGGACT
GGCTGGTCGACCCCGAGGCGCCGTGGTCCTGGCGCAACTCGAAGGAACACGCGGGGTCGGGCGCGCTCGG
TGACCTCGGCGCCCACACCATCGACCTGGCGCGTTTCCTCGTCGGCGACCGCGCCGGCGACATCTCGCGG
CTGTCGGGGCATCTCCAGACGTTCGTCGACGAACGGCCGGTCCCCGGCGGCGACGAGGGATCGCTGGAGG
GGGGCGGTGGCGACTCGACGGAGACGCGCGAGGTGACCGTCGACGACGCCTACACCGCACAGGCCGAGTT
CGAGAACGGCGCGATGGCGACCTTCGAGGCGTCGCGGTTCGCCAACGGCCGCAAGAACGACCACACGATC
GCCATCGAGGGGTCGAAAGGCAGCCTCTCGTTCTCGCTCGAACGCCTGAACGAACTCGAACTGCTCACCG
AAGGTGATCGGGGCTTCCAGACGATCAACGTCACCGCCCCCGACGACCCCTACATCGACCACTGGTGGCC
CGAGGGCCACGTCATCGGCTGGGAACACACGTTCGTCCACGAGAACTTCGAGTTCCTCTCGGCGGCCGCC
GCCGGCGAGGCCCACAGCCCTTCCTTCGAGGACGGCTATCGCGTGCAGGAACTGCTCGCCGCGATCGAGG
CGTCCGACGACGCCGGCGAGTGGGTCGACGTCTAA

>Haloferax_elongans-02247
ATGTACATCGGAGTGCTCACTGTCCCGCTCGGGAACGAATCCCTCGACGACGCGCTCGACTACCTGTCGA
GTATCGGCGTCGAAGGTGTCGAACTCGGTGTCGGTGGCTGGCCCGGCGAAGACCACGTCGACCGCACAGC
AGTCCTCGGTGACGAAGACGCGCAGGCCGACCTGCTCGCGGCCGTCGAAGACCGAGACATGCAGATTAGC
GCGCTGGCGACCCACAACAACCCGCTTCACCCGGACGAAGAGACGGCGGCCGAAGCGGACACGGAACTCC
GCGAGGCTATCGAACTCGCCGACGCGCTCGACGTGAACACCGTCACCTGTTTCTCCGGCCTGCCCGCGGG
CGGCCCGAACGACGAAGTCCCGAACTGGATTACGGCCCCGTGGCCGACCGAGCACGCCGACGCCCACGAG
TACCAGTGGGACGTCGCCGTCGACTACTGGTCCGACCTCGCCGAGTTCGCAGACGACCACGGCGTCGACA
TGGCTATCGAGATGCACCCCAACATGCTCGTCTACGAACCGACGGGGATGCTGAAGCTCCGCGAGGCGAC
AAACGAGCGCATCGGCGCGAACTTCGACCCCTCGCACCTCTACTGGCAGGACATCTCGATTACCGACGCG
ATTCGCTTCCTCGGCGAACACGACGCCATTCACCACTTCCACGCGAAGGACACGAAGGTCTACGAGTCCG
AATCGCGCGTCAAGGGCGTCCTCGACACCACCTCCTACGCCGACACCGCCGACCGCTCGTGGCTCTTCCG
GTCTATCGGCTACGGCCACGGCGAAGAACACTGGAAAGACGTCGTTTCGACGCTCCGGATGGTCGGCTAC
GAGGGCGCGCTCTCTATCGAGCACGAAGACGCACTCACATCCTCGAACGAAGGCCTCGAAAAGGCCGTGG
ACGTCCTCGACCGCGCCGTCTTCGAGACGCAACCCGGCGACGCCTACTGGGCGGAGTGA

>Haloferax_elongans-02248
ATGACTGAACCCCTCACAGTCGGTGTCCTCGGTTACCGATTCATGGGCAAAGCGCACTCCAACGCGCTCG
CCCGCCTCCCGATGTTCTTCCCCGACGCGCCGGACGTCGAGCGCTCGGTCATCATCGGCCGCGACGAAGA
GGCCCTCGCCGATGCCGCCGAGCGATTCGGCTTCGAATCGACGGCGACCGACTGGCGCGACGTCGTCGAC
GACGTGGACGTGTTCTACAATCTCGGGCCGAACCACCTCCACGCCGAACCCTCGATTGCGGCGCTCGAAG
CAGGCGCACACGTCTTCTGCGAGAAACCGCTCGCGCCGACGCTGGACGAAGCCGAAGCGATGCGCGACGC
CGCCCGCGACGCCGCCCGCGACGCCGACGGCGTGGCCGGGTGCGCGTTCAACTACCGCTTCGTCCCGGCT
ATCCAGTACGCGAAAGGCCTCATCGAAGACGGCGAACTCGGTGAGATTCACCACGTCCGCGGCCGCTACC
TCCAAGACTGGCTCGTCGACCCCGAGGCACCGTGGGCGTGGCGCATGGAGAAGGAGTACGCTGGGTCCGG
CGCGCTCGGCGACCTCGGCGCGCACACGGTCGACCTCGCGCGCTTCCTCGTCGGCGAGGTTGCGGGCGAC
ATCGAGCGCGTCTCCGGGCACCTCCAGACGTTCGTGGACGAGCGTCCGGTTCCCGGCACGGACGAGTACA
AGCCCGTCACGGTCGACGACGCGTACACCGCACAGGCCGAGTTCGAAAACGGCGCGGTCGGGTCGTTCGA
GGCTTCGCGCTTCGCCAACGGCCACAAGAACGACCACACCATCGAGATTCAGGGCTCGGACGGGAGTCTG
AAGTTCTCGCTCGAACGCCTCAACGAACTGGAGGTCATGACGGGCGATTCGCGCGGCTACGAAACGGTTC
TCGTCACCGACGAAACAGACCCGTACGTGGACCACTGGTGGCCGCCAGGCCACGTCATTGGCTGGGAGCA
CACCTTCGTCCACGAGAACTACGAGTTCCTGTCGGCGGCCGCCGAGGGAAGTGAGTTCTCCCCGTCGTTC
GAGGAGGCCTACGAAGTACAGGAGATTCTCGACGCAATCGAGCGCTCCGACGACAGCGGCGAGTGGGTCA
GTCTGGACTAA

>Haloferax_larsenii-01461
ATGTCTGAACCCCTCACAGTCGGCGTCTTAGGCTACCGCTTTATGGGCAAAGCGCACTCCAACGCGCTCG
CTCGCCTCCCGATGTTCTTCCCCGACGCGCCGGACGTCGAGCGCTCGGTCATCATCGGCCGCGACGAGGA
GGCGCTCGCCGACGCCGCCGACCGATTCGGCTTCGAATCGACGGCGACCGACTGGCGCGACGTCGTCGAC
GACGTGGACGTGTTCTACAACCTCGGGCCGAACCACCTCCACGCCGAACCCTCGATTGCGGCGCTCGAAG
CAGGGGCGCACGTCTTCTGCGAGAAACCCCTCGCGCCGACGCTGGATGAAGCCGAAGCGATGCGCGACGC
CGCCCGCGACACCGACGGCGTGGCCGGGTGCGCGTTCAACTACCGTTTCGTCCCGGCCATCCAGTACGCG
AAAGACCTCATCGAAGACGGTGAACTCGGTGAGATTCACCACGTCCGCGGCCGCTACCTGCAAGACTGGC
TGGTCGACCCCGAGGCACCGTGGGCGTGGCGCATGGAGAAGGAGTACGCCGGGTCCGGGGCGCTCGGCGA
CCTCGGCGCGCACACCGTGGACCTCGTGCGCTTCCTCGTCGGCGAGGTTGCGGGCGATATCGAACGCGTC
TCTGGACACCTCCAGACGTTCGTCGACGAGCGCCCGGTTCCGGGCACGGACGAGTACAAGCCCGTCACCG
TCGACGACGCCTACACCGCGCAGGCCGAGTTCGAAAACGGCGCGGTCGGGTCGTTCGAGGCCTCGCGCTT
CGCCAACGGCCACAAGAACGACCACACCATCGAGATTCAGGGCTCGGACGGGAGTCTGAAGTTCTCGCTC
GAACGCCTCAACGAACTGGAGGTCATGACGGGTGATTCGCGCGGCTACGAAACCGTGCTCGTCACCGACG
AAACCGACCCCTACGTGGACCACTGGTGGCCGCCGGGCCACGTCATCGGCTGGGAGCACACTTTCGTCCA
CGAGAACTACGAGTTCCTGTCGGCGGCCGCCGAGGGAAGTGAGTTCTCTCCCTCGTTCGAGGAAGCCTAC
GAAGTACAGGAGATTCTCGACGCAATCGAGCGCTCCGACGACAGCGGCGAGTGGGTCAGTCTGGACTAG

>Haloferax_larsenii-01462
ATGTACATCGGAGTGCTCACTGTCCCGCTCGGGAACGAATCCCTCGACGACGCGCTCGACTACCTGTCGA
GTATCGGCGTCGAAGGTGTCGAACTCGGTGTCGGTGGCTGGCCCGGCGAAGACCACGTCGACCGCACAGC
AGTCCTCGGCGACGAAGACGCACAGGCCGACCTGCTCGCGGCCGTCGAAGGCCGAGACATGCAGATTAGC
GCGCTGGCGACCCACAACAACCCGCTTCACCCGGACGAGGAGACGGCGGCCGAGGCGGACACGGAACTCC
GCGAGGCTATCGAACTCGCCGACGCGCTCGACGTGAACACCGTCACCTGTTTCTCCGGCCTGCCCGCGGG
CGGCCCGAACGACGAAGTCCCGAACTGGATTACGGCCCCGTGGCCGACCGAGCACGCCGACGCCCACGAG
TACCAGTGGGACGTCGCCATCGACTACTGGTCCGACCTCGCCGAATACGCCGACGACCACGGCGTCGACA
TGGCAATCGAGATGCACCCCAACATGCTCGTTTACGAGCCGACGGGGATGCTGAAACTCCGCGAGGCGAC
AAACGAGCGCATCGGCGCGAACTTCGACCCCTCGCACCTCTACTGGCAGGATATCTCCATCACCGACGCG
ATTCGATTCCTCGGCGAACACGACGCCATCCACCACTTCCACGCGAAGGACACGAAGGTGTACGAGTCCG
AATCGCGCGTCAAGGGCGTCCTCGATACCACTTCCTACGCCGACACCGCCGACCGCTCGTGGCTCTTCCG
GTCTATCGGCTACGGCCACGGCGAAGAACACTGGAAAGACGTCGTCTCGACGCTCCGGATGGTCGGCTAC
GAGGGTGCGCTCTCTATCGAACACGAAGACGCGCTCACGTCCTCGAACGAGGGGCTGGAAAAGGCCGTCG
ACGTGCTCGACCGCGCCGTCTTCGAGACGCAACCCGGCGATGCCTACTGGGCGGAGTGA

>Haloferax_mucosum-02212
ATGAGTGACTCTAATTCATCATCTGAACCCCTCAAAGTCGGTGTCCTCGGCTACCGCTTCATGGGCAAAG
CCCACTCCAACGCCCTCGCGCGCCTCCCGATGTTCTTCCCCGACGCGCCCGACGTCGAGCGCTCCGTTAT
CGTCGGCCGCGACGAGGAGGCCCTCGCCGACGCCGCCGACCGATTCGGCTTCGAATCGACGGCGACCGAT
TGGCGCGACGTCGTGGACGACGTTGACGTGTTCTACAACCTCGGACCGAACCACCTCCACGCGGAACCCT
CGATTGCGGCCCTCGAAGCCGGCGCACACGTCTTTTGCGAGAAACCGCTCGCGCCGACGCTCGACGAGGC
AGAAGCGATGCGCGACGCCGCCCGCGACGCCGACGGCGTGGCCGGGTGTGCGTTCAACTACCGCTTCGTC
CCGGCGATTCAGTACGCGAAAGGCCTCATCGAAGACGGCGAACTTGGGGAGATTCGACACGTTCGCGGGC
GCTATCTTCAAGACTGGCTCGTTGACCCCGAAGCGCCGTGGGCGTGGCGCATGGACAAAGACCTCGCCGG
GTCCGGCGCGCTCGGCGATCTCGGCGCACACACCATCGACCTCGCGCGCTTCCTCGTCGCCGACGTCGCG
GGCGACATCGAACGCGTGTCCGGCCACCTCCAGACCTTCGTAGACGAACGACCGGTCCCCGGAACGGACG
AGTACAAACCCGTCACCGTCGATGACGCCTACACTGCGCAGGCCGCGTTCGAAAACGGCGCGGTCGGCTC
GTTCGAGGCGTCCCGGTTCGCCGACGGCCACAAAAACGACCACACCATCGAGATTCACGGCTCCGATGGG
AGTCTGACGTTCTCGCTCGAACGCCTCAACGAACTCAGGGTGAAGACGGGCGACGCCCGCGGCTACGAAA
CCGTGCTCGTCACCGACGAATCGGACCCCTACGTGAGAAACTGGTGGCCGCCGGGCCACGTCATCGGCTG
GGAACACACCTTCGTCCACGAGAACTACGAGTTCCTCTCGGCGGTCGCAGACGGTAGCGAGTTCCACCCG
TCGTTCGAGGACGCCTACGAAGTACAGAAGGTTCTTGACGCCATCGAGCGGTCGGACGACAGCGGCGAGT
GGGTCAGTCTCGAATAA

>Haloferax_mucosum-02213
ATGTACATCGGAGTGCTCACTGTCCCGCTCGGAAACGAATCTCTCGACGGTGCGCTCGACTATCTGTCGG
GTATCGGCGTCGAGGGCGTCGAACTCGGCGTCGGCGGCTGGCCCGGCGAAGACCACGTTTCGCGGACGGC
CGTCCTCGACGACGAGGACAAACAGGCCGACCTCCTCGCCGCCGTCGAGCGCCGCGAGATGCAGATTAGC
GCGTTAGCGACGCACAACAACCCGCTCCACCCTGACGAGGAGACAGCGGCCGACGCGGACACGGAACTCC
GAGAGGCAATCGAACTCGCCGACGCGCTCGGCGTGGACACGGTTACGTGTTTCTCCGGTCTCCCCGCGGG
CGGTCCGAACGACGAGGTTCCGAACTGGATTACGGCACCGTGGCCGACAGAGCACGCCGACGCCCACGAG
TACCAGTGGGACGTTGCCATCGACTACTGGTCCGACCTCGCCGCCTTCGCCGACGACCACGGCGTCGATA
TGGCCATCGAGATGCACCCGAACATGCTCGTCTACGAACCCACGGGCATGTTGAAACTCCGGGAGGCGAC
AAACGAGCGCATCGGCGCGAACTTCGACCCTTCGCACCTCTACTGGCAGGATATCGACGTCACCGAGGCG
ATTCGTTTCCTCGGCGACCACGACGCCATCCACCACTTCCACGCGAAGGACACGAAGGTCTACGACCACC
ACTCGAAGGTCAAAGGCGTTCTCGACACCACCTCCTACGCCGATACGGCCGACCGCTCGTGGCTCTTCCG
TTCTATCGGCTACGGCCACGACGAAGGCCACTGGAAGGACGTCGTCTCCACTCTGCGCATGGTCGGCTAC
GAGGGCGTGCTCTCTATCGAACACGAGGACGCGCTCACGTCCTCGAACGAGGGATTAGAAAAGGCCGTGG
ACGTGCTCGACCGGGCCGTCTTCGAGACGCAACCCGGCGACGCCTACTGGGCGGAGTGA

>Halorubrum_arcis-02582
GTGAGGCGGCGACCGCGAAAATTCACGACAATGACCGACGAACCACTGAAGATCGGCGTTCTAGGGTATC
GATTCATGGGCAAGGCGCACGCGAACGCGATGGCGCGGCTCCCGATGTTCTTCCCGGACGCGCCCGAGAT
CGAGCGCCACACGCTCGTCGGGCGCGACGAGGCGGCGCTCGCGGACGCGGCCGAGCGGTTCGGCTTCTCG
CACACCGCGACCGACTGGGAGGCCGCGCTCGACGAGGTGGACGTCTTCTACAACCTCGGGCCGAACCATG
TCCACGCGGAGCCGTCGATCGCGGCCCTCGAAGCGGGGGTCCCCGTCCTCTGCGAGAAGCCGCTCGCGCC
GACGATGGCGGAGGCGGCGGCGATGCGCGACGCGGCGGCCGCGACGGGCGTCACGGCCGGGGCCGCGTTC
AACTACCGCTTCGTCCCCGCGATCCGCTACGCGAAGGGGCTGATAGAGGACGGGGAGCTCGGCGATATCC
GGCAGGTCCGCGGGCGGTACCTCCAGGACTGGCTCGTCGACCCTGAGGCGCCGTGGGCGTGGCGGATGGA
CGCCGAGATGGCCGGATCGGGCGCGCTCGGCGACCTCGGCGCGCACACGATCGACCTCGCGAACTTCCTC
GTCGGCGACGCTGTCGGCGGGATCGACCGCGTCTCGGGACAGCTAACGACGTTCGTCGACGAGCGGCCCG
TCTACGACGACGAGGGGGAGATAGAGGAGTACCGCGACGTGACGGTCGACGACGCGTACGACGCGCAGGT
CGCCTACGAGTCGGGCGCGACCGGGAGCTTCGAGGCGAGCCGCGTCGCCGAGGGGCACAAGAACGACCAC
ACGATCGCGGTCCACGGATCGAAGGGAAGCTTGAGGTTCTCCCTGGAGCGGCTGAACGAACTGGAGGTGC
TCCGCGAGGGAAACCGCGGCTACGAGACGGTGCTGGTGACCGAGGAGTCGGACCCGTACGTCGACCGCTG
GTGGCCCCCCGGGCACGTGATCGGGTGGGAGCACACGTTCGTGCACGAGAACTACGAGTTCCTCTCGGCG
GTCGCCGAGGGCCGGTCGTTCGAGCCGTCGTTCGAAGAGGGGTACGAGGTCCAGCGCGCGCTCGCGGCGG
TCGAGCGCGCCGACGAGCGCGGGGAGTGGGTCGCGGTCGAGTAG

>Halorubrum_arcis-02583
ATGGACATCGGCGTGCTAACGGTTCCCTTGGGCGACGAACCGCTCGACGACGCTGCCGCGTACCTCGACG
GGATCGGCGTCGACGCCGTCGAACTCGGCGTCGGCGGCTGGCCCGGCGAGGACCACGTCGACCGCGAGGC
GCTCCTGGACGACGCGGCGGCCCGCGAGGACCTCCGGGCGCTGCTCGACGACCACGACCTCCGGCTCTCC
GCGCTGGCGACGCACAACAACCCGCTCCATCCCGACGAAGAGCGGGCCGCGGCGGCCGACCGCGAACTGC
GCGAGGCGATCGAGCTGGCGGACCAGCTGGGCGTCGACGCGGTGACCTGCTTCTCCGGGCTCCCCGCCGG
GGCGCCCGGCGACTCGACGCCGAACTGGGTCACGGCGCCGTGGCCGACGGAACACGCCGACGCGCTCGAC
TACCAGTGGGACGAGGTCGCGATCCCCTACTGGCGCGACCTGGCGCAGCACGCCGAGCATCACGGCGTCG
ACGTGGCGATCGAGATGCACCCGAACATGCTGGCCTACGAGCCGACCGGGCTGCTCGCGCTCCGGGAGGC
GACGAACGACCGGATCGGGGCCAACTTCGACCCCTCGCACCTCTACTGGCAGGGGATCGACGTGACGGAG
GCGATCCGCTTCCTCGGCGAGCGCGACGCGATCCACCACGTCCACGCGAAGGACACCAAAGTGTACGACG
CGAAGGCCCGGGTGAAGGGCGTCCTCGACACGACCGGCTACGCCGAGGAGGCCGACCGCTCGTGGCTGTT
CCGCTCGATCGGCTACGGCCACGGCGAGGAACACTGGAAGGACGTCGTCTCGACGCTCCGGATGGTCGGC
TACGAGGGCGCGCTGTCGATCGAACACGAGGACTCGCTCACGTCGTCCCGGGAGGGGTTAGAGAAGGCCG
TCGACGTGTTGGACCGAGCAGTCTTCGAGACGGAGCCGGGAGACGCCTACTGGGCGGAGTGA

>Halorubrum_aidingense-00323
GTGCGCCGGCGGCGACGGGTGAGATCCCCCGCGAGCCGAATCCCCCGAATATTTATTCGGGTTGTTGTAA
TACGTTCGATCATGGACATCGGCGTGTTAACCGTCCCCTTAGGCGGCGAATCGATCGACGATGCGGTCGC
GTACCTCGAGGAAATCGGCGTCGACGCCGTCGAGCTCGGCGTCGGCGGCTGGCCCGGCGAGGACCACGTC
GACCGCGAGGCGACGCTCGACGACGCGGACGCGCAGGCGGCGCTGCTCGACTTGCTCGACGGGCACGACC
TCCGGATCTCCGCGCTCGCGACCCACAACAACCCCCTGCATCCCGACGAGGAGCGGGCCGCGGAAGCCGA
CCGAGAGCTTCGCGAGGCGATCGAGCTGGCCGATCAGCTCGACGTGGGAACGGTCACCTGTTTCTCGGGG
CTGCCCGCGGGGGCGCCCGGCGACTCGACGCCCAACTGGATCACGGCGCCGTGGCCGAGCGAGCACGCCG
ACGCCCACGCCTACCAGTGGGACGAGGTCGCGATCCCGTACTGGCGCGACCTGGCCGCTCACGCCGAGGA
CCACGGCGTCGACGTCGCCATCGAGATGCACCCGAACATGCTCGTCTACGAGCCCACCGGCATGCTCGCG
CTGCGGGAGGCGACCAACGAGCGGATCGGCGCCAACTTCGACCCCTCGCACCTCTACTGGCAGGGGATCG
ACGTGACGGAGGCGATCCGCTTTTTGGGCGCACACGACGCGATCCACCACGTCCACGCCAAGGACACGAA
AGTGTACGACGCGAACGCGCGCGTGAAGGGCGTGCTCGACACGACCGGCTACACCGAGGAGGCCGACCGC
TCGTGGCTGTTCCGGTCGATCGGCTACGGCCACGACGAGGCTCACTGGAAGGACGTCGTCTCGACGCTCC
GGATGGTCGGCTACGAGGGCGCGCTCTCCATCGAACACGAGGACTCGCTCACCTCCTCGCGGGAGGGACT
GGAGAAGGCGGTCGACGTGCTCGACCGCGCGGTCTTCGAGACGCGACCGGGCGACGCGTACTGGGCGGAG
TAA

>Halorubrum_aidingense-00324
ATGACACAGCAACCACTCAAAATCGGCGTGCTGGGGTATCGGTTCATGGGCAAGGCGCACGCAAACGCGC
TCGCGAGACTCCCGATGTTCTTCCCGGACGCGCCCGACATCGAGCGGCACACGCTCGTCGGGCGCGACGA
GGAGGCCTTAGCGGAGGCGGCCGAGCGGTTCGGCTTCGCGCACACGGCGACCGACTGGGAGGACGCGCTC
GAGGAGGTGGACGTCTTCTACAACCTCGGGCCGAACCACGTCCACGCGGAGCCGTCGATCGCCGCCCTCG
AAGCGGGCGTCCCCGTCCTCTGTGAGAAGCCGCTCGCGCCGACGCTGGAGGAGGCGGGAGCGATGCGCGA
CGCCGCGGCCGACGCCGACGTACCGACTGGGACCGCGTTCAACTACCGGTTCGTCCCGGCGATCCGGTAC
GCGAAGGGGCTGATCGAAGACGGCGAGCTCGGCGAGATCCGGCAGGTTCGCGGGCGGTACCTCCAAGACT
GGCTCGTCGACCCCGAGGCGCCGTGGGCGTGGCGAATGGACGCCGACCTCGCGGGGTCCGGCGCGCTCGG
CGACCTCGGCGCGCACACGATCGACCTCGCGGACTTCCTCGTCGGCGACGAGGTCGGCGAGATCGACCGC
GTCTCGGGGCACCTCGAAACGTTCGTCGACGAGCGGCCGGTGTACGACGACGACGGCGCTGTCGACGAAC
ACCGCGACGTGACCGTCGACGACGCCTACACGGCGCAGGTCGCCTACGAGTCCGGCGCGATGGGGAGCTT
CGAGGCGACTCGGTTCGCGACCGGGCACAAGAACGACCACACGATCGAGGTGCACGGCTCGGAGGGGAGC
CTGAAGTTCTCCTTAGAGCGACTCAACGAGTTGGAGGTGCTCAGCGGGGACGCCCGCGGCTACGAGACGG
TGCTCGTCACCGACGAGACGGATCCGTACGTCGACCACTGGTGGCCCCCGGGCCACGTGATCGGCTGGGA
ACACACGTTCGTCCACGAGAACTACGAGTTCCTCACCGCCGTCGCCGAGGGCGGCGAGTTCGAACCCTCG
TTCGCGGACGGCTACGACGTCCAGCGCGTCCTCGACGCCATCGAGGAGTCCGACGAACGCGGAGCGTGGG
TGTCGCTCGACTGA

>Halorubrum_kocurii-01628
ATGACACAGGAACCACTCGAAATCGGCGTGCTTGGGTATCGATTCATGGGCAAGGCGCACGCGAACGCGC
TCGCACGGCTCCCGATGTTCTTCCCGGACGCGCCCGAGATCGAGCGCCACACGCTCGTCGGGCGCGACGA
GGCGGCGCTCGCGGACGCCGCGGAGCGGTTCGGGTTCGCGCACACCGCGACCGACTGGGCGGACGCCCTC
GGCCAGGTGGACGTCTTCTACAACCTCGGACCGAACCACGTCCACGCGGAGCCGTCGATCGCCGCCCTCG
AAGCGGGCGTCCCCGTCCTCTGTGAGAAGCCGCTCGCGCCGACCCTCGACGAGGCCGAAGCGATGCGCGA
CGCGGCGGCCGCCGCAGACGTACCGGCGGGCACCGCGTTCAACTACCGGTTCGTCCCCGCGATCCGGTAC
GCGAAGGGGCTCATCGAGGACGGCGAACTCGGCGAGATCCGACAGGTCCGCGGGCGGTACCTCCAGGACT
GGCTCGTCGACCCCGAGGCGCCGTGGGCGTGGCGGATGGACGCCGACATGGCGGGATCCGGGGCGCTCGG
CGACCTCGGCGCGCACACACTCGACCTCGCGGACTTCCTCGTCGGCGACGCGGTCGGCGGGGTCGACCGC
GTGTCCGGTCACTTACAGACGTTCGTCGACGAGCGGCCCGTCTACGACGACGAGGGCGGCGTCGCGGAGC
ACCGGGACGTGACCGTCGACGACGCCTACACCGCGCAGGTCGCCTACGAGTCGGGCGCGATGGGGAGCTT
CGAGGCGACGCGGTTCGCGGAGGGCCACAAGAACGACCACGCGATCGAGGTGCACGGCTCGAAGGGGAGC
CTGAGGTTCTCCTTGGAGCGGCTCAACGAGCTGGAGGTGCTCCGCGAGGGCGACCGCGGGTACCAGACGG
TGCTCGTCACCGACGAGACCGACCCGTACGTCGACCACTGGTGGCCGCCGGGCCACGTCATCGGCTGGGA
GCACACCTTCGTCCACGAGAACTACGAGTTCCTCTCCGCGGTCGCCGAGGGCGGCGCGTTCGAGCCGTCG
TTCGAGCAGGGGTACGCGGTGCAGAAGACCCTCGACGCGATCGTCCGCGCCGACGAGCGGAGCGAGTGGG
TCTCGGTCGAGTAG

>Halorubrum_kocurii-01629
ATGGACATTGGTGTACTAACCGTTCCCTTGGGCGGTGAATCGATCGACGACGCGGTCGCGTACCTCGACG
AGATCGGCGTCGACGCGGTCGAGCTCGGCGTCGGCGGGTGGCCCGGCGAGGCGCACGTCGACCGCGAGGC
GACCCTCGGCGACGACGCGGCGCAGGCGGAGCTCGAAGCGCTGCTCGACGAGCACGGGCTCCGGATCTCC
GCGCTCGCGACCCACAACAATCCCCTGCACCCGGACGAGGAGCGGGCCGCGGAGGCCGACCGCGAGCTCC
GCGAGGCGATCGAGCTGGCCGACCAGTTGGACGTCGGCACGGTCACCTGCTTCTCCGGGCTCCCCGGCGG
CGCGCCCGGCGACTCCACGCCGAACTGGATCACGGCGCCGTGGCCGACCGAACACGCCGACGCGCTCGAC
TACCAGTGGGACGAGGTCGCGGTCCCGTACTGGACGGACCTGGCGGACCACGCCGAGGCCCACGGCGTCG
ACGTCGCCATCGAGATGCACCCGAACATGCTCGTGTACGAGCCGACCGGGCTGCTCGCGCTGCGGGAGGC
GACGAACGATCGGATCGGCGCCAACTTCGACCCCTCGCACCTCTACTGGCAGGGGATCGACGTGACGGAG
GCGATCCGCTTTTTGGGCGACCGCGACGCGATCCACCACTTCCACGCGAAGGACACGAAGGTGTACGACG
CGAACGCGCGCGTGAAGGGCGTGCTCGACACGACGGGCTACACCGAGGAGGCCGACCGCTCGTGGCTGTT
CCGCTCGATCGGCTACGGCCACGACGAGGGCCACTGGAAGGACGTGGTCTCGACGCTCCGGATGGTCGGA
TACGAGGGCGCGCTCTCGATCGAACACGAGGACTCGCTCACCTCCTCGCGGGAGGGGTTAGAGAAGGCGG
TCGACGTGCTCGACCGCGCAGTCTTCGAGACGCGACCGGGCGACGCCTACTGGGCGGAGTAA

>Halorubrum_tebenquichense-00974
ATGACACAGGAACCGCTGAAGGTCGGCGTGCTGGGGTATCGATTCATGGGCAGGGCGCACGCGAACGCGC
TCGCGCGGCTCCCGATGTTCTTCCCGGACGCGCCCGAGGTCGAGCGGCACACGCTCGTCGGGCGCGACCG
GGACGCCCTCGCGGGGGCGGCCGACCGGTTCGGCTTCGCGCACACCGCGACCGACTGGGAGGCGGCGATA
GACGAGGTGGACGTCTTCTACAACCTCGGCCCGAACCACGTCCACGCGGAGCCGTCGATCGCGGCCCTCG
AAGCGGGGGTCCCCGTCCTCTGTGAGAAGCCGCTCGCGCCGACACTGGAGGAGGCCGCGGCGATGCGCGA
CGCCGCGGCCGCGACCGGCGCGACCGCCGGTACCGCGTTCAACTACCGGTTCGTCCCCGCGATCCGGTAC
GCGAAGGGACTGATCGAAGACGGCGAACTCGGCGAGATCCGGCAGGTCCGCGGGCGGTACCTTCAGGACT
GGCTCGTCGACCCGGAGGCCCCGTGGGCGTGGCGGATGGACGCCGACATGGCGGGATCCGGCGCGCTCGG
CGACCTCGGCGCGCACACGATCGACCTCGCGAACTTCCTCGTGGGCGAGGAGGTCGGCGGGATCGACCGC
GTCTCCGGGCAGTTGACGACGTTCGTCGACGAGCGGCCGGTGTACGTCGACGGCGACGCGGCGGGCGAAG
CCGACGCCGAGGTCGCCGAGTACCGCGACGTGACGGTCGACGACGCCTACAGCGCGCAGGTCGCCTACGA
CTCGGGCGCGACCGGGACCTTCGAGGCCAGCCGGGTCGCCGAGGGGCACAAGAACGACCACGCGATCGCG
GTCCACGGCTCGGAGGGGAGCGTGAAGTTCTCCTTGGAGCGGCTCAACGAACTGGAGGTGCTCCGCGAGG
GGAACCGCGGCTACGAGACGGTGTTCGTCACCGAGGAGACGGACCCGTACGTCGACCGCTGGTGGCCCCC
CGGCCACGTGATCGGGTGGGAACACACGTTCGTCCACGAGAACTACGAGTTCCTCTCGGCGGTCGCCGAG
GGGAAGTCGTTCGAACCGTCGTTCGCGGACGGCTACGAGGTCCAGCAGGTACTCGCGGCGATCCAGCGGG
CCGACAAACTCGGAGAGTGGGTCGAAATCTAA

>Halorubrum_tebenquichense-00975
ATGGACATCGGCGTCTTGACCGTTCCCCTCGGCGGCGAACGGATCGACGACGCGGCCGCGTACCTCGACG
GGCTCGGCGTCGACGCCGTCGAACTCGGCGTCGGTGGGTGGCCCGGGCAGGACCACGCCGACCGCGAGAC
GCTCCTGGAGGACGAGGGGGCGCGCGAGGATCTCCGCGGAGTGCTCGACGACCGCGGGCTCCGGATCTCC
GCGCTCGCGACGCACAACAACCCGCTTCACCCGGACGAGGAGCGGGCCGCGACCGCGGACCGCGAACTGC
GCGAGGCGATCGAACTGGCCGACCTGCTCGGTGTCGGCACGGTGACGTGCTTTTCAGGGCTTCCCGCGGG
CGCGCCCGGCGATTCGACGCCGAACTGGATCACGGCCCCGTGGCCGACCGAACACGCCGACGCGCTCGAC
TACCAGTGGGACGAGGTCGCGGTCCCGTACTGGTCGGACCTCGCCGAACACGCCGAGGACTGCGGCGTCG
ACGTCGCGATCGAAATGCATCCGAACATGCTGGTGTACGAGCCGACCGGCATGCTCGCGCTGCGCGAGGC
GACGAACGAGCGGATCGGTGCCAACTTCGACCCCTCGCACCTCTACTGGCAGGGGATCGACGTTTGCGAG
GCGATCCGCTTCCTCGGCGAGCACGACGCCATCCACCACGTCCACGCGAAGGACACGAAGGTGTACGAGT
CCAACTCGCGAGTGAAGGGCGTCCTCGACACGACCGGGTACGCCGGCGAGTCGGACCGCTCGTGGCTGTT
CCGCTCGATCGGCTACGGCCACGGGGAAGAGCACTGGAAAGAGGTGATCTCGACGCTCCGGATGGTCGGG
TACGAGGGCGCGCTGTCGATCGAACACGAGGACTCGCTCACCTCCTCGCGCGAGGGGTTGGAGAAGGCGG
TCGACGTGTTGGACCGCGCCGCCTTCGAGACCGAACCGGGCGACGCGTACTGGGCGGAGTGA

>Halorubrum_distributum-02975
ATGGACATCGGCGTGCTAACGGTTCCCTTGGGCGACGAACCGCTCGACGACGCGGCCGCGTACCTCGACG
GGATCGGCGTCGACGCCGTCGAACTCGGCGTCGGCGGCTGGCCCGGCGAGGACCACGTCGACCGCGAGGC
GCTCCTGGACGACGCGGCGGCCCGCGAGGACCTCCGGGCGCTGCTCGACGACCACGACCTCCGGATCTCC
GCGCTGGCGACGCACAACAACCCGCTCCATCCCGACGAGGAGCGGGCCGCGGCGGCCGACCGCGAGCTGC
GCGAGGCGATCGAGCTGGCGGACCAGCTGGGCGTCGACGCGGTGACCTGCTTCTCCGGGCTCCCCGCCGG
GGCGCCCGGCGACTCGACGCCGAACTGGGTCACGGCGCCGTGGCCGACGGAACACGCCGACGCGCTCGAC
TACCAGTGGGACGAGGTCGCGATCCCCTACTGGCGCGACCTGGCGCAGCACGCCGAGCATCACGGCGTCG
ACGTGGCGATCGAGATGCACCCGAACATGCTGGCCTACGAGCCGACCGGGCTGCTCGCGCTCCGGGAGGC
GACGAACGACCGGATCGGGGCCAACTTCGACCCCTCGCACCTCTACTGGCAGGGGATCGACGTGACGGAG
GCGATCCGCTTCCTCGGCGAGCGCGACGCGATCCACCACGTCCACGCGAAGGACACCAAAGTGTACGACG
CGAAGGCCCGCGTGAAGGGCGTCCTCGACACGACCGGCTATGCCGAGGAGGCCGACCGCTCGTGGCTGTT
CCGCTCGATCGGCTACGGCCACGGCGAGGAACACTGGAAGGACGTCGTCTCGACGCTCCGGATGGTCGGC
TACGAGGGCGCGCTGTCGATCGAACACGAGGACTCGCTCACGTCGTCCCGGGAGGGGTTAGAGAAGGCCG
TCGACGTGCTCGACCGCGCGGTGTTCGAGACGGAACCGGGCGACGCCTACTGGGCGGAGTGA

>Halorubrum_distributum-02976
ATGACAATGACCGACGAACCACTGAAGATCGGCGTTCTGGGGTATCGATTCATGGGCAAGGCGCACGCGA
ACGCGATGGCGCGGCTCCCGATGTTCTTCCCGGACGCGCCCGAGATCGAGCGCCACACGCTCGTCGGGCG
CGACGAGGCGGCGCTCGCGGACGCGGCCGAGCGGTTCGGCTTCTCGCACACCGCGACCGACTGGGAGGCC
GCGCTCGACGAGGTGGACGTCTTCTACAACCTCGGGCCGAACCACGTCCACGCGGAGCCGTCGATCGCGG
CCCTCGAAGCGGGGGTCCCCGTCCTCTGCGAGAAGCCGCTCGCGCCGACGATGGCGGAGGCGGCGGCGAT
GCGCGACGCGGCGGCCGCGACGGGCGTCACGGCCGGGGCCGCGTTCAACTACCGCTTCGTCCCCGCGATC
CGCTACGCGAAGGGGCTGATAGAGGACGGGGAACTCGGCGATATCCGGCAGGTCCGCGGGCGGTACCTCC
AGGACTGGCTCGTCGATCCCGAGGCGCCGTGGGCGTGGCGGATGGACGCCGAGATGGCCGGATCCGGCGC
GCTCGGCGACCTCGGCGCGCACACGATCGACCTCGCGAACTTCCTCGTCGGCGACGCTGTCGGCGGGATC
GACCGCGTCTCGGGACAGCTGACGACGTTCGTCGACGAGCGGCCCGTCTACGACGACGAGGGGGAGATAG
AGGAGTACCGCGACGTGACGGTCGACGACGCGTACGACGCGCAGGTCGCCTACGAGTCGGGCGCGACCGG
GAGCTTCGAGGCGAGCCGCGTCGCCGAGGGGCACAAGAACGACCACACGATCGCGGTCCACGGATCGAAG
GGAAGCTTGAGGTTCTCCCTGGAGCGGCTGAACGAACTGGAGGTGCTCCGCGAGGGGAACCGCGGCTACG
AGACGGTGCTGGTGACCGAGGAGTCGGACCCGTACGTCGACCGCTGGTGGCCCCCCGGGCACGTGATCGG
GTGGGAGCACACGTTCGTACACGAGAACTACGAGTTCCTCTCGGCGGTCGCCGAGGGCCGGCCGTTCGAG
CCGTCGTTCGAAGAGGGGTACGAGGTCCAGCGCGCGCTCGCGGCGATCGAGCGCGCCGACGAGCGCGGGG
AGTGGGTCGCGGTCGAGTAG

>Halorubrum_californiensis-00328
ATGACCGACGAACCACTGAAGATCGGCGTGCTGGGGTATCGATTCATGGGCAAGGCGCACGCGAACGCGA
TGGCGCGGCTCCCGATGTTCTTCCCGGACGCGCCCGAGGTCGAGCGACACACGCTCGTCGGGCGCGACGA
GGCGGCGCTCGCGGACGCGGCCGAGCGGTTCGGCTTCTCGCACACCGTGACCGACTGGGAGGCCGCGCTC
GACGAGGTGGACGTCTTCTACAACCTCGGGCCGAACCACGTCCACGCGGAGCCGTCGATCGCGGCCCTCG
AAGCGGGGATTCCCGTTCTCTGCGAGAAGCCGCTCGCGCCGACGATGGCGGAGGCGGCGGCGATGCGCGA
CGCGGCGGCCGCGGCCGACGTGCCCGCGGGCGCCGCGTTCAACTACCGGTTCGTCCCCGCGATCCGGTAC
GCGAAGGGGCTGATCGAGGACGGCGAACTGGGCGAGATCCGACAGGTCCGCGGGCGCTACCTCCAGGACT
GGCTCGTCGACCCCGAGGCGCCGTGGGCGTGGCGGATGGACGCCGACATGGCCGGGTCGGGCGCGCTCGG
CGACCTCGGGGCGCACACGATCGACCTCGCGAACTTCCTCGTCGGCGACGCGGTCGGCGGGATCGACCGC
CTCTCCGGACGGCTGACGACGTTCGTCGACGAACGGCCCGTCTACGACGACGAAGGGGTAATCGAGGAGT
ACCGCGACGTGACGGTCGACGACGCGTACAGCGCGCAGGTCGCCTACGAGTCGGGCGCGACGGGGAGCTT
CGAGGCGAGCCGCGTCGCCGAGGGGCACAAGAACGACCACACGATCGCGGTTCACGGGACGGCGGGGAGC
CTGACGTTCTCCTTGGAGCGGCTCAACGAACTGGAGGTGCTGCGCGAGGGGAACCGCGGCTACGAGACGG
TGCTGGTCACCGAGGAGACGGACCCGTACGTCGACCGCTGGTGGCCCCCCGGACACGTGATCGGGTGGGA
GCACACGTTCGTTCACGAGAGTTACGAGTTCCTCTCGGCGGTCGCCGAGGGCGGATCGTTCGAGCCGTCG
TTCGAGGACGGGTACGAGGTCCAGCGCGTCCTCGCGGCGATCGAGCGATCCGACGAGCGCGGCGAGCGGG
TCGCTGTCGAGTGA

>Halorubrum_californiensis-00329
ATGGACATCGGCGTGCTGACCGTCCCCTTGGGCGGCGAACCGATCGACGACGCGGCCGCGTACCTCGACG
GGATCGGCGTCGACGCCGTCGAACTCGGCGTTGGCGGCTGGCCCGGCGAGGACCACGTCGACCGCGAGCG
CCTCCTCGGCGACGAGGACGCGCGCGACGAACTGCTCGGGCTGCTCGACGACCGCGGCCTCCGGATCTCC
GCGCTGGCGACGCACAACAACCCGCTCCACCCGGACGAGGAGCGGGCCGCAGCGGCCGACCGCGAACTGT
GCGAGGCGATCGAACTGGCCGACCTGCTCGGCGTCGACACGGTCACGTGCTTCTCCGGGCTCCCCGCGGG
GGCGCCCGGCGACTCGACGCCGAACTGGGTCACGGCGCCGTGGCCGACCGAACACGCCGACGCGCTCGAC
TACCAGTGGGACGAGGTCGCGATCCCGTACTGGCGGGACCTGGCGAAGCACGCCGAGCATCACGGCGTCG
ACGTGGCCATCGAGATGCACCCGAACATGCTGGTGTACGAGCCGACCGGCATGCTCGCCCTCCGCGAGGC
GACGAACGACCGGATCGGGGCCAACTTCGACCCCTCGCACCTCTACTGGCAGGGGATAGACGTGACGGAG
GCGATCCGATTCCTCGGCGAGCGCGACGCGATCCACCACGTCCACGCGAAGGACACCAAGGTGTACGACG
CGAACGCCCGCCTGAAGGGCGTCCTCGACACGACGGGGTACGCCGAGGAGGCCGACCGCTCGTGGCTGTT
CCGCTCGATCGGTTACGGCCACGACGAGGGACACTGGAAGGATGTCGTCTCGACGCTGCGGATGGTCGGC
TACGAGGGCGCGCTGTCGATCGAACACGAGGACTCGCTCACGTCGTCGCGCGAGGGGCTGGAGAAGGCCG
TCGACGTGCTGGAGCGGGCCGTCTTCGAGACGGAACCGGGCGACGCGTACTGGGCGGAATGA

>Halorubrum_coriense-01462
ATGGACATCGGCGTGCTGACGGTTCCCCTCGGCGGCGAACCGATCGACGACGCGGCCGCGTCCCTCGCCG
AAATCGGGGTCGACGCCGTCGAACTCGGCGTCGGCGGGTGGCCCGGCGAGGATCACGTCGACCGCGGAGC
GCTCCTCGACGACGCGGCCGGGCGGGAGGAGTTACTCGCGCTGCTCGACGGTCACGGGCTCCGGATCTCC
GCGCTGGCGACGCACAACAACCCGCTCCACCCGGACGAGGAGCGGGCCGCGACCGCCGACCGCGAGCTGC
GCGAGGCGATCGAACTGGCCGACCTGCTCGGCGTCGACACGGTCACGTGCTTCTCCGGGCTCCCCGCGGG
CGCGCCCGGCGACTCGACGCCGAACTGGGTGACAGCGCCGTGGCCGACCGAACACGCCGACGCGCTCGAC
TACCAGTGGGACGAGGTCGCGATCCCGTACTGGCGCGACCTGGCGGCGCACGCCGACCGCCACGGCGTCG
ACGTGGCGATCGAGATGCACCCGAACATGCTGGTGTACGAGCCGACCGGGCTGGTCGCGCTCCGCGAGGC
GACCGGCGAGCGGATCGGGGCCAACTTCGACCCCTCGCACCTCTACTGGCAGGGGATCGACGCGACGGAG
GCGATCCGGTTCCTCGGCGCGCGCGACGCGATCCACCACGTCCACGCGAAGGACACCAAGGTGTACGACG
CGAACGCCCGCGTGAAGGGCGTCCTCGACACGACGGGCTACGCCGATGAGGCCGACCGCTCGTGGCTGTT
CCGCTCGATCGGGTACGGACACGGCGAGGGACACTGGAAGGACCTCGTCTCGACGCTCCGGATGGTCGGC
TACGAGGGCGCGCTCTCCATCGAACACGAGGACTCGCTCACGTCGGCGCGGGAGGGGTTAGCGAAGGCCG
TCGACGTGCTGGAGCGGGCCGTCTTCGAGACGGAACCGGGCGAGGCGTACTGGGCGGAGTAA

>Halorubrum_coriense-01463
ATGACACCGGAACCACTGAAGATCGGCGTACTGGGGTATCGCTTCATGGGCAAGGCGCACGCGAACGCGC
TCGCGCGCCTGCCGATGTTCTTCCCGGACGCGCCCGAGGTCGAGCGGCACATGCTCGTCGGGCGCGACGA
GGAAGCGCTCGCGGACGCGGCCGACCGGCTCGGCTTCGCGCACACCGCGACCGACTGGGAGGCGGCGCTC
GACGAGGTGGACGTCTTCTACAACCTCGGCCCGAACCACGTCCACGCGGAGCCGTCGATCGCGGCGCTCG
AAGCCGGGGTTCCCGTCCTCTGCGAGAAGCCGCTCGCGCCGACGCTGGAGGCGGCGGCGGCGATGCGCGA
CGCGGCGGCCGCGACGGGCGTCACCGCCGGGACCGCGTTCAACTACCGGTTCGTGCCCGCGATCCGGCAC
GCGAAGGGGCTGATCGAGGACGGCGAGCTGGGCGAGATCCGACAGGTCCGCGGGCGCTACCTCCAGGACT
GGCTCGTCGACCCCGAAGCGCCGTGGGCGTGGCGAATGGACGCGGAGCTGGCCGGGTCCGGCGCGCTCGG
CGACCTCGGCGCGCACACGATCGACCTCGCGAGGTTCCTCGTCGGCGACCGGGTCGGCGGGGTCGACCGC
GTCTCGGGGCAGCTGACGACGTTCGTCGACGAGCGGCCCGTCTACGACGAGGACGGCGGGGTCGCGGAGT
ACCGGGACGTGACCGTCGACGACGCATACAGCGCGCAGGTCGAGTACGAGTCGGGCGCGACCGGGACCTT
CGAGGCGAGTCGGGTCGCGGCGGGCCACAAGAACGACCACGCGATCGCGGTCCACGGGACGGCGGGGAGC
CTGACGTTCTCACTTGAGCGGCTCAACGAACTGGAGGTGTTACGCGCGGGGAACCGCGGCTACGAGACGG
TGCTGGTCACCGAGGAGTCGGACCCGTACGTCGACCGCTGGTGGCCCCCCGGACACGTGATCGGGTGGGA
GCACACGTTCGTCCACGAGAGCTACGAGTTCCTCTCGGCGGTGGCCGACGGCGGCGCGTTCGAACCGTCG
TTCGAGGACGGGTACGCGGTCCAGCGGATCCTCGCGGCGGTCGAACGCGCAGACGAGCGGGGCGAGTGGG
TCGCGGTCGAGTGA

>Halorubrum_distributum_JCM_10118-02337
ATGACCGACGAACCACTGAAGATCGGCGTTCTGGGGTATCGATTCATGGGCAAGGCGCACGCGAACGCGA
TGGCGCGGCTCCCGATGTTCTTCCCGGACGCGCCCGAGATCGAGCGCCACACGCTCGTCGGGCGCGACGA
GGCGGCGCTCGCGGACGCGGCCGAGCGGTTCGGCTTCTCGCACACCGCGACCGACTGGGAGGCCGCGCTC
GACGAGGTGGACGTCTTCTACAACCTCGGGCCGAACCACGTCCACGCGGAGCCGTCGATCGCGGCCCTCG
AAGCGGGGGTCCCCGTCCTCTGCGAGAAGCCGCTCGCGCCGACGATGGCGGAGGCGGCGGCGATGCGCGA
CGCGGCGGCCGCGACGGGCGTCACGGCCGGGGCCGCGTTCAACTACCGCTTCGTCCCCGCGATCCGCTAC
GCGAAGGGGCTGATAGAGGACGGGGAACTCGGCGATATCCGGCAGGTCCGCGGGCGGTACCTCCAGGACT
GGCTCGTCGATCCCGAGGCGCCGTGGGCGTGGCGGATGGACGCCGAGATGGCCGGATCCGGCGCGCTCGG
CGACCTCGGCGCGCACACGATCGACCTCGCGAACTTCCTCGTCGGCGACGCTGTCGGCGGGATCGACCGC
GTCTCGGGACAGCTGACGACGTTCGTCGACGAGCGGCCCGTCTACGACGACGAGGGGGAGATAGAGGAGT
ACCGCGACGTGACGGTCGACGACGCGTACGACGCGCAGGTCGCCTACGAGTCGGGCGCGACCGGGAGCTT
CGAGGCGAGCCGCGTCGCCGAGGGGCACAAGAACGACCACACGATCGCGGTCCACGGATCGAAGGGAAGC
TTGAGGTTCTCCCTGGAGCGGCTGAACGAACTGGAGGTGCTCCGCGAGGGGAACCGCGGCTACGAGACGG
TGCTGGTGACCGAGGAGTCGGACCCGTACGTCGACCGCTGGTGGCCCCCCGGGCACGTGATCGGGTGGGA
GCACACGTTCGTACACGAGAACTACGAGTTCCTCTCGGCGGTCGCCGAGGGCCGGCCGTTCGAGCCGTCG
TTCGAAGAGGGGTACGAGGTCCAGCGCGCGCTCGCGGCGATCGAGCGCGCCGACGAGCGCGGGGAGTGGG
TCGCGGTCGAGTAG

>Halorubrum_distributum_JCM_10118-02338
ATGGACATCGGCGTGCTAACGGTTCCCTTGGGCGACGAACCGCTCGACGACGCGGCCGCGTACCTCGACG
GGATCGGCGTCGACGCCGTCGAACTCGGCGTCGGCGGCTGGCCCGGCGAGGACCACGTCGACCGCGAGGC
GCTCCTGGACGACGCGGCGGCCCGCGAGGACCTCCGGGCGCTGCTCGACGACCACGACCTCCGGATCTCC
GCGCTGGCGACGCACAACAACCCGCTCCATCCCGACGAGGAGCGGGCCGCGGCGGCCGACCGCGAGCTGC
GCGAGGCGATCGAGCTGGCGGACCAGCTGGGCGTCGACGCGGTGACCTGCTTCTCCGGGCTCCCCGCCGG
GGCGCCCGGCGACTCGACGCCGAACTGGGTCACGGCGCCGTGGCCGACGGAACACGCCGACGCGCTCGAC
TACCAGTGGGACGAGGTCGCGATCCCCTACTGGCGCGACCTGGCGCAGCACGCCGAGCATCACGGCGTCG
ACGTGGCGATCGAGATGCACCCGAACATGCTGGCCTACGAGCCGACCGGGCTGCTCGCGCTCCGGGAGGC
GACGAACGACCGGATCGGGGCCAACTTCGACCCCTCGCACCTCTACTGGCAGGGGATCGACGTGACGGAG
GCGATCCGCTTCCTCGGCGAGCGCGACGCGATCCACCACGTCCACGCGAAGGACACCAAAGTGTACGACG
CGAAGGCCCGCGTGAAGGGCGTCCTCGACACGACCGGCTATGCCGAGGAGGCCGACCGCTCGTGGCTGTT
CCGCTCGATCGGCTACGGCCACGGCGAGGAACACTGGAAGGACGTCGTCTCGACGCTCCGGATGGTCGGC
TACGAGGGCGCGCTGTCGATCGAACACGAGGACTCGCTCACGTCGTCCCGGGAGGGGTTAGAGAAGGCCG
TCGACGTGCTCGACCGCGCGGTGTTCGAGACGGAACCGGGCGACGCCTACTGGGCGGAGTGA

>Halorubrum_litoreum-00196
ATGACCGACGAACCACTGAAGATCGGCGTTCTGGGGTATCGATTCATGGGCAAGGCGCACGCGAACGCGA
TGGCGCGGCTCCCGATGTTCTTCCCGGACGCGCCCGAGATCGAGCGCCACACGCTCGTCGGGCGCGACGA
GGCGGCGCTCGCGGACGCGGCCGAGCGGTTCGGCTTCTCGCACACCGCGACCGACTGGGAGGCCGCGCTC
GACGAGGTGGACGTCTTCTACAACCTCGGGCCGAACCACGTCCACGCGGAGCCGTCGATCGCGGCCCTCG
AAGCGGGGGTCCCCGTCCTCTGCGAGAAGCCGCTCGCGCCGACGATGGCGGAGGCGGCGGCGATGCGCGA
CGCGGCGGCCGCGACGGGCGTCACGGCCGGGGCCGCGTTCAACTACCGCTTCGTCCCCGCGATCCGCTAC
GCGAAGGGGCTGATAGAGGACGGGGAACTCGGCGATATCCGGCAGGTCCGCGGGCGGTACCTCCAGGACT
GGCTCGTCGATCCCGAGGCGCCGTGGGCGTGGCGGATGGACGCCGAGATGGCCGGATCCGGCGCGCTCGG
CGACCTCGGCGCGCACACGATCGACCTCGCGAACTTCCTCGTCGGCGACGCTGTCGGCGGGATCGACCGC
GTCTCGGGACAGCTGACGACGTTCGTCGACGAGCGGCCCGTCTACGACGACGAGGGGGAGATAGAGGAGT
ACCGCGACGTGACGGTCGACGACGCGTACGACGCGCAGGTCGCCTACGAGTCGGGCGCGACCGGGAGCTT
CGAGGCGAGCCGCGTCGCCGAGGGGCACAAGAACGACCACACGATCGCGGTCCACGGATCGAAGGGAAGC
TTGAGGTTCTCCCTGGAGCGGCTGAACGAACTGGAGGTGCTCCGCGAGGGGAACCGCGGCTACGAGACGG
TGCTGGTGACCGAGGAGTCGGACCCGTACGTCGACCGCTGGTGGCCCCCCGGGCACGTGATCGGGTGGGA
GCACACGTTCGTGCACGAGAACTACGAGTTCCTCTCGGCGGTCGCCGAGGGCCGGCCGTTCGAGCCGTCG
TTCGAAGATGGGTACGAGGTCCAGCGCGCGCTCGCGGCGGTCGAGCGCGCCGACGAGCGCGGGGAGTGGG
TCGCGGTCGAGTAG

>Halorubrum_litoreum-00197
ATGGACATCGGCGTGCTAACGGTTCCCTTGGGCGACGAACCGCTCGACGACGCGGCCGCGTACCTCGACG
GGATCGGCGTCGACGCCGTCGAACTCGGCGTCGGCGGCTGGCCCGGCGAGGACCACGTCGACCGCGAGGC
GCTCCTGGACGACGCGGCGGCCCGCGAGGACCTCCGGGCGCTGCTCGACGACCACGACCTCCGGATCTCC
GCGCTGGCGACGCACAACAACCCGCTCCATCCCGACGAGGAGCGGGCCGCGGCGGCCGACCGCGAGCTGC
GCGAGGCGATCGAGCTGGCGGACCAGCTGGGCGTCGACGCGGTGACCTGCTTCTCCGGGCTCCCCGCCGG
GGCGCCCGGCGACTCGACGCCGAACTGGGTCACGGCGCCGTGGCCGACGGAACACGCCGACGCGCTCGAC
TACCAGTGGGACGAGGTCGCGATCCCCTACTGGCGCGACCTGGCGCAGCACGCCGAGCATCACGGCGTCG
ACGTGGCGATCGAGATGCACCCGAACATGCTGGTGTACGAGCCGACCGGGCTGCTCGCGCTCCGGGAGGC
GACGAACGACCGGATCGGGGCCAACTTCGACCCCTCGCACCTCTACTGGCAGGGGATCGACGTGACGGAG
GCGATCCGCTTCCTCGGCGAGCGCGACGCGATCCACCACGTCCACGCGAAGGACACCAAAGTGTACGACG
CGAAGGCCCGCGTGAAGGGCGTCCTCGACACGACCGGCTACGCCGAGGAGGCCGACCGCTCGTGGCTGTT
CCGCTCGATCGGCTACGGCCACGGCGAGGAACACTGGAAGGACGTCGTCTCGACGCTCCGGATGGTCGGC
TACGAGGGCGCGCTGTCGATCGAACACGAGGACTCGCTCACGTCGTCCCGGGAGGGGTTAGAGAAGGCCG
TCGACGTGCTCGACCGCGCGGTGTTCGAGACGGAACCGGGCGACGCCTACTGGGCGGAGTGA

>Halorubrum_hochstenium-02690
ATGACACATGAAACACAGAAGGTCGGCGTGCTGGGGTATCGATTCATGGGAAGAGCGCACGCGAACGCGC
TCGCGCGCCTCCCGATGTTCTTCCCGGACGCCCCCGAGGTCGAGCGGCACACGCTCGTCGGGCGCGACGA
AAACGCCCTCGCAGAGGCGGCCGACCGGTTCGGCTTCGCGCACACCGCGACCGACTGGGAGGCGGCGATA
GACGCGGTGGACGTCTTCTACAACCTCGGCCCGAACCACGTCCACGCGGAGCCGTCGATCGCGGCCCTCG
AAGCGGGGGTCCCCGTCCTCTGTGAGAAGCCGCTCGCGCCGACGCTGGAGGAGGCCGCGGCGATGCGCGA
CGCCGCGGCCGCGACCGGCGCGACCGCCGGCACCGCGTTCAACTACCGGTTCGTCCCCGCGATCCGGTAC
GCGAAGGGACTGATCGAGGACGGCGAACTCGGCGAGATACGACAGGTCCGCGGGCGCTACCTCCAGGACT
GGCTCGTCGACCCGGAGGCCCCGTGGGCGTGGCGGATGGACGCCGACATGGCCGGATCGGGCGCGCTCGG
CGACCTCGGCGCGCACACGATCGACCTCGCGAACTTCCTCGTGGGCGAGGCGGTCGGGGGGATCGACCGC
GTCTCCGGGCAGTTGACGACGTTCGTCGACGAGCGCCCGGTGTACGCCGACGACGACGCGGCGGGCGAAG
CCGACGCCGAGGTCGCGGAGTACCGCGACGTGACCGTCGACGACGCCTACAGCGCGCAGGTCGCCTACGA
GTCGGGCGCGACCGGGACCTTCGAGGCCACGCGGGTCGCCGAGGGGCACAAGAACGACCACACGATCGCG
GTCCACGGCTCGAAGGGGAGCGTGAAGTTCTCCTTGGAGCGCCTCAACGAACTGGAGGTGCTCCGCGAGG
GGAACCGCGGCTACGAGACGGTGTTAGTCACCGAGGAGACGGACCCGTACGTGGACCGCTGGTGGCCCCC
CGGCCACGTGATCGGGTGGGAGCACACGTTCGTCCACGAGAGCTACGAGTACCTCTCGGCGGTCGCGGAA
GGCGGGTCGTTCGAGCCGTCGTTCGCTGACGGGTACGAGGTCCAGAAGGTACTCGCGGCGATCGAGCGGG
CCGACGAGCGCGGCGAGTGGGTCGAAGTCTAA

>Halorubrum_hochstenium-02691
ATGGACATCGGCGTCTTGACCGTTCCCCTCGGCGGCGAACCGATCGACGACGCGGCCGCGTACCTCGCCG
GGCTCGGCGTCGACGCCGTCGAACTCGGCGTCGGCGGGTGGCCCGGACAGGACCACGTCGACCGCGAGCG
GCTCCTTGACGACGAGGCGGCGCGGCAGGAACTCCGGGGAGTTCTCGACGACCACGGGCTCCGGATCTCC
GCGCTCGCGACGCACAACAACCCGCTTCACCCCGACGAGGAGCGGGCCGCGACGGCGGACCGCGAACTGC
GCGAGGCGATCGGACTGGCCGACCTGCTCGGCGTCGACACGGTGACGTGCTTCTCGGGACTCCCCGCGGG
CGCGCCGGGCGACTCGACGCCGAACTGGGTCACGGCCCCGTGGCCGAGCGAACACGCCGACGCGCTCGAC
TACCAGTGGGACGAGGTCGCGGTCCCGTACTGGTCGGACCTCGCCGAACACGCCGCGCACCACGGCGTCG
ACGTGGCTATCGAGATGCACCCGAACATGCTCGTGTACGAGCCGACCGGCATGCTCGCGCTCCGGGAGGC
GACGAACGAGCGGATCGGCGCGAACTTCGACCCGTCGCACCTCTACTGGCAGGGGATCGACGTGCCCGAG
GCGATCCGCTTCCTCGGCGAGCGCGACGCGATCCACCACGTCCACGCCAAGGACACGAGGGTGTACGAGT
CCAACTCGCGGGTGAAGGGCGTCCTCGACACGACGGGGTACGCCGACGAGGCGGACCGCTCGTGGCTGTT
CCGCTCGATCGGCTACGGTCACGGGGAGGACCACTGGAAGGACGTGGTCTCGACGCTCCGGATGGTCGGC
TACGAGGGCGCGCTGTCGATCGAACACGAGGACTCGCTCACCTCCTCGCGCGAGGGGTTGGAGAAGGCGG
TCGACGTGTTGGACCGAGCCGTCTTCGAGACCGAACCGGGCGACGCGTACTGGGCTGAGTGA

>Halorubrum_terrestre-01713
TTGGGCGACGAACCGCTCGACGACGCTGCCGCGTACCTCGACGGGATCGGCGTCGACGCCGTCGAACTCG
GCGTCGGCGGCTGGCCCGGCGAGGACCACGTCGACCGCGAGGCGCTCCTGGACGACGCGGCGGCCCGCGA
GGACCTCCGGGCGCTGCTCGACGACCACGACCTCCGGCTCTCCGCGCTGGCGACGCACAACAACCCGCTC
CATCCCGACGAAGAGCGGGCCGCGGCGGCCGACCGCGAACTGCGCGAGGCGATCGAGCTGGCGGACCAGC
TGGGCGTCGACGCGGTGACCTGCTTCTCCGGGCTCCCCGCCGGGGCGCCCGGCGACTCGACGCCGAACTG
GGTCACGGCGCCGTGGCCGACGGAACACGCCGACGCGCTCGACTACCAGTGGGACGAGGTCGCGATCCCC
TACTGGCGCGACCTGGCGCAGCACGCCGAGCATCACGGCGTCGACGTGGCGATCGAGATGCACCCGAACA
TGCTGGCCTACGAGCCGACCGGGCTGCTCGCGCTCCGGGAGGCGACGAACGACCGGATCGGGGCCAACTT
CGACCCCTCGCACCTCTACTGGCAGGGGATCGACGTGACGGAGGCGATCCGCTTCCTCGGCGAGCGCGAC
GCGATCCACCACGTCCACGCGAAGGACACCAAAGTGTACGACGCGAAGGCCCGCGTGAAGGGCGTCCTCG
ACACGACCGGCTACGCCGAGGAGGCCGACCGCTCGTGGCTGTTCCGCTCGATCGGCTACGGCCACGGCGA
GGGACACTGGAAGGACGTCGTCTCGACGCTCCGGCTGGTCGGCTACGAGGGCGCGCTGTCGATCGAACAC
GAGGACTCGCTCACGTCGTCCCGGGAGGGGTTAGAGAAGGCCGTCGACGTGTTGGACCGAGCAGTCTTCG
AGACGGAGCCGGGCGACGCCTACTGGGCGGAGTGA

>Halorubrum_terrestre-01714
ATGACCGACGAACCACTGAAGATCGGCGTTCTGGGGTATCGATTCATGGGCAAGGCGCACGCGAACGCGA
TGGCGCGGCTCCCGATGTTCTTCCCGGACGCGCCCGAGATCGAGCGCCACACGCTCGTCGGGCGCGACGA
GGCGGCGCTCGCGGACGCGGCCGAGCGGTTCGGCTTCTCGCACACCGCGACCGACTGGGAGGCCGCGCTC
GACGAGGTGGACGTCTTCTACAACCTCGGGCCGAACCACGTCCACGCGGAGCCGTCGATCGCGGCCCTCG
AAGCGGGGGTCCCCGTCCTCTGCGAGAAGCCGCTCGCGCCGACGATGGCGGAGGCGGCGGCGATGCGCGA
CGCGGCGGCCGCGACGGGCGTCACGGCCGGGGCCGCGTTCAACTACCGCTTCGTCCCCGCGATCCGCTAC
GCGAAGGGGCTGATAGAGGACGGGGAGCTCGGCGATATCCGGCAGGTCCGCGGGCGGTACCTCCAGGACT
GGCTCGTCGACCCCGAGGCGCCGTGGGCGTGGCGGATGGACGCCGAGATGGCCGGATCGGGCGCGCTCGG
CGACCTCGGCGCGCACACGATCGACCTCGCGAACTTCCTCGTCGGCGACGCTGTCGGCGGGATCGACCGC
GTCTCGGGACAGCTAACGACGTTCGTCGACGAGCGGCCCGTCTACGACGACGAGGGGGAGATAGAGGAGT
ACCGCGACGTGACGGTCGACGACGCGTACGACGCGCAGGTCGCCTACGAGTCGGGCGCGACCGGGAGCTT
CGAGGCGAGCCGCGTCGCCGAGGGGCACAAGAACGACCACACGATCGCGGTCCACGGATCGAAGGGAAGC
TTGAGGTTCTCCCTGGAGCGGCTGAACGAACTGGAGGTGCTCCGCGAGGGGAACCGCGGCTACGAGACGG
TGCTGGTGACCGAGGAGTCGGACCCGTACGTCGACCGCTGGTGGCCCCCCGGGCACGTGATCGGGTGGGA
GCACACGTTCGTACACGAGAACTACGAGTTCCTCTCGGCGGTCGCCGAGGGCCGGTCGTTCGAGCCGTCG
TTCGAAGAGGGGTACGAGGTCCAGCGCGCGCTCGCGGCGGTCGAGCGCGCCGACGAGCGCGGGGAGTGGG
TCGCGGTCGAGTAG

>Haloferax_denitrificans-02175
ATGTACATCGGAGTGCTCACCGTCCCACTCGGAGACGAACCCCTCGACGACGCGCTCGACTATCTGTCGG
GTATCGGCGTCGACGGCGTCGAACTCGGCGTCGGCGGCTGGCCCGGCGAGGACCACGTCGACCGAAGCGC
CCTCGTCGCGGACGAAGAGGCGCAGGCCGCCCTCCTCGATTCGGTCGAGAGCCGAGACCTGCAAATCAGC
GCGCTCGCCACGCACAACAACCCGCTCCACCCCGACGAGGAGACGGCCGCCGAGGCCGACACCGAACTCC
GCGAGGCAATCGAACTCGCGGACGCCCTCGACGTGAACACCGTCACCTGTTTCTCGGGGCTCCCCGCCGG
CGGCCCGAACGACGAGGTGCCGAACTGGATTACCGCGCCGTGGCCGACCGAGCACGCCGACGCCCACGAC
TACCAGTGGGAGGTCGCCGTCGACTACTGGTCCGACCTCGCCGCGTTCGCCGACGACCACGGCGTCGACA
TCGCCATCGAGATGCACCCAAACATGCTCGTCTACGAGCCGACCGGGATGCTGAAGCTCCGCGAGGCGAC
CAACGAGCGCGTCGGCGCGAACTTCGACCCCTCGCACCTCTACTGGCAGGACATCTCCATCACCGACGCG
ATTCGGTTCCTCGGCGAGGAAGACGCCATCCACCACTTCCACGCGAAGGACACGAAGGTCTACGAGTCCG
AGTCGCGCATCAAGGGCGTCCTCGACACGACCTCCTACGCGGACACCGCCGACCGCTCGTGGCTGTTCCG
CTCTATCGGCTACGGCCACGACGAGGGCCACTGGAAGGACGTGGTGTCGACGCTCCGGATGGTCGGCTAC
GAGGGCGCGCTCTCCATCGAACACGAGGACGCGCTCACGTCGTCCAAGGAGGGCCTCGAAAAGGCCGTCG
ACGTGCTCTCGCGCGCCGTCTTCGAGACGCAACCCGGCGACGCCTACTGGGCGGAGTAA

>Haloferax_denitrificans-02176
ATGACTGAACCACTCACCGTCGGCGTCCTCGGTTACCGATTCATGGGGAAGGCGCACTCCAACGCGCTCG
CCCGCCTGCCGATGTTCTTCCCGGACGCGCCCGACGTGGAGCGCTCGGTCATCGTCGGCCGCGACGAGGA
GGCGCTTTCCGACGCCGCAGACCGCTTCGGCTTCGAATCGACGGCGACCGACTGGCGCGACGTGGTCGAC
GACGTGGACGTGTTCTACAACCTCGGGCCGAACCACCTCCACGCCGAGCCCTCTATCGCCGCGCTCGAAG
CCGGTGCCAGCGTCTTCTGCGAGAAGCCGCTCGCGCCGACGCTCGACGAGGCCGAGGCGATGCGCGACGC
CGCCCGCGCGGCCGACGGCGTCGCCGGCTGTGCGTTCAACTACCGGTTCGTGCCCGCAATCCGGTACGCG
AAGCGACTCATCGAGGACGGCGAACTCGGCGAGATTCGACACGTCCGCGGGCGCTACTTACAGGACTGGC
TCGTCGACGCCGACGCGCCGTGGACGTGGCGCATGGACGAAGACGCCGCCGGCTCCGGCGCGCTCGGCGA
CCTCGGCGCGCACACGGTCGACCTCGTTCGGTTCCTCGTCGGCGACCGCGCCGGCGACATCGACCGCATC
TCGGGCCACCTCCAGACGTTCGTCGACGAGCGACCCGTGCCCGGCACGGACGAGTACAGGCCCGTGACCG
TCGACGACGCCTACACCGCGCAGGCCGAGTTCGAAAACGGCGCGGTCGGGAGCTTCGAGGCCTCGCGCTT
CGCCGACGGCCACAAGAACGACCACAGCATCGAGATTCACGGCTCCGAGGGAAGCCTGCAGTTCTCGCTC
GAACGCCTCAACGAACTGGAGGTGAAAACCGGCGACGCCCGCGGCTACGAGACGGTTCTCGTCACCGACG
AGACGGACCCCTACCTCGACCACTGGTGGCCGCCGGGCCACGTCCTCGGCTGGGAACACACGTTCGTCCA
CGAGAACTACGAGTTCCTGTCGGCGGTCGCCGACGGCGGCGACTTTTCGCCGTCGTTCGAGGACGGCTAC
GAGGTGCAGGCGGTTCTCGACGCCATCGAGCGCTCCGACGAGGCCGGCGGGTGGGTCAGCCTCGGCTGA

>Haloferax_gibonsii-02760
ATGTACATCGGAGTGCTCACCGTCCCGCTCGGAGACGAACCCCTCGACGACGCGCTCGACTACCTGTCCG
GTATCGGCGTCGACGGCGTCGAACTCGCCGTCGGCGGCTGGCCCGGCGAGGACCACGTCGACCGAAGCGC
CGTCCTCGCGGACGACGACGCGCAGGCCGACCTCCTCGATTCGGTCGAGAGTCGAGACCTGCAAATCAGC
GCGCTCGCGACGCACAACAACCCGCTTCACCCCGTCGAGGAGACGGCCGCCGAGGCCGACACCGAACTCC
GCGAGGCCATCGAACTCGCGGACGCCCTCGACGTGAACACCGTCACCTGTTTCTCGGGACTCCCCGCCGG
CGGCCCGAACGACGAGGTCCCGAACTGGATTACCGCGCCGTGGCCGACCGAGCACGCCGACGCCCACGAC
TACCAGTGGGAGGTCGCCGTCGACTACTGGTCGGACCTCGCCGCGTTCGCCGACGACCACGGCGTCGACA
TCGCCATCGAGATGCACCCGAACATGCTCGTCTACGAGCCCACGGGCATGCTGAAGCTCCGCGAGGCGAC
GAACGAGCGCATCGGCGCGAACTTCGACCCCTCGCACCTCTACTGGCAGGACATCTCCATCACCGACGCG
ATTCGGTTCCTCGGCGAGGAGGACGCCATCCACCACTTCCACGCGAAGGACACGAAGGTCTACGAGTCCG
AGTCGCGCATCAAGGGCGTCCTCGACACGACCTCCTACGCGGACACCGCCGACCGCTCGTGGCTCTTCCG
CTCTATCGGCTACGGCCACGACGAGGGCCACTGGAAGGACGTGGTCTCGACGCTCCGGATGGTCGGCTAC
GAGGGCGCGCTCTCCATCGAACACGAGGACGCGCTCACGTCGTCCAAGGAGGGGCTCGAAAAGGCCGTCG
ACGTGCTCTCGCGGGCCGTCTTCGAGACGCAACCCGGCGAAGCCTACTGGGCGGAGTAA

>Haloferax_gibonsii-02761
ATGACTGAACCGCTCTCAGTCGGCGTCCTCGGCTACCGCTTCATGGGGAAGGCGCACTCCAACGCGCTCG
CCCGCCTGCCGATGTTCTTCCCCGACGCGCCCGACGTGGAGCGCTCCGTCATCGTCGGCCGCAACGAGGA
GGCGCTCGCCGACGCCGCCGACCGGTTCGGCTTCGAATCGACTGCGACCGACTGGCGCGACGTGGTCGAC
GACGTGGACGTGTTCTACAACCTCGGCCCGAACCACCTCCACGCCGAACCCTCCGTCGCCGCGCTCGAAG
CCGGTGCCAGCGTCTTCTGCGAGAAGCCGCTCGCGCCGACGCTCGACGAGGCCGAGGCGATGCGCGACGC
CGCCCGCGCGGCCGACGGCGTCGCCGGCTGCGCGTTCAACTACCGCTTCGTCCCCGCCATCCAGTACGCG
AAAGGACTCATCGAGAACGGCGAACTCGGCGAGATTCGGCACGTCCGCGGGCGCTATCTCCAGGACTGGC
TCGTCGACCCCGAAGCGCCGTGGTCGTGGCGAAACGACGCGGAACTCGCCGGCTCCGGCGCGCTCGGCGA
CCTCGGCGCGCACACGGTCGACCTCGCGCGCTTCCTCGTCCGCGACGCCGCGGGCGACATCGAACGCATC
TCCGGGCACCTCCAGACGTTCGTCGACGAGCGGCCCGTGCCCGGCGCGGACGAGTACAAGCCCGTGACCG
TCGACGACGCCTACACCGCGCAGGCGGAGTTCGGAAACGGCGCGGTCGGGAACTTCGAGGCCTCGCGGTT
CGCCGACGGGCACAAGAACGACCACACCATCGAGGTTCACGGCTCCGAGGGGAGCCTGCAGTTCTCGCTC
GAACGCCTCAACGAACTGGAGGTGAAGACCGGCGACGCCCGCGGCTACGAGACGGTGCTCGTCACCGACG
AGGACGACCCCTACCTCGACCACTGGTGGCCCCCGGGCCACGTCCTCGGCTGGGAACACACCTTCGTCCA
CGAGAACTACGAGTTCCTGTCGGCGGTCGCCGAGGGCGGCGAGTTCTCCCCCTCGTTCGAGGACGCCTAC
GAGGTCCAGACAGTGCTCGACGCCATCGAGCGCTCCGACGAGACCGGCGAGTGGGTCAGCCTCGGCTGA

>Haloferax_prahovense-00728
ATGTACATCGGAGTGCTCACCGTCCCGCTCGGAGACGAACCCCTCGACGACGCGCTCGACTACCTGTCCG
GTATCGGCGTCGACGGCGTCGAACTCGCCGTCGGCGGCTGGCCCGGCGAGGACCACGTCGACCGAAGCGC
CGTCCTCGCGGACGACGACGCGCAGGCCGACCTCCTCGACTCGGTCGAGAGCCGAGACCTGCAAATCAGC
GCGCTCGCGACGCACAACAACCCGCTTCACCCCGTCGAGGAGACGGCCGCCGAGGCCGACACCGAACTCC
GCGAGGCCATCGAACTCGCGGACGCCCTCGACGTGAACACCGTCACCTGTTTCTCGGGACTCCCCGCCGG
CGGCCCGAACGACGAGGTACCGAACTGGATTACCGCGCCGTGGCCGACCGAGCACGCCGACGCCCACGAC
TACCAGTGGGAGGTCGCCGTCGACTACTGGTCGGACCTCGCCGCGTTCGCCGACGACCACGGCGTGGACA
TCGCCATCGAGATGCACCCGAACATGCTCGTCTACGAGCCCACGGGCATGCTGAAGCTCCGCGAGGCGAC
GAACGAGCGCATCGGCGCGAACTTCGACCCCTCGCACCTCTACTGGCAGGACATCTCCATCACCGACGCG
ATTCGGTTCCTCGGCGAGGAGGACGCCATCCACCACTTCCACGCGAAGGACACGAAGGTCTACGAGTCCG
AGTCGCGCATCAAGGGCGTCCTCGACACGACCTCCTACGCGGACACCGCCGACCGCTCGTGGCTGTTCCG
CTCTATCGGCTACGGCCACGACGAAGGCCACTGGAAGGACGTGGTCTCGACGCTCCGGATGGTCGGCTAC
GAGGGCGCGCTCTCCATCGAACACGAGGACGCGCTCACGTCGTCCAAGGAGGGCCTCGAAAAGGCCGTCG
ACGTGCTCTCGCGGGCCGTCTTCGAGACGCAACCCGGCGAAGCCTACTGGGCGGAATAA

>Haloferax_prahovense-00729
ATGACTGAACCGCTCTCAGTCGGCGTCCTCGGCTACCGCTTCATGGGGAAGGCCCACTCCAACGCGCTCG
CCCGCCTGCCGATGTTCTTCCCCGACGCGCCCGACGTGGAGCGCTCCGTCATCGTCGGCCGCAACGAGGA
GGCGCTCGCCGACGCCGCAGACCGATTCGGCTTCGAATCGACCGCGACCGACTGGCGCGACGTGGTCGAC
GACGTGGACGTGTTCTACAACCTCGGCCCGAACCACCTCCACGCCGAACCCTCCGTCGCCGCGCTCGAAG
CCGGTGCTAGCGTCTTCTGCGAGAAGCCGCTCGCGCCGACGCTCGACGAGGCCAAGGCGATGCGCGACGC
CGCCCGCGCGGCCGACGGCGTCGCCGGCTGCGCGTTCAACTACCGCTTCGTCCCCGCCATCCGGTACGCG
AAGGGACTCATCGAAGACGGCGAACTCGGCGAGATTCGGCACGTCCGCGGGCGTTACCTGCAGGACTGGC
TCGTCGACCCCGAAGCGCCGTGGTCGTGGCGGAACGATGAGGAACTCGCCGGCTCCGGCGCGCTCGGCGA
CCTCGGCGCGCACACGGTCGACCTCGCGCGCTTCCTCGTCCGCGACGCCGCGGGCGACATCGAACGCATC
TCCGGGCACCTCCAGACGTTCGTCGACGAGCGGCCCGTGCCCGGCGCGGACGAGTACAAGCCCGTGACCG
TCGACGACGCCTACACCGCGCAGGCGGAGTTCGGAAACGGCGCGGTCGGGAACTTCGAGGCTTCGCGGTT
CGCCGACGGCCACAAGAACGACCACACCATCGAGATTCACGGCTCCGAGGGGAGCCTGCAGTTCTCGCTC
GAACGCCTCAACGAACTGGAGGTGAAGACCGGCGACGCCCGCGGCTACGAGACGGTGCTGGTCACCGACG
AGGACGACCCCTACCTCGACCACTGGTGGCCGCCGGGCCACGTCCTCGGCTGGGAACACACCTTCGTCCA
CGAGAACTACGAGTTCCTGTCGGCGGTCGCCGACGGCGGCGACTTCTCGCCCTCGTTCGAGGACGCCTAC
GAGGTTCAAGAAGTGCTCGACGCCATCGAGCGCTCCGACGAGACCGGCGAGTGGGTCAGCCTCGGCTGA

>Haloferax_sulfurifontis-02295
ATGTACATCGGAGTGCTCACCGTCCCGCTCGGAGACGAACCCCTCGACGACGCGCTCGACTATCTGTCGG
GTATCGGCGTCGACGGCGTCGAACTCGGCGTCGGCGGCTGGCCCGGCGAGGACCACGTCGACCGAAGCGC
CCTCGTCGCGGACGAGGACGCACAGGCCGCCCTCCTCGATTCGGTCGAGAGCCGAGACCTGCAAATCAGC
GCGCTCGCCACGCACAACAACCCGCTCCACCCCGACGAGGAGACGGCCGCCGAGGCCGACACCGAACTCC
GCGAGGCAATCGAACTCGCGGACGCCCTCGACGTGAACACCGTCACCTGTTTCTCGGGGCTCCCCGCCGG
CGGGCCGAACGACGAGGTGCCGAACTGGATTACCGCGCCGTGGCCGACCGAGCACGCCGACGCCCACGAC
TACCAGTGGGAGGTCGCCGTCGACTACTGGTCCGACCTCGCCGCCTTCGCCGACGACCACGGCGTCGACA
TCGCCATCGAGATGCACCCGAACATGCTCGTCTACGAGCCGACGGGGATGCTGAAACTCCGCGAGGCGAC
GAACGAGCGCGTCGGCGCGAACTTCGACCCCTCGCACCTCTACTGGCAGGACATCTCCATCACCGACGCG
ATTCGGTTCCTCGGCGAGGAGGACGCCATCCACCACTTCCACGCGAAGGACACGAAGGTCTACGAGTCCG
AGTCGCGCATCAAGGGCGTCCTCGACACGACCTCCTACGCGGACACCGCCGACCGCTCGTGGCTGTTCCG
CTCTATCGGCTACGGCCACGACGAGGGCCACTGGAAGGACGTGGTCTCGACGCTCCGGATGGTCGGCTAC
GAGGGCGCGCTCTCCATCGAACACGAGGACGCGCTCACGTCGTCTAAGGAGGGCCTCGAAAAGGCCGTCG
ACGTGCTCTCGCGCGCCGTCTTCGAGACGCAACCCGGCGACGCCTACTGGGCGGAGTAA

>Haloferax_sulfurifontis-02296
ATGACTGAACCACTCACCGTCGGCGTCCTCGGTTACCGATTCATGGGGAAGGCGCACTCCAACGCGCTCG
CCCGCCTGCCGATGTTCTTCCCCGACGCGCCCGACGTGGAGCGCTCGGTCATCGTCGGCCGCGACGAGGA
GGCGCTTTCCGACGCCGCCGACCGCTTCGGCTTCGAATCGACGGCGACCGACTGGCGCGACGTGGTCGAC
GACGTGGACGTGTTCTACAACCTCGGGCCGAACCACCTCCACGCCGAGCCCTCTATCGCCGCGCTCGAAG
CCGGTGCCAGCGTCTTCTGCGAGAAGCCGCTCGCGCCGACGCTCGACGAGGCCGAGGCGATGCGCGACGC
CGCCCGCGCGGCCGACGGCGTCGCCGGCTGTGCGTTCAACTACCGGTTCGTGCCCGCAATCCGGTACGCG
AAGGGACTCATCGAGGACGGCGAACTCGGCGATATTCGACACGTCCGCGGGCGCTACTTACAGGACTGGC
TCGTCGACGCCGACGCGCCGTGGACGTGGCGCATGGACGAAGACGCCGCCGGCTCCGGCGCGCTCGGCGA
CCTCGGCGCGCACACGGTCGACCTCGTTCGGTTCCTCGTCGGCGACCGCGCCGGCGACATCGAACGCCTC
TCGGGGCATCTCCAGACGTTCGTCGACGAGCGACCCGTCCCCGGCACGGACGAGTACAAGCCCGTCACCG
TCGACGACGCCTACACCGCGCAGGCCGAGTTCGAAAACGGCGCGGTCGGGAGCTTCGAGGCGTCTCGATT
CGCCGACGGCCACAAGAACGACCACACCATCGAGATTCACGGCTCCGAGGGAAGCCTGCAGTTCTCGCTC
GAACGCCTCAACGAACTGGAGGTGAAAACCGGCGACGCCCGCGGCTACGAGACGGTGCTCGTCACCGACG
AGACCGACCCCTACCTCGACCACTGGTGGCCGCCGGGCCACGTCCTCGGCTGGGAGCACACGTTCGTCCA
CGAGAACTACGAGTTCCTGTCGACGGTCGCCGAGGGCGGCGACTTCTCGCCGTCGTTCGAGGACGGCTAC
GAGGTCCAGAAAATCCTCGACGCCATCGAGCGCTCCGACGAGGCCGGCGAGTGGGTCAGCCTCGGCTGA

>Haloferax_sp_GUBF-1-01513
ATGACTGACCCGCTCTCTATCGGCGTCCTCGGCTACCGCTTTATGGGCAAGGCGCACTCCAACGCGCTCG
CCCGCCTGCCGATGTTCTTCCCCGACGCGCCCGACGTGGAGCGCTCCGTCATCGTCGGCCGCGACGAGGA
GGCGCTTTCCGACGCCGCCGACCGCTTCGGCTTCGAATCGACCGCAACCGACTGGCGCGACGTGGTCGAC
GACGTGGACGTGTTCTACAACCTCGGCCCGAACCACCTCCACGCCGAACCCTCCATCGCCGCGCTCGAAG
CCGGTGCCAGCGTCTTCTGCGAGAAGCCGCTCGCACCGACGCTCGACGAGGCCGAGGCGATGCGCGACGC
CGCCCGCGCGGCCGACGGCGTCGCCGGCTGCGCGTTCAACTACCGATTCGTGCCTGCCATCCGGTACGCG
AAGAAGCTCATCGAGAACGGCGAACTCGGCGAGATTCGACACGTCCGCGGGCGCTACTTGCAGGATTGGC
TCGTCGATTCCGACGCGCCGTGGACGTGGCGCATGGACGAAGACGCCGCCGGCTCCGGCGCGCTCGGTGA
CCTCGGCGCGCACACCATCGACCTCGTTCGGTTCCTCGTCGGTGACCGCGCCGGCGACATCGACCGCATC
TCGGGGCATCTCCAGACGTTCGTCGACGAGCGACCCGTGCCCGGCGAGGACGAGTACCGGCCCGTCACCG
TCGACGACGCCTACACCGCGCAGGCCGAGTTCGAAAACGGCGCGCTCGGGAGCTTCGAGGCCTCGCGCTT
CGCTGACGGCCACAAGAACGACCACAGCATCGAGATTCACGGCTCCGAGGGAAGCCTGCAGTTCTCGCTC
GAACGCCTCAACGAACTGGAGGTGAAAACCGGCGACGCCCGCGGCTACGAGACGGTACTCGTCACCGACG
AGGACGACCCCTACCTCGACCACTGGTGGCCGCCGGGCCACGTCCTCGGCTGGGAACACACGTTCGTCCA
CGAGAACTACGAGTTCCTGTCGGCGGCCGCCGACGGCGGCGAGTTCTCGCCGTCGTTCGAGGACGGCTAC
GAGGTCCAGTCGATTCTCGACGCCATCGAGCGCTCCGACGCGGCCGGCGAGTGGGTCAGCCTCGGCTGA

>Haloferax_sp_GUBF-1-01514
ATGTACATCGGAGTGCTCACCGTCCCGCTCGGAGACGAACCCCTCGACGACGCGCTCGACTACCTGTCGG
GCATCGGCGTCGACGGCGTCGAACTCGCCGTCGGCGGCTGGCCCGGCGAGGATCACGTCGACCGGAGCGC
CGTCCTCGCGGACGACGACGCGCAGGCCGACCTCCTCGATTCGGTCGAGAGTCGCGACCTGCAAATCAGC
GCGCTCGCGACGCACAACAACCCGCTGCATCCCATCGAGGAGACGGCCGCCGAGGCGGACACCGAACTCC
GCGAGGCAATCGAACTCGCGGACGCCCTCGACGCGAACACCGTTACCTGTTTCTCGGGGCTCCCCGCCGG
CGGTCCGAACGACGAGGTTCCGAACTGGATTACCGCGCCGTGGCCGACCGAGCACGCCGACGCCCACGAC
TACCAGTGGGAGGTCGCCGTCGACTACTGGTCCGACCTCGCCGCGTTCGCGGACGACCACGGCGTCGACA
TCGCCATCGAGATGCACCCGAACATGCTCGTCTACGAGCCGACGGGGATGCTGAAGCTCCGCGAGGCGAC
CAACGACCGCATCGGCGCGAACTTCGACCCCTCGCACCTCTACTGGCAGGACATCTCCATCACCGACGCG
ATTCGGTTCCTCGGCGAGGCGGACGCCATCCACCACTTCCACGCGAAGGACACGAAGGTCTACGAGTCCG
AGTCGCGCATCAAGGGCGTCCTCGACACGGCCTCCTACGCGGACACCGCCGACCGCTCGTGGCTGTTCCG
CTCTATCGGTTACGGCCACGACGAGGGCCACTGGAAGGACGTGGTCTCGACGCTCCGGATGGTCGGCTAC
GAGGGCGCGCTCTCCATCGAACACGAGGACGCGCTCACGTCGTCCACGGAGGGCCTCGAAAAGGCCGTCG
ACGTGCTCTCGCGCGCCGTCTTCGAGACGCAACCGGGCGACGCCTACTGGGCGGAGTAA

>Haloferax_sp_GUBF-2-03415
ATGACTGACCCGCTCTCTATCGGCGTCCTCGGCTACCGCTTTATGGGCAAGGCGCACTCCAACGCGCTCG
CCCGCCTGCCGATGTTCTTCCCCGACGCGCCCGACGTGGAGCGCTCCGTCATCGTCGGCCGCGACGAGGA
GGCGCTTTCCGACGCCGCCGACCGCTTCGGCTTCGAATCGACCGCAACCGACTGGCGCGACGTGGTCGAC
GACGTGGACGTGTTCTACAACCTCGGCCCGAACCACCTCCACGCCGAACCCTCCATCGCCGCGCTCGAAG
CCGGTGCCAGCGTCTTCTGCGAGAAGCCGCTCGCACCGACGCTCGACGAGGCCGAGGCGATGCGCGACGC
CGCCCGCGCGGCCGACGGCGTCGCCGGCTGCGCGTTCAACTACCGATTCGTGCCTGCCATCCGGTACGCG
AAGAAGCTCATCGAGAACGGCGAACTCGGCGAGATTCGACACGTCCGCGGGCGCTACTTGCAGGATTGGC
TCGTCGATTCCGACGCGCCGTGGACGTGGCGCATGGACGAAGACGCCGCCGGCTCCGGCGCGCTCGGTGA
CCTCGGCGCGCACACCATCGACCTCGTTCGGTTCCTCGTCGGTGACCGCGCCGGCGACATCGACCGCATC
TCGGGGCATCTCCAGACGTTCGTCGACGAGCGACCCGTGCCCGGCGAGGACGAGTACCGGCCCGTCACCG
TCGACGACGCCTACACCGCGCAGGCCGAGTTCGAAAACGGCGCGCTCGGGAGCTTCGAGGCCTCGCGCTT
CGCTGACGGCCACAAGAACGACCACAGCATCGAGATTCACGGCTCCGAGGGAAGCCTGCAGTTCTCGCTC
GAACGCCTCAACGAACTGGAGGTGAAAACCGGCGACGCCCGCGGCTACGAGACGGTACTCGTCACCGACG
AGGACGACCCCTACCTCGACCACTGGTGGCCGCCGGGCCACGTCCTCGGCTGGGAACACACGTTCGTCCA
CGAGAACTACGAGTTCCTGTCGGCGGCCGCCGACGGCGGCGAGTTCTCGCCGTCGTTCGAGGACGGCTAC
GAGGTCCAGTCGATTCTCGACGCCATCGAGCGCTCCGACGCGGCCGGCGAGTGGGTCAGCCTCGGCTGA

>Haloferax_sp_GUBF-2-03416
ATGTACATCGGAGTGCTCACCGTCCCGCTCGGAGACGAACCCCTCGACGACGCGCTCGACTACCTGTCGG
GCATCGGCGTCGACGGCGTCGAACTCGCCGTCGGCGGCTGGCCCGGCGAGGATCACGTCGACCGGAGCGC
CGTCCTCGCGGACGACGACGCGCAGGCCGACCTCCTCGATTCGGTCGAGAGTCGCGACCTGCAAATCAGC
GCGCTCGCGACGCACAACAACCCGCTGCATCCCATCGAGGAGACGGCCGCCGAGGCGGACACCGAACTCC
GCGAGGCAATCGAACTCGCGGACGCCCTCGACGCGAACACCGTTACCTGTTTCTCGGGGCTCCCCGCCGG
CGGTCCGAACGACGAGGTTCCGAACTGGATTACCGCGCCGTGGCCGACCGAGCACGCCGACGCCCACGAC
TACCAGTGGGAGGTCGCCGTCGACTACTGGTCCGACCTCGCCGCGTTCGCGGACGACCACGGCGTCGACA
TCGCCATCGAGATGCACCCGAACATGCTCGTCTACGAGCCGACGGGGATGCTGAAGCTCCGCGAGGCGAC
CAACGACCGCATCGGCGCGAACTTCGACCCCTCGCACCTCTACTGGCAGGACATCTCCATCACCGACGCG
ATTCGGTTCCTCGGCGAGGCGGACGCCATCCACCACTTCCACGCGAAGGACACGAAGGTCTACGAGTCCG
AGTCGCGCATCAAGGGCGTCCTCGACACGGCCTCCTACGCGGACACCGCCGACCGCTCGTGGCTGTTCCG
CTCTATCGGTTACGGCCACGACGAGGGCCACTGGAAGGACGTGGTCTCGACGCTCCGGATGGTCGGCTAC
GAGGGCGCGCTCTCCATCGAACACGAGGACGCGCTCACGTCGTCCACGGAGGGCCTCGAAAAGGCCGTCG
ACGTGCTCTCGCGCGCCGTCTTCGAGACGCAACCGGGCGACGCCTACTGGGCGGAGTAA

>Haloferax_sp_GUBF-3-03407
ATGACTGACCCGCTCTCTATCGGCGTCCTCGGCTACCGCTTTATGGGCAAGGCGCACTCCAACGCGCTCG
CCCGCCTGCCGATGTTCTTCCCCGACGCGCCCGACGTGGAGCGCTCCGTCATCGTCGGCCGCGACGAGGA
GGCGCTTTCCGACGCCGCCGACCGCTTCGGCTTCGAATCGACCGCAACCGACTGGCGCGACGTGGTCGAC
GACGTGGACGTGTTCTACAACCTCGGCCCGAACCACCTCCACGCCGAACCCTCCATCGCCGCGCTCGAAG
CCGGTGCCAGCGTCTTCTGCGAGAAGCCGCTCGCACCGACGCTCGACGAGGCCGAGGCGATGCGCGACGC
CGCCCGCGCGGCCGACGGCGTCGCCGGCTGCGCGTTCAACTACCGATTCGTGCCTGCCATCCGGTACGCG
AAGAAGCTCATCGAGAACGGCGAACTCGGCGAGATTCGACACGTCCGCGGGCGCTACTTGCAGGATTGGC
TCGTCGATTCCGACGCGCCGTGGACGTGGCGCATGGACGAAGACGCCGCCGGCTCCGGCGCGCTCGGTGA
CCTCGGCGCGCACACCATCGACCTCGTTCGGTTCCTCGTCGGTGACCGCGCCGGCGACATCGACCGCATC
TCGGGGCATCTCCAGACGTTCGTCGACGAGCGACCCGTGCCCGGCGAGGACGAGTACCGGCCCGTCACCG
TCGACGACGCCTACACCGCGCAGGCCGAGTTCGAAAACGGCGCGCTCGGGAGCTTCGAGGCCTCGCGCTT
CGCTGACGGCCACAAGAACGACCACAGCATCGAGATTCACGGCTCCGAGGGAAGCCTGCAGTTCTCGCTC
GAACGCCTCAACGAACTGGAGGTGAAAACCGGCGACGCCCGCGGCTACGAGACGGTACTCGTCACCGACG
AGGACGACCCCTACCTCGACCACTGGTGGCCGCCGGGCCACGTCCTCGGCTGGGAACACACGTTCGTCCA
CGAGAACTACGAGTTCCTGTCGGCGGCCGCCGACGGCGGCGAGTTCTCGCCGTCGTTCGAGGACGGCTAC
GAGGTCCAGTCGATTCTCGACGCCATCGAGCGCTCCGACGCGGCCGGCGAGTGGGTCAGCCTCGGCTGA

>Haloferax_sp_GUBF-3-03408
ATGTACATCGGAGTGCTCACCGTCCCGCTCGGAGACGAACCCCTCGACGACGCGCTCGACTACCTGTCGG
GCATCGGCGTCGACGGCGTCGAACTCGCCGTCGGCGGCTGGCCCGGCGAGGATCACGTCGACCGGAGCGC
CGTCCTCGCGGACGACGACGCGCAGGCCGACCTCCTCGATTCGGTCGAGAGTCGCGACCTGCAAATCAGC
GCGCTCGCGACGCACAACAACCCGCTGCATCCCATCGAGGAGACGGCCGCCGAGGCGGACACCGAACTCC
GCGAGGCAATCGAACTCGCGGACGCCCTCGACGCGAACACCGTTACCTGTTTCTCGGGGCTCCCCGCCGG
CGGTCCGAACGACGAGGTTCCGAACTGGATTACCGCGCCGTGGCCGACCGAGCACGCCGACGCCCACGAC
TACCAGTGGGAGGTCGCCGTCGACTACTGGTCCGACCTCGCCGCGTTCGCGGACGACCACGGCGTCGACA
TCGCCATCGAGATGCACCCGAACATGCTCGTCTACGAGCCGACGGGGATGCTGAAGCTCCGCGAGGCGAC
CAACGACCGCATCGGCGCGAACTTCGACCCCTCGCACCTCTACTGGCAGGACATCTCCATCACCGACGCG
ATTCGGTTCCTCGGCGAGGCGGACGCCATCCACCACTTCCACGCGAAGGACACGAAGGTCTACGAGTCCG
AGTCGCGCATCAAGGGCGTCCTCGACACGGCCTCCTACGCGGACACCGCCGACCGCTCGTGGCTGTTCCG
CTCTATCGGTTACGGCCACGACGAGGGCCACTGGAAGGACGTGGTCTCGACGCTCCGGATGGTCGGCTAC
GAGGGCGCGCTCTCCATCGAACACGAGGACGCGCTCACGTCGTCCACGGAGGGCCTCGAAAAGGCCGTCG
ACGTGCTCTCGCGCGCCGTCTTCGAGACGCAACCGGGCGACGCCTACTGGGCGGAGTAA

>Haloferax_mediterranei-01103
ATGACTGAATCCCTCAAAATCGGCGTCCTCGGCTACCGATTCATGGGTAAGGCGCACGCGAACGCCCTCG
CACGCCTGCCGATGTTCTTCCCCGACGCGCCGGACGTAGAGCGCTCCGTCATCGTCGGTCGCGACGAGGA
AGCCCTCGCCGATGCCGCCGACCGCTTCGGCTTCGAGTCGACGGCGACGGACTGGCGCGACGTGGTCGGC
GATGTGGACGTGTTCTACAACCTCGGGCCGAACCATCTCCACGCCGAACCGTCCATCGCGGCCCTCGAAG
CCGGTGCACACGTCTTCTGTGAGAAACCGCTCGCCCCGACGCTCGAAGAAGCCGAAGAGATGCGCGACGC
CGCCCGCGACGCCGACGGCGTGGCCGGATGCGCGTTCAACTACCGGTTCGTCCCGGCGATTCAGTACGCG
AAGGGTCTCATCGAGGACGGCGAACTCGGTGAGATTCACCATGTCCGCGGACGCTACCTACAGGATTGGC
TCGTCGACCCCGAAGCACCGTGGGCGTGGCGCATGGACAAAGACCTCGCCGGGTCCGGCGCGCTCGGCGA
CCTCGGTGCGCACACTATCGACCTCGTGCGCTTCCTCGTCGGGGATTCGGATGTCGCGGGCGACATTACA
CGCGTCTCCGGCCACCTCCAGACGTTCGTCGACGAGCGACCGGTGCCCGGAACGGACGAGTACAAACCCG
TCACGGTCGACGACGCCTACACGGCACAGGCCGAGTTCGAAAACGGCGCAGTCGGCTCGTTCGAAGCCTC
TCGATTCGCCGACGGCCACAAGAACGACCACACCATCGAGATTCACGGCTCCGAGGGGAGTCTGACGTTC
TCGCTCGAACGCCTCAACGAACTGGAGGTAAAGACGGGCGACGCCCGCGGCTACGAGACCGTGCTCGTCA
CCGACGAGTCGGACCCCTACGTAGGAAACTGGTGGCCACCGGGCCACGTCATCGGCTGGGAACACACCTT
CGTCCACGAGAACTACGAGTTCCTCACCGCCGTCGCAGAGCGGGCCGCTGCGGGCAGCCGGACGCAGTCC
GGCGAGGCGGCCGAAGGTGGCGAGTTCCACCCATCGTTCGAGGACGCCTACGAGGTCCAAGAAGTGCTCG
ACGCCATCGAGCGGTCCGACGAGACCGGCGAGTGGGTCAGCCTCGAATAG

>Haloferax_mediterranei-01104
ATGTACATCGGTGTGCTCACTGTCCCACTCGGAAACGAATCTCTCGCCGACGCGCTCGACTATCTGTCGG
GTATCGGCGTCGAAGGCGTCGAACTCGGCGTCGGCGGATGGCCCGGCGAAGACCACGTCGACCGAGCGGC
CGTCCTCGGTGACGACGAGAGACAGGCTGCCCTGCTCGCCGCCGTCGAGGAGCGCGAGATGCAAATCAGC
GCGCTAGCGACTCACAACAACCCGCTGCATCCCGACGAAGAAACAGCCGCCGAGGCGGACGAAGAACTCC
GCGAGGCAATCGAACTCGCCAGTGTCCTCGACGTAAACACCGTCACGTGTTTCTCCGGCCTCCCGGCAGG
CGGCCCGAACGACGAAGTGCCGAACTGGATTACGGCCCCGTGGCCGACCGAGCACGCCGACGCCCACGAG
TACCAGTGGGACGTCGCCATCGACTACTGGTCCGACCTCGCCGAATTCGCCGACGACCACGGCGTCGACA
TGGCCATCGAGATGCACCCGAACATGCTCGTCTACGAACCGACGGGCATGATGCGTCTGCGCGAGGCGAC
CAACGAACGCATCGGTGCGAACTTCGACCCTTCGCACCTCTATTGGCAGGATATCGACGTAACCGAAGCG
ATTCGCTTCCTCGGCGACCACGACGCTATCCACCACTTCCACGCGAAGGACACGAAAGTGTACGACCACC
ACGCGAAGGTCAAGGGTGTCCTCGACACCACCTCCTACACCGACACCGCCGCCCGCTCGTGGCTCTTCCG
CTCGATTGGCTACGGCCACGACGAAGGCCACTGGAAGGACGTGGTCTCGACGCTTCGAATGGTCGGCTAC
GAGGGCGCGCTCTCTATCGAACACGAAGACGCGCTCACCTCCTCGAACGAGGGACTGGAGAAGGCCGTCG
ACGTGCTCTCGCGCGCCGTCTTCGAAACGCAACCCGGCGAGGCCTACTGGGCGGAGTGA

>Natronorubrum_tibetense-01046
ATGGACATCGGTGTACACACGCCACCGCTGGCGGACGAATCGCTCGAGGGTGCACTCGCGTACCTCTCCG
AGATCGGCGTCGACGCGATCGAACCGGGCGTCGGGGGTTATCCCGGCGACGACCACCTCGTTCGACGGGA
GTACCTAGACGACGAGGACGCACAGGCCGAGTTGGCGGAGCTGCTCGAGACCTACGGGATGCGGATCAGC
GCGCTCGCGACGCACAACAATCCGCTGCATCCGGACGACGAGCAGGCAGCCGCGGCGGACACCGAACTCC
GCGAGGCGATTCGGCTCGCCGACCAGTTGGGTGTGAACACGGTCACTTGCTTCTCCGGGCTGCCGGCCGG
CGGTCCCGAGGACGAGGTTCCGAACTGGATCACGGCTCCGTGGCCCTCGGAACACGCCGACGCCCACGAG
TACCAGTGGGATGTCGCCCTCGAGTACTGGTCGGACCTCGCCGCACACGCAGACGAGCACGGTATCGACC
TCGCCATCGAGATGCACCCGAACATGCTGGTCTACGAACCCCACGGGATGGCTCGCCTGCGCGAGGAGAC
GAACGACCGGGTCGGCGCGAACTTCGACCCCTCGCATCTCTACTGGCAAGGAATCACGATCAGCGACGCG
ATCCGATACCTCGGCGAGCGCGACGCGATCCATCACGTCCACGCGAAGGACACTCGAGTGTACGAAGAAC
AGGCCCGCGAGAAGGGTGTTCTCGACACGACGGCGTACGACGATGAGTCGAATCGGTCGTGGCTCTTCCG
CTCGGTCGGCTACGGCCACGACGAATCCCACTGGAAGGAGATCGTCTCGACGCTCCGGATGGTCGGCTAC
GACGGCGCGCTGAGCATCGAACACGAGGACTCGCTGACGAGTTCGCGCGAGGGTCTCGAGAAAGCCGTCG
ATCTGCTCGAGCGAGCAGTGTTCCGCGAGCAACCCGGGGACGCGTACTGGGCCGAGTAA

>Natronorubrum_tibetense-01047
ATGTCACTCGAAGTCGGGGTTCTTGGCTATCGGTTCATGGGCAAAGCACACGCGAACGCGATGGCGCGGC
TGCCGATGTTCTTCCCGGACGCACCGGAGATCGAGCGCAGCGTCCTCGTCGGCCGCGACGAGGCGGCGTT
AACCGACGCGGCGGATCGACTCGGCTTCGACTCGATCGCGACGGACTGGACCGAGGTCGTCGACGACGTC
GACGCCTTCTACAACCTCGGACCGAACCACGTCCACGCCGAGCCCTCGATCGCGGCGCTCGAGGCCGGCA
CGCCGGTCTTCTGTGAGAAACCGCTCGCGCCGACGCTCGAGGACGCCGAAACGATGGCCGAAGCGGCCCG
AGACGCCGGGAGCGACGTGCCCGCCGGTTGTGCGTTCAACTATCGGTTCGTCCCCGCGATTCGGTACGCG
AAACGGCTGCTCGAGGCGGGCGAACTGGGCGAGATACACCACGTCCGCGGACGGTACCTGCAGGACTGGC
TGGTCGACCCCGAGGCCCCGTGGTCGTGGCGCAACGACGAGGAACTGGCTGGCTCGGGCGCGCTCGGCGA
CCTCGGCGCGCACACGGTCGATCTGCTCCGATTCCTGGTCGGCGACGACGACCTCGCCGGCGAGATGGTC
GGCGTCAGCGGCCACCTGCAGACGTTCGTCGACGAGCGGCCGGTTCCGGATTCGGACGAGTCGCGACCCG
TCACCGTCGACGACGCCTACTCCGCGCAGGTCGAGTTCGAAAACGGTGCGATGGGGACGCTCGAGGCCTC
GCGCTTTGCTACCGGCCACAAAAACGACCACACTGTCGAAATCCACGGCTCAGAGGGCAGCCTCCGGTTC
TCTCTCGAGCGACTGAACGAGCTCGAGGTCCTCCGGACGGACGAGAACCGCGGCTACGAGACGATTCTGG
TCACCGACGCGGACGACCCCTACGTCGACCACTGGTGGCCGCCGGGCCACGTGCTGGGCTGGGAGCACAC
CTTCGTCCACGAGAACTACGAGTTCCTGAGCGCAGTCGAGAGCGGTGGCGAGTTCGAGCCGAGCTTCGAG
GACGGCCTCGCTGCCCAGCACGTGCTCGCAGCCATCGAGGAGAGCGACGAGAATCGGGAGTGGGTCTCGC
TCGAGTAG

 ####
 GenomicGroupingSegments.fasta
 
 >Halobiforma_nitratireducens-1
CTACTCGAGGGCGACCCACTCGCCGCGGTCGTCGCTGTCCTGGATCGCGGCGAGGAGCCGCTGGACGGCG
AGGCCGTCCTCGAAACTCGGTTCGAACGCTGTCCCCTCGGACACGGCCGAGAGGAACTCGTAGTTCTCGT
GGACGAACGTATGCTCCCACCCCAGGACGTGACCCGGCGGCCACCAGTGATCCACGTAGGGATCGTCCGC
GTCGGTCACCAGAATCGTCTCGTAGCCACGGTCGCCCTCACGATGGATCTCGAGTTCGTTCAGCCGCTCG
AGCGAGAACCGGAGGCTGCCCTTCGAGCCGTGAATCTCGATCGTATGGTCGTTCTTGTGGCCCGTGGCGT
ACCGCGAGGCCTCGAGCGTACCGATCGCGCCGTTTGCGAACTCGAGTTGGGCGGCGTAGGCGTCGTCGAC
GGTGACGGGGCGGGTTTCGACGGCATCGCCATCCCCACCGGACTCCCCCGGCGTCTCCTCGCTCCCTTCG
ACGGGCCGTTCGTCGACGAACGTCTGTAAGTGACCACTGAGCCGTTCGATGTCACCCGCGAGGTCGTCGT
CGCCCACGAGAAACCGGACCAGGTCGACCGTATGTGCGCCCAGGTCGCCGAGCACGCCCGATCCGGCCAA
CTCCTCGTCGAGCCGCCACGACCACGGTGCGTCGGGATCGACCAGCCAGTCCTGCAGGTAGCGACCGCGG
ACGTGGCGGATCTCGCCGAGTTCGCCGTCCTCGAGCAGCCCCTTCGCGTACTGGATCGCGGGGACGAACC
GGTAGTTGAAGGCCGTGCCCGCGGGCACGTCGTCGCCGGCTTCGCGGGCCGCCTCTGCCATCCGCTCGGC
GTCTGCGAGAGTAGGCGCGAGCGGCTTCTCACAGAAGACGGGGGTGCCCGCCTCGAGCGCGGCGATCGAC
GGTTCGGGGTGGACGTGGTTCGGACCGAGGTTGTAGAAGACGTCGATGTCGTCGACGACGGCTTCCCAGT
CGGTCGCGGTCGATTCGAAGCCGAACCGGTCGGCGGCGTCGGCGAGGGCGTCCTCGTCGCGGCCGACCAG
TACGGTGCGTTCGATCTCCGGCGCGTCCGGGAAGAACATCGGCAGCCGTGCCATCGCGTTCGCGTGTGCC
TTGCCCATGAATCGATACCCCAGCACGCCGACCTCGAGTGTGTCAGTCATACGTTGTCGGTTACGAGTGG
CGTCGGTAGTAGTTGTCTTCGCTGTGCTTGCGAGGGGTCGTTACTCCGCCCAGTAGGCGTCGCCGGGTTG
AGTCCGGAAGACGGCCCGCCCGAGCAGTTCGACGGCCTTCTCGAGACCTTCTCGGCCGCTGGTCAGGGAG
TCCTCGTGTTCGATACTCAAGGTGCCGTCGTAGCCGACCATCCGCAGCGTCGAGACGAGGTCTTTCCAGT
GGGACTCGTCGTGGCCGTAGCCGACAGAGCGGAACAGCCACGAGCGGTTGAGTTCGTCGTCGTAGGCGGT
CGTATCGAGGACGCCCTTCTCGCGGGCCTGTTCCTCGTAGACTTTCGTGTCCTTGGCGTGGAAGTGGTGG
ATGGCGTCGCGCTCGCCGAGAAAACGGATCGCGTCGGTGATCGAGACTCCCTGCCAGTACAGATGCGAGG
GATCGAAGTTCGTGCCGACGCGGTCGTTCGTCTCTTGGCGGAGCCGTGCCATCCCGTGGGGCTCGTAGAC
GAGCATGTTGGGGTGCATCTCGATGGCGAGATCGACCTCGTGGTCGTCGGCGAACGCCGCCAGGTCCGAC
CAGTAGTCGACGGCCACGTCCCACTGGTACTCGTGGGCCTCGGCGTGTTCCGGTGGCCAGGGCGCGGTGA
TCCAGTTGGGAACCTCGTCGTCCGGACTGCCCGCAGGCAGGCCGGAGAAACAGGTAACGACGCCGACGTC
GATCTGGTCGGCCAGGCGGATCGCCTCCCGCAGTTCCGTGTCGGCCTCCTCGGCCCGCTCCTCGTCGGGA
TGCAGGGGGTTGTTGTGCGTCGCGAGCGCACTGATGTGTATCCCGTGCTCGTCGAGGACCGCCTCGAGTT
CGGCCTGGGCGTCCTCGTCGTCCAGGTACTCCCGCCGAGGAAGGTGGTCCTCGCCGGGGTGGCCCCCGAC
ACCGGGTTCGATCGCGTCGACCCCGATGTCCGCGAGGTACGCGAGCGCACCCTCGAGCGATTCGTCGGCC
AGCGGCGGCGTGTGGACACCGATATCCAT

>Halococcus_saccharolyticus-1
TCATGCTTCGACCGCCGCCCACTCGCCGCGGTCGTCGCTGCGCTCGATGGCGTCGAGGACGCGCTGTACC
GCAAGACCGTCGGCGAACGAGGGGTGGAACGCTTCTTCCTGATCGATTGCCGACAGGAACTCGTAGTCCT
CGTGAACGAAGGTGTGCTCCCAGCCGAGGACGTGGCCCGGCGGCCACCAGTGATCGACGTAGGGGTCGTC
GGCGTCGGTCACGAGCATCGTCTCGTAACCCCGGTTGCCGTCGCGGAGCAGTTCGAGTTCGTTGAGACGT
TCGAGCGAGAACCGGAGGCTGCCCTCGGTGCCGTGAACCGCGATCGTGTGGTGGTTCTTGTGGCCGTCGG
CGACCCGCGAGGCCTCGAAGGTGCCCATCGCGCCGTTCGCGAATTCGGCCTGGGCGGAGTAGGCGTCGTC
GACGGTCACCGCGCGCGCGTCCTCGCTCTCCTCGCCTTCCACTGGTCGCTCGTCGACGAACGTCCGGAGG
TGGCCGCTGATGCGCTCGATTTCGCCCGCGCGGTCACCGATGAGGAATCGTGCGAGGTCGATCGTGTGTG
CGCCAAGGTCGCCGAGCGCACCGCTGCCGGCAAGGTCCTCGTCCATCCGCCAAGACCACGGCTCTTCGTG
GTCGACGCCCCAATCCTGGAGATACTTCCCGCGGACCTGGCGGATCGCGCCGATCTCGCCGTCGTCGACC
AGGTTTTTCGCGTACTGGATCGCAGGTACGAAGCGGTAGTTGAACGCACACCCGGCGATCGCGTCGCTCG
CGTCGGCCGCCGCAGCCATCCGCTCGGCGTCATCGAGGGTCGGTGCGAGCGGTTTCTCGCAGAAGACGGG
GACATCGGCTTCGAGTGCGGCGATCGAGGGTTCGGGATGGACGAAGTTCGGCCCGAGGTTGTAGAAGACG
TCCACCTCGTCGATTACAGACTCCCAGTCGGTCGCGGTGTTGGAAAAGTCCAGCTGGTCCGCAGCGTCCG
CGAGTGCGTCCTCGTCGCGGCCAATGAGGGTGTGACGCTCGATGTCGGGCGCGTCGGGGAAGAACATCGG
GAGTCGCGTGAACGCGTTCGAATGAGCCTTGCCCATGAATCGATAGCCGAGAACGCCGATTCGCAATGCC
ATGTCGGCACCCACACCCGATGTCGCCTTAGTTCTCCGGGTTGGAGCGGGTGTGGCCGAGGGCTCCGCGT
CGGAATCGCGTCGGGTTCGACTACTCCGCCCAGTAGGCGTCGCCAGGCGTCGTCTCGAACACCGCCCTGT
CGAGCACGTCGACCGCCTTCTCCAGCCCCTCGCGCGAACTCGTGAGCGAGTCCTCGTGTTCGATCGAGAG
CGCGCCGTCGTAGCCCACCATCCGCAGGGTGGAGACGACCTCTTTCCAGTGGGATTCGCCGTGACCGTAG
CCGACGGTTCGGAAGAGCCACGAGCGGTCTTCCTCCTCGGTGTACGGCGTCGTGTCGAGGTGACCCTTGA
CCCGCGCATTCGACTCGTAGAGACCGGTGTCCTTCGCGTGGGCGTGGTGGATCGCGTCGCCGAGGTACCG
GATCGCCGCAGGAACGTCGATTCCCTGCCAGTAGAGATGCGAGGGATCGAAGTTCGCGCCGATCCGGTCG
TTGGTGGCTTCGCGCAGCCGCTCCATTCCTGTCGGCTCGTACACCAACATGTTGGGGTGCATCTCGATCC
CGACGTTCACGCCGTGGTCGTCGGCGAAGTCGGCGAGGTCGGTCCAGTACTCCTCGGCGACCCCCCACTG
GTAGTCGTGAGCCTCCTTGTGCTCGGTGGGCCACGGCGCGGTGATCCAGTTCGGCACCTCGTCGTTCGGG
CCGCCGCCGGGCAGTCCCGAGAACGTGGTGACGGTATCCACGCCGAGCTGAGCCGCCAGTTCGATCGCCT
CCCGAAGTTCCTCGTCCGCCGTCTCGGCCTGATCGTCGTCGGGATGGATCGGGTTGTTGTGGGTCGCGAG
CGCCGAAATTCGGAGGTCGTGCTCGTCGAGCAGATCGTGGAGGTCGGCCTGGGCGTCCTCGTCGTCGAGA
TACTCCTCGCGCGCGAGGTGGTCGTTGCCGGGACTCCCGCCACAGCCGAGTTCGACCGTGTCGACCCCGA
GGCCAGCGAGGTACTCGCAGGTCTCGTCGAGCGGCTGGTCGCCGAACGGCACGGTAAGTACGCCGATGTC
CAT

>Halococcus_thailandensis-1
ATGGACGTTGGCGTGCTCACCGTACCCCTCGGCGACCAGCCGCTCGACGAAACGCTCGCCTATCTCGGCG
ATCTCGACGTCGACACCGTCGAACTGGGCTGTGGCGGCAACCCCGGCGACGACCATCTCGTGCGCGAGGA
GTATCTCGACGACGAGGCGGCCCAGGACGAGTTGCAGGAACGACTCGACGAGCACGATCTCCGGGTGAGC
GCGCTCGCGACGCACAACAACCCGCTCCATCCCGACGACGAGCGCGCCGCCGCGGCCGACACCGAACTCC
GAGAGGCGATCGAACTCGCCGCCCAGCTGGGCGTCGACACCGTCACGACCTTCTCGGGGCTGCCCGCCGG
TGGACCGAACGACGAGGTGCCCAACTGGATCACCGCCCCGTGGCCGGCCGAGCACAAGGAGGCCCACGAT
TACCAGTGGGAGGTCGCCGAGGACTACTGGACGGAACTCGCCGCATTCGCCGACGAGCAGGGAGTCGACA
TCGCCATCGAGATGCATCCGAACATGCTCGTCTACGAGCCGACGGGGATGGAGCGACTGCGCGAGGCCAC
CAACGAGCGCATCGGTGCGAACTTCGACCCCTCGCATCTCTACTGGCAGGGCATCGACGTGCCGCGCGCG
ATCCGCTATCTCGGCGAGGCGATCCACCACGTTCACGCGAAAGATACCGGACTCTACGAGGCCAACGCCG
ACGTCAAGGGCTATCTCGACACGACACCCTACACCGAGGAGGCGGAGCGCTCGTGGCTGTTCAGAACCGT
GGGCTACGGCCACGGCGAATCCCACTGGAAGGAGGTCGTCTCGACGCTCAGAATGGTCGGCTACGACGGC
GCGCTCTCGATCGAACACGAGGACTCGCTGACGAGTTCGCGCGAGGGCCTGGAGAAGGCCGTCGACGTAC
TCTCGCGGGCGGTGTTCGCGACCACGCCCGGCGACGCCTACTGGGCGGAGTAGTCCATAGTTGATGATGC
TTTAGACACGCCACAGCCGTGATGGTTCTGTGGTCGTCGTTTCACGACTAGGGCCAACCTATCCTGCCAG
TGTCGCGTGCTCCTCATGAGGGCAAGCGGTTGCCTTTGGTCCCGACAGGGACCGTGAGGTACCGTGATAT
GGATGCGAACACTAGAACTGCTGGAAGATGAGGTTGCGCTAATTTTGCATCCTTTAGATGTGGTCATGAC
TCTGCTTGCGCTCGAACTCGTGTACGGCGTATAATTAGGGGCGTATCCTATTAGTGAGAATTCATCCGAT
GTACTGGGTTAGCATCCGTGAATTCGATCGTATCCGGAGAGGGGGACGGTTCTAACACTATTTCACTTCG
TCTCTAGCCTAGAGGTTTATATCTCTGGAAGTATTTGGCTACTCTAGAGTTATGAGAAAAACTCTAGAAA
TCTCAGATGAGACCTTCGACACACTCAATGAACTTGGAGGTACATTCGATACCCTTGATGAAGTACTTCA
AAAACTAATTCGCGATGCAGGGCACGAAGAATTACTCGACAAAGACAATGACGAAGAAGGAGATAACGGA
AACTCCAACACCATGAGTGCACATGATCGCAAGGAGAGGTTCATCAAATCTCTCAAAGAAGACGAGCAAG
TACTAAACGTAGAGAAAATCAAGCGCAGCGCCTGGAAAGTCAAAACTCGCAAGGGGAAAAAGATAGTTTG
GATCCACTATCATTGTGATTTTGAATTCTTCGGAGGTTCCTGGGAAGTCAATCATAATCTTGAGGATCGG
GGTGATCTGATTCATCTTTTCCTTGGACCTCAATCAGAAGACTACTATGTAGTCCCAGACAGCGATCTCC
ACTCGGGGAAATTTGTGGTATATGATACAAAGGATGGGGGTAACTGGAAATTCAGCACCAAACGTGGTGA
GCCGAAAAATTTGGAAGCGCTAGAATCTGAATATTCTAGTCTGGGTCTGATTACCAACTAATATTATGAT
CCTTGTGGCGATCGGAGGGTGCGGTTACGCATGAAGCCGCTGGGAGACGATATTGTGACTACGATTCGCT
CCAAGTATAGACTGTGACGTTCATCCGATGAGGACACTGAGCGCACGATGGTGCGACTTTTGGACCTCAT
ACACGGTGCCACTCATCAACATACAAATTTATAGAACAATAATCAACCTAAATATACTTTATTATAAATA
ATATATAAAATAAAATTATTTTTATAGTTTGTCGAGATGAGGGATGGAGACGCATATGAAAGCATCATAG
TTGTTGTCCGTCACTCGCTGACTGGCGCTGAACACTTACCCCGAAACCTAAGACGCCCTCGACTGTACGC
CCAATATGGCACTAAAGATCGGCGTGCTCGGCTATCGGTTTATGGGCAGGGCCCACTCGAACGCCTTCGC
GCGCCTCCCGATGTTCTTCGACGACGCGCCGGCCATCGAGCGCCACACGCTCGTCGGGCGCGACGAGGAC
GCGCTGGCGGCTGCCGCGGATCGGTTCGGCTTCGCCAACACGGAGACCGATCGGGAGGCCGCCATCGACG
AGGTGGACGTCTTCTACAACCTCGGGCCGAACCATCTCCATCCCGAGCCGTCGATCGCGGCGCTCGACGC
CGACGTGCCCGTGTTCTGCGAGAAACCGCTCGCGCCCACGGTGGCAGACGCAGAGCGGATGGCCGAGGCG
GCTGCCGAGAGCGACGCGATCGCCGGCTGTGCGTTCAACTACCGGTTCGTGCCGGCCATCCAGTACGCGA
AGAACCTGATCGACGCGGGCGAGCTCGGCGAGATCCGCCACGTGCGCGGGCGGTATCTCCAGGACTGGGG
GGCCGACCCCGAGGACCCGTGGACGTGGCGCATGGACGAAGAACTCGCGGGCAGCGGCGCACTCGGTGAT
CTGGGCGCGCACACGATCGATCTCGCGCGCTTTCTGGTCGGCGAGCAAGCTGGCGACATCGAGCACGTCA
GCGGCCACCTGGAGACGTTCATCGAGGAGCGACCCGTGGAAGGAGGCGACGAGAGCCGGCCCGTGACTGT
CGACGACGCCTACTCGGCACAGGCCGAATTCGCGGGTGGGGTGATGGGCACCTTCGAGGCCTCGCGGATG
GCGAGCGGCCACAAGAACGATCACACCATCGCGATCCACGGCTCGGAAGGCAGTCTGAAGTTCTCGCTCG
AACGGCTGAACGAACTGGAGTTGCTCCGGGAGGGCGACAGGGGCTACGAGACCGTTCTGGTGACCGACGA
GACCGACCCCTACGTCGAGCACTGGTGGCCGCCGGGACACGTCCTCGGCTGGGAGCACACGTTCGTCCAC
GAGGACTACGAGTTTCTCTCGGCGGTCGCCGAGGGCGAACCCTACGAACCGTCGTTCGCGACGGCCTGCG
AGGTCCAGCGCGTGCTCGGGGCCATCGAGCGTAGCGACGAGCGCGGCGAGTGGGTCGAGGTCGAATAA

>Haloferax_alexandrinus-1
TCAGCCGAGGCTGACCCACTCGCCGGCCGCGTCGGAGCGCTCGATGGCGTCGAGAATCGACTGGACCTCG
TAGCCGTCCTCGAACGACGGCGAGAAGTCGCCGCCGCCGGCGACCGCCGACAGGAACTCGTAGTTCTCGT
GGACGAACGTGTGTTCCCAGCCGAGGACGTGGCCCGGCGGCCACCAGTGGTCGAGGTAGGGGTCGTCCTC
GTCGGTGACGAGCACCGTCTCGTAGCCGCGGGCGTCGCCGGTTTTCACCTCCAGTTCGTTGAGGCGTTCG
AGCGAGAACTGAAGGCTGCCCTCGGAGCCGTGAATCTCGATGGTGTGGTCGTTCTTGTGGCCGTCTGCGA
AGCGCGAGGCCTCGAAGCTCCCGACCGCGCCGTTTTCGAACTCGGCCTGCGCGGTGTAGGCGTCGTCGAC
GGTCACGGGCCGGTACTCGTCCTCGCCGGGGACGGGCCGCTCGTCGACGAACGTCTGGAGATGCCCCGAG
ATGCGGTCGATGTCGCCGGCGCGGTCACCGACGAGGAACCGAACGAGGTCGATGGTGTGCGCGCCGAGGT
CACCGAGCGCGCCGGAGCCGGCGGCGTCTTCGTCCATGCGCCACGTCCACGGCGCGTCGGCGTCGACGAG
CCAATCCTGCAAGTAGCGCCCGCGAACGTGTCGAATCTCGCCGAGTTCGCCGCTCTCGATGAGTCGCTTG
GCGTACCGGATGGCGGGCACGAAGCGGTAGTTGAACGCACAGCCGGCGACGCCGTCGGCCGCGCGGGCGG
CGTCGCGCATCGCCTCGGCCTCGTCGAGCGTCGGCGCGAGCGGCTTCTCGCAGAAGACGCTGGCACCGGC
TTCGAGCGCGGCGATGGAGGGTTCGGCGTGGAGGTGGTTCGGGCCGAGGTTGTAGAACACGTCCACGTCG
TCGACCACGTCGCGCCAGTCGGTCGCGGTCGATTCGAAGCCGAAGCGCTCCGCCGCGTCGGAAAGCGCCT
CCTCGTCGCGGCCGACGATGACGGAGCGCTCCACGTCGGGCGCGTCGGGGAAGAACATCGGCAGGCGGGC
GAGCGCGTTGGAGTGCGCCTTCCCCATGAATCGGTAGCCGAGGACGCCGATAGAGAGTGGGTCAGTCATT
GGATTACTCCGCCCAGTAGGCGTCGCCGGGTTGCGTTTCGAAGACGGCGCGCGAGAGCACGTCGACGGCC
TTTTCGAGTCCCTCCGTGGACGACGTGAGCGCGTCCTCGTGTTCGATGGAGAGCGCGCCCTCGTAGCCGA
CCATCCGGAGCGTCGACACCACGTCCTTCCAGTGGCCCTCGTCGTGACCGTAGCCGATAGACCGGAACAG
CCACGAGCGGTCGGCGGTGTCCGCGTAGGAGGTCGTGTCGAGGACGCCCTTGATGCGCGACTCGGACTCG
TACACCTTCGTGTCCTTCGCGTGGAAGTGGTGGATGGCGTCCGCCTCGCCGAGGAACCGAATCGCGTCGG
TGATGGAGATGTCCTGCCAGTAGAGGTGCGAGGGGTCGAAGTTCGCGCCGATGCGCTCGTTGGTCGCCTC
GCGGAGCTTCAGCATCCCCGTCGGCTCGTAGACGAGCATGTTCGGGTGCATCTCGATGGCGATGTCGACG
CCGTGGTCGTCCGCGAACGCGGCGAGGTCGGACCAGTAGTCGACGGCGACCTCCCACTGGTAGTCGTGGG
CGTCGGCGTGCTCGGTCGGCCACGGCGCGGTAATCCAGTTCGGCACCTCGTCGTTCGGGCCGCCGGCGGG
GAGTCCCGAGAAACAGGTGACGGTGTTCGCGTCGAGGGCGTCCGCGAGTTCGATTGCCTCGCGGAGTTCG
GTGTCGGCCTCGGCGGCCGTCTCCTCGACGGGATGCAGCGGGTTGTTGTGCGTCGCGAGCGCGCTGATTT
GCAGGTCCCGACTTTCGACCGAATCGAGGAGGTCGGCCTGCGCGTCGTCGTCCGCGAGGACGGCGCTCCG
GTCGACGTGGTCCTCGCCGGGCCAGCCGCCGACGGCGAGTTCGACGCCGTCGACGCCGATGCCCGACAGA
TAGTCGAGCGCGTCGTCGAGGGGTTCGTCTCCGAGCGGGACGGTGAGCACTCCGATGTACAT

>Haloferax_denitrificans-1
ATGTACATCGGAGTGCTCACCGTCCCACTCGGAGACGAACCCCTCGACGACGCGCTCGACTATCTGTCGG
GTATCGGCGTCGACGGCGTCGAACTCGGCGTCGGCGGCTGGCCCGGCGAGGACCACGTCGACCGAAGCGC
CCTCGTCGCGGACGAAGAGGCGCAGGCCGCCCTCCTCGATTCGGTCGAGAGCCGAGACCTGCAAATCAGC
GCGCTCGCCACGCACAACAACCCGCTCCACCCCGACGAGGAGACGGCCGCCGAGGCCGACACCGAACTCC
GCGAGGCAATCGAACTCGCGGACGCCCTCGACGTGAACACCGTCACCTGTTTCTCGGGGCTCCCCGCCGG
CGGCCCGAACGACGAGGTGCCGAACTGGATTACCGCGCCGTGGCCGACCGAGCACGCCGACGCCCACGAC
TACCAGTGGGAGGTCGCCGTCGACTACTGGTCCGACCTCGCCGCGTTCGCCGACGACCACGGCGTCGACA
TCGCCATCGAGATGCACCCAAACATGCTCGTCTACGAGCCGACCGGGATGCTGAAGCTCCGCGAGGCGAC
CAACGAGCGCGTCGGCGCGAACTTCGACCCCTCGCACCTCTACTGGCAGGACATCTCCATCACCGACGCG
ATTCGGTTCCTCGGCGAGGAAGACGCCATCCACCACTTCCACGCGAAGGACACGAAGGTCTACGAGTCCG
AGTCGCGCATCAAGGGCGTCCTCGACACGACCTCCTACGCGGACACCGCCGACCGCTCGTGGCTGTTCCG
CTCTATCGGCTACGGCCACGACGAGGGCCACTGGAAGGACGTGGTGTCGACGCTCCGGATGGTCGGCTAC
GAGGGCGCGCTCTCCATCGAACACGAGGACGCGCTCACGTCGTCCAAGGAGGGCCTCGAAAAGGCCGTCG
ACGTGCTCTCGCGCGCCGTCTTCGAGACGCAACCCGGCGACGCCTACTGGGCGGAGTAATCCATGACTGA
CTCACTCAAAATCGGCGTCCTCGGCTACCGCTTCAGGCCCACCTTTTTCCGGTTCGGGGCCGCTTCGCGA
CCCGCTCACCGCAAAAATCTGGGCCAAAAACTGCCGCGAGACTCGGCCGCCGGCCTCGCTCGCGGTACTG
CACTGGTCACGGAGGCGGCACAATGACTGAACCACTCACCGTCGGCGTCCTCGGTTACCGATTCATGGGG
AAGGCGCACTCCAACGCGCTCGCCCGCCTGCCGATGTTCTTCCCGGACGCGCCCGACGTGGAGCGCTCGG
TCATCGTCGGCCGCGACGAGGAGGCGCTTTCCGACGCCGCAGACCGCTTCGGCTTCGAATCGACGGCGAC
CGACTGGCGCGACGTGGTCGACGACGTGGACGTGTTCTACAACCTCGGGCCGAACCACCTCCACGCCGAG
CCCTCTATCGCCGCGCTCGAAGCCGGTGCCAGCGTCTTCTGCGAGAAGCCGCTCGCGCCGACGCTCGACG
AGGCCGAGGCGATGCGCGACGCCGCCCGCGCGGCCGACGGCGTCGCCGGCTGTGCGTTCAACTACCGGTT
CGTGCCCGCAATCCGGTACGCGAAGCGACTCATCGAGGACGGCGAACTCGGCGAGATTCGACACGTCCGC
GGGCGCTACTTACAGGACTGGCTCGTCGACGCCGACGCGCCGTGGACGTGGCGCATGGACGAAGACGCCG
CCGGCTCCGGCGCGCTCGGCGACCTCGGCGCGCACACGGTCGACCTCGTTCGGTTCCTCGTCGGCGACCG
CGCCGGCGACATCGACCGCATCTCGGGCCACCTCCAGACGTTCGTCGACGAGCGACCCGTGCCCGGCACG
GACGAGTACAGGCCCGTGACCGTCGACGACGCCTACACCGCGCAGGCCGAGTTCGAAAACGGCGCGGTCG
GGAGCTTCGAGGCCTCGCGCTTCGCCGACGGCCACAAGAACGACCACAGCATCGAGATTCACGGCTCCGA
GGGAAGCCTGCAGTTCTCGCTCGAACGCCTCAACGAACTGGAGGTGAAAACCGGCGACGCCCGCGGCTAC
GAGACGGTTCTCGTCACCGACGAGACGGACCCCTACCTCGACCACTGGTGGCCGCCGGGCCACGTCCTCG
GCTGGGAACACACGTTCGTCCACGAGAACTACGAGTTCCTGTCGGCGGTCGCCGACGGCGGCGACTTTTC
GCCGTCGTTCGAGGACGGCTACGAGGTGCAGGCGGTTCTCGACGCCATCGAGCGCTCCGACGAGGCCGGC
GGGTGGGTCAGCCTCGGCTGA

>Haloferax_elongans-1
ATGTACATCGGAGTGCTCACTGTCCCGCTCGGGAACGAATCCCTCGACGACGCGCTCGACTACCTGTCGA
GTATCGGCGTCGAAGGTGTCGAACTCGGTGTCGGTGGCTGGCCCGGCGAAGACCACGTCGACCGCACAGC
AGTCCTCGGTGACGAAGACGCGCAGGCCGACCTGCTCGCGGCCGTCGAAGACCGAGACATGCAGATTAGC
GCGCTGGCGACCCACAACAACCCGCTTCACCCGGACGAAGAGACGGCGGCCGAAGCGGACACGGAACTCC
GCGAGGCTATCGAACTCGCCGACGCGCTCGACGTGAACACCGTCACCTGTTTCTCCGGCCTGCCCGCGGG
CGGCCCGAACGACGAAGTCCCGAACTGGATTACGGCCCCGTGGCCGACCGAGCACGCCGACGCCCACGAG
TACCAGTGGGACGTCGCCGTCGACTACTGGTCCGACCTCGCCGAGTTCGCAGACGACCACGGCGTCGACA
TGGCTATCGAGATGCACCCCAACATGCTCGTCTACGAACCGACGGGGATGCTGAAGCTCCGCGAGGCGAC
AAACGAGCGCATCGGCGCGAACTTCGACCCCTCGCACCTCTACTGGCAGGACATCTCGATTACCGACGCG
ATTCGCTTCCTCGGCGAACACGACGCCATTCACCACTTCCACGCGAAGGACACGAAGGTCTACGAGTCCG
AATCGCGCGTCAAGGGCGTCCTCGACACCACCTCCTACGCCGACACCGCCGACCGCTCGTGGCTCTTCCG
GTCTATCGGCTACGGCCACGGCGAAGAACACTGGAAAGACGTCGTTTCGACGCTCCGGATGGTCGGCTAC
GAGGGCGCGCTCTCTATCGAGCACGAAGACGCACTCACATCCTCGAACGAAGGCCTCGAAAAGGCCGTGG
ACGTCCTCGACCGCGCCGTCTTCGAGACGCAACCCGGCGACGCCTACTGGGCGGAGTGAACAACGATGAC
TGAACCCCTCACAGTCGGTGTCCTCGGTTACCGATTCATGGGCAAAGCGCACTCCAACGCGCTCGCCCGC
CTCCCGATGTTCTTCCCCGACGCGCCGGACGTCGAGCGCTCGGTCATCATCGGCCGCGACGAAGAGGCCC
TCGCCGATGCCGCCGAGCGATTCGGCTTCGAATCGACGGCGACCGACTGGCGCGACGTCGTCGACGACGT
GGACGTGTTCTACAATCTCGGGCCGAACCACCTCCACGCCGAACCCTCGATTGCGGCGCTCGAAGCAGGC
GCACACGTCTTCTGCGAGAAACCGCTCGCGCCGACGCTGGACGAAGCCGAAGCGATGCGCGACGCCGCCC
GCGACGCCGCCCGCGACGCCGACGGCGTGGCCGGGTGCGCGTTCAACTACCGCTTCGTCCCGGCTATCCA
GTACGCGAAAGGCCTCATCGAAGACGGCGAACTCGGTGAGATTCACCACGTCCGCGGCCGCTACCTCCAA
GACTGGCTCGTCGACCCCGAGGCACCGTGGGCGTGGCGCATGGAGAAGGAGTACGCTGGGTCCGGCGCGC
TCGGCGACCTCGGCGCGCACACGGTCGACCTCGCGCGCTTCCTCGTCGGCGAGGTTGCGGGCGACATCGA
GCGCGTCTCCGGGCACCTCCAGACGTTCGTGGACGAGCGTCCGGTTCCCGGCACGGACGAGTACAAGCCC
GTCACGGTCGACGACGCGTACACCGCACAGGCCGAGTTCGAAAACGGCGCGGTCGGGTCGTTCGAGGCTT
CGCGCTTCGCCAACGGCCACAAGAACGACCACACCATCGAGATTCAGGGCTCGGACGGGAGTCTGAAGTT
CTCGCTCGAACGCCTCAACGAACTGGAGGTCATGACGGGCGATTCGCGCGGCTACGAAACGGTTCTCGTC
ACCGACGAAACAGACCCGTACGTGGACCACTGGTGGCCGCCAGGCCACGTCATTGGCTGGGAGCACACCT
TCGTCCACGAGAACTACGAGTTCCTGTCGGCGGCCGCCGAGGGAAGTGAGTTCTCCCCGTCGTTCGAGGA
GGCCTACGAAGTACAGGAGATTCTCGACGCAATCGAGCGCTCCGACGACAGCGGCGAGTGGGTCAGTCTG
GACTAA

>Haloferax_gibonsii-1
ATGTACATCGGAGTGCTCACCGTCCCGCTCGGAGACGAACCCCTCGACGACGCGCTCGACTACCTGTCCG
GTATCGGCGTCGACGGCGTCGAACTCGCCGTCGGCGGCTGGCCCGGCGAGGACCACGTCGACCGAAGCGC
CGTCCTCGCGGACGACGACGCGCAGGCCGACCTCCTCGATTCGGTCGAGAGTCGAGACCTGCAAATCAGC
GCGCTCGCGACGCACAACAACCCGCTTCACCCCGTCGAGGAGACGGCCGCCGAGGCCGACACCGAACTCC
GCGAGGCCATCGAACTCGCGGACGCCCTCGACGTGAACACCGTCACCTGTTTCTCGGGACTCCCCGCCGG
CGGCCCGAACGACGAGGTCCCGAACTGGATTACCGCGCCGTGGCCGACCGAGCACGCCGACGCCCACGAC
TACCAGTGGGAGGTCGCCGTCGACTACTGGTCGGACCTCGCCGCGTTCGCCGACGACCACGGCGTCGACA
TCGCCATCGAGATGCACCCGAACATGCTCGTCTACGAGCCCACGGGCATGCTGAAGCTCCGCGAGGCGAC
GAACGAGCGCATCGGCGCGAACTTCGACCCCTCGCACCTCTACTGGCAGGACATCTCCATCACCGACGCG
ATTCGGTTCCTCGGCGAGGAGGACGCCATCCACCACTTCCACGCGAAGGACACGAAGGTCTACGAGTCCG
AGTCGCGCATCAAGGGCGTCCTCGACACGACCTCCTACGCGGACACCGCCGACCGCTCGTGGCTCTTCCG
CTCTATCGGCTACGGCCACGACGAGGGCCACTGGAAGGACGTGGTCTCGACGCTCCGGATGGTCGGCTAC
GAGGGCGCGCTCTCCATCGAACACGAGGACGCGCTCACGTCGTCCAAGGAGGGGCTCGAAAAGGCCGTCG
ACGTGCTCTCGCGGGCCGTCTTCGAGACGCAACCCGGCGAAGCCTACTGGGCGGAGTAATCCATGTCTGA
ACCGCTCTCAGTCGGCGTCCTCGGCTACCGCTTCAGGCCCACCTTTTTGCGGTTCGGGGCCGCTTCGCGA
CCCGCTCTCCCCAAAAATCTGGACCAAAAAGTGCCGCGAGACTCGGCCTCCGGCCTCGCCCGCGGTACCG
CATCGGGCACGGAGGTGGCGCAATGACTGAACCGCTCTCAGTCGGCGTCCTCGGCTACCGCTTCATGGGG
AAGGCGCACTCCAACGCGCTCGCCCGCCTGCCGATGTTCTTCCCCGACGCGCCCGACGTGGAGCGCTCCG
TCATCGTCGGCCGCAACGAGGAGGCGCTCGCCGACGCCGCCGACCGGTTCGGCTTCGAATCGACTGCGAC
CGACTGGCGCGACGTGGTCGACGACGTGGACGTGTTCTACAACCTCGGCCCGAACCACCTCCACGCCGAA
CCCTCCGTCGCCGCGCTCGAAGCCGGTGCCAGCGTCTTCTGCGAGAAGCCGCTCGCGCCGACGCTCGACG
AGGCCGAGGCGATGCGCGACGCCGCCCGCGCGGCCGACGGCGTCGCCGGCTGCGCGTTCAACTACCGCTT
CGTCCCCGCCATCCAGTACGCGAAAGGACTCATCGAGAACGGCGAACTCGGCGAGATTCGGCACGTCCGC
GGGCGCTATCTCCAGGACTGGCTCGTCGACCCCGAAGCGCCGTGGTCGTGGCGAAACGACGCGGAACTCG
CCGGCTCCGGCGCGCTCGGCGACCTCGGCGCGCACACGGTCGACCTCGCGCGCTTCCTCGTCCGCGACGC
CGCGGGCGACATCGAACGCATCTCCGGGCACCTCCAGACGTTCGTCGACGAGCGGCCCGTGCCCGGCGCG
GACGAGTACAAGCCCGTGACCGTCGACGACGCCTACACCGCGCAGGCGGAGTTCGGAAACGGCGCGGTCG
GGAACTTCGAGGCCTCGCGGTTCGCCGACGGGCACAAGAACGACCACACCATCGAGGTTCACGGCTCCGA
GGGGAGCCTGCAGTTCTCGCTCGAACGCCTCAACGAACTGGAGGTGAAGACCGGCGACGCCCGCGGCTAC
GAGACGGTGCTCGTCACCGACGAGGACGACCCCTACCTCGACCACTGGTGGCCCCCGGGCCACGTCCTCG
GCTGGGAACACACCTTCGTCCACGAGAACTACGAGTTCCTGTCGGCGGTCGCCGAGGGCGGCGAGTTCTC
CCCCTCGTTCGAGGACGCCTACGAGGTCCAGACAGTGCTCGACGCCATCGAGCGCTCCGACGAGACCGGC
GAGTGGGTCAGCCTCGGCTGA

>Haloferax_larsenii-1
CTAGTCCAGACTGACCCACTCGCCGCTGTCGTCGGAGCGCTCGATTGCGTCGAGAATCTCCTGTACTTCG
TAGGCTTCCTCGAACGAGGGAGAGAACTCACTTCCCTCGGCGGCCGCCGACAGGAACTCGTAGTTCTCGT
GGACGAAAGTGTGCTCCCAGCCGATGACGTGGCCCGGCGGCCACCAGTGGTCCACGTAGGGGTCGGTTTC
GTCGGTGACGAGCACGGTTTCGTAGCCGCGCGAATCACCCGTCATGACCTCCAGTTCGTTGAGGCGTTCG
AGCGAGAACTTCAGACTCCCGTCCGAGCCCTGAATCTCGATGGTGTGGTCGTTCTTGTGGCCGTTGGCGA
AGCGCGAGGCCTCGAACGACCCGACCGCGCCGTTTTCGAACTCGGCCTGCGCGGTGTAGGCGTCGTCGAC
GGTGACGGGCTTGTACTCGTCCGTGCCCGGAACCGGGCGCTCGTCGACGAACGTCTGGAGGTGTCCAGAG
ACGCGTTCGATATCGCCCGCAACCTCGCCGACGAGGAAGCGCACGAGGTCCACGGTGTGCGCGCCGAGGT
CGCCGAGCGCCCCGGACCCGGCGTACTCCTTCTCCATGCGCCACGCCCACGGTGCCTCGGGGTCGACCAG
CCAGTCTTGCAGGTAGCGGCCGCGGACGTGGTGAATCTCACCGAGTTCACCGTCTTCGATGAGGTCTTTC
GCGTACTGGATGGCCGGGACGAAACGGTAGTTGAACGCGCACCCGGCCACGCCGTCGGTGTCGCGGGCGG
CGTCGCGCATCGCTTCGGCTTCATCCAGCGTCGGCGCGAGGGGTTTCTCGCAGAAGACGTGCGCCCCTGC
TTCGAGCGCCGCAATCGAGGGTTCGGCGTGGAGGTGGTTCGGCCCGAGGTTGTAGAACACGTCCACGTCG
TCGACGACGTCGCGCCAGTCGGTCGCCGTCGATTCGAAGCCGAATCGGTCGGCGGCGTCGGCGAGCGCCT
CCTCGTCGCGGCCGATGATGACCGAGCGCTCGACGTCCGGCGCGTCGGGGAAGAACATCGGGAGGCGAGC
GAGCGCGTTGGAGTGCGCTTTGCCCATAAAGCGGTAGCCTAAGACGCCGACTGTGAGGGGTTCAGACATG
CAGAATCACTCCGCCCAGTAGGCATCGCCGGGTTGCGTCTCGAAGACGGCGCGGTCGAGCACGTCGACGG
CCTTTTCCAGCCCCTCGTTCGAGGACGTGAGCGCGTCTTCGTGTTCGATAGAGAGCGCACCCTCGTAGCC
GACCATCCGGAGCGTCGAGACGACGTCTTTCCAGTGTTCTTCGCCGTGGCCGTAGCCGATAGACCGGAAG
AGCCACGAGCGGTCGGCGGTGTCGGCGTAGGAAGTGGTATCGAGGACGCCCTTGACGCGCGATTCGGACT
CGTACACCTTCGTGTCCTTCGCGTGGAAGTGGTGGATGGCGTCGTGTTCGCCGAGGAATCGAATCGCGTC
GGTGATGGAGATATCCTGCCAGTAGAGGTGCGAGGGGTCGAAGTTCGCGCCGATGCGCTCGTTTGTCGCC
TCGCGGAGTTTCAGCATCCCCGTCGGCTCGTAAACGAGCATGTTGGGGTGCATCTCGATTGCCATGTCGA
CGCCGTGGTCGTCGGCGTATTCGGCGAGGTCGGACCAGTAGTCGATGGCGACGTCCCACTGGTACTCGTG
GGCGTCGGCGTGCTCGGTCGGCCACGGGGCCGTAATCCAGTTCGGGACTTCGTCGTTCGGGCCGCCCGCG
GGCAGGCCGGAGAAACAGGTGACGGTGTTCACGTCGAGCGCGTCGGCGAGTTCGATAGCCTCGCGGAGTT
CCGTGTCCGCCTCGGCCGCCGTCTCCTCGTCCGGGTGAAGCGGGTTGTTGTGGGTCGCCAGCGCGCTAAT
CTGCATGTCTCGGCCTTCGACGGCCGCGAGCAGGTCGGCCTGTGCGTCTTCGTCGCCGAGGACTGCTGTG
CGGTCGACGTGGTCTTCGCCGGGCCAGCCACCGACACCGAGTTCGACACCTTCGACGCCGATACTCGACA
GGTAGTCGAGCGCGTCGTCGAGGGATTCGTTCCCGAGCGGGACAGTGAGCACTCCGATGTACAT

>Haloferax_lucentense-1
ATGTACATCGGAGTGCTCACCGTCCCGCTCGGAGACGAACCCCTCGACGACGCGCTCGACTATCTGTCGG
GCATCGGCGTCGACGGCGTCGAACTCGCCGTCGGCGGCTGGCCCGGCGAGGACCACGTCGACCGGAGCGC
CGTCCTCGCGGACGACGACGCGCAGGCCGACCTCCTCGATTCGGTCGAAAGTCGGGACCTGCAAATCAGC
GCGCTCGCGACGCACAACAACCCGCTGCATCCCGTCGAGGAGACGGCCGCCGAGGCCGACACCGAACTCC
GCGAGGCAATCGAACTCGCGGACGCCCTCGACGCGAACACCGTCACCTGTTTCTCGGGACTCCCCGCCGG
CGGCCCGAACGACGAGGTGCCGAACTGGATTACCGCGCCGTGGCCGACCGAGCACGCCGACGCCCACGAC
TACCAGTGGGAGGTCGCCGTCGACTACTGGTCCGACCTCGCCGCGTTCGCGGACGACCACGGCGTCGACA
TCGCCATCGAGATGCACCCGAACATGCTCGTCTACGAGCCGACGGGGATGCTGAAGCTCCGCGAGGCGAC
CAACGAGCGCATCGGCGCGAACTTCGACCCCTCGCACCTCTACTGGCAGGACATCTCCATCACCGACGCG
ATTCGGTTCCTCGGCGAGGCGGACGCCATCCACCACTTCCACGCGAAGGACACGAAGGTGTACGAGTCCG
AGTCGCGCATCAAGGGCGTCCTCGACACGACCTCCTACGCGGACACCGCCGACCGCTCGTGGCTGTTCCG
GTCTATCGGCTACGGTCACGACGAGGGCCACTGGAAGGACGTGGTGTCGACGCTCCGGATGGTCGGCTAC
GAGGGCGCGCTCTCCATCGAACACGAGGACGCGCTCACGTCGTCCACGGAGGGACTCGAAAAGGCCGTCG
ACGTGCTCTCGCGCGCCGTCTTCGAAACGCAACCCGGCGACGCCTACTGGGCGGAGTAATCCAATGACTG
ACCCACTCTCTATCGGCGTCCTCGGCTACCGATTCATGGGGAAGGCGCACTCCAACGCGCTCGCCCGCCT
GCCGATGTTCTTCCCCGACGCGCCCGACGTGGAGCGCTCCGTCATCGTCGGCCGCGACGAGGAGGCGCTT
TCCGACGCGGCGGAGCGCTTCGGCTTCGAATCGACCGCGACCGACTGGCGCGACGTGGTCGACGACGTGG
ACGTGTTCTACAACCTCGGCCCGAACCACCTCCACGCCGAACCCTCCATCGCCGCGCTCGAAGCCGGTGC
CAGCGTCTTCTGCGAGAAGCCGCTCGCGCCGACGCTCGACGAGGCCGAGGCGATGCGCGACGCCGCCCGC
GCGGCCGACGGCGTCGCCGGCTGTGCGTTCAACTACCGCTTCGTGCCCGCCATCCGGTACGCCAAGCGAC
TCATCGAGAGCGGCGAACTCGGCGAGATTCGACACGTTCGCGGGCGCTACTTGCAGGATTGGCTCGTCGA
CGCCGACGCGCCGTGGACGTGGCGCATGGACGAAGACGCCGCCGGCTCCGGCGCGCTCGGTGACCTCGGC
GCGCACACCATCGACCTCGTTCGGTTCCTCGTCGGTGACCGCGCCGGCGACATCGACCGCATCTCGGGGC
ATCTCCAGACGTTCGTCGACGAGCGGCCCGTCCCCGGCGAGGACGAGTACCGGCCCGTGACCGTCGACGA
CGCCTACACCGCGCAGGCCGAGTTCGAAAACGGCGCGGTCGGGAGCTTCGAGGCCTCGCGCTTCGCAGAC
GGCCACAAGAACGACCACACCATCGAGATTCACGGCTCCGAGGGCAGCCTTCAGTTCTCGCTCGAACGCC
TCAACGAACTGGAGGTGAAAACCGGCGACGCCCGCGGCTACGAGACGGTGCTCGTCACCGACGAGGACGA
CCCCTACCTCGACCACTGGTGGCCGCCGGGCCACGTCCTCGGCTGGGAACACACGTTCGTCCACGAGAAC
TACGAGTTCCTGTCGGCGGTCGCCGGCGGCGGCGACTTCTCGCCGTCGTTCGAGGACGGCTACGAGGTCC
AGTCGATTCTCGACGCCATCGAGCGCTCCGACGCGGCCGGCGAGTGGGTCAGCCTCGGCTGA

>Haloferax_mediterranei-1
CTATTCGAGGCTGACCCACTCGCCGGTCTCGTCGGACCGCTCGATGGCGTCGAGCACTTCTTGGACCTCG
TAGGCGTCCTCGAACGATGGGTGGAACTCGCCACCTTCGGCCGCCTCGCCGGACTGCGTCCGGCTGCCCG
CAGCGGCCCGCTCTGCGACGGCGGTGAGGAACTCGTAGTTCTCGTGGACGAAGGTGTGTTCCCAGCCGAT
GACGTGGCCCGGTGGCCACCAGTTTCCTACGTAGGGGTCCGACTCGTCGGTGACGAGCACGGTCTCGTAG
CCGCGGGCGTCGCCCGTCTTTACCTCCAGTTCGTTGAGGCGTTCGAGCGAGAACGTCAGACTCCCCTCGG
AGCCGTGAATCTCGATGGTGTGGTCGTTCTTGTGGCCGTCGGCGAATCGAGAGGCTTCGAACGAGCCGAC
TGCGCCGTTTTCGAACTCGGCCTGTGCCGTGTAGGCGTCGTCGACCGTGACGGGTTTGTACTCGTCCGTT
CCGGGCACCGGTCGCTCGTCGACGAACGTCTGGAGGTGGCCGGAGACGCGTGTAATGTCGCCCGCGACAT
CCGAATCCCCGACGAGGAAGCGCACGAGGTCGATAGTGTGCGCACCGAGGTCGCCGAGCGCGCCGGACCC
GGCGAGGTCTTTGTCCATGCGCCACGCCCACGGTGCTTCGGGGTCGACGAGCCAATCCTGTAGGTAGCGT
CCGCGGACATGGTGAATCTCACCGAGTTCGCCGTCCTCGATGAGACCCTTCGCGTACTGAATCGCCGGGA
CGAACCGGTAGTTGAACGCGCATCCGGCCACGCCGTCGGCGTCGCGGGCGGCGTCGCGCATCTCTTCGGC
TTCTTCGAGCGTCGGGGCGAGCGGTTTCTCACAGAAGACGTGTGCACCGGCTTCGAGGGCCGCGATGGAC
GGTTCGGCGTGGAGATGGTTCGGCCCGAGGTTGTAGAACACGTCCACATCGCCGACCACGTCGCGCCAGT
CCGTCGCCGTCGACTCGAAGCCGAAGCGGTCGGCGGCATCGGCGAGGGCTTCCTCGTCGCGACCGACGAT
GACGGAGCGCTCTACGTCCGGCGCGTCGGGGAAGAACATCGGCAGGCGTGCGAGGGCGTTCGCGTGCGCC
TTACCCATGAATCGGTAGCCGAGGACGCCGATTTTGAGGGATTCAGTCATTGTGTCACCCCACCAGCCGA
TTCAGTACCGCGAGCGAGGCCGAAGGCCGAGTCTCGTGGCACTTTTTGGTCCAGATTTTTCCGGTGAGCG
GGCCACGAAGCGGCCCCGAACCGGAAAAAGGTGGGCCTGAATCGGTAGCCGAGGACGCCGATTTTGAGGG
GTTCGGTCGTAGAATCGGTGTTACTCATCGAGAATCACTCCGCCCAGTAGGCCTCGCCGGGTTGCGTTTC
GAAGACGGCGCGCGAGAGCACGTCGACGGCCTTCTCCAGTCCCTCGTTCGAGGAGGTGAGCGCGTCTTCG
TGTTCGATAGAGAGCGCGCCCTCGTAGCCGACCATTCGAAGCGTCGAGACCACGTCCTTCCAGTGGCCTT
CGTCGTGGCCGTAGCCAATCGAGCGGAAGAGCCACGAGCGGGCGGCGGTGTCGGTGTAGGAGGTGGTGTC
GAGGACACCCTTGACCTTCGCGTGGTGGTCGTACACTTTCGTGTCCTTCGCGTGGAAGTGGTGGATAGCG
TCGTGGTCGCCGAGGAAGCGAATCGCTTCGGTTACGTCGATATCCTGCCAATAGAGGTGCGAAGGGTCGA
AGTTCGCACCGATGCGTTCGTTGGTCGCCTCGCGCAGACGCATCATGCCCGTCGGTTCGTAGACGAGCAT
GTTCGGGTGCATCTCGATGGCCATGTCGACGCCGTGGTCGTCGGCGAATTCGGCGAGGTCGGACCAGTAG
TCGATGGCGACGTCCCACTGGTACTCGTGGGCGTCGGCGTGCTCGGTCGGCCACGGGGCCGTAATCCAGT
TCGGCACTTCGTCGTTCGGGCCGCCTGCCGGGAGGCCGGAGAAACACGTGACGGTGTTTACGTCGAGGAC
ACTGGCGAGTTCGATTGCCTCGCGGAGTTCTTCGTCCGCCTCGGCGGCTGTTTCTTCGTCGGGATGCAGC
GGGTTGTTGTGAGTCGCTAGCGCGCTGATTTGCATCTCGCGCTCCTCGACGGCGGCGAGCAGGGCAGCCT
GTCTCTCGTCGTCACCGAGGACGGCCGCTCGGTCGACGTGGTCTTCGCCGGGCCATCCGCCGACGCCGAG
TTCGACGCCTTCGACGCCGATACCCGACAGATAGTCGAGCGCGTCGGCGAGAGATTCGTTTCCGAGTGGG
ACAGTGAGCACACCGATGTACAT

>Haloferax_mucosum-1
TTATTCGAGACTGACCCACTCGCCGCTGTCGTCCGACCGCTCGATGGCGTCAAGAACCTTCTGTACTTCG
TAGGCGTCCTCGAACGACGGGTGGAACTCGCTACCGTCTGCGACCGCCGAGAGGAACTCGTAGTTCTCGT
GGACGAAGGTGTGTTCCCAGCCGATGACGTGGCCCGGCGGCCACCAGTTTCTCACGTAGGGGTCCGATTC
GTCGGTGACGAGCACGGTTTCGTAGCCGCGGGCGTCGCCCGTCTTCACCCTGAGTTCGTTGAGGCGTTCG
AGCGAGAACGTCAGACTCCCATCGGAGCCGTGAATCTCGATGGTGTGGTCGTTTTTGTGGCCGTCGGCGA
ACCGGGACGCCTCGAACGAGCCGACCGCGCCGTTTTCGAACGCGGCCTGCGCAGTGTAGGCGTCATCGAC
GGTGACGGGTTTGTACTCGTCCGTTCCGGGGACCGGTCGTTCGTCTACGAAGGTCTGGAGGTGGCCGGAC
ACGCGTTCGATGTCGCCCGCGACGTCGGCGACGAGGAAGCGCGCGAGGTCGATGGTGTGTGCGCCGAGAT
CGCCGAGCGCGCCGGACCCGGCGAGGTCTTTGTCCATGCGCCACGCCCACGGCGCTTCGGGGTCAACGAG
CCAGTCTTGAAGATAGCGCCCGCGAACGTGTCGAATCTCCCCAAGTTCGCCGTCTTCGATGAGGCCTTTC
GCGTACTGAATCGCCGGGACGAAGCGGTAGTTGAACGCACACCCGGCCACGCCGTCGGCGTCGCGGGCGG
CGTCGCGCATCGCTTCTGCCTCGTCGAGCGTCGGCGCGAGCGGTTTCTCGCAAAAGACGTGTGCGCCGGC
TTCGAGGGCCGCAATCGAGGGTTCCGCGTGGAGGTGGTTCGGTCCGAGGTTGTAGAACACGTCAACGTCG
TCCACGACGTCGCGCCAATCGGTCGCCGTCGATTCGAAGCCGAATCGGTCGGCGGCGTCGGCGAGGGCCT
CCTCGTCGCGGCCGACGATAACGGAGCGCTCGACGTCGGGCGCGTCGGGGAAGAACATCGGGAGGCGCGC
GAGGGCGTTGGAGTGGGCTTTGCCCATGAAGCGGTAGCCGAGGACACCGACTTTGAGGGGTTCAGATGAT
GAATTAGAGTCACTCATACAGAATCACTCCGCCCAGTAGGCGTCGCCGGGTTGCGTCTCGAAGACGGCCC
GGTCGAGCACGTCCACGGCCTTTTCTAATCCCTCGTTCGAGGACGTGAGCGCGTCCTCGTGTTCGATAGA
GAGCACGCCCTCGTAGCCGACCATGCGCAGAGTGGAGACGACGTCCTTCCAGTGGCCTTCGTCGTGGCCG
TAGCCGATAGAACGGAAGAGCCACGAGCGGTCGGCCGTATCGGCGTAGGAGGTGGTGTCGAGAACGCCTT
TGACCTTCGAGTGGTGGTCGTAGACCTTCGTGTCCTTCGCGTGGAAGTGGTGGATGGCGTCGTGGTCGCC
GAGGAAACGAATCGCCTCGGTGACGTCGATATCCTGCCAGTAGAGGTGCGAAGGGTCGAAGTTCGCGCCG
ATGCGCTCGTTTGTCGCCTCCCGGAGTTTCAACATGCCCGTGGGTTCGTAGACGAGCATGTTCGGGTGCA
TCTCGATGGCCATATCGACGCCGTGGTCGTCGGCGAAGGCGGCGAGGTCGGACCAGTAGTCGATGGCAAC
GTCCCACTGGTACTCGTGGGCGTCGGCGTGCTCTGTCGGCCACGGTGCCGTAATCCAGTTCGGAACCTCG
TCGTTCGGACCGCCCGCGGGGAGACCGGAGAAACACGTAACCGTGTCCACGCCGAGCGCGTCGGCGAGTT
CGATTGCCTCTCGGAGTTCCGTGTCCGCGTCGGCCGCTGTCTCCTCGTCAGGGTGGAGCGGGTTGTTGTG
CGTCGCTAACGCGCTAATCTGCATCTCGCGGCGCTCGACGGCGGCGAGGAGGTCGGCCTGTTTGTCCTCG
TCGTCGAGGACGGCCGTCCGCGAAACGTGGTCTTCGCCGGGCCAGCCGCCGACGCCGAGTTCGACGCCCT
CGACGCCGATACCCGACAGATAGTCGAGCGCACCGTCGAGAGATTCGTTTCCGAGCGGGACAGTGAGCAC
TCCGATGTACAT

>Haloferax_prahovense-1
ATGTACATCGGAGTGCTCACCGTCCCGCTCGGAGACGAACCCCTCGACGACGCGCTCGACTACCTGTCCG
GTATCGGCGTCGACGGCGTCGAACTCGCCGTCGGCGGCTGGCCCGGCGAGGACCACGTCGACCGAAGCGC
CGTCCTCGCGGACGACGACGCGCAGGCCGACCTCCTCGACTCGGTCGAGAGCCGAGACCTGCAAATCAGC
GCGCTCGCGACGCACAACAACCCGCTTCACCCCGTCGAGGAGACGGCCGCCGAGGCCGACACCGAACTCC
GCGAGGCCATCGAACTCGCGGACGCCCTCGACGTGAACACCGTCACCTGTTTCTCGGGACTCCCCGCCGG
CGGCCCGAACGACGAGGTACCGAACTGGATTACCGCGCCGTGGCCGACCGAGCACGCCGACGCCCACGAC
TACCAGTGGGAGGTCGCCGTCGACTACTGGTCGGACCTCGCCGCGTTCGCCGACGACCACGGCGTGGACA
TCGCCATCGAGATGCACCCGAACATGCTCGTCTACGAGCCCACGGGCATGCTGAAGCTCCGCGAGGCGAC
GAACGAGCGCATCGGCGCGAACTTCGACCCCTCGCACCTCTACTGGCAGGACATCTCCATCACCGACGCG
ATTCGGTTCCTCGGCGAGGAGGACGCCATCCACCACTTCCACGCGAAGGACACGAAGGTCTACGAGTCCG
AGTCGCGCATCAAGGGCGTCCTCGACACGACCTCCTACGCGGACACCGCCGACCGCTCGTGGCTGTTCCG
CTCTATCGGCTACGGCCACGACGAAGGCCACTGGAAGGACGTGGTCTCGACGCTCCGGATGGTCGGCTAC
GAGGGCGCGCTCTCCATCGAACACGAGGACGCGCTCACGTCGTCCAAGGAGGGCCTCGAAAAGGCCGTCG
ACGTGCTCTCGCGGGCCGTCTTCGAGACGCAACCCGGCGAAGCCTACTGGGCGGAATAACTCATGTCTGA
ACCCCTCAAAATCGGCGTTCTCGGCTACCGCTTCAGGCCCACCTTTTTGCGGTTCGGGGCCGCTTCGCGA
CCCGCTCACCCCAAAAATCTGGACCAAAAAGTGCCGCGAGACTCGGCCTCCGGCCTCGCCCGCGGTACCG
CATCGGGCACGGAGGTGGCGCAATGACTGAACCGCTCTCAGTCGGCGTCCTCGGCTACCGCTTCATGGGG
AAGGCCCACTCCAACGCGCTCGCCCGCCTGCCGATGTTCTTCCCCGACGCGCCCGACGTGGAGCGCTCCG
TCATCGTCGGCCGCAACGAGGAGGCGCTCGCCGACGCCGCAGACCGATTCGGCTTCGAATCGACCGCGAC
CGACTGGCGCGACGTGGTCGACGACGTGGACGTGTTCTACAACCTCGGCCCGAACCACCTCCACGCCGAA
CCCTCCGTCGCCGCGCTCGAAGCCGGTGCTAGCGTCTTCTGCGAGAAGCCGCTCGCGCCGACGCTCGACG
AGGCCAAGGCGATGCGCGACGCCGCCCGCGCGGCCGACGGCGTCGCCGGCTGCGCGTTCAACTACCGCTT
CGTCCCCGCCATCCGGTACGCGAAGGGACTCATCGAAGACGGCGAACTCGGCGAGATTCGGCACGTCCGC
GGGCGTTACCTGCAGGACTGGCTCGTCGACCCCGAAGCGCCGTGGTCGTGGCGGAACGATGAGGAACTCG
CCGGCTCCGGCGCGCTCGGCGACCTCGGCGCGCACACGGTCGACCTCGCGCGCTTCCTCGTCCGCGACGC
CGCGGGCGACATCGAACGCATCTCCGGGCACCTCCAGACGTTCGTCGACGAGCGGCCCGTGCCCGGCGCG
GACGAGTACAAGCCCGTGACCGTCGACGACGCCTACACCGCGCAGGCGGAGTTCGGAAACGGCGCGGTCG
GGAACTTCGAGGCTTCGCGGTTCGCCGACGGCCACAAGAACGACCACACCATCGAGATTCACGGCTCCGA
GGGGAGCCTGCAGTTCTCGCTCGAACGCCTCAACGAACTGGAGGTGAAGACCGGCGACGCCCGCGGCTAC
GAGACGGTGCTGGTCACCGACGAGGACGACCCCTACCTCGACCACTGGTGGCCGCCGGGCCACGTCCTCG
GCTGGGAACACACCTTCGTCCACGAGAACTACGAGTTCCTGTCGGCGGTCGCCGACGGCGGCGACTTCTC
GCCCTCGTTCGAGGACGCCTACGAGGTTCAAGAAGTGCTCGACGCCATCGAGCGCTCCGACGAGACCGGC
GAGTGGGTCAGCCTCGGCTGA

>Haloferax_sp_GUBF-1-1
TCAGCCGAGGCTGACCCACTCGCCGGCCGCGTCGGAGCGCTCGATGGCGTCGAGAATCGACTGGACCTCG
TAGCCGTCCTCGAACGACGGCGAGAACTCGCCGCCGTCGGCGGCCGCCGACAGGAACTCGTAGTTCTCGT
GGACGAACGTGTGTTCCCAGCCGAGGACGTGGCCCGGCGGCCACCAGTGGTCGAGGTAGGGGTCGTCCTC
GTCGGTGACGAGTACCGTCTCGTAGCCGCGGGCGTCGCCGGTTTTCACCTCCAGTTCGTTGAGGCGTTCG
AGCGAGAACTGCAGGCTTCCCTCGGAGCCGTGAATCTCGATGCTGTGGTCGTTCTTGTGGCCGTCAGCGA
AGCGCGAGGCCTCGAAGCTCCCGAGCGCGCCGTTTTCGAACTCGGCCTGCGCGGTGTAGGCGTCGTCGAC
GGTGACGGGCCGGTACTCGTCCTCGCCGGGCACGGGTCGCTCGTCGACGAACGTCTGGAGATGCCCCGAG
ATGCGGTCGATGTCGCCGGCGCGGTCACCGACGAGGAACCGAACGAGGTCGATGGTGTGCGCGCCGAGGT
CACCGAGCGCGCCGGAGCCGGCGGCGTCTTCGTCCATGCGCCACGTCCACGGCGCGTCGGAATCGACGAG
CCAATCCTGCAAGTAGCGCCCGCGGACGTGTCGAATCTCGCCGAGTTCGCCGTTCTCGATGAGCTTCTTC
GCGTACCGGATGGCAGGCACGAATCGGTAGTTGAACGCGCAGCCGGCGACGCCGTCGGCCGCGCGGGCGG
CGTCGCGCATCGCCTCGGCCTCGTCGAGCGTCGGTGCGAGCGGCTTCTCGCAGAAGACGCTGGCACCGGC
TTCGAGCGCGGCGATGGAGGGTTCGGCGTGGAGGTGGTTCGGGCCGAGGTTGTAGAACACGTCCACGTCG
TCGACCACGTCGCGCCAGTCGGTTGCGGTCGATTCGAAGCCGAAGCGGTCGGCGGCGTCGGAAAGCGCCT
CCTCGTCGCGGCCGACGATGACGGAGCGCTCCACGTCGGGCGCGTCGGGGAAGAACATCGGCAGGCGGGC
GAGCGCGTTGGAGTGCGCCTTGCCCATAAAGCGGTAGCCGAGGACGCCGATAGAGAGCGGGTCAGTCATT
GTGCCACCTCCGTGGCCGATGCAGTACCGCGAGCGAGGCCGGAGGCCGAGTCTCGCGGCGTTTTTTGGTC
CAGATTTTTCCGGTGAGCGGGTCGCGGAGCGGCCCCGAACCGGAAAAAGGTGGGCCTGAATCGGGAGCCG
AGGACGCCGATAGAGAGTTGTTCAGTCATTGGATTACTCCGCCCAGTAGGCGTCGCCCGGTTGCGTCTCG
AAGACGGCGCGCGAGAGCACGTCGACGGCCTTTTCGAGGCCCTCCGTGGACGACGTGAGCGCGTCCTCGT
GTTCGATGGAGAGCGCGCCCTCGTAGCCGACCATCCGGAGCGTCGAGACCACGTCCTTCCAGTGGCCCTC
GTCGTGGCCGTAACCGATAGAGCGGAACAGCCACGAGCGGTCGGCGGTGTCCGCGTAGGAGGCCGTGTCG
AGGACGCCCTTGATGCGCGACTCGGACTCGTAGACCTTCGTGTCCTTCGCGTGGAAGTGGTGGATGGCGT
CCGCCTCGCCGAGGAACCGAATCGCGTCGGTGATGGAGATGTCCTGCCAGTAGAGGTGCGAGGGGTCGAA
GTTCGCGCCGATGCGGTCGTTGGTCGCCTCGCGGAGCTTCAGCATCCCCGTCGGCTCGTAGACGAGCATG
TTCGGGTGCATCTCGATGGCGATGTCGACGCCGTGGTCGTCCGCGAACGCGGCGAGGTCGGACCAGTAGT
CGACGGCGACCTCCCACTGGTAGTCGTGGGCGTCGGCGTGCTCGGTCGGCCACGGCGCGGTAATCCAGTT
CGGAACCTCGTCGTTCGGACCGCCGGCGGGGAGCCCCGAGAAACAGGTAACGGTGTTCGCGTCGAGGGCG
TCCGCGAGTTCGATTGCCTCGCGGAGTTCGGTGTCCGCCTCGGCGGCCGTCTCCTCGATGGGATGCAGCG
GGTTGTTGTGCGTCGCGAGCGCGCTGATTTGCAGGTCGCGACTCTCGACCGAATCGAGGAGGTCGGCCTG
CGCGTCGTCGTCCGCGAGGACGGCGCTCCGGTCGACGTGATCCTCGCCGGGCCAGCCGCCGACGGCGAGT
TCGACGCCGTCGACGCCGATGCCCGACAGGTAGTCGAGCGCGTCGTCGAGGGGTTCGTCTCCGAGCGGGA
CGGTGAGCACTCCGATGTACAT

>Haloferax_sp_GUBF-2-1
TCAGCCGAGGCTGACCCACTCGCCGGCCGCGTCGGAGCGCTCGATGGCGTCGAGAATCGACTGGACCTCG
TAGCCGTCCTCGAACGACGGCGAGAACTCGCCGCCGTCGGCGGCCGCCGACAGGAACTCGTAGTTCTCGT
GGACGAACGTGTGTTCCCAGCCGAGGACGTGGCCCGGCGGCCACCAGTGGTCGAGGTAGGGGTCGTCCTC
GTCGGTGACGAGTACCGTCTCGTAGCCGCGGGCGTCGCCGGTTTTCACCTCCAGTTCGTTGAGGCGTTCG
AGCGAGAACTGCAGGCTTCCCTCGGAGCCGTGAATCTCGATGCTGTGGTCGTTCTTGTGGCCGTCAGCGA
AGCGCGAGGCCTCGAAGCTCCCGAGCGCGCCGTTTTCGAACTCGGCCTGCGCGGTGTAGGCGTCGTCGAC
GGTGACGGGCCGGTACTCGTCCTCGCCGGGCACGGGTCGCTCGTCGACGAACGTCTGGAGATGCCCCGAG
ATGCGGTCGATGTCGCCGGCGCGGTCACCGACGAGGAACCGAACGAGGTCGATGGTGTGCGCGCCGAGGT
CACCGAGCGCGCCGGAGCCGGCGGCGTCTTCGTCCATGCGCCACGTCCACGGCGCGTCGGAATCGACGAG
CCAATCCTGCAAGTAGCGCCCGCGGACGTGTCGAATCTCGCCGAGTTCGCCGTTCTCGATGAGCTTCTTC
GCGTACCGGATGGCAGGCACGAATCGGTAGTTGAACGCGCAGCCGGCGACGCCGTCGGCCGCGCGGGCGG
CGTCGCGCATCGCCTCGGCCTCGTCGAGCGTCGGTGCGAGCGGCTTCTCGCAGAAGACGCTGGCACCGGC
TTCGAGCGCGGCGATGGAGGGTTCGGCGTGGAGGTGGTTCGGGCCGAGGTTGTAGAACACGTCCACGTCG
TCGACCACGTCGCGCCAGTCGGTTGCGGTCGATTCGAAGCCGAAGCGGTCGGCGGCGTCGGAAAGCGCCT
CCTCGTCGCGGCCGACGATGACGGAGCGCTCCACGTCGGGCGCGTCGGGGAAGAACATCGGCAGGCGGGC
GAGCGCGTTGGAGTGCGCCTTGCCCATAAAGCGGTAGCCGAGGACGCCGATAGAGAGCGGGTCAGTCATT
GTGCCACCTCCGTGGCCGATGCAGTACCGCGAGCGAGGCCGGAGGCCGAGTCTCGCGGCGTTTTTTGGTC
CAGATTTTTCCGGTGAGCGGGTCGCGGAGCGGCCCCGAACCGGAAAAAGGTGGGCCTGAATCGGGAGCCG
AGGACGCCGATAGAGAGTTGTTCAGTCATTGGATTACTCCGCCCAGTAGGCGTCGCCCGGTTGCGTCTCG
AAGACGGCGCGCGAGAGCACGTCGACGGCCTTTTCGAGGCCCTCCGTGGACGACGTGAGCGCGTCCTCGT
GTTCGATGGAGAGCGCGCCCTCGTAGCCGACCATCCGGAGCGTCGAGACCACGTCCTTCCAGTGGCCCTC
GTCGTGGCCGTAACCGATAGAGCGGAACAGCCACGAGCGGTCGGCGGTGTCCGCGTAGGAGGCCGTGTCG
AGGACGCCCTTGATGCGCGACTCGGACTCGTAGACCTTCGTGTCCTTCGCGTGGAAGTGGTGGATGGCGT
CCGCCTCGCCGAGGAACCGAATCGCGTCGGTGATGGAGATGTCCTGCCAGTAGAGGTGCGAGGGGTCGAA
GTTCGCGCCGATGCGGTCGTTGGTCGCCTCGCGGAGCTTCAGCATCCCCGTCGGCTCGTAGACGAGCATG
TTCGGGTGCATCTCGATGGCGATGTCGACGCCGTGGTCGTCCGCGAACGCGGCGAGGTCGGACCAGTAGT
CGACGGCGACCTCCCACTGGTAGTCGTGGGCGTCGGCGTGCTCGGTCGGCCACGGCGCGGTAATCCAGTT
CGGAACCTCGTCGTTCGGACCGCCGGCGGGGAGCCCCGAGAAACAGGTAACGGTGTTCGCGTCGAGGGCG
TCCGCGAGTTCGATTGCCTCGCGGAGTTCGGTGTCCGCCTCGGCGGCCGTCTCCTCGATGGGATGCAGCG
GGTTGTTGTGCGTCGCGAGCGCGCTGATTTGCAGGTCGCGACTCTCGACCGAATCGAGGAGGTCGGCCTG
CGCGTCGTCGTCCGCGAGGACGGCGCTCCGGTCGACGTGATCCTCGCCGGGCCAGCCGCCGACGGCGAGT
TCGACGCCGTCGACGCCGATGCCCGACAGGTAGTCGAGCGCGTCGTCGAGGGGTTCGTCTCCGAGCGGGA
CGGTGAGCACTCCGATGTACAT

>Haloferax_sp_GUBF-3-1
TCAGCCGAGGCTGACCCACTCGCCGGCCGCGTCGGAGCGCTCGATGGCGTCGAGAATCGACTGGACCTCG
TAGCCGTCCTCGAACGACGGCGAGAACTCGCCGCCGTCGGCGGCCGCCGACAGGAACTCGTAGTTCTCGT
GGACGAACGTGTGTTCCCAGCCGAGGACGTGGCCCGGCGGCCACCAGTGGTCGAGGTAGGGGTCGTCCTC
GTCGGTGACGAGTACCGTCTCGTAGCCGCGGGCGTCGCCGGTTTTCACCTCCAGTTCGTTGAGGCGTTCG
AGCGAGAACTGCAGGCTTCCCTCGGAGCCGTGAATCTCGATGCTGTGGTCGTTCTTGTGGCCGTCAGCGA
AGCGCGAGGCCTCGAAGCTCCCGAGCGCGCCGTTTTCGAACTCGGCCTGCGCGGTGTAGGCGTCGTCGAC
GGTGACGGGCCGGTACTCGTCCTCGCCGGGCACGGGTCGCTCGTCGACGAACGTCTGGAGATGCCCCGAG
ATGCGGTCGATGTCGCCGGCGCGGTCACCGACGAGGAACCGAACGAGGTCGATGGTGTGCGCGCCGAGGT
CACCGAGCGCGCCGGAGCCGGCGGCGTCTTCGTCCATGCGCCACGTCCACGGCGCGTCGGAATCGACGAG
CCAATCCTGCAAGTAGCGCCCGCGGACGTGTCGAATCTCGCCGAGTTCGCCGTTCTCGATGAGCTTCTTC
GCGTACCGGATGGCAGGCACGAATCGGTAGTTGAACGCGCAGCCGGCGACGCCGTCGGCCGCGCGGGCGG
CGTCGCGCATCGCCTCGGCCTCGTCGAGCGTCGGTGCGAGCGGCTTCTCGCAGAAGACGCTGGCACCGGC
TTCGAGCGCGGCGATGGAGGGTTCGGCGTGGAGGTGGTTCGGGCCGAGGTTGTAGAACACGTCCACGTCG
TCGACCACGTCGCGCCAGTCGGTTGCGGTCGATTCGAAGCCGAAGCGGTCGGCGGCGTCGGAAAGCGCCT
CCTCGTCGCGGCCGACGATGACGGAGCGCTCCACGTCGGGCGCGTCGGGGAAGAACATCGGCAGGCGGGC
GAGCGCGTTGGAGTGCGCCTTGCCCATAAAGCGGTAGCCGAGGACGCCGATAGAGAGCGGGTCAGTCATT
GTGCCACCTCCGTGGCCGATGCAGTACCGCGAGCGAGGCCGGAGGCCGAGTCTCGCGGCGTTTTTTGGTC
CAGATTTTTCCGGTGAGCGGGTCGCGGAGCGGCCCCGAACCGGAAAAAGGTGGGCCTGAATCGGGAGCCG
AGGACGCCGATAGAGAGTTGTTCAGTCATTGGATTACTCCGCCCAGTAGGCGTCGCCCGGTTGCGTCTCG
AAGACGGCGCGCGAGAGCACGTCGACGGCCTTTTCGAGGCCCTCCGTGGACGACGTGAGCGCGTCCTCGT
GTTCGATGGAGAGCGCGCCCTCGTAGCCGACCATCCGGAGCGTCGAGACCACGTCCTTCCAGTGGCCCTC
GTCGTGGCCGTAACCGATAGAGCGGAACAGCCACGAGCGGTCGGCGGTGTCCGCGTAGGAGGCCGTGTCG
AGGACGCCCTTGATGCGCGACTCGGACTCGTAGACCTTCGTGTCCTTCGCGTGGAAGTGGTGGATGGCGT
CCGCCTCGCCGAGGAACCGAATCGCGTCGGTGATGGAGATGTCCTGCCAGTAGAGGTGCGAGGGGTCGAA
GTTCGCGCCGATGCGGTCGTTGGTCGCCTCGCGGAGCTTCAGCATCCCCGTCGGCTCGTAGACGAGCATG
TTCGGGTGCATCTCGATGGCGATGTCGACGCCGTGGTCGTCCGCGAACGCGGCGAGGTCGGACCAGTAGT
CGACGGCGACCTCCCACTGGTAGTCGTGGGCGTCGGCGTGCTCGGTCGGCCACGGCGCGGTAATCCAGTT
CGGAACCTCGTCGTTCGGACCGCCGGCGGGGAGCCCCGAGAAACAGGTAACGGTGTTCGCGTCGAGGGCG
TCCGCGAGTTCGATTGCCTCGCGGAGTTCGGTGTCCGCCTCGGCGGCCGTCTCCTCGATGGGATGCAGCG
GGTTGTTGTGCGTCGCGAGCGCGCTGATTTGCAGGTCGCGACTCTCGACCGAATCGAGGAGGTCGGCCTG
CGCGTCGTCGTCCGCGAGGACGGCGCTCCGGTCGACGTGATCCTCGCCGGGCCAGCCGCCGACGGCGAGT
TCGACGCCGTCGACGCCGATGCCCGACAGGTAGTCGAGCGCGTCGTCGAGGGGTTCGTCTCCGAGCGGGA
CGGTGAGCACTCCGATGTACAT

>Haloferax_sulfurifontis-1
ATGTACATCGGAGTGCTCACCGTCCCGCTCGGAGACGAACCCCTCGACGACGCGCTCGACTATCTGTCGG
GTATCGGCGTCGACGGCGTCGAACTCGGCGTCGGCGGCTGGCCCGGCGAGGACCACGTCGACCGAAGCGC
CCTCGTCGCGGACGAGGACGCACAGGCCGCCCTCCTCGATTCGGTCGAGAGCCGAGACCTGCAAATCAGC
GCGCTCGCCACGCACAACAACCCGCTCCACCCCGACGAGGAGACGGCCGCCGAGGCCGACACCGAACTCC
GCGAGGCAATCGAACTCGCGGACGCCCTCGACGTGAACACCGTCACCTGTTTCTCGGGGCTCCCCGCCGG
CGGGCCGAACGACGAGGTGCCGAACTGGATTACCGCGCCGTGGCCGACCGAGCACGCCGACGCCCACGAC
TACCAGTGGGAGGTCGCCGTCGACTACTGGTCCGACCTCGCCGCCTTCGCCGACGACCACGGCGTCGACA
TCGCCATCGAGATGCACCCGAACATGCTCGTCTACGAGCCGACGGGGATGCTGAAACTCCGCGAGGCGAC
GAACGAGCGCGTCGGCGCGAACTTCGACCCCTCGCACCTCTACTGGCAGGACATCTCCATCACCGACGCG
ATTCGGTTCCTCGGCGAGGAGGACGCCATCCACCACTTCCACGCGAAGGACACGAAGGTCTACGAGTCCG
AGTCGCGCATCAAGGGCGTCCTCGACACGACCTCCTACGCGGACACCGCCGACCGCTCGTGGCTGTTCCG
CTCTATCGGCTACGGCCACGACGAGGGCCACTGGAAGGACGTGGTCTCGACGCTCCGGATGGTCGGCTAC
GAGGGCGCGCTCTCCATCGAACACGAGGACGCGCTCACGTCGTCTAAGGAGGGCCTCGAAAAGGCCGTCG
ACGTGCTCTCGCGCGCCGTCTTCGAGACGCAACCCGGCGACGCCTACTGGGCGGAGTAATTCATGACTGA
CAAACTTTCCGTCGGCGTCCTCGGTTACCGCTTCAGGCCCACCTTTTTCCGGTTCGGGGCCGCGTCGCGA
CCCGCTCACCCCAAAAATATGGACCAAAAACTGCCGCGAGACTCGGCCTCCGGCCTCGCTCGCGGTACCG
CATCGGGCACGGAGGTGGCGCAATGACTGAACCACTCACCGTCGGCGTCCTCGGTTACCGATTCATGGGG
AAGGCGCACTCCAACGCGCTCGCCCGCCTGCCGATGTTCTTCCCCGACGCGCCCGACGTGGAGCGCTCGG
TCATCGTCGGCCGCGACGAGGAGGCGCTTTCCGACGCCGCCGACCGCTTCGGCTTCGAATCGACGGCGAC
CGACTGGCGCGACGTGGTCGACGACGTGGACGTGTTCTACAACCTCGGGCCGAACCACCTCCACGCCGAG
CCCTCTATCGCCGCGCTCGAAGCCGGTGCCAGCGTCTTCTGCGAGAAGCCGCTCGCGCCGACGCTCGACG
AGGCCGAGGCGATGCGCGACGCCGCCCGCGCGGCCGACGGCGTCGCCGGCTGTGCGTTCAACTACCGGTT
CGTGCCCGCAATCCGGTACGCGAAGGGACTCATCGAGGACGGCGAACTCGGCGATATTCGACACGTCCGC
GGGCGCTACTTACAGGACTGGCTCGTCGACGCCGACGCGCCGTGGACGTGGCGCATGGACGAAGACGCCG
CCGGCTCCGGCGCGCTCGGCGACCTCGGCGCGCACACGGTCGACCTCGTTCGGTTCCTCGTCGGCGACCG
CGCCGGCGACATCGAACGCCTCTCGGGGCATCTCCAGACGTTCGTCGACGAGCGACCCGTCCCCGGCACG
GACGAGTACAAGCCCGTCACCGTCGACGACGCCTACACCGCGCAGGCCGAGTTCGAAAACGGCGCGGTCG
GGAGCTTCGAGGCGTCTCGATTCGCCGACGGCCACAAGAACGACCACACCATCGAGATTCACGGCTCCGA
GGGAAGCCTGCAGTTCTCGCTCGAACGCCTCAACGAACTGGAGGTGAAAACCGGCGACGCCCGCGGCTAC
GAGACGGTGCTCGTCACCGACGAGACCGACCCCTACCTCGACCACTGGTGGCCGCCGGGCCACGTCCTCG
GCTGGGAGCACACGTTCGTCCACGAGAACTACGAGTTCCTGTCGACGGTCGCCGAGGGCGGCGACTTCTC
GCCGTCGTTCGAGGACGGCTACGAGGTCCAGAAAATCCTCGACGCCATCGAGCGCTCCGACGAGGCCGGC
GAGTGGGTCAGCCTCGGCTGA

>Haloferax_volcanii-1
TCAGCCGAGGCTGACCCACTCGCCGGCCTCGTCGGAGCGCTCGATGGCGTCGAGAATCGACTGGACCTCG
TAGCCGTCCTCGAACGACGGCGAGAAGTCGCCGCCGCCGGCGACCGCCGACAGGAACTCGTAGTTCTCGT
GGACGAACGTGTGTTCCCAGCCGAGGACGTGGCCCGGCGGCCACCAGTGGTCGAGGTAGGGGTCGTCCTC
GTCGGTGACGAGCACCGTCTCGTAGCCGCGGGCGTCGCCGGTTTTCACCTCCAGTTCGTTGAGGCGTTCG
AGCGAGAACTGAAGGCTGCCCTCGGAGCCGTGAATCTCGATGGTGTGGTCGTTCTTGTGGCCGTCTGCGA
AGCGCGAGGCCTCGAAGCTCCCGACCGCGCCGTTTTCGAACTCGGCCTGCGCGGTGTAGGCGTCGTCGAC
GGTCACGGGCCGGTACTCGTCCTCGCCGGGGACGGGCCGCTCGTCGACGAACGTCTGGAGATGCCCCGAG
ATGCGGTCGATGTCGCCGGCGCGGTCACTGACGAGGAACCGAACGAGGTCGATGGTGTGCGCGCCGAGGT
CACCGAGCGCGCCGGAGCCGGCGGCGTCTTCGTCCATGCGCCACGTCCACGGCGCGTCGGCGTCGACGAG
CCAATCCTGCAAGTAGCGCCCGCGAACGTGTCGAATCTCGCCGAGTTCGCCGCTCTCGATGAGTCGCTTG
GCGTACCGGATGGCGGGCACGAAGCGGTAGTTGAACGCACAGCCGGCGACGCCGTCGGCCGCGCGGGCGG
CGTCGCGCATCGCCTCGGCCTCGTCGAGCGTCGGCGCGAGCGGCTTCTCGCAGAAGACGCTGGCACCGGC
TTCGAGCGCGGCGATGGAGGGTTCGGCGTGGAGGTGGTTCGGGCCGAGGTTGTAGAACACGTCCACGTCG
TCGACCACGTCGCGCCAGTCGGTCGCGGTCGATTCGAAGCCGAAGCGCTCCGCCGCGTCGGAAAGCGCCT
CCTCGTCGCGGCCGACGATGACTGAGCGCTCCACGTCGGGCGCGTCGGGGAAGAACATCGGCAGGCGGGC
GAGCGCATTGGAGTGCGCCTTGCCCATGAAGCGGTAGCCGAGGACGCCGACGGAAAGTTTGTCAGTCATG
AATTACTCCGCCCAGTAGGCGTCGCCGGGTTGCGTCTCGAAGACGGCACGCGAGAGCACGTCGACGGCCT
TTTCGAGTCCCTCCGTGGACGACGTGAGCGCGTCCTCGTGTTCGATGGAGAGCGCGCCCTCGTAGCCGAC
CATGCGGAGCGTCGAGACCACGTCCTTCCAGTGGCCTTCGTCGTGGCCGTAGCCGATAGAGCGGAACAGC
CACGAGCGGTCGGCGGTGTCCGCGTAGGAGGTCGTGTCGAGGACGCCCTTGATGCGCGACTCGGACTCGT
AGACCTTCGTGTCCTTCGCGTGGAAGTGGTGGATGGCGTCCTCCTCGCCGAGGAACCGAATCGCGTCGGT
GATGGAGATGTCCTGCCAGTAGAGGTGCGAGGGGTCGAAGTTCGCGCCGATGCGCTCGTTCGTCGCCTCG
CGGAGCTTCAGCATGCCCGTGGGCTCGTAGACGAGCATGTTCGGGTGCATCTCGATGGCGATGTCCACGC
CGTGGTCGTCGGCGAACGCGGCGAGGTCCGACCAGTAGTCGACGGCGACCTCCCACTGGTAGTCGTGGGC
GTCGGCGTGCTCGGTCGGCCACGGCGCGGTAATCCAGTTCGGTACCTCGTCGTTCGGGCCGCCGGCGGGG
AGTCCCGAGAAACAGGTGACGGTGTTCACGTCGAGGGCGTCCGCGAGTTCGATGGCCTCGCGGAGTTCGG
TGTCGGCCTCGGCGGCCGTCTCCTCGACGGGGTGAAGCGGGTTGTTGTGCGTCGCGAGCGCGCTGATTTG
CAGGTCTCGGCTCTCGACCGAGTCGAGGAGGTCGGCCTGCGCGTCGTCGTCCGCGAGGACGGCGCTTCGG
TCGACGTGGTCCTCGCCGGGCCAGCCGCCGACGGCGAGTTCGACGCCGTCGACGCCGATACCGGACAGGT
AGTCGAGCGCGTCGTCGAGGGGTTCGTCTCCGAGCGGGACGGTGAGCACTCCGATGTACAT

>Haloferax_volcanii_DS2_DSM_3757-1
TCAGCCGAGGCTGACCCACTCGCCGGCCTCGTCGGAGCGCTCGATGGCGTCGAGAATCGACTGGACCTCG
TAGCCGTCCTCGAACGACGGCGAGAAGTCGCCGCCGCCGGCGACCGCCGACAGGAACTCGTAGTTCTCGT
GGACGAACGTGTGTTCCCAGCCGAGGACGTGGCCCGGCGGCCACCAGTGGTCGAGGTAGGGGTCGTCCTC
GTCGGTGACGAGCACCGTCTCGTAGCCGCGGGCGTCGCCGGTTTTCACCTCCAGTTCGTTGAGGCGTTCG
AGCGAGAACTGAAGGCTGCCCTCGGAGCCGTGAATCTCGATGGTGTGGTCGTTCTTGTGGCCGTCTGCGA
AGCGCGAGGCCTCGAAGCTCCCGACCGCGCCGTTTTCGAACTCGGCCTGCGCGGTGTAGGCGTCGTCGAC
GGTCACGGGCCGGTACTCGTCCTCGCCGGGGACGGGCCGCTCGTCGACGAACGTCTGGAGATGCCCCGAG
ATGCGGTCGATGTCGCCGGCGCGGTCACTGACGAGGAACCGAACGAGGTCGATGGTGTGCGCGCCGAGGT
CACCGAGCGCGCCGGAGCCGGCGGCGTCTTCGTCCATGCGCCACGTCCACGGCGCGTCGGCGTCGACGAG
CCAATCCTGCAAGTAGCGCCCGCGAACGTGTCGAATCTCGCCGAGTTCGCCGCTCTCGATGAGTCGCTTG
GCGTACCGGATGGCGGGCACGAAGCGGTAGTTGAACGCACAGCCGGCGACGCCGTCGGCCGCGCGGGCGG
CGTCGCGCATCGCCTCGGCCTCGTCGAGCGTCGGCGCGAGCGGCTTCTCGCAGAAGACGCTGGCACCGGC
TTCGAGCGCGGCGATGGAGGGTTCGGCGTGGAGGTGGTTCGGGCCGAGGTTGTAGAACACGTCCACGTCG
TCGACCACGTCGCGCCAGTCGGTCGCGGTCGATTCGAAGCCGAAGCGCTCCGCCGCGTCGGAAAGCGCCT
CCTCGTCGCGGCCGACGATGACTGAGCGCTCCACGTCGGGCGCGTCGGGGAAGAACATCGGCAGGCGGGC
GAGCGCATTGGAGTGCGCCTTGCCCATGAAGCGGTAGCCGAGGACGCCGACGGAAAGTTTGTCAGTCATG
AATTACTCCGCCCAGTAGGCGTCGCCGGGTTGCGTCTCGAAGACGGCACGCGAGAGCACGTCGACGGCCT
TTTCGAGTCCCTCCGTGGACGACGTGAGCGCGTCCTCGTGTTCGATGGAGAGCGCGCCCTCGTAGCCGAC
CATGCGGAGCGTCGAGACCACGTCCTTCCAGTGGCCTTCGTCGTGGCCGTAGCCGATAGAGCGGAACAGC
CACGAGCGGTCGGCGGTGTCCGCGTAGGAGGTCGTGTCGAGGACGCCCTTGATGCGCGACTCGGACTCGT
AGACCTTCGTGTCCTTCGCGTGGAAGTGGTGGATGGCGTCCTCCTCGCCGAGGAACCGAATCGCGTCGGT
GATGGAGATGTCCTGCCAGTAGAGGTGCGAGGGGTCGAAGTTCGCGCCGATGCGCTCGTTCGTCGCCTCG
CGGAGCTTCAGCATGCCCGTGGGCTCGTAGACGAGCATGTTCGGGTGCATCTCGATGGCGATGTCCACGC
CGTGGTCGTCGGCGAACGCGGCGAGGTCCGACCAGTAGTCGACGGCGACCTCCCACTGGTAGTCGTGGGC
GTCGGCGTGCTCGGTCGGCCACGGCGCGGTAATCCAGTTCGGTACCTCGTCGTTCGGGCCGCCGGCGGGG
AGTCCCGAGAAACAGGTGACGGTGTTCACGTCGAGGGCGTCCGCGAGTTCGATGGCCTCGCGGAGTTCGG
TGTCGGCCTCGGCGGCCGTCTCCTCGACGGGGTGAAGCGGGTTGTTGTGCGTCGCGAGCGCGCTGATTTG
CAGGTCTCGGCTCTCGACCGAGTCGAGGAGGTCGGCCTGCGCGTCGTCGTCCGCGAGGACGGCGCTTCGG
TCGACGTGGTCCTCGCCGGGCCAGCCGCCGACGGCGAGTTCGACGCCGTCGACGCCGATACCGGACAGGT
AGTCGAGCGCGTCGTCGAGGGGTTCGTCTCCGAGCGGGACGGTGAGCACTCCGATGTACATATCAACCAC

>Halogeometricum_borinquense-1
TCAGAGCGAAACCCATTCGCCGCTGTCGTCCGACCGCTCGATTGCGTCCAGAATCTGCTGGACTGCGTAC
CCAGCCTCGAAGGAGGGAGAGAACGCCACCCCGTCGCGGATGGCCGAAAGGAATTCGTAGTTTTCGTGGA
CGAACGTGTGTTCCCAGCCGAGAACGTGTCCCGGTGGCCACCAGTGGTCGAGGTACGGGTCGTCCGCGTC
GGTCATGAGAATCGTTTCGTAGCCCCGATGGTCGGCACCTTTGTACTCCAGTTCGTTCAGCCGTTCGAGT
GAGAACCGTAGACTCCCCTCGGAGCCGTGAATCCGGATCGTGTGGTCGTTTTTGTGCCCATCGGCGACGC
GTGACGCCTCAAACGTTCCCATCGCACCGTTCTCGAACGTCGCCTGCGCGGAGTAGGCGTCGTCAACCGT
CACCGGTCGCGTTTCGTCTGTTCCCTCGACGGGTCGCTCTGCTACGAACGTCTGCAAATTCCCGGAGATA
CGTTCGATGTCACCCGCGACATCACCGACGAGGAAGCGTGCGAGGTCGATTGTATGCGCGCCGAGGTCGC
CCAACGCGCCGCTTCCGGCGAGTTTCGCATCGTTCCGCCACGACCACGGAGCGTCAGCGTCTGTTAGCCA
ATCCTGCATGTAGCTCCCGCGGACGTGACGAATCTCGCCGAGTGTTCCGTCGTCGATCAGTCCCTTCGCG
TATTGAATCGCCGGGACAAACCGGTAGTTGAAGGCACATCCGGCGATGGCGTCGGAGTCGGCGGCGGCAT
CACGCATCTTCTCGGCCTCGTCCAGCGTCGGCGCGAGCGGTTTCTCGCAGAAGACTGGCGTGTCGGCCTT
CAGCGCGGCAATGGATGGCTCCGCGTGGATGTGGTTCGGTCCGAGGTTGTAGAAGGCGTCAACTTCGTCT
ACGACCGATTCCCAGTCCGTCGCGGTGTGTTCGAAGCCGAGTTCGTCGGCGGCGCTGGCGAGCGCCTCCT
CGTCGCGGCCGATGAGCGTGTGGCGGTGGACATCGGGCGCGTCGGGGAAGAACATCGGGAGACGCGCGAG
CGCGTTCGAGTGCGCCTTACCCATGAACCGGTAGCCGAGGACGGCGACGTTGAGCGTCATAGTGAGCGGT
TCTCACGGCGACGGCTTAGCGTTTCATGTCCAGCAACCTTTTGCGACGGTCCGCTCTCCTCCATTGAGGA
GATACACTGTATCCCGAAAAACTGCTGACGAGTCTCTGAGACAGACTACTCTGCCCAGTAGGCCTCGCCG
GGTTTGGTGTCGAAGACCGCGCGTCCGAGTACATCCACTGCCTTTTCGAGGCCCTCTCTGGACGAGGTGA
GCGAGTCCTCGTGTTCGATGGAAAGTGCGCCCTCGTAGCCGACCATTCTGAGCGTCGAGACCACGTCCTT
CCAGTGACTTTCGCCGTGACCGTAGCCGATAGAGCGGAACAGCCACGAGCGGTTCGGTTCGTCGGCGTAG
TCGGTGGTGTCGAGGACGCCTTTGATGCGCGACTTGGGTTCGTACACTTTCGTGTCCTTCGCGTGGAAAT
GGTGAATCGCATCTTCCGTACCGAGGAACCGAATCGCGTCGGTCACCTCGATTCCCTGCCAGTAAAGGTG
CGAGGGGTCGAAGTTCGCGCCGATTCGGTCGTTGGTCGCTTCGCGCAGTTTCAGCATCCCCGTCGGTTCG
TAGACGAGCATGTTCGGGTGCATCTCGATGGCCATATCGACGCCGTGGTCGTCGGCAAATTCGGCGAGGG
CAGACCAGTACTCGATTGCGACATCCCATTGGTACTCGTGGGCGTCGGCGTGCTCGGTCGGCCACGGGGC
CGTGATCCAGTTCGGCACCTCGTCGTTCGGGCCGCCCGCCGGAAGCCCCGAAAAGCAGGTGACGGTGTTT
ACATCTAACTGCGCGGCCAGTTCGATGGCTTCGCGGAGTTCGGTGTCCGCTTCCTCGGCCGTCTCCTCGT
CCGGATGCAGCGGGTTGTTGTGCGTGGCGAGCGCGCTCACCTGCATGTCGTGTTCGTCTAACAGGTCGTG
CAGTTGCGCCTGCTTGGACTCGTCGCCGAGGTACGCACGCCTGTCGAGATGGTCGTCGCCCGGAAAACCG
CCGACACCGATCTCGACGCCCTGAACGCCGATATCGTCCAGATACGAGAGCGCGTCGGCGAGCGATTCGC
CACCGAGCGGAACGGTGAGTACGCCGATGTACAT

>Halogeometricum_borinquense_DSM_11551-1
TCAGAGCGAAACCCATTCGCCGCTGTCGTCCGACCGCTCGATTGCGTCCAGAATCTGCTGGACTGCGTAC
CCAGCCTCGAAGGAGGGAGAGAACGCCACCCCGTCGCGGATGGCCGAAAGGAATTCGTAGTTTTCGTGGA
CGAACGTGTGTTCCCAGCCGAGAACGTGTCCCGGTGGCCACCAGTGGTCGAGGTACGGGTCGTCCGCGTC
GGTCATGAGAATCGTTTCGTAGCCCCGATGGTCGGCACCTTTGTACTCCAGTTCGTTCAGCCGTTCGAGT
GAGAACCGTAGACTCCCCTCGGAGCCGTGAATCCGGATCGTGTGGTCGTTTTTGTGCCCATCGGCGACGC
GTGACGCCTCAAACGTTCCCATCGCACCGTTCTCGAACGTCGCCTGCGCGGAGTAGGCGTCGTCAACCGT
CACCGGTCGCGTTTCGTCTGTTCCCTCGACGGGTCGCTCTGCTACGAACGTCTGCAAATTCCCGGAGATA
CGTTCGATGTCACCCGCGACATCACCGACGAGGAAGCGTGCGAGGTCGATTGTATGCGCGCCGAGGTCGC
CCAACGCGCCGCTTCCGGCGAGTTTCGCATCGTTCCGCCACGACCACGGAGCGTCAGCGTCTGTTAGCCA
ATCCTGCATGTAGCTCCCGCGGACGTGACGAATCTCGCCGAGTGTTCCGTCGTCGATCAGTCCCTTCGCG
TATTGAATCGCCGGGACAAACCGGTAGTTGAAGGCACATCCGGCGATGGCGTCGGAGTCGGCGGCGGCAT
CACGCATCTTCTCGGCCTCGTCCAGCGTCGGCGCGAGCGGTTTCTCGCAGAAGACTGGCGTGTCGGCCTT
CAGCGCGGCAATGGATGGCTCCGCGTGGATGTGGTTCGGTCCGAGGTTGTAGAAGGCGTCAACTTCGTCT
ACGACCGATTCCCAGTCCGTCGCGGTGTGTTCGAAGCCGAGTTCGTCGGCGGCGCTGGCGAGCGCCTCCT
CGTCGCGGCCGATGAGCGTGTGGCGGTGGACATCGGGCGCGTCGGGGAAGAACATCGGGAGACGCGCGAG
CGCGTTCGAGTGCGCCTTACCCATGAACCGGTAGCCGAGGACGGCGACGTTGAGCGTCATAGTGAGCGGT
TCTCACGGCGACGGCTTAGCGTTTCATGTCCAGCAACCTTTTGCGACGGTCCGCTCTCCTCCATTGAGGA
GATACACTGTATCCCGAAAAACTGCTGACGAGTCTCTGAGACAGACTACTCTGCCCAGTAGGCCTCGCCG
GGTTTGGTGTCGAAGACCGCGCGTCCGAGTACATCCACTGCCTTTTCGAGGCCCTCTCTGGACGAGGTGA
GCGAGTCCTCGTGTTCGATGGAAAGTGCGCCCTCGTAGCCGACCATTCTGAGCGTCGAGACCACGTCCTT
CCAGTGACTTTCGCCGTGACCGTAGCCGATAGAGCGGAACAGCCACGAGCGGTTCGGTTCGTCGGCGTAG
TCGGTGGTGTCGAGGACGCCTTTGATGCGCGACTTGGGTTCGTACACTTTCGTGTCCTTCGCGTGGAAAT
GGTGAATCGCATCTTCCGTACCGAGGAACCGAATCGCGTCGGTCACCTCGATTCCCTGCCAGTAAAGGTG
CGAGGGGTCGAAGTTCGCGCCGATTCGGTCGTTGGTCGCTTCGCGCAGTTTCAGCATCCCCGTCGGTTCG
TAGACGAGCATGTTCGGGTGCATCTCGATGGCCATATCGACGCCGTGGTCGTCGGCAAATTCGGCGAGGG
CAGACCAGTACTCGATTGCGACATCCCATTGGTACTCGTGGGCGTCGGCGTGCTCGGTCGGCCACGGGGC
CGTGATCCAGTTCGGCACCTCGTCGTTCGGGCCGCCCGCCGGAAGCCCCGAAAAGCAGGTGACGGTGTTT
ACATCTAACTGCGCGGCCAGTTCGATGGCTTCGCGGAGTTCGGTGTCCGCTTCCTCGGCCGTCTCCTCGT
CCGGATGCAGCGGGTTGTTGTGCGTGGCGAGCGCGCTCACCTGCATGTCGTGTTCGTCTAACAGGTCGTG
CAGTTGCGCCTGCTTGGACTCGTCGCCGAGGTACGCACGCCTGTCGAGATGGTCGTCGCCCGGAAAACCG
CCGACACCGATCTCGACGCCCTGAACGCCGATATCGTCCAGATACGAGAGCGCGTCGGCGAGCGATTCGC
CACCGAGCGGAACGGTGAGTACGCCGATGTACAT

>Halorubrum_aidingense-1
GTGCGCCGGCGGCGACGGGTGAGATCCCCCGCGAGCCGAATCCCCCGAATATTTATTCGGGTTGTTGTAA
TACGTTCGATCATGGACATCGGCGTGTTAACCGTCCCCTTAGGCGGCGAATCGATCGACGATGCGGTCGC
GTACCTCGAGGAAATCGGCGTCGACGCCGTCGAGCTCGGCGTCGGCGGCTGGCCCGGCGAGGACCACGTC
GACCGCGAGGCGACGCTCGACGACGCGGACGCGCAGGCGGCGCTGCTCGACTTGCTCGACGGGCACGACC
TCCGGATCTCCGCGCTCGCGACCCACAACAACCCCCTGCATCCCGACGAGGAGCGGGCCGCGGAAGCCGA
CCGAGAGCTTCGCGAGGCGATCGAGCTGGCCGATCAGCTCGACGTGGGAACGGTCACCTGTTTCTCGGGG
CTGCCCGCGGGGGCGCCCGGCGACTCGACGCCCAACTGGATCACGGCGCCGTGGCCGAGCGAGCACGCCG
ACGCCCACGCCTACCAGTGGGACGAGGTCGCGATCCCGTACTGGCGCGACCTGGCCGCTCACGCCGAGGA
CCACGGCGTCGACGTCGCCATCGAGATGCACCCGAACATGCTCGTCTACGAGCCCACCGGCATGCTCGCG
CTGCGGGAGGCGACCAACGAGCGGATCGGCGCCAACTTCGACCCCTCGCACCTCTACTGGCAGGGGATCG
ACGTGACGGAGGCGATCCGCTTTTTGGGCGCACACGACGCGATCCACCACGTCCACGCCAAGGACACGAA
AGTGTACGACGCGAACGCGCGCGTGAAGGGCGTGCTCGACACGACCGGCTACACCGAGGAGGCCGACCGC
TCGTGGCTGTTCCGGTCGATCGGCTACGGCCACGACGAGGCTCACTGGAAGGACGTCGTCTCGACGCTCC
GGATGGTCGGCTACGAGGGCGCGCTCTCCATCGAACACGAGGACTCGCTCACCTCCTCGCGGGAGGGACT
GGAGAAGGCGGTCGACGTGCTCGACCGCGCGGTCTTCGAGACGCGACCGGGCGACGCGTACTGGGCGGAG
TAAGCGGCGGACACACCAATGACACAGCAACCACTCAAAATCGGCGTGCTGGGGTATCGGTTCATGGGCA
AGGCGCACGCAAACGCGCTCGCGAGACTCCCGATGTTCTTCCCGGACGCGCCCGACATCGAGCGGCACAC
GCTCGTCGGGCGCGACGAGGAGGCCTTAGCGGAGGCGGCCGAGCGGTTCGGCTTCGCGCACACGGCGACC
GACTGGGAGGACGCGCTCGAGGAGGTGGACGTCTTCTACAACCTCGGGCCGAACCACGTCCACGCGGAGC
CGTCGATCGCCGCCCTCGAAGCGGGCGTCCCCGTCCTCTGTGAGAAGCCGCTCGCGCCGACGCTGGAGGA
GGCGGGAGCGATGCGCGACGCCGCGGCCGACGCCGACGTACCGACTGGGACCGCGTTCAACTACCGGTTC
GTCCCGGCGATCCGGTACGCGAAGGGGCTGATCGAAGACGGCGAGCTCGGCGAGATCCGGCAGGTTCGCG
GGCGGTACCTCCAAGACTGGCTCGTCGACCCCGAGGCGCCGTGGGCGTGGCGAATGGACGCCGACCTCGC
GGGGTCCGGCGCGCTCGGCGACCTCGGCGCGCACACGATCGACCTCGCGGACTTCCTCGTCGGCGACGAG
GTCGGCGAGATCGACCGCGTCTCGGGGCACCTCGAAACGTTCGTCGACGAGCGGCCGGTGTACGACGACG
ACGGCGCTGTCGACGAACACCGCGACGTGACCGTCGACGACGCCTACACGGCGCAGGTCGCCTACGAGTC
CGGCGCGATGGGGAGCTTCGAGGCGACTCGGTTCGCGACCGGGCACAAGAACGACCACACGATCGAGGTG
CACGGCTCGGAGGGGAGCCTGAAGTTCTCCTTAGAGCGACTCAACGAGTTGGAGGTGCTCAGCGGGGACG
CCCGCGGCTACGAGACGGTGCTCGTCACCGACGAGACGGATCCGTACGTCGACCACTGGTGGCCCCCGGG
CCACGTGATCGGCTGGGAACACACGTTCGTCCACGAGAACTACGAGTTCCTCACCGCCGTCGCCGAGGGC
GGCGAGTTCGAACCCTCGTTCGCGGACGGCTACGACGTCCAGCGCGTCCTCGACGCCATCGAGGAGTCCG
ACGAACGCGGAGCGTGGGTGTCGCTCGACTGA

>Halorubrum_arcis-1
CTACTCGACCGCGACCCACTCCCCGCGCTCGTCGGCGCGCTCGACCGCCGCGAGCGCGCGCTGGACCTCG
TACCCCTCTTCGAACGACGGCTCGAACGACCGGCCCTCGGCGACCGCCGAGAGGAACTCGTAGTTCTCGT
GCACGAACGTGTGCTCCCACCCGATCACGTGCCCGGGGGGCCACCAGCGGTCGACGTACGGGTCCGACTC
CTCGGTCACCAGCACCGTCTCGTAGCCGCGGTTTCCCTCGCGGAGCACCTCCAGTTCGTTCAGCCGCTCC
AGGGAGAACCTCAAGCTTCCCTTCGATCCGTGGACCGCGATCGTGTGGTCGTTCTTGTGCCCCTCGGCGA
CGCGGCTCGCCTCGAAGCTCCCGGTCGCGCCCGACTCGTAGGCGACCTGCGCGTCGTACGCGTCGTCGAC
CGTCACGTCGCGGTACTCCTCTATCTCCCCCTCGTCGTCGTAGACGGGCCGCTCGTCGACGAACGTCGTT
AGCTGTCCCGAGACGCGGTCGATCCCGCCGACAGCGTCGCCGACGAGGAAGTTCGCGAGGTCGATCGTGT
GCGCGCCGAGGTCGCCGAGCGCGCCCGATCCGGCCATCTCGGCGTCCATCCGCCACGCCCACGGCGCCTC
AGGGTCGACGAGCCAGTCCTGGAGGTACCGCCCGCGGACCTGCCGGATATCGCCGAGCTCCCCGTCCTCT
ATCAGCCCCTTCGCGTAGCGGATCGCGGGGACGAAGCGGTAGTTGAACGCGGCCCCGGCCGTGACGCCCG
TCGCGGCCGCCGCGTCGCGCATCGCCGCCGCCTCCGCCATCGTCGGCGCGAGCGGCTTCTCGCAGAGGAC
GGGGACCCCCGCTTCGAGGGCCGCGATCGACGGCTCCGCGTGGACATGGTTCGGCCCGAGGTTGTAGAAG
ACGTCCACCTCGTCGAGCGCGGCCTCCCAGTCGGTCGCGGTGTGCGAGAAGCCGAACCGCTCGGCCGCGT
CCGCGAGCGCCGCCTCGTCGCGCCCGACGAGCGTGTGGCGCTCGATCTCGGGCGCGTCCGGGAAGAACAT
CGGGAGCCGCGCCATCGCGTTCGCGTGCGCCTTGCCCATGAATCGATACCCTAGAACGCCGATCTTCAGT
GGTTCGTCGGTCATTGTCGTGAATTTTCGCGGTCGCCGCCTCACTCCGCCCAGTAGGCGTCTCCCGGCTC
CGTCTCGAAGACTGCTCGGTCCAACACGTCGACGGCCTTCTCTAACCCCTCCCGGGACGACGTGAGCGAG
TCCTCGTGTTCGATCGACAGCGCGCCCTCGTAGCCGACCATCCGGAGCGTCGAGACGACGTCCTTCCAGT
GTTCCTCGCCGTGGCCGTAGCCGATCGAGCGGAACAGCCACGAGCGGTCGGCCTCCTCGGCGTAGCCGGT
CGTGTCGAGGACGCCCTTCACCCGGGCCTTCGCGTCGTACACTTTGGTGTCCTTCGCGTGGACGTGGTGG
ATCGCGTCGCGCTCGCCGAGGAAGCGGATCGCCTCCGTCACGTCGATCCCCTGCCAGTAGAGGTGCGAGG
GGTCGAAGTTGGCCCCGATCCGGTCGTTCGTCGCCTCCCGGAGCGCGAGCAGCCCGGTCGGCTCGTAGGC
CAGCATGTTCGGGTGCATCTCGATCGCCACGTCGACGCCGTGATGCTCGGCGTGCTGCGCCAGGTCGCGC
CAGTAGGGGATCGCGACCTCGTCCCACTGGTAGTCGAGCGCGTCGGCGTGTTCCGTCGGCCACGGCGCCG
TGACCCAGTTCGGCGTCGAGTCGCCGGGCGCCCCGGCGGGGAGCCCGGAGAAGCAGGTCACCGCGTCGAC
GCCCAGCTGGTCCGCCAGCTCGATCGCCTCGCGCAGTTCGCGGTCGGCCGCCGCGGCCCGCTCTTCGTCG
GGATGGAGCGGGTTGTTGTGCGTCGCCAGCGCGGAGAGCCGGAGGTCGTGGTCGTCGAGCAGCGCCCGGA
GGTCCTCGCGGGCCGCCGCGTCGTCCAGGAGCGCCTCGCGGTCGACGTGGTCCTCGCCGGGCCAGCCGCC
GACGCCGAGTTCGACGGCGTCGACGCCGATCCCGTCGAGGTACGCGGCAGCGTCGTCGAGCGGTTCGTCG
CCCAAGGGAACCGTTAGCACGCCGATGTCCAT

>Halorubrum_californiensis-1
TCACTCGACAGCGACCCGCTCGCCGCGCTCGTCGGATCGCTCGATCGCCGCGAGGACGCGCTGGACCTCG
TACCCGTCCTCGAACGACGGCTCGAACGATCCGCCCTCGGCGACCGCCGAGAGGAACTCGTAACTCTCGT
GAACGAACGTGTGCTCCCACCCGATCACGTGTCCGGGGGGCCACCAGCGGTCGACGTACGGGTCCGTCTC
CTCGGTGACCAGCACCGTCTCGTAGCCGCGGTTCCCCTCGCGCAGCACCTCCAGTTCGTTGAGCCGCTCC
AAGGAGAACGTCAGGCTCCCCGCCGTCCCGTGAACCGCGATCGTGTGGTCGTTCTTGTGCCCCTCGGCGA
CGCGGCTCGCCTCGAAGCTCCCCGTCGCGCCCGACTCGTAGGCGACCTGCGCGCTGTACGCGTCGTCGAC
CGTCACGTCGCGGTACTCCTCGATTACCCCTTCGTCGTCGTAGACGGGCCGTTCGTCGACGAACGTCGTC
AGCCGTCCGGAGAGGCGGTCGATCCCGCCGACCGCGTCGCCGACGAGGAAGTTCGCGAGGTCGATCGTGT
GCGCCCCGAGGTCGCCGAGCGCGCCCGACCCGGCCATGTCGGCGTCCATCCGCCACGCCCACGGCGCCTC
GGGGTCGACGAGCCAGTCCTGGAGGTAGCGCCCGCGGACCTGTCGGATCTCGCCCAGTTCGCCGTCCTCG
ATCAGCCCCTTCGCGTACCGGATCGCGGGGACGAACCGGTAGTTGAACGCGGCGCCCGCGGGCACGTCGG
CCGCGGCCGCCGCGTCGCGCATCGCCGCCGCCTCCGCCATCGTCGGCGCGAGCGGCTTCTCGCAGAGAAC
GGGAATCCCCGCTTCGAGGGCCGCGATCGACGGCTCCGCGTGGACGTGGTTCGGCCCGAGGTTGTAGAAG
ACGTCCACCTCGTCGAGCGCGGCCTCCCAGTCGGTCACGGTGTGCGAGAAGCCGAACCGCTCGGCCGCGT
CCGCGAGCGCCGCCTCGTCGCGCCCGACGAGCGTGTGTCGCTCGACCTCGGGCGCGTCCGGGAAGAACAT
CGGGAGCCGCGCCATCGCGTTCGCGTGCGCCTTGCCCATGAATCGATACCCCAGCACGCCGATCTTCAGT
GGTTCGTCGGTCATTGTCGTGGATCTCTCGGTCGTCAGCGTCTCATTCCGCCCAGTACGCGTCGCCCGGT
TCCGTCTCGAAGACGGCCCGCTCCAGCACGTCGACGGCCTTCTCCAGCCCCTCGCGCGACGACGTGAGCG
AGTCCTCGTGTTCGATCGACAGCGCGCCCTCGTAGCCGACCATCCGCAGCGTCGAGACGACATCCTTCCA
GTGTCCCTCGTCGTGGCCGTAACCGATCGAGCGGAACAGCCACGAGCGGTCGGCCTCCTCGGCGTACCCC
GTCGTGTCGAGGACGCCCTTCAGGCGGGCGTTCGCGTCGTACACCTTGGTGTCCTTCGCGTGGACGTGGT
GGATCGCGTCGCGCTCGCCGAGGAATCGGATCGCCTCCGTCACGTCTATCCCCTGCCAGTAGAGGTGCGA
GGGGTCGAAGTTGGCCCCGATCCGGTCGTTCGTCGCCTCGCGGAGGGCGAGCATGCCGGTCGGCTCGTAC
ACCAGCATGTTCGGGTGCATCTCGATGGCCACGTCGACGCCGTGATGCTCGGCGTGCTTCGCCAGGTCCC
GCCAGTACGGGATCGCGACCTCGTCCCACTGGTAGTCGAGCGCGTCGGCGTGTTCGGTCGGCCACGGCGC
CGTGACCCAGTTCGGCGTCGAGTCGCCGGGCGCCCCCGCGGGGAGCCCGGAGAAGCACGTGACCGTGTCG
ACGCCGAGCAGGTCGGCCAGTTCGATCGCCTCGCACAGTTCGCGGTCGGCCGCTGCGGCCCGCTCCTCGT
CCGGGTGGAGCGGGTTGTTGTGCGTCGCCAGCGCGGAGATCCGGAGGCCGCGGTCGTCGAGCAGCCCGAG
CAGTTCGTCGCGCGCGTCCTCGTCGCCGAGGAGGCGCTCGCGGTCGACGTGGTCCTCGCCGGGCCAGCCG
CCAACGCCGAGTTCGACGGCGTCGACGCCGATCCCGTCGAGGTACGCGGCCGCGTCGTCGATCGGTTCGC
CGCCCAAGGGGACGGTCAGCACGCCGATGTCCAT

>Halorubrum_coriense-1
ATGGACATCGGCGTGCTGACGGTTCCCCTCGGCGGCGAACCGATCGACGACGCGGCCGCGTCCCTCGCCG
AAATCGGGGTCGACGCCGTCGAACTCGGCGTCGGCGGGTGGCCCGGCGAGGATCACGTCGACCGCGGAGC
GCTCCTCGACGACGCGGCCGGGCGGGAGGAGTTACTCGCGCTGCTCGACGGTCACGGGCTCCGGATCTCC
GCGCTGGCGACGCACAACAACCCGCTCCACCCGGACGAGGAGCGGGCCGCGACCGCCGACCGCGAGCTGC
GCGAGGCGATCGAACTGGCCGACCTGCTCGGCGTCGACACGGTCACGTGCTTCTCCGGGCTCCCCGCGGG
CGCGCCCGGCGACTCGACGCCGAACTGGGTGACAGCGCCGTGGCCGACCGAACACGCCGACGCGCTCGAC
TACCAGTGGGACGAGGTCGCGATCCCGTACTGGCGCGACCTGGCGGCGCACGCCGACCGCCACGGCGTCG
ACGTGGCGATCGAGATGCACCCGAACATGCTGGTGTACGAGCCGACCGGGCTGGTCGCGCTCCGCGAGGC
GACCGGCGAGCGGATCGGGGCCAACTTCGACCCCTCGCACCTCTACTGGCAGGGGATCGACGCGACGGAG
GCGATCCGGTTCCTCGGCGCGCGCGACGCGATCCACCACGTCCACGCGAAGGACACCAAGGTGTACGACG
CGAACGCCCGCGTGAAGGGCGTCCTCGACACGACGGGCTACGCCGATGAGGCCGACCGCTCGTGGCTGTT
CCGCTCGATCGGGTACGGACACGGCGAGGGACACTGGAAGGACCTCGTCTCGACGCTCCGGATGGTCGGC
TACGAGGGCGCGCTCTCCATCGAACACGAGGACTCGCTCACGTCGGCGCGGGAGGGGTTAGCGAAGGCCG
TCGACGTGCTGGAGCGGGCCGTCTTCGAGACGGAACCGGGCGAGGCGTACTGGGCGGAGTAAGGCGGCGA
CCGCGGAACGCAGACAATGACACCGGAACCACTGAAGATCGGCGTACTGGGGTATCGCTTCATGGGCAAG
GCGCACGCGAACGCGCTCGCGCGCCTGCCGATGTTCTTCCCGGACGCGCCCGAGGTCGAGCGGCACATGC
TCGTCGGGCGCGACGAGGAAGCGCTCGCGGACGCGGCCGACCGGCTCGGCTTCGCGCACACCGCGACCGA
CTGGGAGGCGGCGCTCGACGAGGTGGACGTCTTCTACAACCTCGGCCCGAACCACGTCCACGCGGAGCCG
TCGATCGCGGCGCTCGAAGCCGGGGTTCCCGTCCTCTGCGAGAAGCCGCTCGCGCCGACGCTGGAGGCGG
CGGCGGCGATGCGCGACGCGGCGGCCGCGACGGGCGTCACCGCCGGGACCGCGTTCAACTACCGGTTCGT
GCCCGCGATCCGGCACGCGAAGGGGCTGATCGAGGACGGCGAGCTGGGCGAGATCCGACAGGTCCGCGGG
CGCTACCTCCAGGACTGGCTCGTCGACCCCGAAGCGCCGTGGGCGTGGCGAATGGACGCGGAGCTGGCCG
GGTCCGGCGCGCTCGGCGACCTCGGCGCGCACACGATCGACCTCGCGAGGTTCCTCGTCGGCGACCGGGT
CGGCGGGGTCGACCGCGTCTCGGGGCAGCTGACGACGTTCGTCGACGAGCGGCCCGTCTACGACGAGGAC
GGCGGGGTCGCGGAGTACCGGGACGTGACCGTCGACGACGCATACAGCGCGCAGGTCGAGTACGAGTCGG
GCGCGACCGGGACCTTCGAGGCGAGTCGGGTCGCGGCGGGCCACAAGAACGACCACGCGATCGCGGTCCA
CGGGACGGCGGGGAGCCTGACGTTCTCACTTGAGCGGCTCAACGAACTGGAGGTGTTACGCGCGGGGAAC
CGCGGCTACGAGACGGTGCTGGTCACCGAGGAGTCGGACCCGTACGTCGACCGCTGGTGGCCCCCCGGAC
ACGTGATCGGGTGGGAGCACACGTTCGTCCACGAGAGCTACGAGTTCCTCTCGGCGGTGGCCGACGGCGG
CGCGTTCGAACCGTCGTTCGAGGACGGGTACGCGGTCCAGCGGATCCTCGCGGCGGTCGAACGCGCAGAC
GAGCGGGGCGAGTGGGTCGCGGTCGAGTGA

>Halorubrum_distributum-1
ATGGACATCGGCGTGCTAACGGTTCCCTTGGGCGACGAACCGCTCGACGACGCGGCCGCGTACCTCGACG
GGATCGGCGTCGACGCCGTCGAACTCGGCGTCGGCGGCTGGCCCGGCGAGGACCACGTCGACCGCGAGGC
GCTCCTGGACGACGCGGCGGCCCGCGAGGACCTCCGGGCGCTGCTCGACGACCACGACCTCCGGATCTCC
GCGCTGGCGACGCACAACAACCCGCTCCATCCCGACGAGGAGCGGGCCGCGGCGGCCGACCGCGAGCTGC
GCGAGGCGATCGAGCTGGCGGACCAGCTGGGCGTCGACGCGGTGACCTGCTTCTCCGGGCTCCCCGCCGG
GGCGCCCGGCGACTCGACGCCGAACTGGGTCACGGCGCCGTGGCCGACGGAACACGCCGACGCGCTCGAC
TACCAGTGGGACGAGGTCGCGATCCCCTACTGGCGCGACCTGGCGCAGCACGCCGAGCATCACGGCGTCG
ACGTGGCGATCGAGATGCACCCGAACATGCTGGCCTACGAGCCGACCGGGCTGCTCGCGCTCCGGGAGGC
GACGAACGACCGGATCGGGGCCAACTTCGACCCCTCGCACCTCTACTGGCAGGGGATCGACGTGACGGAG
GCGATCCGCTTCCTCGGCGAGCGCGACGCGATCCACCACGTCCACGCGAAGGACACCAAAGTGTACGACG
CGAAGGCCCGCGTGAAGGGCGTCCTCGACACGACCGGCTATGCCGAGGAGGCCGACCGCTCGTGGCTGTT
CCGCTCGATCGGCTACGGCCACGGCGAGGAACACTGGAAGGACGTCGTCTCGACGCTCCGGATGGTCGGC
TACGAGGGCGCGCTGTCGATCGAACACGAGGACTCGCTCACGTCGTCCCGGGAGGGGTTAGAGAAGGCCG
TCGACGTGCTCGACCGCGCGGTGTTCGAGACGGAACCGGGCGACGCCTACTGGGCGGAGTGAGGCGGCGA
CCGCGATAATCCATGACAATGACCGACGAACCACTGAAGATCGGCGTTCTGGGGTATCGATTCATGGGCA
AGGCGCACGCGAACGCGATGGCGCGGCTCCCGATGTTCTTCCCGGACGCGCCCGAGATCGAGCGCCACAC
GCTCGTCGGGCGCGACGAGGCGGCGCTCGCGGACGCGGCCGAGCGGTTCGGCTTCTCGCACACCGCGACC
GACTGGGAGGCCGCGCTCGACGAGGTGGACGTCTTCTACAACCTCGGGCCGAACCACGTCCACGCGGAGC
CGTCGATCGCGGCCCTCGAAGCGGGGGTCCCCGTCCTCTGCGAGAAGCCGCTCGCGCCGACGATGGCGGA
GGCGGCGGCGATGCGCGACGCGGCGGCCGCGACGGGCGTCACGGCCGGGGCCGCGTTCAACTACCGCTTC
GTCCCCGCGATCCGCTACGCGAAGGGGCTGATAGAGGACGGGGAACTCGGCGATATCCGGCAGGTCCGCG
GGCGGTACCTCCAGGACTGGCTCGTCGATCCCGAGGCGCCGTGGGCGTGGCGGATGGACGCCGAGATGGC
CGGATCCGGCGCGCTCGGCGACCTCGGCGCGCACACGATCGACCTCGCGAACTTCCTCGTCGGCGACGCT
GTCGGCGGGATCGACCGCGTCTCGGGACAGCTGACGACGTTCGTCGACGAGCGGCCCGTCTACGACGACG
AGGGGGAGATAGAGGAGTACCGCGACGTGACGGTCGACGACGCGTACGACGCGCAGGTCGCCTACGAGTC
GGGCGCGACCGGGAGCTTCGAGGCGAGCCGCGTCGCCGAGGGGCACAAGAACGACCACACGATCGCGGTC
CACGGATCGAAGGGAAGCTTGAGGTTCTCCCTGGAGCGGCTGAACGAACTGGAGGTGCTCCGCGAGGGGA
ACCGCGGCTACGAGACGGTGCTGGTGACCGAGGAGTCGGACCCGTACGTCGACCGCTGGTGGCCCCCCGG
GCACGTGATCGGGTGGGAGCACACGTTCGTACACGAGAACTACGAGTTCCTCTCGGCGGTCGCCGAGGGC
CGGCCGTTCGAGCCGTCGTTCGAAGAGGGGTACGAGGTCCAGCGCGCGCTCGCGGCGATCGAGCGCGCCG
ACGAGCGCGGGGAGTGGGTCGCGGTCGAGTAG

>Halorubrum_distributum_JCM_10118-1
CTACTCGACCGCGACCCACTCCCCGCGCTCGTCGGCGCGCTCGATCGCCGCGAGCGCGCGCTGGACCTCG
TACCCCTCTTCGAACGACGGCTCGAACGGCCGGCCCTCGGCGACCGCCGAGAGGAACTCGTAGTTCTCGT
GTACGAACGTGTGCTCCCACCCGATCACGTGCCCGGGGGGCCACCAGCGGTCGACGTACGGGTCCGACTC
CTCGGTCACCAGCACCGTCTCGTAGCCGCGGTTCCCCTCGCGGAGCACCTCCAGTTCGTTCAGCCGCTCC
AGGGAGAACCTCAAGCTTCCCTTCGATCCGTGGACCGCGATCGTGTGGTCGTTCTTGTGCCCCTCGGCGA
CGCGGCTCGCCTCGAAGCTCCCGGTCGCGCCCGACTCGTAGGCGACCTGCGCGTCGTACGCGTCGTCGAC
CGTCACGTCGCGGTACTCCTCTATCTCCCCCTCGTCGTCGTAGACGGGCCGCTCGTCGACGAACGTCGTC
AGCTGTCCCGAGACGCGGTCGATCCCGCCGACAGCGTCGCCGACGAGGAAGTTCGCGAGGTCGATCGTGT
GCGCGCCGAGGTCGCCGAGCGCGCCGGATCCGGCCATCTCGGCGTCCATCCGCCACGCCCACGGCGCCTC
GGGATCGACGAGCCAGTCCTGGAGGTACCGCCCGCGGACCTGCCGGATATCGCCGAGTTCCCCGTCCTCT
ATCAGCCCCTTCGCGTAGCGGATCGCGGGGACGAAGCGGTAGTTGAACGCGGCCCCGGCCGTGACGCCCG
TCGCGGCCGCCGCGTCGCGCATCGCCGCCGCCTCCGCCATCGTCGGCGCGAGCGGCTTCTCGCAGAGGAC
GGGGACCCCCGCTTCGAGGGCCGCGATCGACGGCTCCGCGTGGACGTGGTTCGGCCCGAGGTTGTAGAAG
ACGTCCACCTCGTCGAGCGCGGCCTCCCAGTCGGTCGCGGTGTGCGAGAAGCCGAACCGCTCGGCCGCGT
CCGCGAGCGCCGCCTCGTCGCGCCCGACGAGCGTGTGGCGCTCGATCTCGGGCGCGTCCGGGAAGAACAT
CGGGAGCCGCGCCATCGCGTTCGCGTGCGCCTTGCCCATGAATCGATACCCCAGAACGCCGATCTTCAGT
GGTTCGTCGGTCATTGTCATGGATTATCGCGGTCGCCGCCTCACTCCGCCCAGTAGGCGTCGCCCGGTTC
CGTCTCGAACACCGCGCGGTCGAGCACGTCGACGGCCTTCTCTAACCCCTCCCGGGACGACGTGAGCGAG
TCCTCGTGTTCGATCGACAGCGCGCCCTCGTAGCCGACCATCCGGAGCGTCGAGACGACGTCCTTCCAGT
GTTCCTCGCCGTGGCCGTAGCCGATCGAGCGGAACAGCCACGAGCGGTCGGCCTCCTCGGCATAGCCGGT
CGTGTCGAGGACGCCCTTCACGCGGGCCTTCGCGTCGTACACTTTGGTGTCCTTCGCGTGGACGTGGTGG
ATCGCGTCGCGCTCGCCGAGGAAGCGGATCGCCTCCGTCACGTCGATCCCCTGCCAGTAGAGGTGCGAGG
GGTCGAAGTTGGCCCCGATCCGGTCGTTCGTCGCCTCCCGGAGCGCGAGCAGCCCGGTCGGCTCGTAGGC
CAGCATGTTCGGGTGCATCTCGATCGCCACGTCGACGCCGTGATGCTCGGCGTGCTGCGCCAGGTCGCGC
CAGTAGGGGATCGCGACCTCGTCCCACTGGTAGTCGAGCGCGTCGGCGTGTTCCGTCGGCCACGGCGCCG
TGACCCAGTTCGGCGTCGAGTCGCCGGGCGCCCCGGCGGGGAGCCCGGAGAAGCAGGTCACCGCGTCGAC
GCCCAGCTGGTCCGCCAGCTCGATCGCCTCGCGCAGCTCGCGGTCGGCCGCCGCGGCCCGCTCCTCGTCG
GGATGGAGCGGGTTGTTGTGCGTCGCCAGCGCGGAGATCCGGAGGTCGTGGTCGTCGAGCAGCGCCCGGA
GGTCCTCGCGGGCCGCCGCGTCGTCCAGGAGCGCCTCGCGGTCGACGTGGTCCTCGCCGGGCCAGCCGCC
GACGCCGAGTTCGACGGCGTCGACGCCGATCCCGTCGAGGTACGCGGCCGCGTCGTCGAGCGGTTCGTCG
CCCAAGGGAACCGTTAGCACGCCGATGTCCAT

>Halorubrum_hochstenium-1
TTAGACTTCGACCCACTCGCCGCGCTCGTCGGCCCGCTCGATCGCCGCGAGTACCTTCTGGACCTCGTAC
CCGTCAGCGAACGACGGCTCGAACGACCCGCCTTCCGCGACCGCCGAGAGGTACTCGTAGCTCTCGTGGA
CGAACGTGTGCTCCCACCCGATCACGTGGCCGGGGGGCCACCAGCGGTCCACGTACGGGTCCGTCTCCTC
GGTGACTAACACCGTCTCGTAGCCGCGGTTCCCCTCGCGGAGCACCTCCAGTTCGTTGAGGCGCTCCAAG
GAGAACTTCACGCTCCCCTTCGAGCCGTGGACCGCGATCGTGTGGTCGTTCTTGTGCCCCTCGGCGACCC
GCGTGGCCTCGAAGGTCCCGGTCGCGCCCGACTCGTAGGCGACCTGCGCGCTGTAGGCGTCGTCGACGGT
CACGTCGCGGTACTCCGCGACCTCGGCGTCGGCTTCGCCCGCCGCGTCGTCGTCGGCGTACACCGGGCGC
TCGTCGACGAACGTCGTCAACTGCCCGGAGACGCGGTCGATCCCCCCGACCGCCTCGCCCACGAGGAAGT
TCGCGAGGTCGATCGTGTGCGCGCCGAGGTCGCCGAGCGCGCCCGATCCGGCCATGTCGGCGTCCATCCG
CCACGCCCACGGGGCCTCCGGGTCGACGAGCCAGTCCTGGAGGTAGCGCCCGCGGACCTGTCGTATCTCG
CCGAGTTCGCCGTCCTCGATCAGTCCCTTCGCGTACCGGATCGCGGGGACGAACCGGTAGTTGAACGCGG
TGCCGGCGGTCGCGCCGGTCGCGGCCGCGGCGTCGCGCATCGCCGCGGCCTCCTCCAGCGTCGGCGCGAG
CGGCTTCTCACAGAGGACGGGGACCCCCGCTTCGAGGGCCGCGATCGACGGCTCCGCGTGGACGTGGTTC
GGGCCGAGGTTGTAGAAGACGTCCACCGCGTCTATCGCCGCCTCCCAGTCGGTCGCGGTGTGCGCGAAGC
CGAACCGGTCGGCCGCCTCTGCGAGGGCGTTTTCGTCGCGCCCGACGAGCGTGTGCCGCTCGACCTCGGG
GGCGTCCGGGAAGAACATCGGGAGGCGCGCGAGCGCGTTCGCGTGCGCTCTTCCCATGAATCGATACCCC
AGCACGCCGACCTTCTGTGTTTCATGTGTCATGTCGTGGATCTGTTGGTCGCCGCCGCCTCACTCAGCCC
AGTACGCGTCGCCCGGTTCGGTCTCGAAGACGGCTCGGTCCAACACGTCGACCGCCTTCTCCAACCCCTC
GCGCGAGGAGGTGAGCGAGTCCTCGTGTTCGATCGACAGCGCGCCCTCGTAGCCGACCATCCGGAGCGTC
GAGACCACGTCCTTCCAGTGGTCCTCCCCGTGACCGTAGCCGATCGAGCGGAACAGCCACGAGCGGTCCG
CCTCGTCGGCGTACCCCGTCGTGTCGAGGACGCCCTTCACCCGCGAGTTGGACTCGTACACCCTCGTGTC
CTTGGCGTGGACGTGGTGGATCGCGTCGCGCTCGCCGAGGAAGCGGATCGCCTCGGGCACGTCGATCCCC
TGCCAGTAGAGGTGCGACGGGTCGAAGTTCGCGCCGATCCGCTCGTTCGTCGCCTCCCGGAGCGCGAGCA
TGCCGGTCGGCTCGTACACGAGCATGTTCGGGTGCATCTCGATAGCCACGTCGACGCCGTGGTGCGCGGC
GTGTTCGGCGAGGTCCGACCAGTACGGGACCGCGACCTCGTCCCACTGGTAGTCGAGCGCGTCGGCGTGT
TCGCTCGGCCACGGGGCCGTGACCCAGTTCGGCGTCGAGTCGCCCGGCGCGCCCGCGGGGAGTCCCGAGA
AGCACGTCACCGTGTCGACGCCGAGCAGGTCGGCCAGTCCGATCGCCTCGCGCAGTTCGCGGTCCGCCGT
CGCGGCCCGCTCCTCGTCGGGGTGAAGCGGGTTGTTGTGCGTCGCGAGCGCGGAGATCCGGAGCCCGTGG
TCGTCGAGAACTCCCCGGAGTTCCTGCCGCGCCGCCTCGTCGTCAAGGAGCCGCTCGCGGTCGACGTGGT
CCTGTCCGGGCCACCCGCCGACGCCGAGTTCGACGGCGTCGACGCCGAGCCCGGCGAGGTACGCGGCCGC
GTCGTCGATCGGTTCGCCGCCGAGGGGAACGGTCAAGACGCCGATGTCCAT

>Halorubrum_kocurii-1
CTACTCGACCGAGACCCACTCGCTCCGCTCGTCGGCGCGGACGATCGCGTCGAGGGTCTTCTGCACCGCG
TACCCCTGCTCGAACGACGGCTCGAACGCGCCGCCCTCGGCGACCGCGGAGAGGAACTCGTAGTTCTCGT
GGACGAAGGTGTGCTCCCAGCCGATGACGTGGCCCGGCGGCCACCAGTGGTCGACGTACGGGTCGGTCTC
GTCGGTGACGAGCACCGTCTGGTACCCGCGGTCGCCCTCGCGGAGCACCTCCAGCTCGTTGAGCCGCTCC
AAGGAGAACCTCAGGCTCCCCTTCGAGCCGTGCACCTCGATCGCGTGGTCGTTCTTGTGGCCCTCCGCGA
ACCGCGTCGCCTCGAAGCTCCCCATCGCGCCCGACTCGTAGGCGACCTGCGCGGTGTAGGCGTCGTCGAC
GGTCACGTCCCGGTGCTCCGCGACGCCGCCCTCGTCGTCGTAGACGGGCCGCTCGTCGACGAACGTCTGT
AAGTGACCGGACACGCGGTCGACCCCGCCGACCGCGTCGCCGACGAGGAAGTCCGCGAGGTCGAGTGTGT
GCGCGCCGAGGTCGCCGAGCGCCCCGGATCCCGCCATGTCGGCGTCCATCCGCCACGCCCACGGCGCCTC
GGGGTCGACGAGCCAGTCCTGGAGGTACCGCCCGCGGACCTGTCGGATCTCGCCGAGTTCGCCGTCCTCG
ATGAGCCCCTTCGCGTACCGGATCGCGGGGACGAACCGGTAGTTGAACGCGGTGCCCGCCGGTACGTCTG
CGGCGGCCGCCGCGTCGCGCATCGCTTCGGCCTCGTCGAGGGTCGGCGCGAGCGGCTTCTCACAGAGGAC
GGGGACGCCCGCTTCGAGGGCGGCGATCGACGGCTCCGCGTGGACGTGGTTCGGTCCGAGGTTGTAGAAG
ACGTCCACCTGGCCGAGGGCGTCCGCCCAGTCGGTCGCGGTGTGCGCGAACCCGAACCGCTCCGCGGCGT
CCGCGAGCGCCGCCTCGTCGCGCCCGACGAGCGTGTGGCGCTCGATCTCGGGCGCGTCCGGGAAGAACAT
CGGGAGCCGTGCGAGCGCGTTCGCGTGCGCCTTGCCCATGAATCGATACCCAAGCACGCCGATTTCGAGT
GGTTCCTGTGTCATTGGGTTGCCCTCCGTCTTACTCCGCCCAGTAGGCGTCGCCCGGTCGCGTCTCGAAG
ACTGCGCGGTCGAGCACGTCGACCGCCTTCTCTAACCCCTCCCGCGAGGAGGTGAGCGAGTCCTCGTGTT
CGATCGAGAGCGCGCCCTCGTATCCGACCATCCGGAGCGTCGAGACCACGTCCTTCCAGTGGCCCTCGTC
GTGGCCGTAGCCGATCGAGCGGAACAGCCACGAGCGGTCGGCCTCCTCGGTGTAGCCCGTCGTGTCGAGC
ACGCCCTTCACGCGCGCGTTCGCGTCGTACACCTTCGTGTCCTTCGCGTGGAAGTGGTGGATCGCGTCGC
GGTCGCCCAAAAAGCGGATCGCCTCCGTCACGTCGATCCCCTGCCAGTAGAGGTGCGAGGGGTCGAAGTT
GGCGCCGATCCGATCGTTCGTCGCCTCCCGCAGCGCGAGCAGCCCGGTCGGCTCGTACACGAGCATGTTC
GGGTGCATCTCGATGGCGACGTCGACGCCGTGGGCCTCGGCGTGGTCCGCCAGGTCCGTCCAGTACGGGA
CCGCGACCTCGTCCCACTGGTAGTCGAGCGCGTCGGCGTGTTCGGTCGGCCACGGCGCCGTGATCCAGTT
CGGCGTGGAGTCGCCGGGCGCGCCGCCGGGGAGCCCGGAGAAGCAGGTGACCGTGCCGACGTCCAACTGG
TCGGCCAGCTCGATCGCCTCGCGGAGCTCGCGGTCGGCCTCCGCGGCCCGCTCCTCGTCCGGGTGCAGGG
GATTGTTGTGGGTCGCGAGCGCGGAGATCCGGAGCCCGTGCTCGTCGAGCAGCGCTTCGAGCTCCGCCTG
CGCCGCGTCGTCGCCGAGGGTCGCCTCGCGGTCGACGTGCGCCTCGCCGGGCCACCCGCCGACGCCGAGC
TCGACCGCGTCGACGCCGATCTCGTCGAGGTACGCGACCGCGTCGTCGATCGATTCACCGCCCAAGGGAA
CGGTTAGTACACCAATGTCCAT

>Halorubrum_lacusprofundi-1
CTACTCCACCGACACCCACTCCCCGCGCTCGTCGGCGCGTTCGACCGCGTCGAGGAGTTTTTGCACCTTG
TACCCCTGTTCGAACGACGGCTCGAACTCGCCGCCCTCGGCGACCGCCGAGAGGAACTCGTAGTTCTCGT
GGACGAACGTGTGCTCCCAGCCGATGACGTGACCCGGCGGCCACCAGTGGTCGACGTACGGGTCGGTCTC
GTCGGTGACGAGCACTGTCTGGTACCCGCGGTCGTCCTCCCGGAGCACCTCCAGCTCGTTGAGCCGCTCC
AAGGAGAACTTCAAGCTCCCCTTCGAGCCGTGGATTTCGATCGCGTGGTCGTTCTTGTGGCCCTCCGCGA
ATCGGGTCGCCTCGAAGCTCCCCATCGCGCCCGACTCGTAGGCGACCTGCGCGGTGTAGGCGTCGTCGAC
GGTCACGTCGCGATACTCCTCGACGTCGCCAGCCTCGTCGTAGACGGGCCGCTCGTCGACGAACGTCTGG
AGGTGGCCCGAGACGCGATCGATCTCGCCGACCTCGTCGCCGACGAGGAAGTCCGCGAGGTCGAGCGTGT
GCGCGCCGAGGTCGCCGAGCGCGCCGGAGCCCGCCGTGTCGGCGTCCATCCGCCACGCCCACGGCGCCTC
GGGGTCGACCAGCCAGTCTTGGAGGTACCGCCCACGAACTTGTCGGATCTCGCCGAGTTCGCCGTCTTCG
ATCAGCCCCTTCGCGTACCGGATCGCGGGGATGAACCGATAGTTGAACGCGGTGCCGGCGGGCACGTCGG
CGTCGGCCGCGGCGTCGCGCATCGCCGCGGCCTCGTCGAGGGTCGGCGCGAGGGGCTTCTCACAGAGAAC
CGGAACGCCCGCTTCGAGGGCCGCGATCGACGGCTCCGCGTGAACGTGGTTCGGGCCGAGGTTGTAGAAC
ACGTCCACCTCGTCGAGCGAGTCCTCCCAGTCGGTCGCGGTGTGCGAGAATCCGAACCGCTCCGCGGCGT
CCGCGAGCGCCTCCTCGTCGCGCCCGACGAGGGTGTGCCGCTCGATGTCGGGCGCGTCTGGGAAGAACAT
CGGGAGTCGCGCGAGCGCGTTCGCGTGCGCCTTGCCCATGAAGCGGTACCCCAGTACGCCGATTCGTAGT
GGTTGCTGTGTCATTGGTTTATCCTCCGCTTACTCCGCCCAGTAGGCGTCGCCCGGTTGCGTCTCGAAGA
CGGCGCGGTCGAGCACGTCGACCGCCTTCTCTAACCCCTCCCGCGAGGAGGTCAGCGAGTCCTCGTGTTC
GATCGACAGCGCGCCCTCGTACCCGACCATCCGGAGCGTCGAGACGACGTCCTTCCAGTGGCTCTCGTCG
TGGCCGTAACCGATCGAACGGAACAGCCACGAGCGATCGCTCTCGTCGGTGTAGCTCGTCGTGTCGAGTA
CGCCCTTCACGCGCGCGTTCGCGTCGTACACCTTGGTGTCCTTCGCGTGGAAGTGGTGGATCGCGTCGTG
GTCGCCCAAAAATCGGATCGCCTCGATCACGTCGATCCCCTGCCAGTAGAGGTGCGAGGGGTCGAAGTTG
GCGCCGATCCGCTCGTTCGTGGCCTCCCGGAGCGCGAGCATGCCGGTCGGCTCGTACACGAGCATGTTCG
GGTGCATCTCGATGGCGACATCCACCCCGTGGTGGTCTGCGTGTTTCGCCAGATCCGTCCAGTACGGGAT
CGCGACCTCGTCCCATTGATACTCGTGGGCGTCGGCGTGTTCGCTCGGCCACGGCGCCGTGATCCAGTTC
GGCGTCGAGTCGCCCGGCGCGCCGGCAGGAAGGCCGGAGAAACAGGTGACCGTGCCCACGTCCAGCTGGT
CGGCAAGCTCGATCGCCTCGCGGAGCTCTCGGTCGGCCGCCGCGGCGCGCTCCTCGTCGGGGTGGAGGGG
GTTGTTGTGGGTCGCGAGCGCGGAGATCCGGAGGCCGTGTTCGTCGAGTAGCTCCCGAAGCTCCGCCTGC
GCCGCGTCGTCGTCGAGTATCGCCTCGCGGTCGACGTGGTCCTCGCTGGGCCACCCGCCGACGCCGAGTT
CGACGGCGTCGACGCCGATATCGTCGAGGTACGCGACCGCGTCGTCGATCGATTCGCCGCCTAAGGGGAC
GGTTAGCACACCGATGTCCAT

>Halorubrum_litoreum-1
CTACTCGACCGCGACCCACTCCCCGCGCTCGTCGGCGCGCTCGACCGCCGCGAGCGCGCGCTGGACCTCG
TACCCATCTTCGAACGACGGCTCGAACGGCCGGCCCTCGGCGACCGCCGAGAGGAACTCGTAGTTCTCGT
GCACGAACGTGTGCTCCCACCCGATCACGTGCCCGGGGGGCCACCAGCGGTCGACGTACGGGTCCGACTC
CTCGGTCACCAGCACCGTCTCGTAGCCGCGGTTCCCCTCGCGGAGCACCTCCAGTTCGTTCAGCCGCTCC
AGGGAGAACCTCAAGCTTCCCTTCGATCCGTGGACCGCGATCGTGTGGTCGTTCTTGTGCCCCTCGGCGA
CGCGGCTCGCCTCGAAGCTCCCGGTCGCGCCCGACTCGTAGGCGACCTGCGCGTCGTACGCGTCGTCGAC
CGTCACGTCGCGGTACTCCTCTATCTCCCCCTCGTCGTCGTAGACGGGCCGCTCGTCGACGAACGTCGTC
AGCTGTCCCGAGACGCGGTCGATCCCGCCGACAGCGTCGCCGACGAGGAAGTTCGCGAGGTCGATCGTGT
GCGCGCCGAGGTCGCCGAGCGCGCCGGATCCGGCCATCTCGGCGTCCATCCGCCACGCCCACGGCGCCTC
GGGATCGACGAGCCAGTCCTGGAGGTACCGCCCGCGGACCTGCCGGATATCGCCGAGTTCCCCGTCCTCT
ATCAGCCCCTTCGCGTAGCGGATCGCGGGGACGAAGCGGTAGTTGAACGCGGCCCCGGCCGTGACGCCCG
TCGCGGCCGCCGCGTCGCGCATCGCCGCCGCCTCCGCCATCGTCGGCGCGAGCGGCTTCTCGCAGAGGAC
GGGGACCCCCGCTTCGAGGGCCGCGATCGACGGCTCCGCGTGGACGTGGTTCGGCCCGAGGTTGTAGAAG
ACGTCCACCTCGTCGAGCGCGGCCTCCCAGTCGGTCGCGGTGTGCGAGAAGCCGAACCGCTCGGCCGCGT
CCGCGAGCGCCGCCTCGTCGCGCCCGACGAGCGTGTGGCGCTCGATCTCGGGCGCGTCCGGGAAGAACAT
CGGGAGCCGCGCCATCGCGTTCGCGTGCGCCTTGCCCATGAATCGATACCCCAGAACGCCGATCTTCAGT
GGTTCGTCGGTCATTGTCATGGATTATCGCGGTCGCCGCCTCACTCCGCCCAGTAGGCGTCGCCCGGTTC
CGTCTCGAACACCGCGCGGTCGAGCACGTCGACGGCCTTCTCTAACCCCTCCCGGGACGACGTGAGCGAG
TCCTCGTGTTCGATCGACAGCGCGCCCTCGTAGCCGACCATCCGGAGCGTCGAGACGACGTCCTTCCAGT
GTTCCTCGCCGTGGCCGTAGCCGATCGAGCGGAACAGCCACGAGCGGTCGGCCTCCTCGGCGTAGCCGGT
CGTGTCGAGGACGCCCTTCACGCGGGCCTTCGCGTCGTACACTTTGGTGTCCTTCGCGTGGACGTGGTGG
ATCGCGTCGCGCTCGCCGAGGAAGCGGATCGCCTCCGTCACGTCGATCCCCTGCCAGTAGAGGTGCGAGG
GGTCGAAGTTGGCCCCGATCCGGTCGTTCGTCGCCTCCCGGAGCGCGAGCAGCCCGGTCGGCTCGTACAC
CAGCATGTTCGGGTGCATCTCGATCGCCACGTCGACGCCGTGATGCTCGGCGTGCTGCGCCAGGTCGCGC
CAGTAGGGGATCGCGACCTCGTCCCACTGGTAGTCGAGCGCGTCGGCGTGTTCCGTCGGCCACGGCGCCG
TGACCCAGTTCGGCGTCGAGTCGCCGGGCGCCCCGGCGGGGAGCCCGGAGAAGCAGGTCACCGCGTCGAC
GCCCAGCTGGTCCGCCAGCTCGATCGCCTCGCGCAGCTCGCGGTCGGCCGCCGCGGCCCGCTCCTCGTCG
GGATGGAGCGGGTTGTTGTGCGTCGCCAGCGCGGAGATCCGGAGGTCGTGGTCGTCGAGCAGCGCCCGGA
GGTCCTCGCGGGCCGCCGCGTCGTCCAGGAGCGCCTCGCGGTCGACGTGGTCCTCGCCGGGCCAGCCGCC
GACGCCGAGTTCGACGGCGTCGACGCCGATCCCGTCGAGGTACGCGGCCGCGTCGTCGAGCGGTTCGTCG
CCCAAGGGAACCGTTAGCACGCCGATGTCCAT

>Halorubrum_saccharovorum-1
TCAGATCTCGGTCCAGCGATCCGTCTCATCGCTCCGGCTAATGGCGTCGAGGACGCGCTGAACGGCCAGG
CCGTCCTGGAAATTCGGGTGGTACTCGGACCCCTCGGCGACGGCCGTGAGGAATTCGTAGTCCTCGTGAA
CGAACGTGTGTTCCCAGCCGATGGTATGGCCCGGCGGCCACCAGTGGTCGATGTAGGGATCGTCGGGATC
GGTCACGAGAACCGTCTCGAAGCCGCGGTCGTCTCCGCGGAGCACCTCCAGTTCGTTGAGCCGTTCGAGG
TCGAATCTCAGGCTCCCCTCCGAGCCGTTCACTTCGATCGTGTGGGCGTTCTTTCGCCCGTTGGCGAAGC
GGGACGCCTCGAAGGTTCCCATCGCGCCTCCTTCGAAGACCGCTTGAGCGGAGTAAGCGTCGTCGACGGT
GACCTCGCGGGTCTCGACGCTCTCCTGGCTCTCTGCGTCGAGACCACCGCCGCCCTCGCCTGGCACCGGC
CGCTCGTCGACGAAAGTGTGGAGGTGGCCGCTGACGCGTTCGATCCGGTCACCGAGCAGGAACTGCGCGA
GGTCGATCGAGTGCGCACCTAGGTCACCGAGTGCACCGCTACCGGCCAGTTCCTCGCTGTTCCGCCACGA
CCACGGCGCCTGCGGATCGACGAGCCAATCTTGGAGATAGGTCGCCCGGACGTGGTGGATCTCGCCGAGG
ACCCCGTCGTCGATGAGTTCCTTCGCGTACCTGATAGCCGGCACGTACCGATAGTTAAACGCGATCGCGG
TGGGGACGTCTGCATCGTCGGCCGCCGCCGCCATCCGTTCGGCATCGTCGGTCGTCGCTGCGAGCGGTTT
CTCACAGAGAACGGGGACGCCTGCCTCGAGCGCGGCGATAGCCGGCTCGGCGTGAACGTGATTCGGTCCC
ACATTGTAGAAGACGTCGACCGCGTCGATGGCTTCCTGCCAATCGGTCGTCGTCCGAGAGAATCCGAGCC
GGTCAGCGGCGTCTGCGAGCGCCTCTTCGTCGCGGCCGACGAGGATGTCTCGCTCGATCTCCGGTGCCTC
CGGGAAGAACATGGGAAGCCGGGCGAACGCGTTCGAGTGAGCCTTTCCCATGAACCGGTAGCCGAGCATC
CCGACAGTGACTGTCATGGTTTCAGGCCCAGTAGGCGTCTCCCGGCTGCGTCTCGAAGACCGCTCGCTGG
AGCACATCGACGGCCCGCTCCAGTCCTTCGCGGCTCGACGTGAGCGAGTCCTCGTGCTCGATCGACAGCG
CGCCCTCGTAGCCGACCATCCGGAGCGTCGAGACGATGTCCTTCCAGTGGGACTCGCCGTGGCCGTAGCC
GATCGAGCGGAACAGCCACGAGCGGTCGGCCTCAGCGGTGTACGGCTCGGTGTCGAGAACTCCCTTCACG
CGCGCGTTCGCGTCGTACACCTTCGTGTCCTTCGCGTGGAAGTGGTGAATCGCGTCGCGCTCGCCCAGGA
AGCGGATCGCCTCGGTCACGTCGATCCCCTGCCAGTAGAGGTGCGAGGGATCGAAGTTGGCGCCGATCCG
CTCGTTCGTCGCCTCTCGGAGCCGCATCAACCCGGTGGGCTCGTACACGAGCATGTTCGGGTGCATCTCG
ATACAGATGTTCACCCCGTGGTCGTCGGCGTGCTCCGCCAGAGCGGTCCACGTCGGCACGGCGACCTCCT
CCCACTGGTAGTCGAGCGCCTCGGCGTGTTCCGGCGGCCACGGCGCCGTAACCCAGTTCGGGACCTCGTC
GTTCGGCCCGCCTCCCGGGAGCCCGGAGAAGGTGTTGACGTTTTCCACCCCCAACTGGTCGGCGAGGCGG
ACTGCCTCTTGGATCTCCGTTACCGCTCGGTCGGCGCGGTCGTCGTCCGGATGCAGCGGGTTGTTGTGCG
TCGACAGCGCGCTAATCTCTAGGTCGTGTTCGGCGACCAGCTCGAGCAGCTCTTGCTGTGCCGCTTCGTC
GTCGAGGTACTCTTCGCGCGCGAGGTGACTATCACCGACGAACCCGCCGCAGCCGAACTCAACCGCACCG
ACTCCGATTTCGGAGAGGTATTCCAGCGTCTGATCTAACGGCTCTTCACCCAGTGCCACTGTAAGGACTC
CTACATCCAT

>Halorubrum_tebenquichense-1
TTAGATTTCGACCCACTCTCCGAGTTTGTCGGCCCGCTGGATCGCCGCGAGTACCTGCTGGACCTCGTAG
CCGTCCGCGAACGACGGTTCGAACGACTTCCCCTCGGCGACCGCCGAGAGGAACTCGTAGTTCTCGTGGA
CGAACGTGTGTTCCCACCCGATCACGTGGCCGGGGGGCCACCAGCGGTCGACGTACGGGTCCGTCTCCTC
GGTGACGAACACCGTCTCGTAGCCGCGGTTCCCCTCGCGGAGCACCTCCAGTTCGTTGAGCCGCTCCAAG
GAGAACTTCACGCTCCCCTCCGAGCCGTGGACCGCGATCGCGTGGTCGTTCTTGTGCCCCTCGGCGACCC
GGCTGGCCTCGAAGGTCCCGGTCGCGCCCGAGTCGTAGGCGACCTGCGCGCTGTAGGCGTCGTCGACCGT
CACGTCGCGGTACTCGGCGACCTCGGCGTCGGCTTCGCCCGCCGCGTCGCCGTCGACGTACACCGGCCGC
TCGTCGACGAACGTCGTCAACTGCCCGGAGACGCGGTCGATCCCGCCGACCTCCTCGCCCACGAGGAAGT
TCGCGAGGTCGATCGTGTGCGCGCCGAGGTCGCCGAGCGCGCCGGATCCCGCCATGTCGGCGTCCATCCG
CCACGCCCACGGGGCCTCCGGGTCGACGAGCCAGTCCTGAAGGTACCGCCCGCGGACCTGCCGGATCTCG
CCGAGTTCGCCGTCTTCGATCAGTCCCTTCGCGTACCGGATCGCGGGGACGAACCGGTAGTTGAACGCGG
TACCGGCGGTCGCGCCGGTCGCGGCCGCGGCGTCGCGCATCGCCGCGGCCTCCTCCAGTGTCGGCGCGAG
CGGCTTCTCACAGAGGACGGGGACCCCCGCTTCGAGGGCCGCGATCGACGGCTCCGCGTGGACGTGGTTC
GGGCCGAGGTTGTAGAAGACGTCCACCTCGTCTATCGCCGCCTCCCAGTCGGTCGCGGTGTGCGCGAAGC
CGAACCGGTCGGCCGCCCCCGCGAGGGCGTCCCGGTCGCGCCCGACGAGCGTGTGCCGCTCGACCTCGGG
CGCGTCCGGGAAGAACATCGGGAGCCGCGCGAGCGCGTTCGCGTGCGCCCTGCCCATGAATCGATACCCC
AGCACGCCGACCTTCAGCGGTTCCTGTGTCATGTGTGGATCCCCTCACTCCGCCCAGTACGCGTCGCCCG
GTTCGGTCTCGAAGGCGGCGCGGTCCAACACGTCGACCGCCTTCTCCAACCCCTCGCGCGAGGAGGTGAG
CGAGTCCTCGTGTTCGATCGACAGCGCGCCCTCGTACCCGACCATCCGGAGCGTCGAGATCACCTCTTTC
CAGTGCTCTTCCCCGTGGCCGTAGCCGATCGAGCGGAACAGCCACGAGCGGTCCGACTCGCCGGCGTACC
CGGTCGTGTCGAGGACGCCCTTCACTCGCGAGTTGGACTCGTACACCTTCGTGTCCTTCGCGTGGACGTG
GTGGATGGCGTCGTGCTCGCCGAGGAAGCGGATCGCCTCGCAAACGTCGATCCCCTGCCAGTAGAGGTGC
GAGGGGTCGAAGTTGGCACCGATCCGCTCGTTCGTCGCCTCGCGCAGCGCGAGCATGCCGGTCGGCTCGT
ACACCAGCATGTTCGGATGCATTTCGATCGCGACGTCGACGCCGCAGTCCTCGGCGTGTTCGGCGAGGTC
CGACCAGTACGGGACCGCGACCTCGTCCCACTGGTAGTCGAGCGCGTCGGCGTGTTCGGTCGGCCACGGG
GCCGTGATCCAGTTCGGCGTCGAATCGCCGGGCGCGCCCGCGGGAAGCCCTGAAAAGCACGTCACCGTGC
CGACACCGAGCAGGTCGGCCAGTTCGATCGCCTCGCGCAGTTCGCGGTCCGCGGTCGCGGCCCGCTCCTC
GTCCGGGTGAAGCGGGTTGTTGTGCGTCGCGAGCGCGGAGATCCGGAGCCCGCGGTCGTCGAGCACTCCG
CGGAGATCCTCGCGCGCCCCCTCGTCCTCCAGGAGCGTCTCGCGGTCGGCGTGGTCCTGCCCGGGCCACC
CACCGACGCCGAGTTCGACGGCGTCGACGCCGAGCCCGTCGAGGTACGCGGCCGCGTCGTCGATCCGTTC
GCCGCCGAGGGGAACGGTCAAGACGCCGATGTCCAT

>Halorubrum_terrestre-1
TTGGGCGACGAACCGCTCGACGACGCTGCCGCGTACCTCGACGGGATCGGCGTCGACGCCGTCGAACTCG
GCGTCGGCGGCTGGCCCGGCGAGGACCACGTCGACCGCGAGGCGCTCCTGGACGACGCGGCGGCCCGCGA
GGACCTCCGGGCGCTGCTCGACGACCACGACCTCCGGCTCTCCGCGCTGGCGACGCACAACAACCCGCTC
CATCCCGACGAAGAGCGGGCCGCGGCGGCCGACCGCGAACTGCGCGAGGCGATCGAGCTGGCGGACCAGC
TGGGCGTCGACGCGGTGACCTGCTTCTCCGGGCTCCCCGCCGGGGCGCCCGGCGACTCGACGCCGAACTG
GGTCACGGCGCCGTGGCCGACGGAACACGCCGACGCGCTCGACTACCAGTGGGACGAGGTCGCGATCCCC
TACTGGCGCGACCTGGCGCAGCACGCCGAGCATCACGGCGTCGACGTGGCGATCGAGATGCACCCGAACA
TGCTGGCCTACGAGCCGACCGGGCTGCTCGCGCTCCGGGAGGCGACGAACGACCGGATCGGGGCCAACTT
CGACCCCTCGCACCTCTACTGGCAGGGGATCGACGTGACGGAGGCGATCCGCTTCCTCGGCGAGCGCGAC
GCGATCCACCACGTCCACGCGAAGGACACCAAAGTGTACGACGCGAAGGCCCGCGTGAAGGGCGTCCTCG
ACACGACCGGCTACGCCGAGGAGGCCGACCGCTCGTGGCTGTTCCGCTCGATCGGCTACGGCCACGGCGA
GGGACACTGGAAGGACGTCGTCTCGACGCTCCGGCTGGTCGGCTACGAGGGCGCGCTGTCGATCGAACAC
GAGGACTCGCTCACGTCGTCCCGGGAGGGGTTAGAGAAGGCCGTCGACGTGTTGGACCGAGCAGTCTTCG
AGACGGAGCCGGGCGACGCCTACTGGGCGGAGTGAGGCGGCGACCGCGAAATCCACGACAATGACCGACG
AACCACTGAAGATCGGCGTTCTGGGGTATCGATTCATGGGCAAGGCGCACGCGAACGCGATGGCGCGGCT
CCCGATGTTCTTCCCGGACGCGCCCGAGATCGAGCGCCACACGCTCGTCGGGCGCGACGAGGCGGCGCTC
GCGGACGCGGCCGAGCGGTTCGGCTTCTCGCACACCGCGACCGACTGGGAGGCCGCGCTCGACGAGGTGG
ACGTCTTCTACAACCTCGGGCCGAACCACGTCCACGCGGAGCCGTCGATCGCGGCCCTCGAAGCGGGGGT
CCCCGTCCTCTGCGAGAAGCCGCTCGCGCCGACGATGGCGGAGGCGGCGGCGATGCGCGACGCGGCGGCC
GCGACGGGCGTCACGGCCGGGGCCGCGTTCAACTACCGCTTCGTCCCCGCGATCCGCTACGCGAAGGGGC
TGATAGAGGACGGGGAGCTCGGCGATATCCGGCAGGTCCGCGGGCGGTACCTCCAGGACTGGCTCGTCGA
CCCCGAGGCGCCGTGGGCGTGGCGGATGGACGCCGAGATGGCCGGATCGGGCGCGCTCGGCGACCTCGGC
GCGCACACGATCGACCTCGCGAACTTCCTCGTCGGCGACGCTGTCGGCGGGATCGACCGCGTCTCGGGAC
AGCTAACGACGTTCGTCGACGAGCGGCCCGTCTACGACGACGAGGGGGAGATAGAGGAGTACCGCGACGT
GACGGTCGACGACGCGTACGACGCGCAGGTCGCCTACGAGTCGGGCGCGACCGGGAGCTTCGAGGCGAGC
CGCGTCGCCGAGGGGCACAAGAACGACCACACGATCGCGGTCCACGGATCGAAGGGAAGCTTGAGGTTCT
CCCTGGAGCGGCTGAACGAACTGGAGGTGCTCCGCGAGGGGAACCGCGGCTACGAGACGGTGCTGGTGAC
CGAGGAGTCGGACCCGTACGTCGACCGCTGGTGGCCCCCCGGGCACGTGATCGGGTGGGAGCACACGTTC
GTACACGAGAACTACGAGTTCCTCTCGGCGGTCGCCGAGGGCCGGTCGTTCGAGCCGTCGTTCGAAGAGG
GGTACGAGGTCCAGCGCGCGCTCGCGGCGGTCGAGCGCGCCGACGAGCGCGGGGAGTGGGTCGCGGTCGA
GTAG

>Halosarcina_pallida-1
TCAGGGTTCGACCCACTGACCGCTCTCGTCGGAGCGTTCGACGGCGTTGAGGATTCGCTGGACCTCGTAG
CCGTCCTCGAAGGAGGGGCGGAACTCCTCGCCGTCGCGCACGGCCGAGAGGAACTCGTAGTTCTCGTGGA
CGAACGTGTGCTCCCAGCCGAGGACGTGCCCCGGCGGCCACCAGTGTTCGACGTAGGGGTCCGACCCGTC
CGTCACCAGAATCGTCTCGTAGCCCCGCCCGTCAGCGCGCTTGTACTCCAACTCGTTCAGCCGTTCCAAG
GAGAACTTCAGGCTGCCGTCCGTGCCGTGGATCTGAATCGTGTGGTCGTTCTTGTGCCCGTCGGCGACGC
GGGACGCCTCGAAGGTGCCCGTCGCGCCGTTCTCGTACTCCGCCTGCGCCGTGTAGGCGTCGTCGACGGT
GACCTCCCGCGTCTCCTCTTCGCCCTCGACGGGTCGTTCGTCGACGAACGTCTTCAGGTGCCCGGAGACG
CGCGCTATCTCGCCCGCGGCGTCGCCGGCGAGGAACCGCGCGAGGTCGACCGTGTGCGCGCCCAAATCGC
CCAGCGCGCCGCTTCCGGCCAGTTCCTTCGAGTTGCGCCACGACCACGGCGCCTCGGGGTCGACGAGCCA
ATCCTGCAGGTAGCTCCCGCGAACCTGTCGAATATCGCCGAGTTCGCCGTCGTCGATGAGCCCCTTCGCG
TACTGGATGGCGGGGACGAAGCGGTAGTTGAACGCGTTGCCCGCGGGAACGTCCGCGTCCGCGGCGGCGT
CGCGCATCTCCTCGGCGGTGTCGAGGGTGGGCGCGAGCGGTTTCTCGCAGAAGACGGGCGTGCCGGCTTC
GAGGGCGGCGATGGAGGGTTCGGCGTGGACGTGGTTGGGACCGAGGTTGTAGAAGGCGTCCACCTCGTCT
ATCACGTCCGCCCACTCGGTCGAGGTGTGCTCGAAGCCGAGTTCGTCGGCCGCCTCGGCGAGGGCCTCCT
CGTCGCGGCCGACGAGGGTGTGCCGATTTATCTCCGGGGCGTCCGGGAAGAACATCGGCAGTCGCGCCAA
TGCGTTCGAGTGGGCTTTGCCCATGAAACGGTAGCCGAGGATTCCGATGTCGAGCGCCATGCCCCCGCTT
CACGCGGTGGCGGCTTAGCGTTTCATATCTGTCGAGTTCCCCGGGAGCGTCTCCCGCGGGAACCTCACTC
CGCCCAGTACGCCTCGCCCGGTTGCGTGTCGAACACGGCACGGTCGAGGATGTCGACGGCCTTCTCCAGT
CCCTCGTTCGAGGAGGTCAGCGAGTCCTCGTGTTCGATGGACAACGCGCCCTCGTAACCGACCATGCGGA
GCGTCGACACCACGTCCTTCCAGTGGCTCTCGCCGTGGCCGTAGCCGATGGAGCGGAACAGCCACGAGCG
GTTCGACTCGTCGGTGTAGTCGGTGGTGTCGAGGACGCCCTTCAGCCGCGAGTTCCACGAGTACACCTTC
GTGTCCTTCGCGTGGAAGTGGTGGATGGCGTCCTTCTCGCCGAGGAAGCGGATGGCGTGGCAGATATCGA
TATCCTGCCAGTAGAGGTGCGAGGGGTCGAAGTTCGCGCCGATGCGCTCGTTCGTCGCCTCGCGCAGTTG
CATCATGCCCGACGGCTCGTAGACGAGCATGTTCGGGTGCATCTCGATGGCGACGTCGACGCCGTGGTCG
TCGGCGAACTCCGCGAGGTCCGACCAGTAGTCGACGGCGACCTCCCACTGGTAGTCGCGGGCGTCGGCGT
GCTCGGTCGGCCACGGCGCCGTAATCCAGTTCGGCACCTCGTCGTTCGGGCCGCCGGCGGGGAGGCCGGA
GAAGCAGGTGACGGTGTTCACATCCAAGGCGTCCGCGAGTTCGATGGCCTCGCGCAGTTCCGTGTCGGCC
TCGTCGGCCTCCTCCTCGTCGGGGTGCAGCGGGTTGTTGTGCGTCGCCAGCGCGCTTATCTGCATGTCGT
GTTCGTCCGCGAGGTCGAGGAGTTCCTCTCGCTTCCCCTCGTCGTCGAGGGCCGCGCGCCGGTCGAGGTG
GTCGTCGCCGGGGAAGCCCCCGACTCCGAGTTCGACGCCGTCGACGCCGATGTCGTCGAGGTACGAGAGC
GCGTCCGGGAGCGATTCGCCGCCGAGCGGAACCGTGAGTACGCCGATGTACAT

>Halosimplex_carlsbadense-1
ATGGACGTAGGTGTGCTGACAGTGGCACTCGGCGGCGAATCGCTCGACGACGCGTTCGCGTACCTGGCCG
ACCAGGGCGTCGACGCCGTCGAACTGGGCTGTGGCGGGTTCGTCGGCGACGACCACCTCCCGCGCGAGGA
GTATCTCGACGACGAGGACGCCCAGGCCGACCTGCAGGCCAGCCTCGATGAGCACGACCTGTACGTCTCG
GCCCTGGCGACGCACAACAACCCGCTCCACCCCGACGACGAGCGGGCGGCTCGAGCCGACACCGAACTCC
GGGAGGCCATCGAGCTGGCCGACCAGCTCGGCGTCGACGCGGTGACCTGCTTCTCCGGCCTCCCGGCGGG
CGGTCCGAACGACGAGACGCCCAACTGGATCACGGCGCCGTGGCCGAACGAGCACCACGAGGCCCACGAG
TACCAGTGGGAGGTCGCCGAGGAGTACTGGTCGGATCTGGCCGAACACGCGAAAGCCCACGACGTGTACG
TCGGCATCGAGATGCACCCGAACATGCTGGTGTACGAACCCACGGGAATGCTCGAACTGCGCGAGCGGAC
CAACGAGTACATCGGCGCGAACTTCGACCCGTCGCACCTGTTCTGGCAGGGCATCGACATCACCGAGGCC
ATCCGCTTCCTCGGCGAGGAAGACGCCATCCATCACTTCCACGCCAAGGACACGAAGGTCTACGAGTCGA
ACTCCCGCGTCAAGGGCGTGCTGGACACCGAGCCCTACACGGAGGAACCGGACCGCTCGTGGCTGTTCAG
GTCGATCGGCTACGGCCACGGCGAGGAGTTCTGGAAGGACGTGGTCTCGACCCTGCGGATGATCGACTAC
GACGGCGCCCTCTCCATCGAGCACGAGGACTCGCTGACCTCCCCGAACGAGGGCCTGGAGAAGGCCATCG
ACGTGCTCCAGCGTTCCGTCTTCGAGACCACCCCCGGCGACGCCTACTGGGCCTGAACCATGACGGAGGA
ATCACTCTCCGTCGGCGTCCTCGGCTATCGCTTCATGGGCAAAGCCCACGCGAACGCGCTGGCGCGCCTG
CCGATGTTCTTCCCGGAGGCGCCCGCGGTCGAGCGGGAGGTCATCGTCGGGCGCGACGAGGAGGCGCTCG
CGGACGCCGCCGACCAGCTGGGCTTCAACAGGTACGCGACCGACTGGGAAGACGTGGTCGAGGAGGTGGA
CGTGTTCTACAACCTCGGACCGAACAACATCCACGCCGACCCCTCGATCGCGGCGCTGGAGGCCGACACG
CACGTCTTCTGCGAGAAGCCGCTCGCGCACACGCTCGACGACGCCGAGCGCATGCGCGACGCCGCCCGCG
ACTCGGCGGCGACCGCGGGCATCGCCTTCAACTACCGGTTCATCCCCGCGATCCGGTACGCGAAGAACCT
GATCGACGCGGGCGAACTCGGCGATATCCACCACGTCCGCGGGCGGTACCTCCAGGACTGGCTGGTCGAC
CCCGAGGCGCCGTGGTCCTGGCGCAACTCGAAGGAACACGCGGGGTCGGGCGCGCTCGGTGACCTCGGCG
CCCACACCATCGACCTGGCGCGTTTCCTCGTCGGCGACCGCGCCGGCGACATCTCGCGGCTGTCGGGGCA
TCTCCAGACGTTCGTCGACGAACGGCCGGTCCCCGGCGGCGACGAGGGATCGCTGGAGGGGGGCGGTGGC
GACTCGACGGAGACGCGCGAGGTGACCGTCGACGACGCCTACACCGCACAGGCCGAGTTCGAGAACGGCG
CGATGGCGACCTTCGAGGCGTCGCGGTTCGCCAACGGCCGCAAGAACGACCACACGATCGCCATCGAGGG
GTCGAAAGGCAGCCTCTCGTTCTCGCTCGAACGCCTGAACGAACTCGAACTGCTCACCGAAGGTGATCGG
GGCTTCCAGACGATCAACGTCACCGCCCCCGACGACCCCTACATCGACCACTGGTGGCCCGAGGGCCACG
TCATCGGCTGGGAACACACGTTCGTCCACGAGAACTTCGAGTTCCTCTCGGCGGCCGCCGCCGGCGAGGC
CCACAGCCCTTCCTTCGAGGACGGCTATCGCGTGCAGGAACTGCTCGCCGCGATCGAGGCGTCCGACGAC
GCCGGCGAGTGGGTCGACGTCTAA

>Halovivax_asiaticus-1
TCACTCGTCTCGTAAAACCCGCTCCCAGGATCCCGACTCGTCGCTGGCTTCGATCGCGGCGAGGACCTGC
TGGGCAGCCAGACCGTCCGCGAACGACGGCTCGTACGCCGCTCCATCGGCGATGGCCTGCAAGAACGATG
CGTTCTCGTGGACGAACGTGTGTTCCCACCCGAGGACGTGGCCCGGTGGCCACCAGTGATCGATGTAGGG
ATCGCTTTCGTCGGTGACGAGAACGGTCTCGTACCCTCGGTCGTCTTGGCCGAGCACCGCTAGCTCGTTG
AGTCGCTCGAGCGAGAATCGGAGACTTCCCTCGCTCCCGTGGATTTCGATCGTATGGTCGTTCTTGTGAC
CCGGAGCGATCCGAGAGCCTTCGAGGATGCCGGTCGCGCCGCCTTCGAACGCGAGCTGGGCGGTGTACTC
GTCGTCCACGGTCACGGGTCGGGTTTCGCCAGGAGCGTCTTCCACGGGTCGTTCCGTCACGGCCGTTCGC
AGATGCCCGCTCACGCGTTCGATCCGACCGGCACCGGGTGCATCTCCGACGAGGAATCGGGCGAGATCGA
CCGTATGTGCGCCAAGGTCACCGAGCGCACCGGAACCGGCCAACTCCGCGTCGAGCCGCCAGGACCACGG
TGCCTCCGGATCGACGAGCCAGTCCTGCAGGTAGCGTCCACGGAAGGTCCGAATGTCGCCGAGCGTGCCG
GACTGAATCAGTTCGCGCGCGTATCGAATCGCCGGAACGAACCGGTAGTTGAAGCCACACGCCGTCGGCA
CACCGGCCGAACGGGCGGCTGCTGCCATCTCAGTGGCGCCGTCGAGCGTCGCCGACAGCGGTTTCTCTGA
GAAGACCGAGACGCCGGCCTCGAGCGCCGCGATCGACGGTTCAGCGTGCAGGAAGTTCGGTCCGAGATTG
TAGAAGACGTCGACCTCGTCGACGACCGATCGCCAGTCGGTCGCCGTCCGATCGAACCCGAGTCGCGTCC
GCGCGTTCTCCAGGGCCTCTTCGTCACGCCCGATCAAGACGTCACGCGTGACGGCCGGTGTGTCGGGAAA
GAACATCGGGAGCCGGGCGAACGCGTTGGCGTGGGCGGTACCCATGAACCGGTAGCCGAGGACGCCGACG
TCGAGTGCCATGCGGACGCTTCGCCGACGCGACAGTTAGCAATTATTCACAGCCGGCAACCAGTCTATTT
CCCGCCTTTCGTCCGACGCCCTCAGTCGATGCCTTCGGTCCAGAACGGGGCGTCGGGTTCGCCCTCGAAG
ACGATCGGCGCCAAAAACTCGATGGCCTTCTCGAGACCGTCTTCGGAACTCGTTAGCGAATCCTCGTGCT
CGATGCTGATGGCGTCGTCGTAGCCGACGAGGCGCAACGTCGAGACGACGTCCTTCCAGTGGCGAGCGCC
GTGGCCGTAGCCGACGGAGCGAAACAGCCACGAACGGTCGCGTTCTCGGTCGAACGGCGTCGTGTCGAGG
ACCCCTTTCACTCGCACGTTGGCGTCGTACCGGCGCGTATCCTTTGCGTGGACGTGGTGGATCGCGTCGT
GTTCCCCGAGCGCCCGGATCGCGTCGGTGATCGAGATACCCTGCCAGTAGAAGTGCGAGGGATCGAAATT
GGCACCGATTCGCGGACCCGTTTCGTCACGTAGTCGCAGCAGTCCCGTCGGCTCGTACACGAGCATGTTC
GGATGCATCTCGATCGCCACGTCGACGCCGTGGGTGTCGGCGACCGAGGCAATTTCTTCCCAGTACTCGA
TCGCGACGTTCCACTGGTAGGAAAGCGCGGATTCGTGTTCGGGCGGCCACGGTGCCGTGATCCAGTTCGG
CGTCTCGTCGTCCGGGCTCCCCGCCGGAAGCCCGGAGAAGCACGTCACCGTCGAGACATCGAGCTGGGCA
GCCAGGCGAATCGCCTCCCGAAGTTCGGTGTCGGCCCGTGATGCACGTGCCTCGTCCGGGTGGAGTGGAT
TGTTGTGCGTCGCAAGGGCACTGATTCGTATCCCGTAACGATCGAGGGCGTCCCGAAGTTCAATCTGCGC
TTCGTCGTCGTTCAGGTACGTCGCTCGCGCCACGTGGTCGTCTCCGGGAAAGCCGCCGACACCGGGTTCG
ACGGCGGAGACACCGAAGTCGGACAGATATTCGAGGACATCCTCGAACGATCGATCTGCCAGCGCCGGCG
TGTGTACACCCAGATCCAT

>Natronobacterium_gregoryi-1
TTACTCTAGCGTCAGCCACTCGCCGCGCTCGTCGCTCTCGACGACTCGCTCGAGGACGCGCTGGGCTGCG
AGCCCATCGGCGAAATTCGGTTCGAACTCGCCGTCCTCTCCGGCGGTTTCACCGTCCTCGTTTCGAGGCG
TCTGTGACGCCTCGCTCCCCGCGACCGCAGCGAGGAACTCGTAGTTCTCGTGGACGAACGTGTGCTCCCA
GCCGATGACGTGTCCCGGTGGCCACCAGTGGTCGACGTACGGATCGTCCGCGTCGGTCACCAGGATCGTC
TCGTAGCCACGGTCGCTCTCGCGGTGGACTTCGAGTTCGTTCAGTCGCTCGAGCGAGAACCGTAGACTGC
CCTGCGAGCCGTGGATCTCGATCGTGTGGTCGTTCTTGTGGCCCGTCGCGTACCGCGATCCCTCGAGCGT
GCCGACGGCACCGTTTGCGAACTCGAGCTGGGCAGAGTAGGCGTCGTCGACGGTGACGGGGCGGGTTTCG
ACGGCGTCGCCGTCTCCACGAGACTCCTCCGGAGTCTCGGCGCTTCCGTCCTCGACAGGGCGCTCGTCGA
CGAACGTCTGTAAGTGGCCACTGAGCCGTTCGATGTCGCCCGCGAGGTCGTCGTCGCCCACCAGAAACCG
GACCAGATCGACCGTGTGGGCACCGAGGTCGCCGAGCACGCCCGAGCCAGCCAACTCCTCGTCGAGTCGC
CACGACCACGGCGCGTCGGGATCGACCAGCCAGTCCTGCAGATAGCGACCGTGGACGTGGCGGATCTCGC
CGAGTTCGCCGTCCTCGAGCAGCGCCTTCGCGTACTGGATCGCGGGGACGAACCGGTAGTTGAACGCGGT
TCCTGCGGGGACGCCGGCCTCAGCAGCGGCGTCGGCCATCCGCTCGGCGTCGTCGAGCGTCGGCGCGAGC
GGTTTCTCGCAGAAGACGGGGGTGCCCGCCTCGAGCGCCGCGATCGACGGCTCGGGGTGGACGTGGTTCG
GCCCGAGATTGTAGAAGACGTCGACGTCGTCGACGACCGCCTCCCAGTCGGTCGAAATCGAGTCGAAGCC
CAGGCGGTCGGCCGCCTCCTCGAGTGCGTCCTCGTCCCGGCCGACCAGCACAGAACGGGAGACGTCTGGC
GCGTCCGGAAAGAACATCGGCAGCCGTGCCATCGCGTTCGCGTGTGCTTTACCCATGAACCGATAACCGA
GTACACCGACTTCGAGTGGTTCAGTCATAGTGTCAGTTGTCGTAGGTAGCGGTTTTCTTCGTCGTGTCTA
TCGCGTCACTCCGCCCAGTAGGCCTCGCCCGGCTGCGTCCGGAAGACGGCACGCTCGAGCAGTTCGACGG
CTTTCTCGAGGCCCTCTCGACTGCTGGTCAGCGAGTCCTCGTGTTCGATGCTCAAGGTGGCGTCGTAGTC
GACCATCCGCAGCGTCGAGACGAGGTCCTTCCAGTGGGACTCGCCGTGGCCGTAACCGACCGAGCGGAAC
AGCCACGAGCGGTTGGGTTCGTCGTCGTAGGCGGTCGTGTCGAGGACGCCTTTCTCGCGGGCCTGTTCCT
CGTAGACTTTCGTGTCCTTGGCGTGGAAGTGGTGGATCGCGTCGTGCTCGCCGAGGAAGCGGATCGCGTC
GGTGATTGAGATCCCCTGCCAGTACAGGTGCGAGGGGTCGACGTTCGCGCCGACGCGGTCGTTGGTCTCC
TCGCGGAGTCTCGCCATCCCGTGGGGCTCGTAGACGAGCATGTTGGGGTGCATCTCGATGGCGAGGTCGA
TGCCGTGATCGTCGGCGAACGCCGCCAGGTCAGACCAGTAGTCGACAGCGACGTCCCACTGGTACTCGTG
GGCTTTGGCGTGTTCGGTCGGCCACGGTGCCGTGATCCAGTTGGGAACCTCGTCTTCGGGTCCGCCCGCG
GGCAGCCCGGAAAAACAGGTGACGACGTCGACGTCGATCTGGTCGGCCAGCCGGATCGCCTCCCGGAGTT
CCGTATTGGCTTCCGCCGCTCGCTCGTCGTCGGGATGGAGCGGATTGTTGTGGGTTGCGAGTGCACTGAC
GTGCATCTCGTACTCCTCGAGCAGGTCGTCGAGTTCGGCCTGGGCGTCCTCGTCGTCGAGGTACTCCTCG
CGTGAGAGGTGGTCCTGCCCCGGGAACCCACCGACGCCGGGTTCGATCGCGTCGACGCCGATCTCCGAGA
GGTAGTCGAGTGCACCCTCGAGCGATTCGTCAGCGAGCGGTGGAGTGTGTACCCCGATATCCAT

>Natronorubrum_sulfidifaciens-1
CTAGCTGATCGAAACCCACTCACGTTTCTCGTCGCTCGCTTCGATCGCTGCGAGCACGCGCTGGGCGGCG
AGACCATCCGCGAAGCTGGGTTCGAACGTATCGCCGCTTGCCACTGCGCTGAGGAACTCGTAGTTCTCGT
GGACGAAGGTGTGCTCCCAGCCCAGCACGTGTCCCGGCGGCCACCAGTGGTCGACGTACGGATCGTCCTC
GTCGGTGACCAGCACCGTCTCGTAGCCGCGATTCTCGTCGGCCCGCATGACCTCGAGTTCGTTCAGTCGC
TCGAGGGAGAATCGCAGGCTGCCCTTCGAGCCGTGGATCTCGATCGTGTGGTCGTTTTTATGCCCCGTCG
CGAACCGGGAGGCCTCGAGAGTCCCCATCGCGCCGTGTTCGAACTCGACCTGCGCGGAGTAGGCGTCGTC
GACGGTCACGGATCGCATCTCATCACTTCCGTCCACAGGTCGCTCGTCGACGAACGTCTGGAGGTGGCCG
CTGACGCGTTCCATCTCGCCGGCGAGGTCGTCGTCGCCGACGAGAAAGCGAAGCAGATCGACCGTGTGCG
CGCCGAGGTCGCCCAGGGCACCCGACCCTGCCATCTCCGCGTCGTTTCGCCACGACCACGGGGCCTCGGG
ATCGACCAGCCAGTCCTGGAGGTATCGCCCGCGGACGTGGTGAATCTCGCCAAGTTCGCCGGCCTCGAGC
AGCCCCTTTGCGTGCTGGATCGCGGGGACGAAGCGGTAGTTGAACGCGGTACCGTTGGGAACGCCAGCCT
CGGCGGCGGCGTCGGCCATTCGTTCGGCCTCGGCAAGCGTCGGCGCGAGGGGTTTCTCACAGAAGACCGG
CGTTCCGGCCTCGAGGGCAGCGATCGAGGGCTCTGCGTGGACGTGGTTCGGCCCGAGATTGTAGAAGACG
TCGACGTCGTCGACGACGGCTTCCCAGTCGGTCGCGATCGACTCGAATCCGAGCTGGTCCGCTGCGTCCG
AAAGGGCGTCTTCGTCGCGGCCGACGAGCACGCTGCGCTCGACCTCCGGTGCGTCCGGGAAGAACATCGA
GAGCCGCGACAGGGCGTTTGCGTGGGCTTTCCCCATAAACCGATAGCCGAGTACACCGACTTCGAGCGTC
ATACACACTCATTCACAATAGGTGTAGTTAGTGCTTTTCGTCACGAGTGACAGTCTCACGATCCGTGATG
AATCGACTCGAGAGACGGTCGGGGTAGCGACGCGGCTACTCGGCCCAGTACGCCTCGCCGGGCTGTTCGC
GGAAAACCGCACGCTCGAGGAGGTTGACTGCCTTCTCGAGGCCTTCCCGCGAACTCGTCAGCGAGTCCTC
GTGTTCGATGCTCAGGGCACCGTCGTAGCCGACCATTCGCAGCGTCGAGACGACGTCTTTCCAGTGGTCT
TCGCCGTGGCCGTAGCCGACCGAGCGGAACAGCCACGACCGGTTGGGCTCGTCGTCGTAGTCAGTCGTGT
CGAGAACGCCTTTCTCCCGGGCCTGCTCCTCGTAGATCCGCGTGTCCTTGGCGTGGAAGTGGTGGATCGC
GTCGTCGAGATAGCGGATCGCGTCGGTGATCGAAATCCCCTGCCAGTACAGGTGTGAGGGGTCGAAGTTC
GCACCGACGCGTTCGTTCGTCGCCTCGCGCAGGCGAGCCATCCCGTGGGGTTCATAGACGAGCATGTTGG
GGTGCATCTCGAGCGCGAGGTCGACGCCGTGGTCGTCGGCGAACGCCGCGAGGTCGGCCCAGTACTCGAT
CGCAACGTCCCACTGGTACTCGTGGGCGTCGGCGTGTTCGCTCGGCCACGGCGCGGTGATCCAGTTCGGC
ACCTCGTCGTCGGGACCACCGGCTGGCAGGCCCGAAAAGCAGGTGACGGTGTCGACGCCGAGCTGGTCGG
CGAGACGGATCGCTTCGCGCAGTTCGGTATCCGCGGTTTCGGCCTGCTCGTCGTCCGGGTGGAGTGGATT
GTTGTGCGTTGCGAGTGCGCTGACGCGCATGTCGTACTCCGCGAGCAGGTCGTGTAATTCGGCCTGTGCG
TCCTCGTCGTCGAGGTAGTCTCGGCGGACGAGGTGGGCGTCGCCAGGGTAGCCGCCGACGCCGGGTTCGA
TTGCGTCGACGCCGATCTCAGAAAGGTATTCGAGGGCTCCCTCGAGCGATTCGTCTGCCAGTGGCGGGGT
GTGAACGCCGATATCCAT

>Natronorubrum_tibetense-1
ATGGACATCGGTGTACACACGCCACCGCTGGCGGACGAATCGCTCGAGGGTGCACTCGCGTACCTCTCCG
AGATCGGCGTCGACGCGATCGAACCGGGCGTCGGGGGTTATCCCGGCGACGACCACCTCGTTCGACGGGA
GTACCTAGACGACGAGGACGCACAGGCCGAGTTGGCGGAGCTGCTCGAGACCTACGGGATGCGGATCAGC
GCGCTCGCGACGCACAACAATCCGCTGCATCCGGACGACGAGCAGGCAGCCGCGGCGGACACCGAACTCC
GCGAGGCGATTCGGCTCGCCGACCAGTTGGGTGTGAACACGGTCACTTGCTTCTCCGGGCTGCCGGCCGG
CGGTCCCGAGGACGAGGTTCCGAACTGGATCACGGCTCCGTGGCCCTCGGAACACGCCGACGCCCACGAG
TACCAGTGGGATGTCGCCCTCGAGTACTGGTCGGACCTCGCCGCACACGCAGACGAGCACGGTATCGACC
TCGCCATCGAGATGCACCCGAACATGCTGGTCTACGAACCCCACGGGATGGCTCGCCTGCGCGAGGAGAC
GAACGACCGGGTCGGCGCGAACTTCGACCCCTCGCATCTCTACTGGCAAGGAATCACGATCAGCGACGCG
ATCCGATACCTCGGCGAGCGCGACGCGATCCATCACGTCCACGCGAAGGACACTCGAGTGTACGAAGAAC
AGGCCCGCGAGAAGGGTGTTCTCGACACGACGGCGTACGACGATGAGTCGAATCGGTCGTGGCTCTTCCG
CTCGGTCGGCTACGGCCACGACGAATCCCACTGGAAGGAGATCGTCTCGACGCTCCGGATGGTCGGCTAC
GACGGCGCGCTGAGCATCGAACACGAGGACTCGCTGACGAGTTCGCGCGAGGGTCTCGAGAAAGCCGTCG
ATCTGCTCGAGCGAGCAGTGTTCCGCGAGCAACCCGGGGACGCGTACTGGGCCGAGTAAGGGCAGGTGAC
GCAGCTCCTGCTCAGACGGATGATCGATATGCCAGAACTGGTCAGTATCCCATCATGACGAACACGATAA
TATAGGAGATCAATCCAAAGATGGCGGTGACCCCCAGCCAGACGAAGACTATGAGAACTGCCTGTCTGCC
GGTCATTCCCTCTCCATCGAGGATTGTACTAAATTGGGCAAGGACATCGTCTCCCCTCATAATTGGGCTT
AGTTGGTAATATGTAAAACGTTACTTGATTTTTGGGCGATAGTAGCCACTGGATATCACTGAACACCCGA
TCACAGAACAGCGTTGCGATCGGTGTGTGAATCGTTTTCTAGAGATGATTGTTCAGTGCGCACGTCGACT
GTGCACGTATTCCTCGAGTGCCCCACGGAAAACTCCCTCGCGACGAAAACCACTAACTACACTCGTTGTG
AACGAGTACGTATGTCACTCGAAGTCGGGGTTCTTGGCTATCGGTTCATGGGCAAAGCACACGCGAACGC
GATGGCGCGGCTGCCGATGTTCTTCCCGGACGCACCGGAGATCGAGCGCAGCGTCCTCGTCGGCCGCGAC
GAGGCGGCGTTAACCGACGCGGCGGATCGACTCGGCTTCGACTCGATCGCGACGGACTGGACCGAGGTCG
TCGACGACGTCGACGCCTTCTACAACCTCGGACCGAACCACGTCCACGCCGAGCCCTCGATCGCGGCGCT
CGAGGCCGGCACGCCGGTCTTCTGTGAGAAACCGCTCGCGCCGACGCTCGAGGACGCCGAAACGATGGCC
GAAGCGGCCCGAGACGCCGGGAGCGACGTGCCCGCCGGTTGTGCGTTCAACTATCGGTTCGTCCCCGCGA
TTCGGTACGCGAAACGGCTGCTCGAGGCGGGCGAACTGGGCGAGATACACCACGTCCGCGGACGGTACCT
GCAGGACTGGCTGGTCGACCCCGAGGCCCCGTGGTCGTGGCGCAACGACGAGGAACTGGCTGGCTCGGGC
GCGCTCGGCGACCTCGGCGCGCACACGGTCGATCTGCTCCGATTCCTGGTCGGCGACGACGACCTCGCCG
GCGAGATGGTCGGCGTCAGCGGCCACCTGCAGACGTTCGTCGACGAGCGGCCGGTTCCGGATTCGGACGA
GTCGCGACCCGTCACCGTCGACGACGCCTACTCCGCGCAGGTCGAGTTCGAAAACGGTGCGATGGGGACG
CTCGAGGCCTCGCGCTTTGCTACCGGCCACAAAAACGACCACACTGTCGAAATCCACGGCTCAGAGGGCA
GCCTCCGGTTCTCTCTCGAGCGACTGAACGAGCTCGAGGTCCTCCGGACGGACGAGAACCGCGGCTACGA
GACGATTCTGGTCACCGACGCGGACGACCCCTACGTCGACCACTGGTGGCCGCCGGGCCACGTGCTGGGC
TGGGAGCACACCTTCGTCCACGAGAACTACGAGTTCCTGAGCGCAGTCGAGAGCGGTGGCGAGTTCGAGC
CGAGCTTCGAGGACGGCCTCGCTGCCCAGCACGTGCTCGCAGCCATCGAGGAGAGCGACGAGAATCGGGA
GTGGGTCTCGCTCGAGTAG

####
Haloferax_Alignment.txt

CLUSTAL 2.1 multiple sequence alignment


Haloferax_larsenii                  ------------------------------------------TTCTG-C- 6
Haloferax_mucosum                   ------------------------------------------TTCTG-T- 6
Haloferax_volcanii                  ------------------------------------------TTC----- 3
Haloferax_volcanii_DS2_DSM_375      ------------------------------------------TTC----- 3
Haloferax_sulfurifontis             TTCATGACTGACAAACTTTCCGTCGGCGTCCTCGGTTACCGCTTCAGGCC 50
Haloferax_gibonsii                  TCCATGTCTGAACCGCTCTCAGTCGGCGTCCTCGGCTACCGCTTCAGGCC 50
Haloferax_prahovense                CTCATGTCTGAACCCCTCAAAATCGGCGTTCTCGGCTACCGCTTCAGGCC 50
Haloferax_alexandrinus              ------------------------------------------TCCA---- 4
Haloferax_lucentense                ------------------------------------------TCCA---- 4
Haloferax_denitrificans             ------------------------------------------TCCATG-A 7
Haloferax_sp_GUBF-3                 ------------------------------------------TCCAATGA 8
Haloferax_sp_GUBF-2                 ------------------------------------------TCCAATGA 8
Haloferax_sp_GUBF-1                 ------------------------------------------TCCAATGA 8
Haloferax_elongans                  -------------------------------------------ACAACG- 6
Haloferax_mediterranei              ------------------------------TTCTCGATGAGTAACACCGA 20
                                                                                *     

Haloferax_larsenii                  --------------------------------------------------
Haloferax_mucosum                   --------------------------------------------------
Haloferax_volcanii                  --------------------------------------------------
Haloferax_volcanii_DS2_DSM_375      --------------------------------------------------
Haloferax_sulfurifontis             CACCTTTTTCCGGTTCGGGGCCGCGTCGCGACCCGCTCACCCCAAAAATA 100
Haloferax_gibonsii                  CACCTTTTTGCGGTTCGGGGCCGCTTCGCGACCCGCTCTCCCCAAAAATC 100
Haloferax_prahovense                CACCTTTTTGCGGTTCGGGGCCGCTTCGCGACCCGCTCACCCCAAAAATC 100
Haloferax_alexandrinus              --------------------------------------------------
Haloferax_lucentense                --------------------------------------------------
Haloferax_denitrificans             CTGACTCACTCAAAATCGGCGTCCTCGGCTACCGCTTCAGGCCCACCTTT 57
Haloferax_sp_GUBF-3                 CTGAACAACTCTCTATCGGCGTCCTCGGCTCCCGATTCAGGCCCACCTTT 58
Haloferax_sp_GUBF-2                 CTGAACAACTCTCTATCGGCGTCCTCGGCTCCCGATTCAGGCCCACCTTT 58
Haloferax_sp_GUBF-1                 CTGAACAACTCTCTATCGGCGTCCTCGGCTCCCGATTCAGGCCCACCTTT 58
Haloferax_elongans                  --------------------------------------------------
Haloferax_mediterranei              TTCTACGACCGAACCCCTCAAAATCGGCGTCCTCGGCTACCGATTCAGGC 70
                                                                                      

Haloferax_larsenii                  --------------------------------------------------
Haloferax_mucosum                   --------------------------------------------------
Haloferax_volcanii                  --------------------------------------------------
Haloferax_volcanii_DS2_DSM_375      --------------------------------------------------
Haloferax_sulfurifontis             TGGACCAAAAACTGCCGCGAGACTCGGCCTCCGGCCTCGCTCGCGGTACC 150
Haloferax_gibonsii                  TGGACCAAAAAGTGCCGCGAGACTCGGCCTCCGGCCTCGCCCGCGGTACC 150
Haloferax_prahovense                TGGACCAAAAAGTGCCGCGAGACTCGGCCTCCGGCCTCGCCCGCGGTACC 150
Haloferax_alexandrinus              --------------------------------------------------
Haloferax_lucentense                --------------------------------------------------
Haloferax_denitrificans             TTCCGGTTCGGGGCCGCTTCGCGACCCGCTCACCGCAAAAATCTGGGCCA 107
Haloferax_sp_GUBF-3                 TTCCGGTTCGGGGCCGCTCCGCGACCCGCTCACCGGAAAAATCTGGACCA 108
Haloferax_sp_GUBF-2                 TTCCGGTTCGGGGCCGCTCCGCGACCCGCTCACCGGAAAAATCTGGACCA 108
Haloferax_sp_GUBF-1                 TTCCGGTTCGGGGCCGCTCCGCGACCCGCTCACCGGAAAAATCTGGACCA 108
Haloferax_elongans                  --------------------------------------------------
Haloferax_mediterranei              CCACCTTTTTCCGGTTCGGGGCCGCTTCGTGGCCCGCTCACCGGAAAAAT 120
                                                                                      

Haloferax_larsenii                  --------------------------------------------------
Haloferax_mucosum                   --------------------------------------------------
Haloferax_volcanii                  --------------------------------------------------
Haloferax_volcanii_DS2_DSM_375      --------------------------------------------------
Haloferax_sulfurifontis             GCATCGGGCACGGAGGTGGCGCA--------------------------- 173
Haloferax_gibonsii                  GCATCGGGCACGGAGGTGGCGCA--------------------------- 173
Haloferax_prahovense                GCATCGGGCACGGAGGTGGCGCA--------------------------- 173
Haloferax_alexandrinus              --------------------------------------------------
Haloferax_lucentense                --------------------------------------------------
Haloferax_denitrificans             AAAACTGCCGCGAGACTCGGCCGCCGGCCTCGCTCGCGGTACTGCACTGG 157
Haloferax_sp_GUBF-3                 AAAAACGCCGCGAGACTCGGCCTCCGGCCTCGCTCGCGGTACTGCATCGG 158
Haloferax_sp_GUBF-2                 AAAAACGCCGCGAGACTCGGCCTCCGGCCTCGCTCGCGGTACTGCATCGG 158
Haloferax_sp_GUBF-1                 AAAAACGCCGCGAGACTCGGCCTCCGGCCTCGCTCGCGGTACTGCATCGG 158
Haloferax_elongans                  --------------------------------------------------
Haloferax_mediterranei              CTGGACCAAAAAGTGCCACGAGACTCGGCCTTCGGCCTCGCTCGCGGTAC 170
                                                                                      

Haloferax_larsenii                  ------------------------
Haloferax_mucosum                   ------------------------
Haloferax_volcanii                  ------------------------
Haloferax_volcanii_DS2_DSM_375      ------------------------
Haloferax_sulfurifontis             ------------------------
Haloferax_gibonsii                  ------------------------
Haloferax_prahovense                ------------------------
Haloferax_alexandrinus              ------------------------
Haloferax_lucentense                ------------------------
Haloferax_denitrificans             TCACGGAGGCGGCACA-------- 173
Haloferax_sp_GUBF-3                 CCACGGAGGTGGCACA-------- 174
Haloferax_sp_GUBF-2                 CCACGGAGGTGGCACA-------- 174
Haloferax_sp_GUBF-1                 CCACGGAGGTGGCACA-------- 174
Haloferax_elongans                  ------------------------
Haloferax_mediterranei              TGAATCGGCTGGTGGGGTGACACA 194
                                                
####
Haloferax_Gaps.fasta

>Haloferax_volcanii
TTC

>Haloferax_volcanii_DS2_DSM_3757
TTC

>Haloferax_alexandrinus
TCCA

>Haloferax_lucentense
TCCA

>Haloferax_elongans
ACAACG

>Haloferax_larsenii
TTCTGC

>Haloferax_mucosum
TTCTGT

>Haloferax_denitrificans
TCCATGACTGACTCACTCAAAATCGGCGTCCTCGGCTACCGCTTCAGGCCCACCTTTTTCCGGTTCGGGGCCGCTTCGCGACCCGCTCACCGCAAAAATCTGGGCCAAAAACTGCCGCGAGACTCGGCCGCCGGCCTCGCTCGCGGTACTGCACTGGTCACGGAGGCGGCACA

>Haloferax_gibonsii
TCCATGTCTGAACCGCTCTCAGTCGGCGTCCTCGGCTACCGCTTCAGGCCCACCTTTTTGCGGTTCGGGGCCGCTTCGCGACCCGCTCTCCCCAAAAATCTGGACCAAAAAGTGCCGCGAGACTCGGCCTCCGGCCTCGCCCGCGGTACCGCATCGGGCACGGAGGTGGCGCA

>Haloferax_prahovense
CTCATGTCTGAACCCCTCAAAATCGGCGTTCTCGGCTACCGCTTCAGGCCCACCTTTTTGCGGTTCGGGGCCGCTTCGCGACCCGCTCACCCCAAAAATCTGGACCAAAAAGTGCCGCGAGACTCGGCCTCCGGCCTCGCCCGCGGTACCGCATCGGGCACGGAGGTGGCGCA

>Haloferax_sulfurifontis
TTCATGACTGACAAACTTTCCGTCGGCGTCCTCGGTTACCGCTTCAGGCCCACCTTTTTCCGGTTCGGGGCCGCGTCGCGACCCGCTCACCCCAAAAATATGGACCAAAAACTGCCGCGAGACTCGGCCTCCGGCCTCGCTCGCGGTACCGCATCGGGCACGGAGGTGGCGCA

>Haloferax_sp_GUBF-1
TCCAATGACTGAACAACTCTCTATCGGCGTCCTCGGCTCCCGATTCAGGCCCACCTTTTTCCGGTTCGGGGCCGCTCCGCGACCCGCTCACCGGAAAAATCTGGACCAAAAAACGCCGCGAGACTCGGCCTCCGGCCTCGCTCGCGGTACTGCATCGGCCACGGAGGTGGCACA

>Haloferax_sp_GUBF-2
TCCAATGACTGAACAACTCTCTATCGGCGTCCTCGGCTCCCGATTCAGGCCCACCTTTTTCCGGTTCGGGGCCGCTCCGCGACCCGCTCACCGGAAAAATCTGGACCAAAAAACGCCGCGAGACTCGGCCTCCGGCCTCGCTCGCGGTACTGCATCGGCCACGGAGGTGGCACA

>Haloferax_sp_GUBF-3
TCCAATGACTGAACAACTCTCTATCGGCGTCCTCGGCTCCCGATTCAGGCCCACCTTTTTCCGGTTCGGGGCCGCTCCGCGACCCGCTCACCGGAAAAATCTGGACCAAAAAACGCCGCGAGACTCGGCCTCCGGCCTCGCTCGCGGTACTGCATCGGCCACGGAGGTGGCACA

>Haloferax_mediterranei
TTCTCGATGAGTAACACCGATTCTACGACCGAACCCCTCAAAATCGGCGTCCTCGGCTACCGATTCAGGCCCACCTTTTTCCGGTTCGGGGCCGCTTCGTGGCCCGCTCACCGGAAAAATCTGGACCAAAAAGTGCCACGAGACTCGGCCTTCGGCCTCGCTCGCGGTACTGAATCGGCTGGTGGGGTGACACA

####
Halorubrum_Alignment.txt

CLUSTAL 2.1 multiple sequence alignment


Halorubrum_saccharovorum            -----------AACC----------------------------------- 4
Halorubrum_lacusprofundi            G-CGGAGGATAAACCAATGACACAGCAACCACTACGAATCGGCGTACTGG 49
Halorubrum_kocurii                  GACGGAGG----------------GCAACC-CA----------------- 16
Halorubrum_distributum              ---GGCG-----------------GCGACCGCGAT-AATCC--------- 20
Halorubrum_distributum_JCM_101      ---GGCG-----------------GCGACCGCGAT-AATCCATGACA--- 26
Halorubrum_litoreum                 ---GGCG-----------------GCGACCGCGAT-AATCCATGACA--- 26
Halorubrum_terrestre                ---GGCG-----------------GCGACCGCGA--AATCCACGACA--- 25
Halorubrum_coriense                 ---GGCG-----------------GCGACCGCGGA-ACGCA--GACA--- 24
Halorubrum_californiensis           ---GACGC--------------TGACGACCGAGA--GATCCACGACA--- 28
Halorubrum_hochstenium              ---GGCGG--------------CGGCGACCAACA--GATCCACGAC---- 27
Halorubrum_aidingense               ----GCG-----------------GCGGAC------ACACCA-------- 15
Halorubrum_tebenquichense           ---GGGG-------------------ATCC------ACAC---------- 12
                                                                                      

Halorubrum_saccharovorum            -----------
Halorubrum_lacusprofundi            GGTACCGCTTC 60
Halorubrum_kocurii                  -----------
Halorubrum_distributum              -----------
Halorubrum_distributum_JCM_101      -----------
Halorubrum_litoreum                 -----------
Halorubrum_terrestre                -----------
Halorubrum_coriense                 -----------
Halorubrum_californiensis           -----------
Halorubrum_hochstenium              -----------
Halorubrum_aidingense               -----------
Halorubrum_tebenquichense           -----------

####
Halorubrum_Gaps.fasta


>Halorubrum_saccharovorum
AACC

>Halorubrum_tebenquichense
GGGGATCCACAC

>Halorubrum_aidingense
GCGGCGGACACACCA

>Halorubrum_kocurii
GACGGAGGGCAACCCA

>Halorubrum_distributum
GGCGGCGACCGCGATAATCC

>Halorubrum_coriense
GGCGGCGACCGCGGAACGCAGACA

>Halorubrum_terrestre
GGCGGCGACCGCGAAATCCACGACA

>Halorubrum_distributum_JCM_10118
GGCGGCGACCGCGATAATCCATGACA

>Halorubrum_litoreum
GGCGGCGACCGCGATAATCCATGACA

>Halorubrum_hochstenium
GGCGGCGGCGACCAACAGATCCACGAC

>Halorubrum_californiensis
GACGCTGACGACCGAGAGATCCACGACA

>Halorubrum_lacusprofundi
GCGGAGGATAAACCAATGACACAGCAACCACTACGAATCGGCGTACTGGGGTACCGCTTC

                                                                                                                                                     
