# Supplementary figures and images for: The Exploration of Novel Regulatory Relationships Drives Haloarchaeal Operon-Like Structural Dynamics over Short Evolutionary Distances
Source: MDPI journal article supplement (doi:10.3390/microorganisms8121900), 2020-11-30

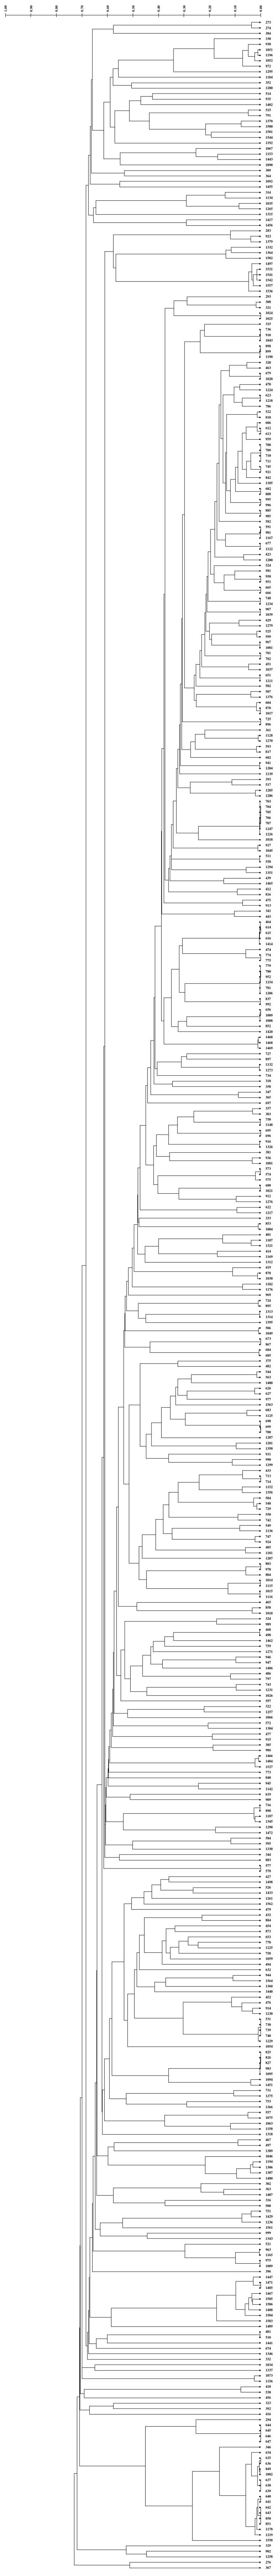

Supplement: s1 [file s1]
